# Supplementary material for: Comparing adventitious root-formation and graft-unification abilities in clones of Argania spinosa
Source: Front Plant Sci. 2022 Nov 14;13:1002703. doi: 10.3389/fpls.2022.1002703 (PMC9702570; doi:10.3389/fpls.2022.1002703)
Supplement: Supplementary Table 4 — List of transcripts in the red zones in Figure 5 . [file Table_4.xlsx]

## Sheet: A
468 common elements in "ARS7 G 1", "ARS7 R3", "ARS1 G4" and "ARS1 R4":
XLOC_000025	PSS10336.1Transcription factor
XLOC_000228	PSS36202.1Protein DETOXIFICATION like
XLOC_000500	XP_002302794.1shaggy-related protein kinase alpha
XLOC_000639	XP_018622779.1 rust resistance kinase Lr10-like isoform X2
XLOC_000900	XP_027099787.1serine/threonine-protein kinase PBS1-like
XLOC_000971	PSR94993.1MLO-like protein
XLOC_001034	PSR89560.1AP-1 complex subunit mu-2 like
XLOC_001070	PSS15888.1Tropinone reductase-like
XLOC_001137	XP_002285554.1 mitochondrial import inner membrane translocase subunit TIM23-2
XLOC_001277	PSS01132.1Adenine nucleotide transporter like
XLOC_001374	---NA---
XLOC_001392	XP_010279570.1 40S ribosomal protein S27-2-like
XLOC_001517	PSR91710.1Transmembrane protein like
XLOC_001529	PSS29184.1G-box-binding factor like
XLOC_001535	XP_002265476.1 actin-101 isoform X1
XLOC_001635	PSS26161.1A-agglutinin anchorage subunit like
XLOC_001738	AXC43359.1squalene synthase
XLOC_001927	PSS08433.1Dual specificity protein kinase
XLOC_001966	XP_002279760.1 ethylene-responsive transcription factor 12
XLOC_001972	---NA---
XLOC_002141	XP_009591073.1 peamaclein-like
XLOC_002377	PSS18170.1D-3-phosphoglycerate dehydrogenase
XLOC_002379	PSS26522.1Glutathione S-transferase
XLOC_002393	XP_006451395.1probable caffeoyl-CoA O-methyltransferase At4g26220
XLOC_002520	PSS00422.1Phosphoserine aminotransferase
XLOC_002524	XP_023904424.1dirigent protein 19-like
XLOC_002526	PSS00422.1Phosphoserine aminotransferase
XLOC_002536	BAO51835.1UDP-glycosyltransferase 94P1
XLOC_002563	PSS29312.1D-3-phosphoglycerate dehydrogenase
XLOC_002583	XP_021609050.1BRASSINOSTEROID INSENSITIVE 1-associated receptor kinase 1-like
XLOC_002633	XP_009598109.1 ribonuclease 3-like protein 3
XLOC_002883	XP_023872335.1UDP-glycosyltransferase 73C6-like
XLOC_003080	XP_021654503.1cucumber peeling cupredoxin-like
XLOC_003118	XP_009345677.1 F-box protein At5g07610-like
XLOC_003190	RVW14708.1Retrovirus-related Pol polyprotein from transposon RE1
XLOC_003316	XP_004235837.1coiled-coil domain-containing protein SCD2 isoform X1
XLOC_003321	XP_027122790.1ATP-dependent Clp protease ATP-binding subunit ClpA homolog CD4B, chloroplastic
XLOC_003352	XP_011088542.1amidophosphoribosyltransferase, chloroplastic
XLOC_003409	PSS34558.1Sulfate transporter 4.1 like
XLOC_003454	XP_010262549.1 cyclin-dependent protein kinase inhibitor SMR2
XLOC_003533	XP_016496864.1 lysine histidine transporter 1-like
XLOC_004003	PSS11456.1Hydroxymethylglutaryl-CoA synthase
XLOC_004108	XP_021623295.1glycine--tRNA ligase, mitochondrial 1
XLOC_004111	XP_027098555.1glycine--tRNA ligase, mitochondrial 1-like
XLOC_004112	---NA---
XLOC_004211	AXC43360.1terpene synthase 7
XLOC_004278	PSS19208.1CBS domain-containing protein
XLOC_004396	XP_010276803.1 probable xyloglucan endotransglucosylase/hydrolase protein 30
XLOC_004675	---NA---
XLOC_004706	AGA84516.1omega-3 fatty acid desaturase
XLOC_004765	XP_018830082.1 desiccation protectant protein Lea14 homolog
XLOC_004805	RVW43121.150S ribosomal protein L25
XLOC_004850	XP_023894877.1receptor-like serine/threonine-protein kinase SD1-8
XLOC_004858	AJO70153.1invertase 3
XLOC_005010	PSR94838.1U3 small nucleolar RNA-associated protein
XLOC_005111	PSS24204.1Jasmonic acid-amido synthetase
XLOC_005152	XP_002285711.1 esterase AGAP003155
XLOC_005353	PSS29312.1D-3-phosphoglycerate dehydrogenase
XLOC_005358	PSR85426.1RNA-binding protein like
XLOC_005430	XP_021684687.1methyltransferase-like protein 13
XLOC_005679	XP_017251269.1 protein DETOXIFICATION 49
XLOC_005704	---NA---
XLOC_005727	PSR96944.1Glutamate--tRNA ligase
XLOC_005996	PSR91360.1Protein root UVB sensitive 1 like
XLOC_006053	PSR93305.1F-box protein
XLOC_006183	PSR95984.1Chaperone protein like
XLOC_006440	GAV72335.1GCK domain-containing protein
XLOC_006591	EOX92070.1Alpha/beta-Hydrolases superfamily protein isoform 1
XLOC_006696	PSS06425.1Protein SLOW WALKER like
XLOC_006910	PSS13585.1Carbonic anhydrase
XLOC_006959	XP_010655280.1 probable mitochondrial adenine nucleotide transporter BTL1 isoform X2
XLOC_007091	PSS09957.1Glycerol-3-phosphate dehydrogenase
XLOC_007111	---NA---
XLOC_007247	PSS24680.1ADP-ribosylation factor GTPase-activating protein AGD5
XLOC_007276	XP_017981847.1 microsomal glutathione S-transferase 3
XLOC_007483	OTG20831.1putative elongation factor 1-alpha
XLOC_007492	PSR96314.1Calcium/calmodulin-regulated receptor-like kinase
XLOC_007692	XP_010057478.1 internal alternative NAD(P)H-ubiquinone oxidoreductase A2, mitochondrial
XLOC_007845	PSS02983.1U-box domain-containing protein
XLOC_007863	PSS04697.1Lactoylglutathione lyase
XLOC_007956	PSS00281.1Eukaryotic translation initiation factor 3 subunit J-A like
XLOC_008052	PSS19121.1B-box zinc finger protein
XLOC_008073	PSS33376.1Caffeoylshikimate esterase
XLOC_008130	PSS02835.1TRNA (guanine(10)-N2)-methyltransferase
XLOC_008157	PSR87739.1Methylesterase 11 precursor
XLOC_008350	PSS10162.1Phosphoglycerate mutase-like protein
XLOC_008401	XP_009355766.1 ASC1-like protein
XLOC_008600	---NA---
XLOC_008691	XP_008234164.1 probable RNA-binding protein EIF1AD
XLOC_008692	PSS24516.12-isopropylmalate synthase
XLOC_008713	XP_019054622.1 endochitinase EP3-like
XLOC_008720	PSS26161.1A-agglutinin anchorage subunit like
XLOC_008871	PSR93389.1Receptor-like serine/threonine-protein kinase
XLOC_009007	PSS11729.1Ankyrin repeat domain-containing protein
XLOC_009025	PSS21691.1Natterin-3 like
XLOC_009301	RVW37260.1G-type lectin S-receptor-like serine/threonine-protein kinase
XLOC_009420	XP_012071932.1serine/threonine-protein kinase HT1
XLOC_009456	PSR90929.1Aldo-keto reductase family 4 member like
XLOC_009505	PSS04759.1Actin cytoskeleton-regulatory complex protein
XLOC_009516	PSR98892.1LysM domain receptor-like kinase
XLOC_009709	XP_011094896.1L-type lectin-domain containing receptor kinase S.4
XLOC_009849	PSS11311.1RING-H2 finger protein like
XLOC_009934	PSS12090.1Protein bicaudal C 1-A like
XLOC_009970	XP_019155151.1 14.7 kDa heat shock protein
XLOC_010278	AYA60132.1GABA transporter 2
XLOC_010402	PSR99879.1Monoacylglycerol lipase
XLOC_010604	PSR96421.1Glutathione S-transferase
XLOC_010781	PSS32589.1ATP-dependent 6-phosphofructokinase
XLOC_010988	XP_008235179.1 CTP synthase
XLOC_011160	XP_010552673.1 60S ribosomal protein L27a-3
XLOC_011246	---NA---
XLOC_011523	NP_565136.1poly polymerase
XLOC_011625	PSS24693.1External alternative NAD(P)H-ubiquinone oxidoreductase
XLOC_011741	---NA---
XLOC_011787	PSS33293.1Proline transporter like
XLOC_011848	ALO19887.1UDP-glycosyltransferase 72B23
XLOC_011882	PSS04186.1BTB/POZ domain-containing protein
XLOC_011938	PSR88352.1Protein kinase
XLOC_012008	PSS31250.1Elongation factor G like
XLOC_012268	XP_023876801.1tricyclene synthase EBOS, chloroplastic-like isoform X2
XLOC_012320	XP_027111885.1adenylate-forming reductase 03009
XLOC_012446	PSR85974.1Ethylene response sensor like
XLOC_012550	---NA---
XLOC_012663	PSR94964.1Cytochrome b561 and DOMON domain-containing protein
XLOC_012794	PSR91099.1WD repeat and HMG-box DNA-binding protein like
XLOC_012874	PSS14536.1Copper-transporting ATPase
XLOC_012900	PSR86242.1Pathogenesis-related transcriptional activator like
XLOC_013077	AHD25653.1neutral invertase 2 (chloroplast)
XLOC_013219	XP_018826496.1 pentatricopeptide repeat-containing protein At4g36680, mitochondrial
XLOC_013241	XP_017237577.1 protein DA1-related 2 isoform X3
XLOC_013258	PSS07511.1Palmitoyl-monogalactosyldiacylglycerol delta-7 desaturase
XLOC_013280	PSS33843.1VAN3-binding protein
XLOC_013303	PIN22885.1Ketol-acid reductoisomerase
XLOC_013651	PSR89330.1Mitochondrial import inner membrane translocase subunit TIM17-2 like
XLOC_013825	PSR98642.1FMN-dependent NADH-azoreductase
XLOC_013832	PSR91159.1Caffeoylshikimate esterase
XLOC_013903	---NA---
XLOC_013923	PSS35320.1Mitochondrial phosphate carrier protein like
XLOC_014137	---NA---
XLOC_014251	---NA---
XLOC_014294	PSR88425.1Protein ENHANCED DISEASE RESISTANCE like
XLOC_014400	PSS26728.1Sec-independent protein translocase protein like
XLOC_014403	PSR99538.1L-ascorbate oxidase
XLOC_014436	XP_019426773.1 D-3-phosphoglycerate dehydrogenase 2, chloroplastic-like
XLOC_014594	---NA---
XLOC_014612	AZN25267.1hydroxycinnamoyl transferase
XLOC_014613	AZN25267.1hydroxycinnamoyl transferase
XLOC_014735	XP_027083678.1TMV resistance protein N-like
XLOC_014764	PSR87755.1Calcium/calmodulin-regulated receptor-like kinase
XLOC_014822	XP_002277934.1 GDSL esterase/lipase At5g55050
XLOC_014897	PHT45742.160S ribosomal protein L18a
XLOC_014975	PSR84589.1LRR receptor-like serine/threonine-protein kinase
XLOC_015036	PSS13438.1Leaf rust 10 disease-resistance locus receptor-like protein kinase
XLOC_015077	PSS03025.1Rapid alkalinization factor like
XLOC_015082	XP_002278325.1 G patch domain-containing protein 4 isoform X2
XLOC_015222	---NA---
XLOC_015233	PSS36326.1Coronin-2A like
XLOC_015475	XP_002274350.1 transcription factor MYB1R1
XLOC_015484	PSS10220.1MACPF domain-containing protein
XLOC_015538	AAS91565.1caffeoyl-CoA O-methyltransferase
XLOC_015568	PSR84546.1(-)-alpha-terpineol synthase
XLOC_015698	PSS29073.1Stress-related protein
XLOC_015703	XP_021616936.1hexose carrier protein HEX6
XLOC_015758	PSS23624.1Pistil-specific extensin-like protein
XLOC_015900	PSR99753.1Patatin-like protein
XLOC_016162	XP_023872335.1UDP-glycosyltransferase 73C6-like
XLOC_016422	PSR90032.1Protein UPSTREAM OF FLC like
XLOC_016601	XP_010661124.1 probable galacturonosyltransferase 14 isoform X2
XLOC_016622	PSS24635.1Serine/threonine-protein kinase
XLOC_016872	PSS01361.1Diphthamide biosynthesis protein
XLOC_016898	PSS01482.1E3 ubiquitin-protein like
XLOC_016962	---NA---
XLOC_016963	---NA---
XLOC_017047	PSR85418.1Calcineurin B-like protein 3
XLOC_017246	PSR88254.1Aminodeoxychorismate synthase
XLOC_017283	PSS13503.1ASC1-like protein
XLOC_017350	PSS31210.1L-ascorbate oxidase
XLOC_017380	KVI01086.1Nucleotide-binding, alpha-beta plait
XLOC_017431	AYA60132.1GABA transporter 2
XLOC_017466	XP_027119047.1RPM1-interacting protein 4-like isoform X1
XLOC_017508	PSS14320.1Zinc finger protein like
XLOC_017519	XP_023873498.1probable carboxylesterase 2
XLOC_017549	PSS31596.1Cyclin-D4-1 like
XLOC_017826	PSS04760.1NKAP family protein
XLOC_018092	PSR88045.1Random slug protein
XLOC_018181	---NA---
XLOC_018201	---NA---
XLOC_018370	PSS19230.1Metacaspase-1 like
XLOC_018773	AMQ67885.1 S-adenosyl-L-homocysteine hydrolase
XLOC_018804	PSS26773.1Aspartic proteinase
XLOC_018885	PSS11307.1Thioredoxin domain-containing protein
XLOC_018965	PSS32414.1Transcription factor bHLH126 like
XLOC_019328	AYK03331.1aquaporin protein PIP2-2
XLOC_019332	OMO72506.1hypothetical protein CCACVL1_17750
XLOC_019405	---NA---
XLOC_019623	PSS26124.1Transcription factor like
XLOC_019640	PSR97991.1Growth hormone-releasing hormone receptor like
XLOC_019741	PSS07868.1DnaJ subfamily B member like
XLOC_019826	PSS23932.1Xyloglucan endotransglucosylase/hydrolase
XLOC_019832	PSR85310.1Aspartate carbamoyltransferase
XLOC_019853	XP_023917099.1nudix hydrolase 17, mitochondrial-like
XLOC_019930	PSR92817.1Inositol phosphorylceramide glucuronosyltransferase
XLOC_020074	PSS26341.1Digalactosyldiacylglycerol synthase
XLOC_020309	PSR91758.150S ribosomal protein
XLOC_020501	PSS09858.1Aldo-keto reductase family 4 member like
XLOC_020597	PSS30161.1Lysine histidine transporter like
XLOC_020604	PSS30161.1Lysine histidine transporter like
XLOC_020727	PSS15501.1IQ domain-containing protein
XLOC_020841	PSS33134.1Transcription factor bHLH120 like
XLOC_020850	PSS28684.1Inactive receptor kinase
XLOC_020948	PSS07269.1Tyrosine-sulfated glycopeptide receptor like
XLOC_021053	---NA---
XLOC_021239	PSS32414.1Transcription factor bHLH126 like
XLOC_021432	PSR86076.1Ribosome biogenesis protein
XLOC_021596	KZV31357.1acetyl-CoA acetyltransferase, cytosolic 1
XLOC_021705	XP_010271907.1 eukaryotic translation initiation factor 3 subunit J-like
XLOC_021723	XP_011091369.1ammonium transporter 1 member 1-like
XLOC_021781	XP_010263488.1 caffeoyl-CoA O-methyltransferase
XLOC_021847	AKJ86992.1flavonoid 3'-hydroxylase 1
XLOC_021859	XP_023872335.1UDP-glycosyltransferase 73C6-like
XLOC_022019	XP_010664783.1 scopoletin glucosyltransferase-like
XLOC_022118	PSS23714.1E3 ubiquitin-protein like
XLOC_022420	PSS26566.1ABC transporter G family member 11 like
XLOC_022650	POO01968.1Ribonuclease Y
XLOC_022765	PSS20851.1Ethylene-responsive transcription factor TINY like
XLOC_022858	---NA---
XLOC_022864	---NA---
XLOC_022953	PSR85210.1Ribosomal L1 domain-containing protein
XLOC_022974	---NA---
XLOC_023061	XP_002273186.2 phytosulfokine receptor 1
XLOC_023172	XP_010264762.1 peptide methionine sulfoxide reductase-like isoform X2
XLOC_023362	PSS02572.1RING finger protein
XLOC_023427	PSS02770.1Protein EXORDIUM-like
XLOC_023445	---NA---
XLOC_023446	PSR86839.1Cytochrome c-type biogenesis protein like
XLOC_023502	PSR89823.1Berberine bridge enzyme-like
XLOC_023517	PSS17574.1Ankyrin repeat-containing protein
XLOC_023583	XP_027107933.1ribosomal RNA small subunit methyltransferase-like
XLOC_023595	PSS04546.1ATPase family AAA domain-containing protein
XLOC_023756	PSS18968.1Transcription factor bHLH147 like
XLOC_023781	PSS26480.1Peptide chain release factor 2 like
XLOC_023985	PON48326.1tubulin-tyrosine ligase
XLOC_024234	RDX92838.1Ribonuclease 3
XLOC_024327	PSS19334.1Ankyrin repeat-containing protein
XLOC_024345	PSS26623.1hypothetical protein CEY00_Acc08038
XLOC_024483	PSR96789.1Ubiquitin-conjugating enzyme like
XLOC_024596	PSS04868.1Serine/threonine-protein kinase
XLOC_024820	XP_011091369.1ammonium transporter 1 member 1-like
XLOC_024989	PSR99661.1Dihydroflavonol 4-reductase
XLOC_024994	PSS31339.1LRR receptor-like serine/threonine-protein kinase precursor
XLOC_025062	PSR99736.1Thiol:disulfide interchange protein like
XLOC_025079	XP_024029681.1transcription factor bHLH120 isoform X2
XLOC_025124	BAO51835.1UDP-glycosyltransferase 94P1
XLOC_025132	XP_017254236.1 calcium-binding mitochondrial carrier protein SCaMC-2-B-like isoform X2
XLOC_025141	XP_016754061.1 probable LRR receptor-like serine/threonine-protein kinase At2g24230
XLOC_025327	XP_015895297.16-phosphogluconate dehydrogenase, decarboxylating 3
XLOC_025604	PSS11159.1EIN3-binding F-box protein
XLOC_026039	EOY17547.1DYNAMIN-like 1E
XLOC_026069	XP_016686480.1 ubiquitin-conjugating enzyme E2 10-like
XLOC_026401	AHI54570.1glutathione S-transferase
XLOC_026836	PSR98069.1Reticulocyte-binding protein 2 a like
XLOC_027012	XP_011080642.1ubiquitin-conjugating enzyme E2-17 kDa
XLOC_027127	XP_006429432.1mitochondrial succinate-fumarate transporter 1
XLOC_027245	---NA---
XLOC_027276	XP_015901269.1serine/threonine-protein phosphatase PP-X isozyme 2
XLOC_027346	PSR93628.1Fatty-acid-binding protein
XLOC_027357	---NA---
XLOC_027544	XP_018805191.1 ASC1-like protein isoform X1
XLOC_027555	XP_009620301.1 ylmG homolog protein 1-2, chloroplastic-like
XLOC_027713	PSR95972.1ATP-dependent Clp protease ATP-binding subunit ClpA CD4B like
XLOC_027804	---NA---
XLOC_027806	---NA---
XLOC_027822	---NA---
XLOC_028208	XP_009767928.1 uncharacterized endoplasmic reticulum membrane protein C16E8.02-like
XLOC_028331	PSR96843.1Aspartate aminotransferase
XLOC_028566	PSS26029.1Purple acid phosphatase
XLOC_028686	PSS07593.1Chaperone protein like
XLOC_028742	PSS01339.1Phosphate permease
XLOC_028919	PSR95555.1Mitochondrial import inner membrane translocase
XLOC_029146	PSS35873.1Glutathione peroxidase
XLOC_029429	XP_023884559.1NAC domain-containing protein 90-like
XLOC_029462	RVW38579.1putative ribonuclease H protein
XLOC_029482	PSR86401.1DENN domain-containing protein
XLOC_029849	PSS24430.1Cytokinin dehydrogenase
XLOC_030442	PSS35096.1Solute carrier family 25 member like
XLOC_030567	PSR98560.1Internal alternative NAD(P)H-ubiquinone oxidoreductase
XLOC_030751	XP_010251572.1 F-box/kelch-repeat protein At3g61590-like
XLOC_030753	OVA00275.1Semialdehyde dehydrogenase
XLOC_030960	PSR95578.1Glyceraldehyde-3-phosphate dehydrogenase
XLOC_030975	PSS09858.1Aldo-keto reductase family 4 member like
XLOC_031079	PSS05796.1Beta-1,3-N-acetylglucosaminyltransferase lunatic fringe like
XLOC_031166	PSS13884.1Calmodulin-binding receptor-like cytoplasmic kinase 3
XLOC_031290	PSS36054.1F-box protein
XLOC_031324	PSS01139.1Acyl-protein like
XLOC_031597	PSS11338.1Ethylene-responsive transcription factor
XLOC_031744	PSS11307.1Thioredoxin domain-containing protein
XLOC_031773	ABF47291.2ATP sulfurylase
XLOC_031986	PSR92473.1Protein like
XLOC_031989	---NA---
XLOC_032052	PSS24486.1Sirohydrochlorin ferrochelatase
XLOC_032249	XP_012073952.1peroxidase 12
XLOC_032251	XP_012073952.1peroxidase 12
XLOC_032300	XP_018815535.1 RING-H2 finger protein ATL22-like
XLOC_032335	XP_002883301.1clavaminate synthase-like protein At3g21360
XLOC_032438	PSR91653.1Pyruvate kinase isozyme G like
XLOC_032466	PSS09876.1Protein like
XLOC_032528	BBA18085.112-oxophytodienoic acid reductase 1
XLOC_032583	PSS19927.1N-succinyldiaminopimelate aminotransferase DapC
XLOC_032912	PSR99736.1Thiol:disulfide interchange protein like
XLOC_033008	PSR99991.1Ethylene-responsive transcription factor RAP2-4 like
XLOC_033233	PSS17404.1Transcription termination factor like
XLOC_033366	PSS16460.1Ketol-acid reductoisomerase
XLOC_033371	PSS16459.1Transcription factor bHLH30 like
XLOC_033427	XP_009758006.1 hyoscyamine 6-dioxygenase-like
XLOC_033554	PSS09766.1hypothetical protein CEY00_Acc12681
XLOC_033792	XP_017255675.1 heavy metal-associated isoprenylated plant protein 3-like
XLOC_033794	XP_009622354.1 40S ribosomal protein S10-1-like
XLOC_033859	PSR93306.1F-box protein
XLOC_033915	PSS04745.1Disease resistance RPP13-like protein
XLOC_033954	PSS05732.1Clathrin light chain like
XLOC_033993	PSR86076.1Ribosome biogenesis protein
XLOC_034098	XP_011033883.1 cyclin-U2-2-like
XLOC_034197	PSR98769.1ATP-dependent RNA helicase
XLOC_034301	---NA---
XLOC_034319	XP_022883267.1transcription factor RAX2-like
XLOC_034339	PSR98553.1Mucin-4 beta chain like
XLOC_034442	XP_011070023.1LRR receptor kinase BAK1
XLOC_034485	PKA46515.1integrator complex subunit 11
XLOC_034624	XP_010248628.1 60S ribosomal protein L27a-3-like
XLOC_034682	XP_002284869.3 subtilisin-like protease SBT1.9
XLOC_034715	PSS00201.1DnaJ subfamily C member 2, N-terminally processed like
XLOC_034802	RVW21501.1Transposon Ty3-I Gag-Pol polyprotein
XLOC_034811	PSS30830.1U-box domain-containing protein
XLOC_035111	XP_023872335.1UDP-glycosyltransferase 73C6-like
XLOC_035148	OMO88105.1Glycosyl transferase, family 14
XLOC_035277	XP_021296966.1serine/threonine-protein kinase AtPK2/AtPK19-like
XLOC_035368	PSS09838.1L-rhamnose-proton symporter like
XLOC_035529	GAV58921.1UDPGT domain-containing protein
XLOC_035661	PSS17781.1Potassium channel like
XLOC_035691	PSS14117.1Serine/threonine-protein kinase
XLOC_035739	XP_011087901.17-deoxyloganetin glucosyltransferase-like
XLOC_035763	XP_009761175.1 SNAP25 homologous protein SNAP33
XLOC_035778	PSS11506.1Auxin-responsive protein
XLOC_035785	XP_010658410.1 patatin-like protein 6
XLOC_035865	PSS09978.1Cytochrome b5 domain-containing protein
XLOC_036008	PSS15609.1Serine incorporator
XLOC_036030	XP_018807540.1 scopoletin glucosyltransferase-like
XLOC_036166	PSS34991.1TGACG-sequence-specific DNA-binding protein like
XLOC_036181	XP_010113410.1salicylate carboxymethyltransferase
XLOC_036275	---NA---
XLOC_036411	XP_019459165.1 mitochondrial import inner membrane translocase subunit TIM14-1-like
XLOC_036549	PSR98480.1Threonine dehydratase
XLOC_036633	PSS17495.1ATP-binding cassette sub-family A member like
XLOC_037017	PSR93148.1Protein DA1-related like
XLOC_037176	PSR93200.1ABC1 protein precursor
XLOC_037355	PSS07374.1IAA-amino acid hydrolase ILR1-like
XLOC_037666	AMJ52091.1heat shock cognate 70 kDa protein 2-like protein
XLOC_037781	PSR97991.1Growth hormone-releasing hormone receptor like
XLOC_037791	PSS33355.1Legume lectin domain protein
XLOC_037989	XP_018852497.1 signal peptide peptidase-like 2
XLOC_038226	PSR96315.1Organic cation/carnitine transporter like
XLOC_038458	XP_021634685.1RING-H2 finger protein ATL40-like
XLOC_038592	PWA96138.1AAA+ ATPase domain-containing protein
XLOC_038609	PSS04141.1RHOMBOID-like protein
XLOC_038854	XP_015876939.1aquaporin TIP1-3
XLOC_038958	XP_011096560.1gibberellin 2-beta-dioxygenase
XLOC_039185	XP_022854091.1probable trehalase isoform X1
XLOC_039214	PSS16099.1Cytochrome b561 and DOMON domain-containing protein
XLOC_039463	PSR90193.1Chaperonin-like RbcX protein
XLOC_039490	PSR98034.1Zinc finger A20 and AN1 domain-containing stress-associated protein
XLOC_039646	PSS32677.1BAHD acyltransferase
XLOC_040148	PON58438.1hypothetical protein PanWU01x14_166500
XLOC_040414	XP_002279066.3 calmodulin-4
XLOC_040471	PSS13571.1Nucleolar GTP-binding protein
XLOC_040514	AAS91565.1caffeoyl-CoA O-methyltransferase
XLOC_040576	XP_002273649.1 NAC domain-containing protein 83
XLOC_040596	XP_017970720.1 ethylene-responsive transcription factor ERF034
XLOC_040669	EOX95597.1 UvrABC system protein C
XLOC_040843	PSS04425.1Ethylene-responsive transcription factor
XLOC_040920	PSR87958.1Small RNA degrading nuclease
XLOC_040983	XP_027069137.1DNA topoisomerase 6 subunit A
XLOC_041129	PSS24408.1CCR4-associated factor 1 like
XLOC_041267	XP_008224320.1 5'-nucleotidase SurE
XLOC_041340	RVX08075.1Lactoylglutathione lyase
XLOC_041342	XP_027085705.15'-adenylylsulfate reductase 3, chloroplastic-like
XLOC_041378	XP_003635452.2 probable amino-acid acetyltransferase NAGS1, chloroplastic isoform X1
XLOC_041619	PSS17314.1Urease accessory protein like
XLOC_041620	PSR89439.1Auxin-responsive protein
XLOC_041645	PSS07870.1Protein NRT1/ PTR FAMILY 2.11 like
XLOC_041715	XP_023916918.1cytochrome c isoform X1
XLOC_041735	PSS31654.12,3-bisphosphoglycerate-dependent phosphoglycerate mutase
XLOC_041931	PSS08141.1Protein ABHD17C like
XLOC_041953	RVW55067.1Glutamate receptor 3.6
XLOC_041976	PSS09748.1AT-hook motif nuclear-localized protein
XLOC_042028	XP_004237969.1esterase CG5412 isoform X3
XLOC_042065	PSS04494.1Polyadenylate-binding protein
XLOC_042160	PSS11817.1Peptidyl-prolyl cis-trans isomerase
XLOC_042236	PSS26366.1Auxin-responsive protein
XLOC_042313	---NA---
XLOC_042380	PSS21500.1Protein SENSITIVE TO PROTON RHIZOTOXICITY like
XLOC_042442	PSS31790.1Fluoride export protein
XLOC_042547	PSR95222.1Protein UPSTREAM OF FLC like
XLOC_042777	PSS26705.1Pre-rRNA-processing protein
XLOC_043095	PSR87670.1DEAD-box ATP-dependent RNA helicase
XLOC_043139	---NA---
XLOC_043184	XP_008343134.1 60S ribosomal protein L22-2-like
XLOC_043186	XP_022137813.1eukaryotic translation initiation factor 2 subunit gamma-like
XLOC_043373	PSS05951.1Tyrosine-protein like
XLOC_043375	AEM62884.1ACC oxidase 5
XLOC_043384	PSS17879.1WD repeat-containing protein
XLOC_043720	PSR88193.1D-aminoacyl-tRNA deacylase
XLOC_043730	PON55209.1Isopentenyl-diphosphate delta-isomerase, type
XLOC_043733	PON55209.1Isopentenyl-diphosphate delta-isomerase, type
XLOC_043815	PSS28976.1P21-activated protein kinase-interacting protein
XLOC_043844	PSS35808.1Serine/threonine-protein kinase
XLOC_043992	PSR84980.1Biosynthetic arginine decarboxylase
XLOC_044040	XP_010272980.1 39S ribosomal protein L41-A, mitochondrial-like
XLOC_044114	ALO19894.1UDP-glycosyltransferase 75L14
XLOC_044292	PSS24326.1E3 ubiquitin-protein like
XLOC_044389	PSS36518.1Lipid-phosphate phosphatase
XLOC_044713	AJW67229.1NADPH-cytochrome P450 reductase
XLOC_044724	RWR94185.1Ribosomal protein S4e
XLOC_044767	PSS24685.1Sphingosine kinase
XLOC_044804	PSR89177.1Protein TolB like
XLOC_044973	PSS28523.1Protein DETOXIFICATION like
XLOC_045012	PSS18249.1Coiled-coil domain-containing protein
XLOC_045013	XP_002275779.1 aspartokinase 2, chloroplastic isoform X2
XLOC_045068	PSS30135.1WEB family protein
XLOC_045097	PSS11364.1Protein LURP-one-related like
XLOC_045108	PSS14416.1Ubiquitin fusion degradation protein
XLOC_045141	XP_002274108.2 major allergen Pru ar 1
XLOC_045292	PSS15885.1Anion exchange protein like
XLOC_045369	PSS24685.1Sphingosine kinase
XLOC_045496	PSS10317.1G-type lectin S-receptor-like serine/threonine-protein kinase
XLOC_045690	XP_023894986.1putative receptor-like protein kinase At4g00960 isoform X6
XLOC_045751	PSR98892.1LysM domain receptor-like kinase
XLOC_045757	PSS36498.1Jasmonate O-methyltransferase
XLOC_045815	PSS09653.1RPM1-interacting protein
XLOC_045917	RVX10029.1Transmembrane protein 8B
XLOC_046022	---NA---
XLOC_046064	XP_010250225.1 putative clathrin assembly protein At5g35200
XLOC_046092	PSS01105.1HSP-interacting protein
XLOC_046185	PSS20789.160S ribosomal protein L18a-like protein
XLOC_046270	PSS24387.15-methyltetrahydropteroyltriglutamate--homocysteine methyltransferase
XLOC_046337	PSR98717.1Cationic amino acid transporter like
XLOC_046343	XP_011100122.1UPF0481 protein At3g47200-like
XLOC_046499	PSS11442.1Sugar transport protein
XLOC_046556	PSS04314.1ATP-dependent RNA helicase
XLOC_046656	PSS07593.1Chaperone protein like
XLOC_046766	PSS21130.1Protein like
XLOC_046799	PSS24735.1G-type lectin S-receptor-like serine/threonine-protein kinase precursor
XLOC_046857	XP_015890282.1SUMO-conjugating enzyme SCE1
XLOC_047053	XP_011089652.1cytochrome P450 82C2
XLOC_047057	PSS14104.1G3BP-like protein
XLOC_047073	XP_002272310.1 protein kinase 2A, chloroplastic
XLOC_047093	XP_021644547.1dynamin-related protein 1E isoform X1
XLOC_047196	PSR84486.1Zinc finger CCCH domain-containing protein
XLOC_047205	AAU08174.1phenylalanine ammonia-lyase
XLOC_047349	XP_009797110.1 calcium-binding allergen Ole e 8-like
XLOC_047352	XP_009797110.1 calcium-binding allergen Ole e 8-like
XLOC_047495	PSS24052.1Shewanella-like protein
XLOC_047695	AID55355.1NAC protein 4
XLOC_047851	---NA---
XLOC_047879	PSS33133.1Receptor-like serine/threonine-protein kinase
XLOC_047925	PSR96789.1Ubiquitin-conjugating enzyme like
XLOC_048013	PSS23668.1MLO-like protein
XLOC_048286	PSS01917.1Disease resistance protein like
XLOC_048320	PSS04292.1Calmodulin-binding protein 60 B like

## Sheet: B
125 common elements in "ARS7 G2", "ARS7 R4", "ARS1 G1" and "ARS1 R3":
XLOC_001308	PSS30511.1Ninja-family protein
XLOC_002437	---NA---
XLOC_002453	PSS29908.1Cytochrome P450 84A1 like
XLOC_002592	PSS30361.1Futsch light chain LC(f) like
XLOC_003022	---NA---
XLOC_003201	XP_027080994.1F-box protein CPR1-like
XLOC_003683	XP_019054007.1 TMV resistance protein N-like
XLOC_003927	AVZ45854.1gibberellin 3-oxidase 3
XLOC_004438	PSS01322.1Oxysterol-binding protein-related protein like
XLOC_004750	---NA---
XLOC_004821	PWA39821.1hypothetical protein CTI12_AA568450
XLOC_005176	PSS32666.1Mitochondrial uncoupling protein
XLOC_005918	PSS12108.1BOI-related E3 ubiquitin-protein ligase
XLOC_006551	---NA---
XLOC_007098	---NA---
XLOC_007429	PSS13430.1Universal stress protein A-like protein
XLOC_007433	XP_027152828.1polygalacturonase At1g48100-like
XLOC_007501	AAD00171.1actinorizal nodulin AgNOD-GHRP
XLOC_007740	PSS28615.1Auxin-responsive protein
XLOC_007744	PSS35781.1NADH--cytochrome b5 reductase
XLOC_008039	KHN27145.1Putative lipid-transfer protein DIR1
XLOC_008045	KHN27145.1Putative lipid-transfer protein DIR1
XLOC_008914	PSR95578.1Glyceraldehyde-3-phosphate dehydrogenase
XLOC_009891	PSS33506.1Beta-D-glucosyl crocetin beta-1,6-glucosyltransferase
XLOC_010064	XP_006469729.1cysteine-rich repeat secretory protein 38
XLOC_010622	PSS16399.1Retrotransposon-derived protein
XLOC_011212	XP_017642013.1 cysteine-rich receptor-like protein kinase 10 isoform X2
XLOC_011420	XP_027098143.1universal stress protein A-like protein
XLOC_011455	PSR89427.1Long chain base biosynthesis protein like
XLOC_012318	XP_018830462.1 U-box domain-containing protein 12-like
XLOC_012843	PSR87917.1Galactomannan galactosyltransferase
XLOC_013027	XP_009596481.1 isoflavone reductase homolog
XLOC_013826	---NA---
XLOC_014092	---NA---
XLOC_014359	XP_021656886.1berberine bridge enzyme-like 17
XLOC_015980	PSR91497.1Phospholipid hydroperoxide glutathione peroxidase
XLOC_016281	PSS04772.1Lipid-phosphate phosphatase
XLOC_016862	PSS01363.1DNA helicase
XLOC_017036	---NA---
XLOC_017672	PSS29450.1BZIP transcription factor
XLOC_017673	PSS29450.1BZIP transcription factor
XLOC_018868	CDY47534.1 BnaC03g69280D
XLOC_019941	PSS21781.1Heterodimeric geranylgeranyl pyrophosphate synthase small subunit like
XLOC_020640	XP_022724255.1protein SRG1-like
XLOC_020713	RVW95459.1Retrovirus-related Pol polyprotein from transposon RE1
XLOC_020794	PSS14105.1ER lumen protein-retaining receptor C28H8.4 like
XLOC_021745	AAD00171.1actinorizal nodulin AgNOD-GHRP
XLOC_022332	XP_015882647.1UDP-glycosyltransferase 74F1-like
XLOC_022353	XP_015882647.1UDP-glycosyltransferase 74F1-like
XLOC_022701	XP_022753107.1probable calcium-binding protein CML29
XLOC_022932	PSS05974.1Serine/threonine-protein kinase
XLOC_023244	BAS68505.1putative glycosyltransferase
XLOC_023355	---NA---
XLOC_023681	RVW30099.1Berberine bridge enzyme-like 14
XLOC_023682	XP_021911175.1berberine bridge enzyme-like 4
XLOC_024642	---NA---
XLOC_025784	PSS36160.1Leucine aminopeptidase
XLOC_027032	PSS30361.1Futsch light chain LC(f) like
XLOC_027353	XP_023928033.1protein SRG1-like
XLOC_027354	PON84995.1Oxoglutarate/iron-dependent dioxygenase
XLOC_027412	PSS11097.1Potassium transporter like
XLOC_027723	XP_027150661.1putative lipase ROG1 isoform X1
XLOC_028231	RVW95423.1Homeobox-leucine zipper protein ATHB-7
XLOC_028246	EOY23675.1SAUR family protein
XLOC_028303	PSS31814.1Receptor-like protein kinase
XLOC_028708	XP_017216198.1 metallothiol transferase FosB-like
XLOC_030126	XP_024162660.1putative disease resistance protein At4g19050
XLOC_030716	PSS14259.1Xyloglucan endotransglucosylase/hydrolase protein
XLOC_031248	AJU57222.1sugar transporter ERD6-like 7
XLOC_031453	PSS02585.1Legume lectin domain protein
XLOC_031587	AZI71050.1pathogenesis-related protein 1
XLOC_031691	PSS08393.1Cytochrome P450 CYP736A12 like
XLOC_032164	PSR88189.1Cytochrome P450 CYP749A22 like
XLOC_032622	---NA---
XLOC_032853	PSS10349.1Bifunctional pectinesterase 18/rRNA N-glycosylase
XLOC_033985	PSS09536.1Cationic peroxidase
XLOC_034598	XP_021652067.1protein ABIL2-like
XLOC_034739	PSR92888.1Ethylene receptor like
XLOC_035376	PSS33139.1Fructokinase-7 like
XLOC_035431	---NA---
XLOC_035627	PSS31380.1Cytochrome P450 82A3 like
XLOC_035628	PSS31380.1Cytochrome P450 82A3 like
XLOC_035688	XP_027359081.1heavy metal-associated isoprenylated plant protein 39-like
XLOC_036450	PSS04772.1Lipid-phosphate phosphatase
XLOC_036499	XP_027335303.1cationic peroxidase 1-like
XLOC_036911	PSS30079.1Isocitrate dehydrogenase NADP-dependent
XLOC_036937	EOY23877.1Endoglucanase 1
XLOC_036942	EOY23877.1Endoglucanase 1
XLOC_038217	RVX17910.1Transcription factor bHLH137
XLOC_038444	XP_027061604.1basic salivary proline-rich protein 4-like
XLOC_038782	PSR99783.1Subtilisin-like protease
XLOC_038972	XP_024438433.1protein WVD2-like 3 isoform X1
XLOC_039039	XP_008232626.1 TMV resistance protein N-like
XLOC_039143	PSR98836.1Tyrosine protein-kinase
XLOC_039558	XP_010261826.1 aldehyde dehydrogenase family 7 member A1
XLOC_039649	PSR96483.1Myb family transcription factor
XLOC_039785	AMJ39506.1aldehyde dehydrogenase 2B7 copy 2
XLOC_040220	PSS21733.1Dirigent protein
XLOC_040584	PSS11207.1Cellulose synthase-like protein
XLOC_041277	PSS02585.1Legume lectin domain protein
XLOC_042146	PSS32740.1U-box domain-containing protein
XLOC_042733	PSR88395.1Ureide permease
XLOC_043583	XP_012080011.1probable LRR receptor-like serine/threonine-protein kinase At4g26540
XLOC_043746	PSS06394.1Glutathione peroxidase
XLOC_044031	XP_010260769.1 organic cation/carnitine transporter 3-like
XLOC_044552	---NA---
XLOC_044692	PSS31281.1Cytochrome P450 83B1 like
XLOC_044833	PSR99850.1Transcription factor bHLH96 like
XLOC_045177	XP_011076196.1ADP-ribosylation factor-related protein 1
XLOC_045404	PSS31250.1Elongation factor G like
XLOC_046215	PSS31445.1Ethylene-responsive transcription factor RAP2-10 like
XLOC_046249	XP_010052817.1 MYB-like transcription factor ETC1
XLOC_046395	---NA---
XLOC_046662	XP_011093901.1probable pectinesterase/pectinesterase inhibitor 12
XLOC_046794	XP_002279679.1 probable calcium-binding protein CML23
XLOC_047615	ATC41984.1transcription factor MYB5d
XLOC_048072	PSS19261.1Serine carboxypeptidase-like
XLOC_048188	RWR96221.1plasma membrane-associated cation-binding protein 1
XLOC_000344	XP_009366205.1 heat shock 70 kDa protein
XLOC_013249	XP_006491502.1glucan endo-1,3-beta-glucosidase, basic isoform-like
XLOC_013250	PSS01772.1Glucan endo-1,3-beta-glucosidase
XLOC_014110	BAF95876.1beta 1-3 glucanase
XLOC_016414	AYP70925.1polygalacturonase 1
XLOC_033285	PSS19549.1Biotin carboxylase
XLOC_044035	PSS19764.1Uclacyanin-3 like

## Sheet: C
563 common elements in "ARS7 G3", "ARS7 R2", "ARS1 G3" and "ARS1 R1":
XLOC_021307	XP_022898230.1uncharacterized protein LOC111411833
XLOC_029901	PSR91305.1Pollen-specific protein
XLOC_048094	PSS19920.1WAT1-related protein
XLOC_000047	BAJ53150.1 JHL23J11.5
XLOC_000185	XP_002265088.1 UDP-glucuronate 4-epimerase 6
XLOC_000315	PSS14338.1Fasciclin-like arabinogalactan protein
XLOC_000332	PSS25959.1GDSL esterase/lipase
XLOC_000335	PSS13958.1Cellulose synthase A catalytic subunit 7 [UDP-forming] like
XLOC_000352	XP_024987282.1ethylene-responsive transcription factor WRI1-like
XLOC_000467	PSR90163.1Ubiquitin-conjugating enzyme like
XLOC_000615	PSR88187.1Cell migration-inducing and hyaluronan-binding protein
XLOC_000629	PSR91217.1Protein MIZU-KUSSEI like
XLOC_000681	XP_002276636.1 mitochondrial outer membrane protein porin of 36 kDa
XLOC_000687	PSS17950.1GATA transcription factor
XLOC_000688	PSS17950.1GATA transcription factor
XLOC_000699	PSS01327.1Taraxerol synthase
XLOC_000701	---NA---
XLOC_000901	XP_002298233.1aquaporin TIP2-1
XLOC_001086	XP_022896469.1non-specific lipid-transfer protein A-like
XLOC_001161	PSS21517.1Sulfate transporter 2.1 like
XLOC_001240	XP_010656838.1 afadin- and alpha-actinin-binding protein isoform X3
XLOC_001395	XP_019231530.1 UDP-glycosyltransferase 73C1-like
XLOC_001398	XP_019231530.1 UDP-glycosyltransferase 73C1-like
XLOC_001417	XP_019053282.1 subtilisin-like protease SBT4.3 isoform X1
XLOC_001808	XP_023911785.1transcription factor RAX2-like
XLOC_001874	PSR91871.1U-box domain-containing protein
XLOC_002189	XP_022889815.1non-specific lipid-transfer protein 2-like
XLOC_002234	AFO84093.1ADP glucose pyrophosphorylase
XLOC_002399	PSS20817.1Deoxyhypusine synthase
XLOC_002464	PSS20817.1Deoxyhypusine synthase
XLOC_002530	RVW22448.1Protein detoxification 45, chloroplastic
XLOC_002628	XP_002531135.1peroxidase 64
XLOC_002877	PSR84982.1SKI/DACH domain-containing protein
XLOC_002966	PSR99639.1Cysteine protease RD21B precursor
XLOC_002967	XP_013621501.1 cysteine proteinase RD21a-like
XLOC_003017	PSS36469.1ATP-dependent DNA helicase
XLOC_003156	PSR98357.1Pectate lyase
XLOC_003157	PSR98357.1Pectate lyase
XLOC_003163	PSS04143.1Scopoletin glucosyltransferase
XLOC_003225	PSS32675.1Laccase-4 like
XLOC_003317	PSR89421.1Serine carboxypeptidase-like
XLOC_003411	NP_001291341.1glutathione S-transferase DHAR2-like
XLOC_003427	PSR92904.1Protein WVD2-like
XLOC_003622	PSR96122.1Kinesin-like protein
XLOC_003626	PSR96862.1Colossin-B like
XLOC_003657	XP_003634471.1 pollen-specific protein C13
XLOC_003732	XP_010253626.1 fasciclin-like arabinogalactan protein 11
XLOC_003735	PSR92849.1Fasciclin-like arabinogalactan protein
XLOC_003737	PSR98176.1Fasciclin-like arabinogalactan protein
XLOC_003738	XP_003521385.1fasciclin-like arabinogalactan protein 11
XLOC_003930	PSR91810.1ABC transporter G family member 32 like
XLOC_004086	PSS26959.1Microtubule-associated protein
XLOC_004134	PSS35113.1Transcription factor like
XLOC_004136	PSS13597.1SPX domain-containing membrane protein
XLOC_004193	---NA---
XLOC_004198	PIN02786.1Anaphase promoting complex, Cdc20, Cdh1, and Ama1 subunits
XLOC_004292	PSS26026.1DNA replication licensing factor like
XLOC_004311	PSR98176.1Fasciclin-like arabinogalactan protein
XLOC_004313	XP_010253626.1 fasciclin-like arabinogalactan protein 11
XLOC_004360	PSS16114.1GDSL esterase/lipase
XLOC_004375	XP_011041759.1 probable inactive receptor kinase At5g58300 isoform X1
XLOC_004472	---NA---
XLOC_004794	PSS06231.1Glutathione S-transferase
XLOC_004870	XP_027115953.1major allergen Pru ar 1-like
XLOC_004883	XP_027097009.1universal stress protein A-like protein
XLOC_004932	PSR91153.1Universal stress protein A-like protein
XLOC_005127	XP_027148144.1low-temperature-induced cysteine proteinase-like
XLOC_005283	PSS04096.1Extensin like
XLOC_005435	PSR86165.1Vacuolar cation/proton exchanger like
XLOC_005528	PSR99515.1Cyclin-B2-4 like
XLOC_005864	PSR85239.1Anthranilate N-benzoyltransferase protein
XLOC_005937	EOY22822.1Major facilitator superfamily protein
XLOC_005977	PSR92872.1Phosphoenolpyruvate carboxylase
XLOC_006036	PSR93232.1Laccase-12 like
XLOC_006178	XP_018805583.1 proline-rich receptor-like protein kinase PERK1
XLOC_006229	PON68706.1MYB transcription factor
XLOC_006287	XP_022858859.1glutamate decarboxylase
XLOC_006293	XP_023903873.1acyl-CoA-binding protein
XLOC_006308	PSR89874.1Protein transport protein
XLOC_006416	---NA---
XLOC_006450	PSS30038.1Rhamnogalacturonate lyase
XLOC_006462	PSS13602.1Protein trichome birefringence-like
XLOC_006742	PSS01420.1Sulfate transporter 3.1 like
XLOC_006806	PSR86028.1Indole-3-pyruvate monooxygenase YUCCA10
XLOC_006808	PSR86029.1Shikimate dehydrogenase
XLOC_006818	XP_027098070.1 glutaredoxin-C13-like
XLOC_006909	---NA---
XLOC_006916	ADZ28516.1flavonol synthase
XLOC_006925	XP_006341989.1 zingipain-2
XLOC_007034	XP_017626417.1 WAT1-related protein At5g40240-like isoform X1
XLOC_007080	PSS32695.1Protein trichome birefringence-like
XLOC_007167	PSS26048.1Receptor-like serine/threonine-protein kinase
XLOC_007189	PSR98250.1WAT1-related protein
XLOC_007297	AYA60143.1lysine histidine transporter 6
XLOC_007376	XP_021599347.1acyl-CoA-binding protein-like
XLOC_007408	XP_002312395.1protein NIM1-INTERACTING 2
XLOC_007599	XP_018832853.1 protein NIM1-INTERACTING 3-like
XLOC_007624	KRH13009.1hypothetical protein GLYMA_15G210900
XLOC_007712	XP_027074840.1homeobox-leucine zipper protein ATHB-6
XLOC_007852	PSS26788.1Shikimate O-hydroxycinnamoyltransferase
XLOC_007867	---NA---
XLOC_007895	XP_007040424.2 probable inactive receptor kinase At4g23740
XLOC_007948	GAV63623.1zf-C3HC4_2 domain-containing protein
XLOC_008218	XP_024448940.1protein SCARECROW-like
XLOC_008267	PSR89677.1Hornerin like
XLOC_008323	AVZ45861.19-cis-epoxycarotenoid dioxygenase 4
XLOC_008381	PSS13898.1Heparanase-like protein
XLOC_008397	XP_010650007.1 protein WVD2-like 3 isoform X2
XLOC_008402	XP_011078554.1peroxidase 11
XLOC_008403	XP_022734827.1peroxidase 11-like
XLOC_008518	XP_010244040.1 auxin efflux carrier component 6
XLOC_008539	---NA---
XLOC_008786	XP_002285373.1 protein PPLZ02
XLOC_008843	PSS19323.12-hydroxy-6-oxononadienedioate/2-hydroxy-6- oxononatrienedioate hydrolase
XLOC_008848	XP_002280196.1 serine/threonine-protein kinase At5g01020
XLOC_008956	PSS05803.1Septation protein like
XLOC_009037	PSS09949.1Dirigent protein
XLOC_009266	---NA---
XLOC_009278	XP_012073613.1glucan endo-1,3-beta-glucosidase 12
XLOC_009279	XP_002510704.1glucan endo-1,3-beta-glucosidase 12
XLOC_009354	XP_010029316.1 phosphate transporter PHO1 homolog 9
XLOC_009430	XP_006434726.1WUSCHEL-related homeobox 4
XLOC_009436	PSS09477.1Cytochrome P450 86A1 like
XLOC_009444	PSR98292.1Laccase-17 like
XLOC_009543	PSS14281.1Cytochrome b561 domain-containing protein
XLOC_009557	PSS00160.1CAMP-dependent protein kinase, catalytic subunit-like
XLOC_009727	XP_017627365.1 beta-glucuronosyltransferase GlcAT14B
XLOC_009773	PSR98651.1Aquaporin NIP1-1 like
XLOC_009792	---NA---
XLOC_009793	---NA---
XLOC_009818	XP_009353647.1 expansin-A6-like
XLOC_009851	XP_027074820.1sulfite exporter TauE/SafE family protein 3-like
XLOC_009908	PSS28957.1UspA protein
XLOC_009916	RVW86999.1Transmembrane 9 superfamily member 5
XLOC_010021	PSR92954.1Protein trichome birefringence-like
XLOC_010023	XP_012464211.1 protein trichome birefringence-like 36
XLOC_010035	---NA---
XLOC_010125	PSS33192.1PLAT domain-containing protein
XLOC_010212	PSS33923.12-dehydro-3-deoxyphosphooctonate aldolase
XLOC_010277	PQM42550.1high mobility group B protein 6-like
XLOC_010366	PSS24530.1Non-specific lipid-transfer protein like
XLOC_010458	PSS13958.1Cellulose synthase A catalytic subunit 7 [UDP-forming] like
XLOC_010491	PSR89959.1Triose-phosphate transporter domain protein
XLOC_010603	PSS16051.1Kinesin-like protein
XLOC_010620	---NA---
XLOC_010626	---NA---
XLOC_010684	XP_022892486.1protein G1-like1
XLOC_010741	PSS24616.1Receptor-like protein kinase
XLOC_010748	XP_012074684.1cytochrome P450 98A2
XLOC_010853	PSS13872.1TBC1 domain family member 15 like
XLOC_010868	XP_019164537.1 cysteine-rich repeat secretory protein 12
XLOC_010977	PSS04152.1Protein mesh like
XLOC_011094	PSS23647.1ABC transporter B family member 1 like
XLOC_011098	EOY10375.1Uncharacterized protein TCM_025744
XLOC_011382	PSR85012.1GMP synthase
XLOC_011386	XP_002268160.2 probable LRR receptor-like serine/threonine-protein kinase At5g48740
XLOC_011416	XP_010656196.1 probable polyamine oxidase 5
XLOC_011515	PSS01727.1Stomatal closure-related actin-binding protein
XLOC_011576	OMO51548.1Glycoside hydrolase, family 9
XLOC_011611	PSR88000.1L-ascorbate oxidase
XLOC_011772	XP_010645298.1 AP2-like ethylene-responsive transcription factor ANT isoform X2
XLOC_011883	XP_002275806.1 cytochrome P450 86A22
XLOC_011904	XP_012093145.1cyclin-D4-1 isoform X2
XLOC_012036	KEH35466.1 transmembrane protein, putative
XLOC_012050	RVX15253.1putative GMP synthase
XLOC_012100	XP_019225285.1 lactoylglutathione lyase-like
XLOC_012112	PSS19328.1Proline-rich protein
XLOC_012214	PSS02686.1Cyclin-D3-1 like
XLOC_012426	XP_006341989.1 zingipain-2
XLOC_012651	PSR89830.1Receptor-like kinase
XLOC_012656	PSR89440.1Omega-hydroxypalmitate O-feruloyl transferase
XLOC_012737	EOY05529.1 EF-hand calcium-binding domain-containing protein 4A
XLOC_013148	XP_017977751.1 leucine-rich repeat receptor-like protein kinase PXC1
XLOC_013181	PIN11524.1Multidrug/pheromone exporter, ABC superfamily
XLOC_013257	PSS07512.1Phosphatidylcholine:diacylglycerol cholinephosphotransferase
XLOC_013259	PSS07512.1Phosphatidylcholine:diacylglycerol cholinephosphotransferase
XLOC_013383	PSS32562.17-deoxyloganetic acid glucosyltransferase
XLOC_013465	PSS29327.1PI-PLC X domain-containing protein
XLOC_013537	---NA---
XLOC_013581	AFM35695.1nonspecific lipid transfer protein
XLOC_013590	RVX00637.1putative LRR receptor-like serine/threonine-protein kinase IRK
XLOC_013823	PSR98641.1Cellulose synthase A catalytic subunit 8 [UDP-forming] like
XLOC_013886	PSS04152.1Protein mesh like
XLOC_013916	XP_020209037.1protein LIGHT-DEPENDENT SHORT HYPOCOTYLS 2-like
XLOC_013988	PSS06459.1Omega-hydroxypalmitate O-feruloyl transferase
XLOC_014516	PSR91265.1Dehydration-responsive element-binding protein
XLOC_014539	PSS26233.1Protein of unknown function DUF1295 protein
XLOC_014663	PSS29048.1Nucleobase-ascorbate transporter like
XLOC_014727	PSS09642.1Foldase protein like
XLOC_014742	XP_021686607.1non-specific lipid-transfer protein 8-like
XLOC_014744	XP_021686607.1non-specific lipid-transfer protein 8-like
XLOC_014890	XP_010275526.1 beta-galactosidase 3-like
XLOC_015005	PSS21153.1RNA-binding protein like
XLOC_015138	XP_023755838.1peroxidase 63-like
XLOC_015221	XP_022777040.1leucine-rich repeat protein 1-like isoform X2
XLOC_015232	PSS15650.1Serine/threonine-protein kinase
XLOC_015236	XP_002314029.1arabinogalactan peptide 23
XLOC_015262	XP_027075664.1protein TPX2-like
XLOC_015400	PSS02932.1Protein like
XLOC_015532	PIN02806.1Copper chaperone
XLOC_015611	XP_009352736.1 receptor-like protein 51
XLOC_015631	AGI78460.1GDP-D-mannose pyrophosphorylase
XLOC_015676	XP_006583563.1NAC domain-containing protein 75
XLOC_015718	PSR93227.1Protein trichome birefringence-like
XLOC_015730	PSS06421.1Protein like
XLOC_015769	XP_017224220.1 probable peroxygenase 4
XLOC_015784	PSS00498.1Metallothiol transferase
XLOC_015902	XP_004505673.1expansin-like A2
XLOC_015974	PSR91327.1Cytokinin riboside 5'-monophosphate phosphoribohydrolase
XLOC_016114	XP_002263994.1 ethylene-responsive transcription factor ERF023
XLOC_016251	PSS06337.1F-box/LRR-repeat protein
XLOC_016595	PSS15612.1Protein of unknown function DUF538 protein
XLOC_016598	PSS15612.1Protein of unknown function DUF538 protein
XLOC_016764	PSS32716.1Protein trichome birefringence-like
XLOC_016801	AZL56933.1cyclin-dependent kinase B2-2
XLOC_016884	XP_012078100.1protein MARD1
XLOC_017065	XP_009607662.1 protein NRT1/ PTR FAMILY 1.2-like
XLOC_017089	PSS23583.1Alpha carbonic anhydrase
XLOC_017403	XP_010652214.1 probable polygalacturonase
XLOC_017566	PQQ10068.1gibberellin-regulated protein 6-like
XLOC_017582	PSS21745.1Pathogenesis-related protein like
XLOC_017622	PSS34404.1Inactive receptor kinase
XLOC_017724	PSR85360.1RNA-directed RNA polymerase
XLOC_017787	RVW76768.1Protein IQ-domain 31
XLOC_017809	XP_006467819.1sphingolipid delta(4)-desaturase DES1-like
XLOC_017976	AES95659.2transmembrane protein, putative
XLOC_017985	PSS01786.1Protein MIZU-KUSSEI like
XLOC_018016	PSS26556.1Dicarboxylate transporter 2 like
XLOC_018067	RVW17289.1Syntaxin-related protein KNOLLE
XLOC_018084	OMO49336.1Pathogenic type III effector avirulence factor Avr cleavage site
XLOC_018114	PSS24530.1Non-specific lipid-transfer protein like
XLOC_018183	PSS24476.1DNA-damage-repair/toleration protein
XLOC_018331	PSS34905.1Glucomannan 4-beta-mannosyltransferase
XLOC_018388	PSS07764.1ATP-dependent RNA helicase
XLOC_018428	XP_002267239.2 ATP-dependent DNA helicase DDM1
XLOC_018615	PSR99704.11-acyl-sn-glycerol-3-phosphate acyltransferase
XLOC_018762	XP_024047077.1aspartic proteinase isoform X1
XLOC_018763	XP_018826742.1 ethylene-responsive transcription factor WIN1-like
XLOC_019115	PSS23910.1Phosphatase and actin regulator like
XLOC_019235	PON83129.1hypothetical protein TorRG33x02_211030
XLOC_019236	ARQ80480.1germin-like protein
XLOC_019393	ABC59068.2alpha tubulin 1
XLOC_019399	PSS04005.1Protein REVEILLE like
XLOC_019490	PSS28845.1Kinesin-like protein
XLOC_019814	XP_027178632.1beta-galactosidase 3
XLOC_019874	XP_002308708.1early nodulin-like protein 1
XLOC_019904	PSS19130.1Annexin-like protein
XLOC_020195	PSR86649.1Kinesin-like protein
XLOC_020275	PSR87901.1Transcription factor like
XLOC_020483	PSR98214.1E3 ubiquitin-protein ligase SGR9
XLOC_020494	XP_027175992.1 laccase-4-like
XLOC_020496	PSR98292.1Laccase-17 like
XLOC_020526	XP_020214557.1auxin transporter-like protein 5
XLOC_020531	PSS25992.1Thaumatin-like protein
XLOC_020544	XP_002264435.1 peptidyl-prolyl cis-trans isomerase FKBP16-4, chloroplastic isoform X3
XLOC_020659	XP_022775630.1mitotic spindle checkpoint protein MAD2
XLOC_020726	PSS07801.1Aldehyde dehydrogenase family 2 member like
XLOC_020798	XP_009611099.1 E3 ubiquitin protein ligase RIE1-like
XLOC_020848	XP_006441717.1endoglucanase 3
XLOC_020940	XP_002308708.1early nodulin-like protein 1
XLOC_020954	PSR93156.1Tripartite terminase
XLOC_021156	PSS33879.1Protein FANTASTIC FOUR like
XLOC_021263	XP_021662511.1myb-like protein U
XLOC_021383	PSS29327.1PI-PLC X domain-containing protein
XLOC_021477	XP_022843505.1uncharacterized protein LOC111367048
XLOC_021533	PSS13958.1Cellulose synthase A catalytic subunit 7 [UDP-forming] like
XLOC_021647	PSS04551.1Syntaxin-22 like
XLOC_021655	PSR99567.1GDSL esterase/lipase
XLOC_021707	XP_021666180.1protein YLS3-like
XLOC_021768	RVX17385.1Beta-amyrin 28-oxidase
XLOC_021844	PSS05731.1Expansin-B16 like
XLOC_021912	XP_010250092.1 beta-glucuronosyltransferase GlcAT14B-like
XLOC_022227	RVW13004.1putative xyloglucan endotransglucosylase/hydrolase protein 32
XLOC_022310	PSR95124.1CLE46p like
XLOC_022319	PSS24670.1Protein STRUBBELIG-RECEPTOR FAMILY 3 like
XLOC_022341	PSS17943.1Aquaporin TIP2-1 like
XLOC_022567	PSR99920.1Peptidyl-prolyl cis-trans isomerase
XLOC_022663	PSR90967.1Leucine-rich repeat receptor-like protein kinase
XLOC_022824	PSR96827.1Lamin-like protein
XLOC_022871	XP_017217605.1 GDSL esterase/lipase At2g23540
XLOC_023029	PSR84638.1TRNA wybutosine-synthesizing protein like
XLOC_023305	PSS07764.1ATP-dependent RNA helicase
XLOC_023461	PSS00126.11-aminocyclopropane-1-carboxylate oxidase
XLOC_023783	AYW01687.1ZIP1 protein
XLOC_023897	PSS09523.1Laccase-3 like
XLOC_023930	PSS01861.1Protein of unknown function DUF538 protein
XLOC_023984	PSS21828.1Expansin-A16 like
XLOC_024166	PSR99565.1GDSL esterase/lipase
XLOC_024317	---NA---
XLOC_024346	XP_027086388.1beta-amyrin 28-monooxygenase-like
XLOC_024406	PSS26782.1GDSL esterase/lipase
XLOC_024440	PSS11619.1Aluminum-activated malate transporter like
XLOC_024591	PSS07877.1(-)-isopiperitenol/(-)-carveol dehydrogenase
XLOC_024706	PSR86606.1Fasciclin-like arabinogalactan protein
XLOC_024792	XP_021667100.1beta-galactosidase 5-like isoform X1
XLOC_025163	XP_011078389.1receptor-like serine/threonine-protein kinase At3g01300
XLOC_025257	XP_012842538.1 endoglucanase 8-like
XLOC_025545	PSS34301.1Protein NYNRIN like
XLOC_025546	PSS30509.1Ubiquitin-conjugating enzyme E2 like
XLOC_025548	XP_007050098.2 ribokinase isoform X1
XLOC_025556	XP_027336573.1novel plant SNARE 11
XLOC_025558	XP_021830230.1protein E6-like
XLOC_025559	XP_021830230.1protein E6-like
XLOC_025765	---NA---
XLOC_025918	XP_027069360.1WAT1-related protein At5g07050-like
XLOC_026012	PSS13958.1Cellulose synthase A catalytic subunit 7 [UDP-forming] like
XLOC_026084	PSR85234.1Beta-amyrin 28-oxidase
XLOC_026126	EOX96336.1Basic helix-loop-helix DNA-binding superfamily protein isoform 1
XLOC_026165	PSS07984.1Replication protein A DNA-binding subunit B like
XLOC_026178	XP_019167995.1 tubulin beta-2 chain
XLOC_026263	XP_027073216.1transcription factor MYB92-like
XLOC_026354	PSS00462.1Protein POLLENLESS 3-LIKE like
XLOC_026688	PSR86158.1Cytochrome P450 86A1 like
XLOC_026809	XP_012078100.1protein MARD1
XLOC_026825	PSS03936.1Aspartyl protease family protein
XLOC_027021	XP_019154572.1 gibberellin-regulated protein 4-like
XLOC_027226	PSS26100.1B3 domain-containing protein
XLOC_027319	PSS10154.1Transcription factor bHLH94 like
XLOC_027410	PSS29005.1DNA replication licensing factor MCM3 2 like
XLOC_027519	XP_027070029.1probable beta-1,4-xylosyltransferase IRX9
XLOC_027785	PSS06465.1Eukaryotic translation initiation factor 3 subunit C like
XLOC_027817	EOY02554.1Esterase, putative isoform 2
XLOC_027866	XP_019177958.1 cellulose synthase A catalytic subunit 7 [UDP-forming]-like
XLOC_027903	PSS33722.1Oligopeptide transport ATP-binding protein like
XLOC_027954	XP_018856577.1 polygalacturonase QRT2-like
XLOC_027977	PSS18970.1Flap endonuclease
XLOC_028167	PSS05691.1Reticulon-like protein
XLOC_028265	GAV63572.1Myb_DNA-binding domain-containing protein
XLOC_028477	---NA---
XLOC_028533	PSS24603.1GDSL esterase/lipase
XLOC_028561	XP_022871214.1uncharacterized protein LOC111390412
XLOC_028760	PSS03913.1Histone-lysine N-methyltransferase
XLOC_028762	XP_021678879.1ras-related protein RABA3-like
XLOC_028832	XP_021656284.1(6-4)DNA photolyase
XLOC_028949	XP_007209279.1alpha-1,4-glucan-protein synthase [UDP-forming] 2
XLOC_029030	XP_027061129.1calcium-binding protein PBP1-like
XLOC_029062	PSS32768.1Inactive receptor kinase
XLOC_029384	PSS23901.1Kinesin-like protein
XLOC_029548	XP_018843107.1 probable cellulose synthase A catalytic subunit 5 [UDP-forming]
XLOC_029602	XP_024995400.1geraniol 8-hydroxylase-like
XLOC_029793	XP_002270426.2 fasciclin-like arabinogalactan protein 10
XLOC_029950	PSS19651.1Microtubule-binding protein like
XLOC_029991	PSS00277.1Glutamate decarboxylase
XLOC_029998	PSS14405.12-alkenal reductase
XLOC_030028	PSS13937.1Reticulon-like protein
XLOC_030066	XP_002273521.1 cellulose synthase A catalytic subunit 4 [UDP-forming]
XLOC_030073	PSR85012.1GMP synthase
XLOC_030145	KGN55148.1 Fiber protein Fb34
XLOC_030232	PSS00292.1Developmental and secondary metabolism regulator veA like
XLOC_030268	PSS26675.1Seventh of septin like
XLOC_030304	PSS21081.1Afadin- and alpha-actinin-binding protein
XLOC_030435	XP_017633952.1 3-ketoacyl-CoA synthase 6-like
XLOC_030441	EOY03772.1COBRA-like extracellular glycosyl-phosphatidyl inositol-anchored protein family
XLOC_030603	XP_021623656.1GDP-mannose 3,5-epimerase 2
XLOC_030743	PSR91223.1DNL-type zinc finger protein
XLOC_030770	PSS02023.1Protein doublesex like
XLOC_030774	PSS07876.1LRR receptor-like serine/threonine-protein kinase FEI
XLOC_030818	XP_011091390.2probable pectate lyase 8
XLOC_031019	XP_027072861.1receptor protein kinase-like protein ZAR1
XLOC_031033	XP_023879110.1endoglucanase 9-like
XLOC_031176	XP_002266019.2 protein ODORANT1
XLOC_031340	PSR86510.1Stress-response A/B barrel domain-containing protein
XLOC_031360	XP_016727822.1PREDICTED: uncharacterized protein LOC107939041
XLOC_031365	XP_015074289.1PLAT domain-containing protein 3-like
XLOC_031366	PSR88090.1PLAT domain-containing protein
XLOC_031400	PSR91565.1Monocopper oxidase-like protein
XLOC_031547	PSS29244.1Replication factor C subunit
XLOC_031750	PSR86039.1BTB/POZ domain-containing protein
XLOC_031853	PSS14619.1Centrosomal protein
XLOC_032025	PSS00064.1WAT1-related protein
XLOC_032027	PSS30038.1Rhamnogalacturonate lyase
XLOC_032093	XP_023759542.1fasciclin-like arabinogalactan protein 17
XLOC_032207	PSS35219.1Protein KINESIN LIGHT CHAIN-RELATED like
XLOC_032271	XP_002285320.1 cyclin-D3-3
XLOC_032464	PSR98281.1Kinesin-like protein
XLOC_032494	PSS06415.1Non-specific lipid-transfer protein-like protein
XLOC_032497	PSS06415.1Non-specific lipid-transfer protein-like protein
XLOC_032664	PSS08352.1Cellulose synthase A catalytic subunit 7 [UDP-forming] like
XLOC_032733	PSS29112.1RNA-directed RNA polymerase
XLOC_033067	AZL56933.1cyclin-dependent kinase B2-2
XLOC_033196	XP_023882188.1vacuolar cation/proton exchanger 3-like isoform X1
XLOC_033303	XP_012072274.1endoglucanase 8
XLOC_033321	EOY23173.1Myb domain protein 18, putative
XLOC_033380	XP_022881117.1protein ODORANT1-like
XLOC_033429	XP_021686607.1non-specific lipid-transfer protein 8-like
XLOC_033519	XP_002267209.1 cytosolic sulfotransferase 12
XLOC_033584	XP_010067725.1 aspartyl protease AED3
XLOC_033647	XP_018848375.1 ribulose bisphosphate carboxylase small chain, chloroplastic-like
XLOC_034076	PON55231.1Bifunctional inhibitor/plant lipid transfer protein/seed storage helical domain containing protein
XLOC_034082	PSS06415.1Non-specific lipid-transfer protein-like protein
XLOC_034141	PSS24423.1Dirigent protein
XLOC_034378	XP_002281618.1 lysosomal Pro-X carboxypeptidase
XLOC_034407	PSS29262.1Nucleobase-ascorbate transporter like
XLOC_034528	RVW65908.1hypothetical protein CK203_007364
XLOC_034545	PSS33903.1Adenylate isopentenyltransferase
XLOC_034565	PSR98518.1Rho GTPase-activating protein
XLOC_034725	EOY11855.1 RNA polymerase II elongation factor ELL3 isoform 1
XLOC_034851	XP_017982568.1 beta-amyrin 28-oxidase
XLOC_034852	---NA---
XLOC_034888	XP_002518649.1uncharacterized protein LOC8280982 isoform X2
XLOC_034889	XP_022896144.1upstream activation factor subunit spp27-like isoform X1
XLOC_034918	XP_026463176.1 actin-3-like
XLOC_034925	XP_021289758.1caffeic acid 3-O-methyltransferase
XLOC_035055	PSS06415.1Non-specific lipid-transfer protein-like protein
XLOC_035178	PSR89984.1Auxin response factor like
XLOC_035532	PQQ17273.1gibberellin 20 oxidase 1-like
XLOC_035534	XP_021825441.1gibberellin 20 oxidase 1-like
XLOC_035601	PSS19580.1Clathrin assembly protein
XLOC_035658	PSS14296.1Kinesin-like protein
XLOC_036222	PSR96982.1GDP-fucose protein O-fucosyltransferase protein
XLOC_036276	PSS35047.1Glucomannan 4-beta-mannosyltransferase
XLOC_036515	PSS26994.1Somatic embryogenesis receptor kinase
XLOC_036649	PSS21514.1Protein UPSTREAM OF FLC like
XLOC_036830	PSR92849.1Fasciclin-like arabinogalactan protein
XLOC_036835	PSR92849.1Fasciclin-like arabinogalactan protein
XLOC_036836	PSR92849.1Fasciclin-like arabinogalactan protein
XLOC_036837	XP_010253626.1 fasciclin-like arabinogalactan protein 11
XLOC_036910	PSS00275.1UTP--glucose-1-phosphate uridylyltransferase like
XLOC_037006	XP_027124480.1putative Peroxidase 48
XLOC_037071	---NA---
XLOC_037079	PSS26792.1Kinesin-like protein
XLOC_037214	PSR84786.13-oxoacyl-[acyl-carrier-protein] reductase
XLOC_037254	PSS07946.1Serine/threonine-protein kinase
XLOC_037357	AIY62809.1carotenoid cleavage dioxygenase 4
XLOC_037409	ASL69231.1photosystem I subunit G
XLOC_037416	PSS29230.1Protein DMR6-LIKE OXYGENASE 1 like
XLOC_037445	PSR92464.1Wall-associated receptor kinase
XLOC_037573	XP_021665067.1protein NEGATIVE REGULATOR OF RESISTANCE-like
XLOC_037583	XP_010661679.1 scarecrow-like protein 27
XLOC_037594	XP_011101640.1cytochrome P450 77A2-like
XLOC_037735	PSR86362.1BTB/POZ domain-containing protein
XLOC_037741	PSR92525.1Glutamate synthase 1 [NADH] like
XLOC_037767	XP_010664880.1 auxin efflux carrier component 6
XLOC_037777	XP_003632328.1 serine/threonine-protein kinase Nek2
XLOC_037876	XP_010658502.1 rop guanine nucleotide exchange factor 5
XLOC_037877	XP_009351247.1 non-specific lipid-transfer protein 1-like
XLOC_038065	XP_023904167.122.7 kDa class IV heat shock protein-like
XLOC_038090	XP_009353647.1 expansin-A6-like
XLOC_038126	KZV38083.1transmembrane protein 45A-like
XLOC_038456	XP_002278788.1 rac-like GTP-binding protein RAC2
XLOC_038504	RVX18585.1Polygalacturonase 1 beta-like protein 3
XLOC_038565	PSS30211.1Germin-like protein subfamily 1 member 13
XLOC_038581	---NA---
XLOC_038585	---NA---
XLOC_038606	XP_002276880.1 scarecrow-like protein 28 isoform X1
XLOC_038621	PSS30174.1Protein WVD2-like
XLOC_038642	PSR99515.1Cyclin-B2-4 like
XLOC_038747	PSS14526.1FT-interacting protein
XLOC_038780	BAA86930.1lupeol synthase
XLOC_038909	PSS31421.1UDP-glucuronate:xylan alpha-glucuronosyltransferase
XLOC_038942	XP_023742800.1ankyrin repeat-containing protein At5g02620-like
XLOC_038999	PSS26788.1Shikimate O-hydroxycinnamoyltransferase
XLOC_039004	PSS30275.1Ribonucleoside-diphosphate reductase large subunit like
XLOC_039064	PSS24466.1Dual specificity protein kinase
XLOC_039310	PSR85967.1Cellulose synthase-like protein
XLOC_039312	PSR89533.1Kinesin-like protein
XLOC_039324	PSS33262.1WEB family protein
XLOC_039476	XP_022894886.1aspartic proteinase nepenthesin-1
XLOC_039499	PSS19559.1DNA oxidative demethylase
XLOC_039536	PSS31470.1Tyrosinase-like protein
XLOC_039564	XP_024159062.1protein trichome birefringence-like 41
XLOC_039632	XP_007052515.1 cytokinin riboside 5'-monophosphate phosphoribohydrolase LOG1 isoform X1
XLOC_039725	PSS11404.1Mitoferrin like
XLOC_039822	PSS04143.1Scopoletin glucosyltransferase
XLOC_039826	PSS04143.1Scopoletin glucosyltransferase
XLOC_039827	PSS11430.1Scopoletin glucosyltransferase
XLOC_039894	XP_022879839.13-ketoacyl-CoA synthase 6
XLOC_039928	XP_021670078.1protein ESKIMO 1-like isoform X5
XLOC_039973	PSS21650.1Germin-like protein
XLOC_040063	PSS04400.1WRKY transcription factor
XLOC_040227	PSS05737.1ELMO domain-containing protein
XLOC_040295	PSS32562.17-deoxyloganetic acid glucosyltransferase
XLOC_040301	PSS24603.1GDSL esterase/lipase
XLOC_040417	XP_006431263.1lamin-like protein
XLOC_040605	PSS21316.1Fatty acid amide hydrolase
XLOC_040774	PSS28654.1Cyclin-D1-1 like
XLOC_040778	KVH97781.1Cyclin-like protein
XLOC_040786	PSS34679.1Vacuolar cation/proton exchanger like
XLOC_041030	PSS36494.1Mannan endo-1,4-beta-mannosidase
XLOC_041145	XP_027159176.1NAD(P)H-quinone oxidoreductase subunit N, chloroplastic
XLOC_041268	PSR92725.1Random slug protein
XLOC_041416	PSS05838.1Anthocyanidin 3-O-glucoside 2'''-O-xylosyltransferase
XLOC_041456	PSS08004.1COBRA-like protein
XLOC_041743	PSS33143.1Molybdenum cofactor sulfurase
XLOC_041893	PSR86165.1Vacuolar cation/proton exchanger like
XLOC_041996	PSR93417.1Sucrose-phosphate synthase
XLOC_042080	PSS04931.1LRR receptor-like serine/threonine-protein kinase
XLOC_042104	AAN05009.1ribosome-inactivating protein
XLOC_042133	PSS14731.1Mediator of RNA polymerase II transcription subunit like
XLOC_042201	---NA---
XLOC_042269	PSS13922.1DNA replication licensing factor like
XLOC_042420	XP_010242789.1 esterase-like isoform X1
XLOC_042513	PSR95994.1Tubby-like protein
XLOC_042580	PSR95031.1Laccase-3 like
XLOC_042655	---NA---
XLOC_042717	PSS01641.1Protein WVD2-like
XLOC_042815	NP_001235445.1protein kinase
XLOC_042850	PSS34301.1Protein NYNRIN like
XLOC_043054	PSS24634.1Transcription factor bHLH36 like
XLOC_043097	PSS30460.1Mini zinc finger protein
XLOC_043108	PSS08081.1Inactive receptor kinase
XLOC_043129	XP_002270934.1 beta-amyrin synthase
XLOC_043251	AJF46887.1Myb-like transcription factor family protein
XLOC_043306	---NA---
XLOC_043344	XP_021608188.1probable galacturonosyltransferase 12
XLOC_043377	PSS04894.1Cytochrome b561 domain-containing protein
XLOC_043521	XP_017192897.1 transcription factor bHLH18-like isoform X1
XLOC_043604	PSS26017.1Kinesin-like protein
XLOC_043625	PSS03947.1Long chain acyl-CoA synthetase
XLOC_043628	PSS26281.1Cytochrome b561 and DOMON domain-containing protein
XLOC_043631	---NA---
XLOC_043809	PSS01619.1Receptor-like kinase
XLOC_043953	PSS31338.13-ketoacyl-CoA synthase
XLOC_044417	PSS13496.1Cytochrome P450 CYP749A22 like
XLOC_044424	XP_011083362.2galactan beta-1,4-galactosyltransferase GALS1
XLOC_044438	PSS02704.1PI-PLC X domain-containing protein
XLOC_044588	PSS02009.1Protein BIG GRAIN 1-like
XLOC_044822	PSS34905.1Glucomannan 4-beta-mannosyltransferase
XLOC_044944	PSS23751.1SH3 domain-containing protein
XLOC_045125	PSS02821.1Non-specific lipid-transfer protein-like protein
XLOC_045220	PIN08051.1Pleiotropic drug resistance proteins (PDR1-15), ABC superfamily
XLOC_045270	PSR96049.1Myosin-10 like
XLOC_045280	XP_027171253.1protein TPX2
XLOC_045303	XP_023920844.1endoglucanase 11
XLOC_045756	PSS30211.1Germin-like protein subfamily 1 member 13
XLOC_045764	PSS36494.1Mannan endo-1,4-beta-mannosidase
XLOC_045783	PSS00498.1Metallothiol transferase
XLOC_046024	PSR98468.1Ras-related protein like
XLOC_046057	PSR93580.1Beta-amyrin 28-oxidase
XLOC_046161	PSS32255.1Transcription factor like
XLOC_046208	PSS34908.1Cytochrome P450 76A2 like
XLOC_046285	PSR89967.1Classical arabinogalactan protein
XLOC_046315	XP_018818249.1 cytochrome P450 714C2-like
XLOC_046384	PSS10228.1Non-classical arabinogalactan protein
XLOC_046419	PSR88303.1Non-specific lipid-transfer protein like
XLOC_046521	PSS15798.1Cation/calcium exchanger like
XLOC_046604	XP_009785480.1 protein YLS9
XLOC_046623	XP_002282027.2 interactor of constitutive active ROPs 3 isoform X3
XLOC_046713	PSS13404.1Phosphate transporter like
XLOC_046755	XP_002268764.1 patellin-4
XLOC_046803	XP_009802493.1 beta-xylosidase/alpha-L-arabinofuranosidase 1-like isoform X1
XLOC_046863	PSS30209.1Germin-like protein subfamily 1 member 13
XLOC_047091	PSS11949.1DNA replication ATP-dependent helicase
XLOC_047110	PSR93204.1Serine/threonine-protein kinase dyrk2
XLOC_047215	XP_002323456.1probable beta-1,4-xylosyltransferase IRX9 isoform X2
XLOC_047221	PSS00479.1Portal protein
XLOC_047222	XP_012436804.1 gibberellin-regulated protein 1-like isoform X1
XLOC_047295	GAV70878.1Glyco_hydro_19 domain-containing protein
XLOC_047355	XP_010259341.1 protein TPX2
XLOC_047428	PIN19599.1Triacylglycerol lipase
XLOC_047500	PSS10102.1Rac-like GTP-binding protein
XLOC_047595	PSS07876.1LRR receptor-like serine/threonine-protein kinase FEI
XLOC_047601	PSS33275.1Laccase-12 like
XLOC_047698	XP_012088748.1LRR receptor kinase BAK1
XLOC_047723	PSS07764.1ATP-dependent RNA helicase
XLOC_047747	PSS18033.1Inositol oxygenase
XLOC_047835	PSS36624.1Expansin-A13 like
XLOC_047920	PSS06378.1Inactive patatin-like protein
XLOC_048061	XP_017234202.1 CASP-like protein 1B1
XLOC_048153	XP_022013545.1transmembrane protein 97-like isoform X2
XLOC_048166	PSS01727.1Stomatal closure-related actin-binding protein
XLOC_048238	PSS24455.1DNA topoisomerase
XLOC_048301	PSS26082.1Kinesin-like protein

## Sheet: D
378 common elements in "ARS7 G4", "ARS7 R5", "ARS1 G2" and "ARS1 R2":
XLOC_001051	PSS02771.1Nitronate monooxygenase
XLOC_004098	PSS30522.1Receptor-like protein kinase
XLOC_005429	PSS24438.1UPF0496 protein
XLOC_005584	PSS16197.1CBS domain-containing protein
XLOC_006141	AUM57505.1anthocyanidin 3-O-glucosyltransferase
XLOC_006181	PSS23868.1Cationic peroxidase
XLOC_006951	---NA---
XLOC_006977	---NA---
XLOC_008717	XP_019054622.1 endochitinase EP3-like
XLOC_009055	XP_002280532.1 probable glutathione S-transferase
XLOC_009534	XP_002266027.2 probable aldo-keto reductase 4
XLOC_011721	PSS29361.1Hormone receptor 4 like
XLOC_011995	PSS36137.1Cathepsin L-like
XLOC_015107	AUM57505.1anthocyanidin 3-O-glucosyltransferase
XLOC_015719	PSR93228.1Abscisic acid receptor like
XLOC_016011	PSS20926.1EIN3-binding F-box protein
XLOC_016071	PSS35162.1Plant cysteine oxidase
XLOC_016097	AUM57505.1anthocyanidin 3-O-glucosyltransferase
XLOC_018142	PSR93580.1Beta-amyrin 28-oxidase
XLOC_018365	PSS35017.1Zeatin O-glucosyltransferase
XLOC_019058	XP_024193669.1plant intracellular Ras-group-related LRR protein 6-like
XLOC_019100	RWR96804.1endochitinase EP3-like protein
XLOC_019247	XP_006483763.1non-functional NADPH-dependent codeinone reductase 2
XLOC_020639	PSR98696.1Dammarenediol II synthase
XLOC_021035	XP_010663618.1 LEAF RUST 10 DISEASE-RESISTANCE LOCUS RECEPTOR-LIKE PROTEIN KINASE-like 2.7
XLOC_022715	XP_016705834.1 expansin-A15
XLOC_022957	PSS09494.1Zinc finger CCCH domain-containing protein
XLOC_023880	XP_011465185.1 expansin-like B1
XLOC_024850	PSS11246.1Methionine gamma-lyase
XLOC_025807	PSR93298.1Ethylene-responsive transcription factor 5 like
XLOC_026203	PSR87631.1Phloem protein 2-like protein
XLOC_026905	XP_002280532.1 probable glutathione S-transferase
XLOC_028253	XP_019234790.1 AAA-ATPase At2g46620-like
XLOC_029120	PSS16048.1Glutathione S-transferase
XLOC_029167	---NA---
XLOC_029273	---NA---
XLOC_029340	XP_002533339.1ARGOS-like protein
XLOC_030695	PSR96695.1Inactive poly [ADP-ribose] polymerase SRO2
XLOC_031391	PSR98772.1Beta-D-glucosyl crocetin beta-1,6-glucosyltransferase
XLOC_031629	---NA---
XLOC_033415	---NA---
XLOC_034781	PSS09421.1Scarecrow-like protein
XLOC_034782	PSS09420.1Scarecrow-like protein
XLOC_035550	PSR87684.1Calcium-binding protein CML45
XLOC_039551	GAV65023.1Lipase_3 domain-containing protein
XLOC_039563	PSS05934.1LRR receptor-like serine/threonine-protein kinase
XLOC_039660	PSS31617.1Protein ovarian tumor locus like
XLOC_039748	---NA---
XLOC_041956	ANY57270.1auxin transport carrier
XLOC_043477	AUM57504.1anthocyanidin 3-O-glucosyltransferase
XLOC_044308	PSS14343.1Diacylglycerol kinase
XLOC_044341	PSS21690.1B-box zinc finger protein
XLOC_045327	RVW43386.1Protein-tyrosine-phosphatase MKP1
XLOC_045997	PSR96111.1Coatomer subunit beta
XLOC_047547	PSR93580.1Beta-amyrin 28-oxidase
XLOC_000240	XP_023902084.1heat stress transcription factor B-3-like isoform X1
XLOC_000293	PSR93093.1Protein unc-13 4B like
XLOC_000296	PSS01811.1Guanylate kinase
XLOC_000536	XP_010649582.1 methylecgonone reductase
XLOC_000537	RVW99169.1Methylecgonone reductase
XLOC_001059	RXH71687.1hypothetical protein DVH24_025188
XLOC_001317	PSS19859.1Thaumatin-like protein
XLOC_001394	XP_023872335.1UDP-glycosyltransferase 73C6-like
XLOC_001396	GAV58921.1UDPGT domain-containing protein
XLOC_001669	XP_011001918.1 probable WRKY transcription factor 30
XLOC_001898	PSS33779.1Ethylene receptor like
XLOC_002190	XP_012093036.1LEAF RUST 10 DISEASE-RESISTANCE LOCUS RECEPTOR-LIKE PROTEIN KINASE-like 1.2
XLOC_002282	XP_016720060.1 peroxidase 73-like
XLOC_002384	PSS26522.1Glutathione S-transferase
XLOC_002469	PSS11320.1Myb-related protein like
XLOC_002768	XP_022736609.1expansin-like B1 isoform X1
XLOC_002915	XP_022855378.1MACPF domain-containing protein At1g14780-like isoform X2
XLOC_002916	PSS13374.1S-adenosylmethionine-dependent methyltransferase
XLOC_003231	PSS34637.1BAHD acyltransferase
XLOC_003320	PSR95971.1Mitochondrial phosphate carrier protein like
XLOC_003660	PSR86162.1Receptor-like protein kinase
XLOC_004109	XP_010249458.1 ethylene-responsive transcription factor ERF113
XLOC_004124	XP_002276804.1 UDP-glycosyltransferase 83A1
XLOC_004562	CAA88846.1polygalacturonase inhibitor
XLOC_004570	PON47600.1CDP-diacylglycerol-glycerol-3-phosphate 3-phosphatidyltransferase
XLOC_004767	PSS04002.11-aminocyclopropane-1-carboxylate synthase
XLOC_004871	XP_006349827.1 major allergen Pru ar 1-like
XLOC_005128	XP_017254995.1 protein NRT1/ PTR FAMILY 2.11
XLOC_005593	ASJ80919.1abscisic acid 8'-hydroxylase 1
XLOC_005709	XP_006471269.1protein ZINC INDUCED FACILITATOR-LIKE 1 isoform X1
XLOC_005818	CAA88846.1polygalacturonase inhibitor
XLOC_005825	EOX97418.1Nodulin MtN21 /EamA-like transporter family protein, putative isoform 1
XLOC_005862	PSR86441.1E3 ubiquitin-protein like
XLOC_005975	AWH66263.1phosphate transporter protein 1
XLOC_006211	EOX98401.1Auxin-responsive GH3 family protein
XLOC_006232	GAV79710.12OG-FeII_Oxy domain-containing protein/DIOX_N domain-containing protein
XLOC_006320	PSS03032.1TRNA (guanine-N(7)-)-methyltransferase non-catalytic subunit like
XLOC_006550	XP_007044496.1 zinc finger protein 5
XLOC_006710	PSS34611.1Zinc finger protein
XLOC_007025	PSS10173.1Shikimate dehydrogenase
XLOC_007241	XP_009617302.1 endochitinase A
XLOC_007275	PSS04702.1Rhodanese-like domain-containing protein
XLOC_007285	OMP00753.1Plastocyanin-like protein
XLOC_007601	KYP55377.1 Rhizopine catabolism protein mocA
XLOC_007697	XP_009804280.1 heat stress transcription factor B-2a-like
XLOC_007876	XP_018840394.1 epidermis-specific secreted glycoprotein EP1-like
XLOC_008097	GAV82596.1DUF4228 domain-containing protein
XLOC_008425	PSS17241.1Patatin-like protein
XLOC_008504	PSS02545.1Beta-amyrin 28-oxidase
XLOC_008556	PSS17965.1Thaumatin-like protein
XLOC_008632	XP_012479216.1 glyceraldehyde-3-phosphate dehydrogenase, cytosolic
XLOC_008682	XP_024466834.1epidermis-specific secreted glycoprotein EP1
XLOC_008715	AET25429.1class IV chitinase
XLOC_008768	PSR86437.1Berberine bridge enzyme-like
XLOC_008792	XP_024930944.1thaumatin-like protein 1b
XLOC_008810	EOY13942.1Cytochrome P450 71D10, putative
XLOC_009133	PSR91508.1Osmotin-like protein
XLOC_009134	PSR91508.1Osmotin-like protein
XLOC_009179	PSS33400.1Acetyltransferase NATA1-like
XLOC_009299	PSS05790.1G-type lectin S-receptor-like serine/threonine-protein kinase
XLOC_009696	XP_004299508.1 mitogen-activated protein kinase kinase 9-like
XLOC_009705	PON79328.1AT-hook motif nuclear-localised protein
XLOC_009706	PON79328.1AT-hook motif nuclear-localised protein
XLOC_009707	EOY07455.1Receptor lectin kinase
XLOC_009762	PSS31458.1Isoaspartyl peptidase/L-asparaginase 2 subunit beta like
XLOC_009832	XP_006492616.1bifunctional riboflavin biosynthesis protein RIBA 1, chloroplastic-like
XLOC_009907	XP_004235822.1calcium-binding allergen Ole e 8
XLOC_009924	XP_022744814.1E3 ubiquitin-protein ligase PUB23-like
XLOC_009925	PSS15861.1E3 ubiquitin-protein like
XLOC_010169	XP_027091448.1uncharacterized oxidoreductase At4g09670-like
XLOC_010170	XP_027091448.1uncharacterized oxidoreductase At4g09670-like
XLOC_010480	XP_007027990.1 E3 ubiquitin-protein ligase PUB23
XLOC_010512	PSR99923.13-isopropylmalate dehydratase large subunit like
XLOC_010618	PSS34282.1Late embryogenesis abundant protein
XLOC_010629	AFH56411.1ethylene response factor 4
XLOC_010713	ADB85571.1D-galacturonic acid reductase 1
XLOC_010744	PSR99989.1Trehalose-phosphate phosphatase
XLOC_010981	KVH93911.1Arabinogalactan peptide, AGP
XLOC_011405	PSS34525.1LOB domain-containing protein
XLOC_011548	PSS32740.1U-box domain-containing protein
XLOC_012466	XP_006492999.1putative methyltransferase DDB_G0268948 isoform X1
XLOC_012586	---NA---
XLOC_012667	---NA---
XLOC_012697	PSS01869.15-methyltetrahydropteroyltriglutamate--homocysteine methyltransferase
XLOC_012920	PSR92700.1Sugar transport protein
XLOC_013211	PSR92881.1Ethylene-responsive transcription factor 1B like
XLOC_013386	PSS02800.1Protein DMR6-LIKE OXYGENASE 2 like
XLOC_013413	PSS11086.1VQ motif-containing protein
XLOC_013458	---NA---
XLOC_013617	PSS20885.1Lipoyl synthase
XLOC_013692	---NA---
XLOC_013925	PSS30304.1GEM-like protein
XLOC_013965	---NA---
XLOC_014000	PSR96247.1Cytochrome P450 71D10 like
XLOC_014060	XP_002285728.2 protein DETOXIFICATION 27
XLOC_014132	PSS35017.1Zeatin O-glucosyltransferase
XLOC_014138	---NA---
XLOC_014490	ACH87170.1nam-like protein
XLOC_015088	PSS34909.1Cytochrome P450 76A2 like
XLOC_015154	PSS07350.1Protein ROOT HAIR DEFECTIVE like
XLOC_015176	PSR84834.1ATP-citrate synthase alpha chain protein
XLOC_015212	RVW65355.1putative glucan 1,3-beta-glucosidase A
XLOC_015305	RVW24579.11-aminocyclopropane-1-carboxylate oxidase-like 1
XLOC_015306	PSS09439.11-aminocyclopropane-1-carboxylate oxidase
XLOC_015436	AEM62884.1ACC oxidase 5
XLOC_015643	AEW24432.1late embryogenesis abundant protein 3L-1
XLOC_015986	PSS04186.1BTB/POZ domain-containing protein
XLOC_016135	PSS20926.1EIN3-binding F-box protein
XLOC_016305	PSS26978.1WRKY transcription factor
XLOC_016440	XP_015871146.1protein ROOT HAIR DEFECTIVE 3-like
XLOC_016463	PSR91024.1G-type lectin S-receptor-like serine/threonine-protein kinase
XLOC_016464	PSR84521.1Blue copper protein
XLOC_016589	XP_023917021.1peroxidase P7-like
XLOC_017108	PSR93233.1Acetyl-coenzyme A synthetase
XLOC_017527	RVX10738.1Retrovirus-related Pol polyprotein from transposon RE2
XLOC_017665	ACH87170.1nam-like protein
XLOC_017742	PSR99829.1Mitochondrial uncoupling protein
XLOC_017744	PSR99829.1Mitochondrial uncoupling protein
XLOC_017773	XP_027089132.1phospholipase A1-Igamma1, chloroplastic-like
XLOC_017827	PSS04759.1Actin cytoskeleton-regulatory complex protein
XLOC_018483	---NA---
XLOC_018519	XP_002516533.1receptor-like protein kinase HSL1
XLOC_018559	XP_012070613.1uncharacterized protein LOC105632779
XLOC_018777	XP_002278996.1 peroxidase 4-like
XLOC_018923	AYQ58345.13-hydroxy-3-methylglutaryl coenzyme A reductase1
XLOC_018973	RVW74695.1UDP-glycosyltransferase 74F2
XLOC_019077	XP_022876417.1peroxidase N1-like
XLOC_019079	PHT51504.1Peroxidase N1
XLOC_019134	PSS04905.1Dammarenediol II synthase
XLOC_019177	PSR92557.1Pathogenesis-related protein like
XLOC_019696	PSS32357.1Late embryogenesis abundant protein
XLOC_019757	PSS33686.1Calcium-binding protein CML45
XLOC_019903	XP_023928676.1UDP-glycosyltransferase 74F2-like
XLOC_019927	RWR81530.1transcription factor MYB14
XLOC_019950	PSS34282.1Late embryogenesis abundant protein
XLOC_019952	PSS34282.1Late embryogenesis abundant protein
XLOC_020220	---NA---
XLOC_020470	PSS35764.1RNA-binding protein
XLOC_020652	PSS26931.1ABC transporter C family member 3 like
XLOC_020786	PSS02991.1F-box protein
XLOC_020980	PSS34284.1Late embryogenesis abundant protein
XLOC_021161	PSR96006.1WRKY transcription factor
XLOC_021201	XP_021634673.1probable E3 ubiquitin-protein ligase HIP1
XLOC_021412	AOT86863.14-hydroxy-3-methylbut-2-enyl diphosphate reductase 2
XLOC_021446	PSR98043.1Beta-D-glucosyl crocetin beta-1,6-glucosyltransferase
XLOC_021605	PSS18154.1RING-H2 finger protein
XLOC_021606	PSS18155.1RING-H2 finger protein
XLOC_021792	PSR91773.1NADP-dependent malic enzyme like
XLOC_022409	PIN14781.13-hydroxy-3-methylglutaryl-CoA (HMG-CoA) reductase
XLOC_022410	P48021.1RecName: Full=3-hydroxy-3-methylglutaryl-coenzyme A reductase; Short=HMG-CoA reductase
XLOC_022494	PSS09468.1Protein NRT1/ PTR FAMILY 8.1 like
XLOC_022595	RDX64151.1Inorganic phosphate transporter 1-4
XLOC_022790	AYA60132.1GABA transporter 2
XLOC_022821	PSS33333.1Nematode resistance protein like
XLOC_022830	XP_027121557.1probable WRKY transcription factor 40
XLOC_022836	XP_027121557.1probable WRKY transcription factor 40
XLOC_022920	PQQ10563.1peroxidase 44
XLOC_023049	PSS17868.1Protein phosphatase Slingshot 1 like
XLOC_023088	XP_022873091.11-aminocyclopropane-1-carboxylate oxidase homolog 1-like
XLOC_023371	PSS04905.1Dammarenediol II synthase
XLOC_023437	PSR85051.1Protein DMR6-LIKE OXYGENASE 2 like
XLOC_023574	PSR92771.1Dammarenediol II synthase
XLOC_024015	XP_009617302.1 endochitinase A
XLOC_024065	PSS14537.1ADP,ATP carrier protein like
XLOC_024210	PSS02799.1Protein DMR6-LIKE OXYGENASE 2 like
XLOC_024374	XP_022847926.1putative methyltransferase DDB_G0268948
XLOC_024452	PSR98697.1Glucan endo-1,3-beta-glucosidase
XLOC_024740	PSS30625.1Protein C2-DOMAIN ABA-RELATED like
XLOC_024965	PSR91773.1NADP-dependent malic enzyme like
XLOC_025061	PSR86785.1E3 ubiquitin-protein like
XLOC_025157	PSR89857.1Glucan endo-1,3-beta-glucosidase
XLOC_025259	PSR96111.1Coatomer subunit beta
XLOC_025313	PSS29399.14-hydroxy-3-methylbut-2-enyl diphosphate reductase
XLOC_025333	PIN07923.1Ubiquinol oxidase
XLOC_025448	XP_002276013.1 bifunctional L-3-cyanoalanine synthase/cysteine synthase 1, mitochondrial isoform X2
XLOC_025473	PSS17965.1Thaumatin-like protein
XLOC_025608	PSS06324.1Stem-specific protein
XLOC_025913	ACV50436.1Avr9/Cf-9 rapidly elicited protein
XLOC_025977	XP_023924596.1cytochrome P450 CYP749A22-like
XLOC_026118	PSR95600.1Valine--tRNA ligase
XLOC_026122	PSR95600.1Valine--tRNA ligase
XLOC_026462	PSS04905.1Dammarenediol II synthase
XLOC_026667	XP_010257004.1 WRKY transcription factor WRKY24-like isoform X1
XLOC_026982	PSS31481.1Adenine phosphoribosyltransferase
XLOC_026998	PSR92868.1Glutathione S-transferase
XLOC_027070	XP_023891874.1transcription repressor MYB5-like
XLOC_027243	PSR98306.1Fructokinase-4 like
XLOC_027454	GAV90004.1ADH_zinc_N domain-containing protein/ADH_N domain-containing protein
XLOC_028171	XP_027127316.1ethylene-responsive transcription factor 4-like
XLOC_028428	XP_011077504.1 probable WRKY transcription factor 33
XLOC_028646	XP_027334749.1ethylene-responsive transcription factor 1A-like
XLOC_029410	XP_015886216.1putative 12-oxophytodienoate reductase 11
XLOC_029640	PSS28752.1NAC transcription factor
XLOC_030004	PSS05761.1GTPase-activating protein
XLOC_030236	PSS19027.1Flavin-dependent thymidylate synthase
XLOC_030241	XP_002264797.2 ethylene-responsive transcription factor ABR1
XLOC_030340	PSR99904.1Adenine phosphoribosyltransferase
XLOC_030341	PSS17298.1Zinc finger protein
XLOC_030345	PSS17298.1Zinc finger protein
XLOC_030390	XP_002274420.2 UDP-glycosyltransferase 87A1
XLOC_030489	XP_015897269.1ammonium transporter 2-like
XLOC_030736	EOY31841.1Plasma membrane ATPase 4 isoform 2
XLOC_030809	PSS35017.1Zeatin O-glucosyltransferase
XLOC_030810	PSS35017.1Zeatin O-glucosyltransferase
XLOC_030972	PSS09858.1Aldo-keto reductase family 4 member like
XLOC_030987	AID51426.1ethylene response factor 21
XLOC_031028	PSS31868.1DNA-damage-repair/toleration protein
XLOC_031116	XP_018857970.1 ankyrin repeat-containing protein At5g02620-like
XLOC_031122	XP_002533339.1ARGOS-like protein
XLOC_031457	XP_027117505.1ethylene-responsive transcription factor 1B
XLOC_031476	PSR89888.1GABA transporter like
XLOC_031551	---NA---
XLOC_031676	XP_002284777.1 stem-specific protein TSJT1
XLOC_031775	XP_002264797.2 ethylene-responsive transcription factor ABR1
XLOC_032311	XP_023916938.1protein NYNRIN-like
XLOC_032787	---NA---
XLOC_032825	PSS16046.1Glutathione S-transferase
XLOC_032862	AYW01721.1persimmon protein ERF25
XLOC_032916	XP_011083803.1transcription factor MYB44-like
XLOC_032956	PSR94859.1Protein DMR6-LIKE OXYGENASE 2 like
XLOC_032980	PSR89064.1Transcription factor like
XLOC_033131	PSR92870.1Myb-related protein like
XLOC_033225	PSS35043.1LOB domain-containing protein
XLOC_033297	PSS07888.1WRKY transcription factor 72
XLOC_033563	XP_012484787.1 protein TIFY 5A-like
XLOC_033850	PSS13895.1Arogenate dehydrogenase
XLOC_034305	PSS13924.1Acidic mammalian chitinase
XLOC_034323	PSS02800.1Protein DMR6-LIKE OXYGENASE 2 like
XLOC_034686	PSS19746.1Subtilisin-like protease
XLOC_034696	PSR97980.1Protein NRT1/ PTR FAMILY 5.2 like
XLOC_034940	PSS32357.1Late embryogenesis abundant protein
XLOC_034993	PSR88297.1Melanoma inhibitory activity protein
XLOC_035274	PSS21275.1Mitogen-activated protein kinase kinase
XLOC_035299	ADJ67439.1ethylene response factor 10
XLOC_035544	RVW47332.1Transcription factor bHLH167
XLOC_035597	PSR84521.1Blue copper protein
XLOC_035667	PSR92557.1Pathogenesis-related protein like
XLOC_035692	XP_027066351.1zeatin O-glucosyltransferase-like
XLOC_036145	PSS28744.1Extracellular ribonuclease
XLOC_036220	XP_027066052.1probable 2-oxoglutarate-dependent dioxygenase At3g111800
XLOC_036385	PSS24914.1E3 ubiquitin-protein like
XLOC_036620	PSR89837.1CCR4-associated factor 1 like
XLOC_036716	PSS15856.1Syntaxin-121 like
XLOC_036777	ACT33043.1RAV transcription factor
XLOC_036878	XP_002275843.2 allantoate deiminase
XLOC_036990	XP_027122942.1omega-hydroxypalmitate O-feruloyl transferase-like
XLOC_037163	PSR84721.1LOB domain-containing protein
XLOC_037165	PSR84721.1LOB domain-containing protein
XLOC_037276	RVX23135.1Protein detoxification 27
XLOC_037348	PSS20885.1Lipoyl synthase
XLOC_037414	PSS33599.1LOB domain-containing protein
XLOC_037415	PSS02799.1Protein DMR6-LIKE OXYGENASE 2 like
XLOC_037681	XP_015902832.1receptor-like protein kinase HSL1
XLOC_037890	XP_022771770.1probable WRKY transcription factor 31
XLOC_037917	---NA---
XLOC_037999	AFQ98369.1hydroxymethylbutenyl diphosphate reductase
XLOC_038085	RVW30126.1Scopoletin glucosyltransferase
XLOC_038341	PSR86464.1F-box protein
XLOC_038800	PSR93478.1Expansin-like like
XLOC_038956	PSS04905.1Dammarenediol II synthase
XLOC_038995	PSS30062.1U-box domain-containing protein
XLOC_039359	---NA---
XLOC_039404	PSS24267.12-oxoglutarate-dependent dioxygenase
XLOC_039441	XP_019080237.1 UDP-glycosyltransferase 90A1-like
XLOC_039753	XP_007050467.2 calcium-transporting ATPase 12, plasma membrane-type
XLOC_039824	XP_010275243.1 AT-hook motif nuclear-localized protein 23-like
XLOC_039857	PSS32634.1Receptor protein kinase
XLOC_040058	XP_009764700.1 protein NRT1/ PTR FAMILY 2.11-like
XLOC_040487	XP_021804676.1ethylene-responsive transcription factor ERF095-like
XLOC_040765	PSR88189.1Cytochrome P450 CYP749A22 like
XLOC_040772	XP_011097952.1probable NAD(P)H dehydrogenase (quinone) FQR1-like 1
XLOC_040773	XP_011097952.1probable NAD(P)H dehydrogenase (quinone) FQR1-like 1
XLOC_040808	PSS01221.1Protein REVERSION-TO-ETHYLENE like
XLOC_040993	PSS26823.1D-galacturonate reductase
XLOC_040994	ADB85571.1D-galacturonic acid reductase 1
XLOC_041333	XP_018858310.1 probable WRKY transcription factor 75
XLOC_041445	PSS29319.1Scopoletin glucosyltransferase
XLOC_041623	PSR86464.1F-box protein
XLOC_041662	XP_017218672.1 protein ROOT HAIR DEFECTIVE 3-like
XLOC_041818	---NA---
XLOC_042237	XP_027097574.1gibberellin receptor GID1B-like
XLOC_042362	AJF38901.1NAC transcription factor
XLOC_042551	PON41646.1Oxoglutarate/iron-dependent dioxygenase
XLOC_042839	PSS02799.1Protein DMR6-LIKE OXYGENASE 2 like
XLOC_042941	ASL69240.1ethylene response factor 26
XLOC_043034	XP_021833657.17-deoxyloganetin glucosyltransferase-like
XLOC_043308	PSS16037.1Gibberellin 2-beta-dioxygenase
XLOC_043468	PSS34611.1Zinc finger protein
XLOC_043479	AUM57505.1anthocyanidin 3-O-glucosyltransferase
XLOC_043513	XP_015060689.1ethylene-responsive transcription factor ERF114-like
XLOC_043514	RVW52662.1Ethylene-responsive transcription factor ERF114
XLOC_043879	PSR85104.1RING-H2 finger protein
XLOC_043918	XP_018828546.1 WRKY transcription factor WRKY24-like isoform X2
XLOC_044037	PSR99742.1Trafficking kinesin-binding protein like
XLOC_044123	ARJ54928.1calcium-dependent protein kinases 1
XLOC_044279	PSS11371.11-aminocyclopropane-1-carboxylate synthase
XLOC_044413	PSS05601.1Dynein light chain like
XLOC_044655	PSR86214.1WRKY transcription factor
XLOC_044890	PSS04918.1UDP-4-amino-4,6-dideoxy-N-acetyl-beta-L-altrosamine transaminase
XLOC_044981	XP_019072830.1 G-type lectin S-receptor-like serine/threonine-protein kinase At4g27290 isoform X1
XLOC_045103	RVX04199.1WRKY transcription factor 22
XLOC_045530	PSS36491.1Sodium/potassium-transporting ATPase subunit alpha-1 like
XLOC_045559	---NA---
XLOC_045808	PSS23777.1Tropinone reductase
XLOC_046008	PSR99528.14-coumarate--CoA ligase-like
XLOC_046106	RVW54839.1Basic 7S globulin
XLOC_046113	RVW54839.1Basic 7S globulin
XLOC_046352	PSS19046.1Receptor-like protein kinase
XLOC_046420	PSS05934.1LRR receptor-like serine/threonine-protein kinase
XLOC_046440	ANB66339.1jasmonate-zim-domain protein
XLOC_046507	PSR86314.1Cysteine-rich repeat secretory protein
XLOC_046510	PSR93027.1VPS10 2 like
XLOC_046522	XP_002268412.1 cationic peroxidase 1
XLOC_046527	XP_002268412.1 cationic peroxidase 1
XLOC_046795	PSR87945.1Xyloglucan galactosyltransferase
XLOC_046818	XP_021802641.1mitogen-activated protein kinase kinase 9-like
XLOC_046835	PSR85053.1F-box/kelch-repeat protein
XLOC_046845	XP_023910502.1G-type lectin S-receptor-like serine/threonine-protein kinase At1g11330
XLOC_047178	XP_027066568.1peroxidase 57-like
XLOC_047534	PSR95001.1Cytochrome P450 714C2 like
XLOC_047973	XP_022727255.1lysine histidine transporter-like 8
XLOC_047977	XP_027085945.1lysine histidine transporter-like 8
XLOC_047991	PSS05007.1Ethylene-responsive transcription factor 1B like

## Sheet: E
283 common elements in "ARS7 G5", "ARS7 R1", "ARS1 G5" and "ARS1 R5":
XLOC_000029	---NA---
XLOC_000143	AEL30371.1TIR-NBS-LRR type disease resistance protein
XLOC_000285	PSS14217.1Bifunctional lysine-specific demethylase and histidyl-hydroxylase
XLOC_000465	EOY32767.1Saccharopine dehydrogenase isoform 2
XLOC_000583	XP_018840766.1 CLIP-associated protein isoform X1
XLOC_000671	PSS11462.1Ubiquitin carboxyl-terminal hydrolase like isoform 2
XLOC_000819	---NA---
XLOC_000830	XP_002280159.1 probable receptor-like protein kinase At2g42960
XLOC_001103	XP_023891556.1pentatricopeptide repeat-containing protein MRL1, chloroplastic
XLOC_001710	PSS00139.1G-type lectin S-receptor-like serine/threonine-protein kinase
XLOC_001736	PSS29469.1Subtilisin-like protease
XLOC_002306	PSR93568.1Chaperone protein like
XLOC_002407	PRQ60730.1putative nucleotidyltransferase, Ribonuclease H
XLOC_002450	PSS17217.1Methyltransferase-like protein
XLOC_002767	PSR86127.1D-xylose-proton symporter-like
XLOC_002838	PSS21584.1RapA guanosine triphosphatase-activating protein
XLOC_002963	XP_019071829.1 receptor-like protein 12
XLOC_003169	AAG50698.1copia-type polyprotein, putative
XLOC_003452	---NA---
XLOC_003813	PSR89216.1Protein ASPARTIC PROTEASE IN GUARD CELL 1 like
XLOC_003892	PSS10139.1Protein LOW PSII ACCUMULATION 3 like
XLOC_003959	AKM12330.1flavonoid 3'-hydroxylase 3
XLOC_004024	PSR89085.1Alpha-1,6-mannosyltransferase MNN10
XLOC_004034	XP_027351309.1uncharacterized protein LOC113862421
XLOC_004077	XP_010271268.1 pectinesterase-like
XLOC_004085	PSR93137.1BTB/POZ and MATH domain-containing protein
XLOC_004644	PSS21530.1Somatic embryogenesis receptor kinase
XLOC_004666	PSR98508.1Cell division protein FtsZ 2-2 like
XLOC_005068	PSS02889.1Transcription factor like
XLOC_005078	PSS02875.1Inner centromere protein like
XLOC_005170	PIN24633.1hypothetical protein CDL12_02633
XLOC_005460	---NA---
XLOC_005526	---NA---
XLOC_006117	CBI17731.3unnamed protein product, partial
XLOC_006351	XP_009622504.1 photosystem I reaction center subunit IV B, chloroplastic
XLOC_007347	PSR86303.1Sodium/metabolite cotransporter like
XLOC_008054	PSS21702.1Zinc finger CCCH domain-containing protein
XLOC_008484	XP_010662444.1 CCR4-NOT transcription complex subunit 1 isoform X1
XLOC_008495	PSS33186.1Leucine-rich repeat receptor-like protein kinase
XLOC_008502	XP_023917945.1peroxisomal membrane protein 11-4
XLOC_008774	PSS09455.14-hydroxy-tetrahydrodipicolinate synthase
XLOC_008853	XP_016686119.1 isoamylase 1, chloroplastic-like
XLOC_008973	XP_018842278.1 5'-3' exoribonuclease 3-like isoform X1
XLOC_009004	PSS30740.1PI-PLC X domain-containing protein
XLOC_009122	XP_019078086.1 wall-associated receptor kinase 5-like
XLOC_009252	AIA58701.1inducer of CBF expression 2
XLOC_009258	PSR96438.1Indole-3-glycerol phosphate synthase
XLOC_009264	RVX17469.1Rust resistance kinase Lr10
XLOC_009336	XP_011089652.1cytochrome P450 82C2
XLOC_010527	PSS04432.1RNA polymerase sigma factor sigE like
XLOC_010767	---NA---
XLOC_011232	PSS10067.1Transcription factor bHLH91 like
XLOC_011309	PSS08312.1DNA mismatch repair protein
XLOC_011395	XP_021667483.1protein HHL1, chloroplastic isoform X1
XLOC_011485	PSS30239.1hypothetical protein CEY00_Acc05477
XLOC_011944	PSS28715.1Pentatricopeptide repeat-containing protein
XLOC_012027	AFO84075.1ADP glucose pyrophosphorylase
XLOC_012530	PSS33628.1Zinc finger protein like
XLOC_012699	XP_023918028.1uncharacterized membrane protein At3g27390-like isoform X1
XLOC_013281	XP_022748971.1chlorophyllase-2, chloroplastic-like
XLOC_013676	XP_010255389.1 UPF0187 protein At3g61320, chloroplastic isoform X1
XLOC_013725	RVW53285.1 Amidase 1
XLOC_013792	XP_009800822.1 2-oxoisovalerate dehydrogenase subunit alpha 2, mitochondrial
XLOC_013989	PSR96467.1Protein CROWDED NUCLEI like
XLOC_014034	XP_018855229.1 formamidopyrimidine-DNA glycosylase-like isoform X2
XLOC_014174	XP_004138960.1 small EDRK-rich factor 2
XLOC_014180	PSS09409.1Myosin-binding protein 4
XLOC_014395	PSS36262.1Pesticidal crystal protein like
XLOC_014704	XP_002284743.1 thioredoxin-like 4, chloroplastic isoform X1
XLOC_014858	PSS18113.1Von Willebrand factor A domain-containing protein
XLOC_014859	PSS07308.1Polyketide synthase 19
XLOC_015139	PSS30411.1U-box domain-containing protein
XLOC_015286	XP_027174052.1protein qua-1
XLOC_015410	XP_021655000.1ultraviolet-B receptor UVR8-like
XLOC_015546	---NA---
XLOC_015630	PSR93138.1Ultraviolet-B receptor like
XLOC_015827	XP_011095659.1receptor-like protein kinase BRI1-like 3
XLOC_015839	PSS35654.1GPI-anchored adhesin-like protein precursor
XLOC_016263	XP_021652762.1sulfite exporter TauE/SafE family protein 3-like
XLOC_016387	PSS24243.1Cleaved like
XLOC_016394	PSS05951.1Tyrosine-protein like
XLOC_016435	PSS14501.1Protochlorophyllide-dependent translocon component 52 like
XLOC_016753	PSR95080.1UDP-glucose iridoid glucosyltransferase
XLOC_017162	XP_011076174.1remorin-like isoform X1
XLOC_017227	PSS11255.1NAC domain-containing protein
XLOC_017412	PSS29197.1Zinc finger protein like
XLOC_017439	XP_009796024.1 laccase-2-like
XLOC_017690	XP_010653553.1 zinc finger protein JACKDAW
XLOC_017959	XP_006344234.1 chaperone protein DnaJ-like
XLOC_018026	XP_025887399.1protein SRG1-like isoform X1
XLOC_018385	PSR86871.1Plastid-lipid-associated protein
XLOC_019082	XP_022846159.1WD repeat-containing protein 87-like isoform X1
XLOC_019237	RWR88624.1transposon Tf2-1 polyprotein
XLOC_019382	XP_021297401.1magnesium-protoporphyrin IX monomethyl ester [oxidative] cyclase, chloroplastic
XLOC_019728	XP_006381137.2isoamylase 1, chloroplastic isoform X1
XLOC_019989	---NA---
XLOC_020182	XP_002283965.1 putative E3 ubiquitin-protein ligase XBAT31
XLOC_020583	PSS13418.1LRR receptor-like serine/threonine-protein kinase precursor
XLOC_020655	PSS28784.1E3 ubiquitin-protein like
XLOC_020855	PSS28686.1CLE25p like
XLOC_021100	PSS07824.1Protein EDS1B like
XLOC_021101	PSS07824.1Protein EDS1B like
XLOC_021640	PSS01851.1Serine/threonine protein like
XLOC_021665	PSS23968.1Chaperone protein dnaJ 20 like
XLOC_022255	PSS35629.1Tuberculostearic acid methyltransferase
XLOC_022517	---NA---
XLOC_022563	PSS36532.1LRR receptor-like serine/threonine-protein kinase precursor
XLOC_022611	PSR96745.1Haloacid dehalogenase-like hydrolase domain-containing protein
XLOC_022668	PSS13394.1Chaperone protein like
XLOC_022796	PSS04905.1Dammarenediol II synthase
XLOC_022861	PSS30772.1Geraniol 8-hydroxylase
XLOC_023118	XP_011017716.1 putative disease resistance protein At1g50180
XLOC_023121	---NA---
XLOC_023483	RVW97193.1Transposon Tf2-12 polyprotein
XLOC_023490	---NA---
XLOC_023621	PKA51585.1ataxia telangiectasia mutated family protein
XLOC_023675	PSR91310.1Ycf36 family protein
XLOC_023950	PSS13905.1UPF0481 protein
XLOC_024116	XP_009360046.1 starch synthase 3, chloroplastic/amyloplastic-like
XLOC_024195	APQ47392.1AP2/ERF domain-containing transcription factor
XLOC_024282	XP_022942802.1potassium transporter 2
XLOC_024515	---NA---
XLOC_024577	PSR93365.1Microtubule-actin cross-linking factor 1 like
XLOC_025113	---NA---
XLOC_025267	---NA---
XLOC_025268	PSR91655.1Photosynthetic NDH subunit of lumenal location 4 like
XLOC_026098	GAV72695.1HNH domain-containing protein
XLOC_026210	PSS01890.1Titin like
XLOC_026741	---NA---
XLOC_027151	ABO41852.1putative caffeic acid methyltransferase
XLOC_027153	PSR96834.1Factor of DNA methylation like
XLOC_027526	POO01613.1protamine P1 family protein
XLOC_027538	XP_004302101.1PREDICTED: uncharacterized protein LOC101295143
XLOC_027696	PSR95205.1BEL1-like homeodomain protein 8
XLOC_028403	RVW97193.1Transposon Tf2-12 polyprotein
XLOC_029782	XP_017612700.1 growth-regulating factor 9
XLOC_030191	PSR86567.1ABC transporter G family member 3 like
XLOC_030258	PSS02984.1Protein STICHEL-like
XLOC_030288	XP_006424812.1putative E3 ubiquitin-protein ligase XBAT31
XLOC_030558	PSR98806.1LRR receptor-like serine/threonine-protein kinase
XLOC_030864	EOY27419.1Triacylglycerol lipase, putative
XLOC_030937	PSS24561.1Pyrophosphate--fructose 6-phosphate 1-phosphotransferase subunit alpha like
XLOC_031431	PSS14443.1G-type lectin S-receptor-like serine/threonine-protein kinase
XLOC_031466	PSS30436.1Inositol hexakisphosphate and diphosphoinositol-pentakisphosphate kinase
XLOC_031534	OVA17922.1Cytochrome P450
XLOC_031659	XP_015885879.1RNA-dependent RNA polymerase 6
XLOC_031711	XP_018810222.1 probable zinc metallopeptidase EGY3, chloroplastic isoform X1
XLOC_032208	---NA---
XLOC_032962	---NA---
XLOC_033108	PSS00408.1Toll-like receptor 12
XLOC_033575	PSS09365.1Malate:quinone oxidoreductase
XLOC_033593	PSS30343.1Cytochrome P450 94B3 like
XLOC_034213	---NA---
XLOC_034320	RVW38204.1Zinc finger CCCH domain-containing protein 49
XLOC_034776	XP_002281504.4 probable aminotransferase ACS10
XLOC_034912	XP_009786444.1 nucleoporin GLE1-like isoform X1
XLOC_035494	OVA06119.1T-complex 11
XLOC_035574	PSS31812.1Acyl-CoA N-acyltransferase protein
XLOC_035696	PSR88170.1Fasciclin-like arabinogalactan protein
XLOC_035855	PSR96555.1Protein NIM1-INTERACTING 2 like
XLOC_036026	PSR91431.1GTPase
XLOC_036033	RVW42283.1putative disease resistance RPP8-like protein 2
XLOC_036063	XP_015894246.1putative lysozyme-like protein
XLOC_036296	PSR87804.1Transcription factor CYCLOIDEA like
XLOC_036724	PSS16041.1Polyadenylate-binding protein
XLOC_036734	PSS18156.1Protein FAM133B like
XLOC_037107	XP_023906349.1protein NETWORKED 2D isoform X2
XLOC_037192	PSR87600.1WAT1-related protein
XLOC_037196	PSS30400.1WAT1-related protein
XLOC_037710	PSR86282.1Receptor kinase-like protein Xa21, processed
XLOC_037870	ASJ80803.1starch branching enzyme II
XLOC_038582	PRQ31964.1putative RNA-directed DNA polymerase
XLOC_038687	PSS02584.1MADS-box transcription factor
XLOC_038895	PSR92800.1Processed cyclic AMP-responsive element-binding protein 3-like protein
XLOC_038928	XP_010055616.1 remorin
XLOC_039014	PSS14258.1Glucuronoxylan glucuronosyltransferase
XLOC_039132	PSS34645.1UPF0481 protein
XLOC_039258	GAV76641.1Pkinase domain-containing protein/LRR_1 domain-containing protein/LRRNT_2 domain-containing protein
XLOC_039606	PSS33954.1Acyl-CoA-binding domain-containing protein
XLOC_039682	PSS14114.1U-box domain-containing protein
XLOC_039874	XP_021674517.1calmodulin-binding protein 60 A-like isoform X2
XLOC_039955	XP_006422588.1glycerate dehydrogenase
XLOC_040101	RVW79018.1Exonuclease 1
XLOC_040109	Q6Q3H2.1RecName: Full=Valencene synthase; Short=VvVal; AltName: Full=7-epi-alpha-selinene synthase
XLOC_040207	PSR92572.1Protein DETOXIFICATION like
XLOC_040336	GAV68829.1NusB domain-containing protein/Nol1_Nop2_Fmu domain-containing protein
XLOC_040360	KZV21731.1hypothetical protein F511_02889
XLOC_040468	PSS33756.1Serine/threonine-protein kinase
XLOC_040520	PSS08389.1ATP-dependent Clp protease adapter protein
XLOC_040557	PSS01544.1GPN-loop GTPase
XLOC_040942	XP_022885513.1probable LRR receptor-like serine/threonine-protein kinase At4g36180 isoform X1
XLOC_041015	XP_021274984.1F-box protein At3g07870-like
XLOC_041605	PSS33482.1E3 ubiquitin-protein like
XLOC_041617	PSR95762.1Protein LONGIFOLIA like
XLOC_041668	PSR84666.1Rhodanese-like domain-containing protein
XLOC_041880	ACJ37422.1receptor-like serine/threonine kinase
XLOC_042243	PSS01679.1Inactive leucine-rich repeat receptor-like protein kinase
XLOC_042286	PSS17648.1Inter-alpha-trypsin inhibitor heavy chain like
XLOC_042904	PSS01326.1Cadmium/zinc-transporting ATPase
XLOC_043003	PSS01340.1Receptor-like serine/threonine-protein kinase
XLOC_043038	PSR90237.1Protein trichome birefringence like
XLOC_043346	PSR89414.1Chaperone protein like
XLOC_043435	ANN90352.1fructokinase 7
XLOC_043436	RVX06748.1putative ribonuclease H protein
XLOC_043686	AYA60139.1lysine histidine transporter 2
XLOC_043885	PSS20827.1Titin like isoform 1
XLOC_043995	PSR87593.1Potassium transporter like
XLOC_044149	XP_006450099.1AIG2-like protein D
XLOC_044908	XP_010052817.1 MYB-like transcription factor ETC1
XLOC_045310	XP_009788053.1PREDICTED: uncharacterized protein LOC104235919
XLOC_045392	PSS24626.1Leucine-rich repeat receptor-like serine/threonine-protein kinase
XLOC_045699	PSS30499.1Alpha-1,4 glucan phosphorylase L-1 isozyme/amyloplastic like
XLOC_045741	XP_022946608.1cysteine synthase
XLOC_045914	PSS26319.1G-type lectin S-receptor-like serine/threonine-protein kinase
XLOC_045992	---NA---
XLOC_046686	XP_015883711.1N-alpha-acetyltransferase 40
XLOC_046825	PSS28728.1High mobility group protein like
XLOC_047856	PSR98498.11,4-alpha-glucan-branching enzyme 1/amyloplastic like
XLOC_048016	PSS29530.1Plectin like
XLOC_048017	PSS29531.1Zeta-carotene desaturase
XLOC_048026	---NA---
XLOC_048270	XP_010278766.1 L10-interacting MYB domain-containing protein-like isoform X1
XLOC_048272	XP_027119047.1RPM1-interacting protein 4-like isoform X1
XLOC_000774	PSR98553.1Mucin-4 beta chain like
XLOC_001749	PSS20847.1RNA-dependent RNA polymerase 5
XLOC_002176	PSR84613.1Coiled-coil domain-containing protein
XLOC_002284	CBI33714.3unnamed protein product, partial
XLOC_002465	XP_006341626.1 protein ASPARTIC PROTEASE IN GUARD CELL 1-like
XLOC_002918	PSR91032.1RNA-dependent RNA polymerase
XLOC_003426	PSS33800.1StAR-related lipid transfer protein like
XLOC_003477	PSS02871.1Potassium channel AKT2/3 like
XLOC_004357	PSS32610.1Lipid-A-disaccharide synthase
XLOC_005207	PSS06149.1Chloroplastic lipocalin like
XLOC_005309	PSS15721.1Haloacid dehalogenase-like hydrolase domain-containing protein
XLOC_006013	PSS29309.1LRR receptor-like serine/threonine-protein kinase
XLOC_006272	---NA---
XLOC_007570	PSR86256.1CBS domain-containing protein
XLOC_009948	PSS15807.1Inactive leucine-rich repeat receptor-like protein kinase
XLOC_010032	PSS33647.1Solute carrier family 25 member like
XLOC_010669	PSR95322.1Protein like
XLOC_011033	PSR96562.1Cell division cycle-associated 7-like protein
XLOC_011419	RVX12441.1Universal stress protein A-like protein
XLOC_012011	AES87033.2 DUF674 family protein
XLOC_013199	PSS02871.1Potassium channel AKT2/3 like
XLOC_014119	PSS23808.1Protein NRT1/ PTR FAMILY 5.5 like
XLOC_014299	XP_002268416.1 probable protein S-acyltransferase 22
XLOC_015543	RVW93781.1Alpha-glucosidase 2
XLOC_017029	PIN06621.1Protein disulfide-isomerase
XLOC_017074	PSR86452.15'-3' exoribonuclease
XLOC_019242	PSS28672.1Protein WVD2-like
XLOC_020880	PSR93417.1Sucrose-phosphate synthase
XLOC_021109	XP_008374731.1 protein ASPARTIC PROTEASE IN GUARD CELL 1
XLOC_021113	XP_021691170.1aspartyl protease family protein At5g10770-like
XLOC_023529	PSS20837.1Glutamate carboxypeptidase
XLOC_024259	XP_011028995.1 protein disulfide-isomerase LQY1-like
XLOC_024988	PSS31322.1Glucose-1-phosphate adenylyltransferase large subunit/amyloplastic like
XLOC_027368	PSS14433.1Formin-like protein
XLOC_028207	PSS07928.1Photosynthetic NDH subunit of subcomplex B 4 like
XLOC_028391	PSR86522.1Phospholipid:diacylglycerol acyltransferase
XLOC_028637	PSS11572.1Nudix hydrolase
XLOC_029055	XP_002323684.2BTB/POZ domain-containing protein At3g08570
XLOC_029270	PSS04997.1Cytosolic 5'-nucleotidase
XLOC_029538	PSS09473.1Phosphomethylpyrimidine synthase
XLOC_029554	EOY23333.1Sterol regulatory element-binding protein cleavage-activating protein, putative
XLOC_031486	XP_015884922.1receptor-like protein 38
XLOC_031527	PSS04115.1PGR5-like protein
XLOC_033360	XP_003537636.1ferredoxin--NADP reductase, leaf isozyme, chloroplastic
XLOC_033465	XP_022730239.1transcription factor DIVARICATA-like
XLOC_033828	XP_021598891.1coiled-coil domain-containing protein 160-like
XLOC_035307	XP_019074413.1 receptor like protein 30-like
XLOC_036408	RVW48824.1Polypyrimidine tract-binding protein-like 3
XLOC_037712	---NA---
XLOC_039130	PSS34645.1UPF0481 protein
XLOC_039136	PSS32683.1UPF0481 protein
XLOC_041241	PSS17206.1Deoxyuridine 5'-triphosphate nucleotidohydrolase
XLOC_042776	XP_015900492.1F-box/kelch-repeat protein At5g43190
XLOC_042779	PSR93365.1Microtubule-actin cross-linking factor 1 like
XLOC_042804	OVA18455.1Glycoside hydrolase
XLOC_043652	PSS18997.1Leucine-rich repeat receptor-like protein kinase
XLOC_044363	PSS34594.1Rop guanine nucleotide exchange factor like
XLOC_044459	XP_006436740.1protein LOL1 isoform X2
XLOC_045275	XP_023900156.1ABC transporter G family member 5
XLOC_047319	XP_027085733.1heavy metal-associated isoprenylated plant protein 6-like
