# Supplementary material for: Comparing adventitious root-formation and graft-unification abilities in clones of Argania spinosa
Source: Front Plant Sci. 2022 Nov 14;13:1002703. doi: 10.3389/fpls.2022.1002703 (PMC9702570; doi:10.3389/fpls.2022.1002703)
Supplement: Supplementary Table 5 — List of transcripts in the blue zones in Figure 5 . [file Table_5.xlsx]

## Sheet: GROUP A
1294 elements ARS 7 specific rooting A
XLOC_000021	XP_021676317.1probable WRKY transcription factor 28
XLOC_000280	PSR95076.1(+)-gamma-cadinene synthase
XLOC_000281	PSS14217.1Bifunctional lysine-specific demethylase and histidyl-hydroxylase
XLOC_000294	PSS28757.1Phosphate transporter like
XLOC_000327	PSS00218.1Lon protease
XLOC_000346	PSR93602.1Ran-binding protein 1 b like
XLOC_000383	PSS05019.1Pentatricopeptide repeat-containing protein
XLOC_000387	---NA---
XLOC_000440	XP_022927879.1phenylalanine--tRNA ligase beta subunit, cytoplasmic-like isoform X1
XLOC_000461	PSR86806.1THUMP domain-containing protein
XLOC_000462	PSS21622.1Exosome complex component RRP45B like
XLOC_000511	PSS04694.1U3 small nucleolar RNA-associated protein
XLOC_000514	PSS24821.1F-box protein
XLOC_000529	XP_012075619.1ferredoxin--NADP reductase, root-type isozyme, chloroplastic isoform X1
XLOC_000535	XP_011000749.1 methylecgonone reductase-like
XLOC_000570	XP_002267354.1 pentatricopeptide repeat-containing protein At5g66520
XLOC_000582	PSR91090.1Multicopper oxidase
XLOC_000620	PSS14558.1Mitochondrial outer membrane import complex protein like
XLOC_000630	PSS19159.1Polyol transporter like
XLOC_000632	PSR96575.1Phenylalanine--tRNA ligase beta subunit like
XLOC_000646	PSS16145.1L-ascorbate oxidase
XLOC_000668	XP_027061099.1transcription factor JUNGBRUNNEN 1-like
XLOC_000746	PSS24297.1Packaging protein
XLOC_000778	PSS07333.1Mitochondrial import inner membrane translocase subunit TIM23-1 like
XLOC_000809	XP_002271195.1 15.4 kDa class V heat shock protein
XLOC_000875	PSS18258.1Phosphoribosyl-ATP pyrophosphatase
XLOC_000946	PSS04567.1Transducin beta-like protein
XLOC_000952	PSS24610.1OPA3-like protein
XLOC_001014	XP_002280811.1 solute carrier family 25 member 44
XLOC_001032	RVW52940.1putative pentatricopeptide repeat-containing protein
XLOC_001048	PSS09697.1Ethylene-responsive transcription factor
XLOC_001049	XP_008219974.1 putative glutathione-specific gamma-glutamylcyclotransferase 2
XLOC_001125	PSS11309.1Deoxyhypusine synthase
XLOC_001148	XP_027078373.1probable galacturonosyltransferase 9
XLOC_001176	RVW65949.1putative ribonuclease H protein
XLOC_001318	PSR99582.1UPF0307 protein
XLOC_001368	PSS32985.1hypothetical protein CEY00_Acc03281
XLOC_001370	PSS32320.1Nephrocystin-3 like
XLOC_001558	PSS19200.1Pentatricopeptide repeat-containing protein
XLOC_001578	PSS36730.1ATP-dependent RNA helicase
XLOC_001602	PSS33210.1BP28, C-terminal domain protein
XLOC_001603	PSR93304.1Ubiquinol-cytochrome-c reductase complex assembly factor like
XLOC_001614	XP_010270555.1 AT-hook motif nuclear-localized protein 10-like
XLOC_001787	PSS11338.1Ethylene-responsive transcription factor
XLOC_001804	KYP77941.1Retrovirus-related Pol polyprotein from transposon TNT 1-94
XLOC_001812	RVW82609.1Transposon TX1 uncharacterized 149 kDa protein
XLOC_001824	PSS34406.1Rhodanese-like domain-containing protein
XLOC_001835	PSS29158.1Importin-4 like
XLOC_001863	---NA---
XLOC_001885	PSS05791.1STOREKEEPER protein
XLOC_001935	---NA---
XLOC_001945	XP_021274874.1heat shock factor protein HSF24
XLOC_001950	PSS26984.1Glucose-6-phosphate 1-dehydrogenase
XLOC_001957	PSS24626.1Leucine-rich repeat receptor-like serine/threonine-protein kinase
XLOC_001968	---NA---
XLOC_001974	---NA---
XLOC_002177	PSR84612.1Serine carboxypeptidase-like
XLOC_002181	EOY23778.1 Tumor necrosis factor receptor superfamily member 21
XLOC_002245	PSR95581.1Nucleolar complex protein
XLOC_002288	XP_002279517.3 scarecrow-like protein 32
XLOC_002423	XP_011081254.1putative glucuronosyltransferase PGSIP8
XLOC_002498	PSS04426.1Plastid division protein
XLOC_002509	XP_017247923.1 ankyrin repeat-containing protein At3g12360
XLOC_002535	XP_010265711.1PREDICTED: uncharacterized protein LOC104603387
XLOC_002541	XP_002285267.1 glutamate decarboxylase 1
XLOC_002586	---NA---
XLOC_002621	XP_011005924.1 glutamate decarboxylase 1-like
XLOC_002629	PSS21410.1ESF1 like
XLOC_002689	XP_027106009.1probable carbohydrate esterase At4g34215
XLOC_002715	XP_018851376.1 putative DEAD-box ATP-dependent RNA helicase 29
XLOC_002742	XP_020533935.1two-component response regulator ARR9-like
XLOC_002771	PSS11609.1Haloacid dehalogenase-like hydrolase domain-containing protein Sgpp
XLOC_002783	PSR99487.1Inorganic phosphate transporter 1-9 like
XLOC_002851	---NA---
XLOC_002895	XP_010656826.1 probable xyloglucan endotransglucosylase/hydrolase protein 23
XLOC_002898	XP_017222824.1 protein ACCELERATED CELL DEATH 6-like
XLOC_002985	PSS26984.1Glucose-6-phosphate 1-dehydrogenase
XLOC_003004	XP_008337477.1 protein TIC 22-like, chloroplastic
XLOC_003051	---NA---
XLOC_003081	PSS11736.1Synaptotagmin-4 like
XLOC_003116	AFD63133.1senescence-associated protein
XLOC_003152	PSS18037.1Structure-specific endonuclease
XLOC_003236	---NA---
XLOC_003275	AXC25340.1sucrose non-fermenting-1-like protein kinase 2.2
XLOC_003291	PSS21344.1Wall-associated receptor kinase-like
XLOC_003293	PSS30788.1Pentatricopeptide repeat-containing protein
XLOC_003319	RVX17910.1Transcription factor bHLH137
XLOC_003353	XP_027086865.1ras-related protein RABA5a
XLOC_003378	RVW52623.1Transcription factor bHLH137
XLOC_003390	PSR89256.1Plastid-lipid-associated protein
XLOC_003468	PSS13412.1Aspartyl protease family protein
XLOC_003640	XP_023884284.1auxin-responsive protein IAA13-like
XLOC_003646	PSS00232.1Mitochondrial import receptor subunit TOM9-2 like
XLOC_003682	XP_017186733.1 TMV resistance protein N-like
XLOC_003729	PSS20851.1Ethylene-responsive transcription factor TINY like
XLOC_003733	XP_019426244.1 fasciclin-like arabinogalactan protein 11
XLOC_003785	---NA---
XLOC_003828	---NA---
XLOC_003834	---NA---
XLOC_003876	XP_020094864.1pentatricopeptide repeat-containing protein At1g09900-like
XLOC_003898	PSR85244.1Protein TRIGALACTOSYLDIACYLGLYCEROL like
XLOC_003922	XP_022864279.1pleiotropic drug resistance protein 1-like
XLOC_004004	PSS11457.1Transcription factor like
XLOC_004039	XP_021294690.1transcription factor bHLH87 isoform X1
XLOC_004102	PSS30526.1Receptor-like protein kinase
XLOC_004104	PSS12083.1Random slug protein
XLOC_004105	XP_021678688.1E3 ubiquitin-protein ligase ORTHRUS 2-like
XLOC_004159	---NA---
XLOC_004172	PSS24534.1UTP--glucose-1-phosphate uridylyltransferase
XLOC_004186	PSR86416.1Rho-N domain-containing protein
XLOC_004238	XP_006426809.1putative F-box protein At1g49610
XLOC_004250	PSR95708.1Xaa-Pro dipeptidyl-peptidase
XLOC_004258	XP_010271153.1 caffeoylshikimate esterase-like
XLOC_004285	RWR75306.1AP2-like protein ethylene-responsive transcription factor AIL5
XLOC_004401	PSS19214.1PRKR-interacting protein
XLOC_004426	PSS11400.1GMP synthase
XLOC_004484	PSS15858.1DExH-box ATP-dependent RNA helicase
XLOC_004494	---NA---
XLOC_004505	PSR91334.1Carbon catabolite repressor protein
XLOC_004507	PSS01265.128S ribosomal protein
XLOC_004602	PSR95375.1GTP-binding protein BRASSINAZOLE INSENSITIVE PALE GREEN 2 like
XLOC_004617	---NA---
XLOC_004618	PSR84643.1DEAD-box ATP-dependent RNA helicase like
XLOC_004749	XP_009588279.1 cysteine proteinase inhibitor B-like
XLOC_004754	PSS35307.160S ribosomal protein like
XLOC_004764	PSS03995.139S ribosomal protein
XLOC_004770	XP_023871130.13-methyl-2-oxobutanoate hydroxymethyltransferase 1, mitochondrial-like
XLOC_004779	---NA---
XLOC_004853	PSS12083.1Random slug protein
XLOC_004854	PSS31820.1Deoxycytidine kinase
XLOC_004901	PSR98876.1Glycine-rich RNA-binding protein like
XLOC_004908	PSS35257.1Surfeit locus protein like
XLOC_004956	---NA---
XLOC_004961	XP_016563777.1 stress-associated endoplasmic reticulum protein 2-like
XLOC_004962	PSS07666.1Acetolactate synthase
XLOC_005006	XP_022849813.1ethylene-responsive transcription factor ERF014-like
XLOC_005019	PSR86329.1GTP cyclohydrolase
XLOC_005032	PSS13940.1Ubiquitin carboxyl-terminal hydrolase
XLOC_005095	PSR89611.1Two-component response regulator like
XLOC_005149	---NA---
XLOC_005249	PSR96852.1MAR-binding filament-like protein
XLOC_005277	PSS08213.1Pentatricopeptide repeat-containing protein
XLOC_005344	PSS15867.1Solanesyl diphosphate synthase
XLOC_005402	PSR87926.1BTB/POZ and TAZ domain-containing protein
XLOC_005444	PSS05965.1Heat shock protein like
XLOC_005513	XP_020415821.1probable LRR receptor-like serine/threonine-protein kinase At1g07650
XLOC_005539	PSS07806.1Protease Do-like
XLOC_005621	PSS15484.1Protein Brevis radix-like
XLOC_005640	PSR98239.1UDP-glucuronic acid decarboxylase
XLOC_005711	XP_010275912.1 tyrosine/DOPA decarboxylase 2-like
XLOC_005735	XP_017257470.1 dirigent protein 1-like
XLOC_005754	AFJ54352.1WRKY transcription factor
XLOC_005816	RVW25324.1putative xyloglucan endotransglucosylase/hydrolase protein 23
XLOC_005824	PSR89654.1Protein PHYTOCHROME KINASE SUBSTRATE like
XLOC_005847	XP_006358417.1 probable LRR receptor-like serine/threonine-protein kinase At4g08850
XLOC_006032	PSS20979.1Ubiquitin carboxyl-terminal hydrolase
XLOC_006077	XP_010268202.1 60S ribosomal export protein NMD3
XLOC_006099	---NA---
XLOC_006250	PSR95209.1RuBisCO large subunit-binding protein subunit alpha like
XLOC_006314	PSS10403.1Phosphoribosylglycinamide formyltransferase
XLOC_006369	PSR91216.1Protein IDA like
XLOC_006417	PSS07291.140S ribosomal protein like
XLOC_006418	PSS07292.1CCAAT/enhancer-binding protein like
XLOC_006431	XP_024967871.1nuclear transcription factor Y subunit B-3-like
XLOC_006434	XP_010662206.1 DNA-directed RNA polymerases II, IV and V subunit 12
XLOC_006443	GAV72335.1GCK domain-containing protein
XLOC_006466	XP_002263457.1 heat shock 70 kDa protein, mitochondrial isoform X1
XLOC_006486	KVI12481.1Ribosomal protein L19/L19e
XLOC_006538	PSS07595.1Germin-like protein subfamily 3 member 4
XLOC_006709	XP_011010945.1 BAG family molecular chaperone regulator 2
XLOC_006721	---NA---
XLOC_006746	PSS28729.140S ribosomal protein like
XLOC_006760	PSS33013.1S-type anion channel like
XLOC_006845	---NA---
XLOC_006881	XP_010664762.1 protein LTV1 homolog
XLOC_006886	PSS07851.1GATA zinc finger domain-containing protein
XLOC_007009	RVW65502.1Transposon TX1 uncharacterized 149 kDa protein
XLOC_007015	PSS36609.1Legume lectin, beta chain, Mn/Ca-binding site protein
XLOC_007083	XP_012091376.1pentatricopeptide repeat-containing protein At1g61870, mitochondrial
XLOC_007089	PON83508.1hypothetical protein TorRG33x02_206630
XLOC_007175	PIN10458.1Triacylglycerol lipase
XLOC_007229	PSR87495.1adenylate kinase
XLOC_007258	PSS08162.1Transmembrane 9 superfamily member 11 like
XLOC_007289	PSS24860.1Pentatricopeptide repeat-containing protein
XLOC_007375	XP_021297386.1F-box protein At2g32560-like isoform X1
XLOC_007454	XP_021652611.1prostaglandin E synthase 2-like
XLOC_007456	PSR85956.1Limonene hydroxylase
XLOC_007461	GAV65578.1HMA domain-containing protein
XLOC_007462	XP_026380748.1heavy metal-associated isoprenylated plant protein 21-like
XLOC_007465	RWR88474.1putative E3 ubiquitin-protein ligase RHC2A
XLOC_007478	OVA03828.1C2 calcium-dependent membrane targeting
XLOC_007579	PSS09499.1Protein like
XLOC_007580	XP_019075838.1 asparagine synthetase [glutamine-hydrolyzing]-like isoform X1
XLOC_007610	PSS30833.1Replication factor C subunit like
XLOC_007653	---NA---
XLOC_007665	PSS02539.1SUMO-activating enzyme subunit like
XLOC_007672	XP_002276902.2 probable long-chain-alcohol O-fatty-acyltransferase 5
XLOC_007684	XP_015957125.1H/ACA ribonucleoprotein complex subunit 3-like protein
XLOC_007698	PSS24643.1Pentatricopeptide repeat-containing protein
XLOC_007713	PSR85030.1Pentatricopeptide repeat-containing protein
XLOC_007732	PSS35261.1Bromodomain-containing protein
XLOC_007762	---NA---
XLOC_007771	PSS01178.154S ribosomal protein
XLOC_007837	PSS35261.1Bromodomain-containing protein
XLOC_007887	PSS14516.1Large tegument protein like
XLOC_007928	XP_021282206.1peroxidase A2-like
XLOC_007941	XP_027183326.1probable glutathione S-transferase parC
XLOC_007981	XP_008443303.1 50S ribosomal protein L25
XLOC_007999	XP_011047814.1 copper amine oxidase 1-like isoform X1
XLOC_008008	---NA---
XLOC_008024	XP_010049647.1 probable lactoylglutathione lyase, chloroplastic
XLOC_008105	XP_016701538.1 peptidyl-prolyl cis-trans isomerase-like
XLOC_008148	PSS21061.15'-nucleotidase domain-containing protein
XLOC_008194	XP_019156211.1 probable galacturonosyltransferase-like 1
XLOC_008233	XP_002275598.1 E3 ubiquitin protein ligase DRIP2
XLOC_008318	PSS30271.1Shikimate kinase
XLOC_008384	PSR87685.1Pentatricopeptide repeat-containing protein
XLOC_008389	PSS30390.1Large proline-rich protein
XLOC_008438	XP_010102792.1protein PMR5
XLOC_008475	KVH93788.1H/ACA ribonucleoprotein complex, subunit Nhp2, eukaryote
XLOC_008554	XP_010249927.1 nucleolin 2-like isoform X1
XLOC_008588	XP_022634449.1chromatin remodeling protein EBS isoform X1
XLOC_008601	---NA---
XLOC_008604	PSS09519.1Mitoferrin like
XLOC_008636	PSS13653.1Restriction endonuclease type II-like protein
XLOC_008642	XP_015896036.130S ribosomal protein S6 alpha, chloroplastic
XLOC_008655	XP_003632240.1 RING-H2 finger protein ATL34-like
XLOC_008788	XP_002285373.1 protein PPLZ02
XLOC_008801	---NA---
XLOC_008804	PSS33724.1ABC transporter B family member 15 like
XLOC_008809	PIN05436.1Branching enzyme
XLOC_008826	PSS00082.1Protein LAZ1 1 like
XLOC_008880	XP_017226604.1 importin subunit alpha-1a-like
XLOC_008895	PSR95177.1MLO-like protein
XLOC_008947	PSS31596.1Cyclin-D4-1 like
XLOC_008950	XP_017605041.1 cyclin-D3-1-like
XLOC_008975	PSS11177.1Cysteine--tRNA ligase
XLOC_008989	PSS16247.1Indole-3-acetic acid-amido synthetase
XLOC_008993	PSS31625.1Protein EXORDIUM like
XLOC_008999	PSS20728.1Leucine--tRNA ligase
XLOC_009017	PSS33307.1Sorting and assembly machinery component like
XLOC_009038	XP_010048256.1 N-alpha-acetyltransferase 50
XLOC_009039	PSR91816.1Carbon catabolite repressor protein
XLOC_009056	PSS19011.1NADPH-dependent pterin aldehyde reductase
XLOC_009097	XP_021604792.1blue copper protein
XLOC_009121	PSR91016.1Cytochrome P450 CYP736A12 like
XLOC_009161	XP_010263887.1 protein LTV1 homolog
XLOC_009176	GAV68651.1Npa1 domain-containing protein
XLOC_009214	XP_024038716.1RNA demethylase ALKBH5
XLOC_009293	XP_011085320.1ubiquitin domain-containing protein 1 isoform X1
XLOC_009304	PSR98108.1hypothetical protein CEY00_Acc24700
XLOC_009305	PIN13226.1UDP-glucose 4-epimerase/UDP-sulfoquinovose synthase
XLOC_009316	XP_021812178.1protein enabled homolog
XLOC_009400	PSR96225.1Remorin like
XLOC_009417	PSR87551.1RNA-binding, CRM domain protein
XLOC_009440	PSS09475.1Josephin-like protein
XLOC_009441	EOY07493.1 Haloacid dehalogenase-like hydrolase (HAD) superfamily protein
XLOC_009452	OTG18315.1putative FBD domain, Leucine-rich repeat domain, L domain-like protein
XLOC_009453	---NA---
XLOC_009482	PSS21557.1L-ascorbate oxidase
XLOC_009548	XP_020554930.110 kDa chaperonin, mitochondrial
XLOC_009552	XP_024994387.1dihydrolipoyllysine-residue acetyltransferase component 5 of pyruvate dehydrogenase complex, chloroplastic-like isoform X1
XLOC_009579	PON70448.1Heat shock protein 70 family
XLOC_009679	PSR85325.1GDSL esterase/lipase
XLOC_009729	PSR92907.1Homeobox-DDT domain protein
XLOC_009736	PSS07557.1Zinc finger protein
XLOC_009738	XP_011070396.1alcohol dehydrogenase-like 4
XLOC_009800	---NA---
XLOC_009803	PSS11416.1RNA-binding protein
XLOC_009822	PSS11092.150S ribosomal protein like
XLOC_009824	PSS11092.150S ribosomal protein like
XLOC_009826	PSR84767.1Dr1-associated corepressor like
XLOC_009856	PSS36464.1Plant-specific TFIIB-related protein
XLOC_009881	PSS11476.1Transmembrane protein
XLOC_009935	---NA---
XLOC_009941	XP_007042145.1 40S ribosomal protein S25-2
XLOC_009947	PSS01265.128S ribosomal protein
XLOC_009977	PSR95194.1Homeobox-leucine zipper protein like
XLOC_010020	---NA---
XLOC_010038	PSS30303.1Pentatricopeptide repeat-containing protein
XLOC_010069	PSR95770.1Mitochondrial substrate carrier family protein like
XLOC_010182	XP_002284720.1 HMG-Y-related protein A
XLOC_010188	XP_021298040.1probable receptor-like protein kinase At1g33260
XLOC_010213	PSS33922.1TRNA (guanosine(18)-2'-O)-methyltransferase
XLOC_010219	PSS19825.1GRIP domain-containing protein
XLOC_010339	---NA---
XLOC_010370	XP_021897646.1peroxidase 17
XLOC_010393	PSS31467.1Cytochrome P450 81F3 like
XLOC_010398	XP_002285105.1 isoflavone 2'-hydroxylase
XLOC_010455	PSS02997.1LRR receptor-like serine/threonine-protein kinase
XLOC_010492	AXC25340.1sucrose non-fermenting-1-like protein kinase 2.2
XLOC_010510	PSR99925.1Lecithin-cholesterol acyltransferase-like
XLOC_010516	XP_022760182.11,2-dihydroxy-3-keto-5-methylthiopentene dioxygenase 2-like
XLOC_010567	PSS14474.1Protein NUCLEAR FUSION DEFECTIVE 6 like
XLOC_010576	PSS28829.1Pentatricopeptide repeat-containing protein
XLOC_010623	PSR95270.1G-type lectin S-receptor-like serine/threonine-protein kinase
XLOC_010624	XP_021911407.1RING finger protein 11-like
XLOC_010627	XP_022750185.1eukaryotic translation initiation factor 3 subunit L-like isoform X1
XLOC_010642	PSS33818.1Transcription factor like
XLOC_010662	XP_010245344.1 60S ribosomal protein L32-1-like
XLOC_010675	XP_002269170.1 probable WRKY transcription factor 14
XLOC_010814	PSS11836.1Envelope glycoprotein like
XLOC_010845	---NA---
XLOC_010888	---NA---
XLOC_010943	XP_027179166.1protein STRICTOSIDINE SYNTHASE-LIKE 7-like
XLOC_010963	XP_010108888.2protein PLASTID MOVEMENT IMPAIRED 2
XLOC_010985	PSS17239.1Polyadenylate-binding protein
XLOC_010989	PSR85963.1Protein FAR1-RELATED SEQUENCE like
XLOC_010992	PSR94725.1Protein cordon-bleu like
XLOC_010993	PSR94725.1Protein cordon-bleu like
XLOC_010999	PSR94725.1Protein cordon-bleu like
XLOC_011000	PSS06207.1Single-stranded DNA-binding protein
XLOC_011035	XP_010656597.1 transcription factor UNE12 isoform X2
XLOC_011059	KHG20887.1NADH-ubiquinone oxidoreductase chain 5
XLOC_011159	PSS31683.1NAC domain-containing protein
XLOC_011167	PSR95892.1Phox/Bem1p protein
XLOC_011203	PSS36602.1RNA polymerase I-specific transcription initiation factor like
XLOC_011215	PSS02921.1COX assembly mitochondrial protein
XLOC_011250	PSS30092.118S rRNA (guanine-N(7))-methyltransferase
XLOC_011340	PSS05882.1IRK-interacting protein
XLOC_011411	XP_021621122.1dnaJ protein ERDJ3A
XLOC_011442	PSS07895.1RINT1-like protein
XLOC_011471	PSS24919.1Signal peptidase complex subunit 3B like
XLOC_011559	KHG25402.160S ribosomal L4
XLOC_011686	PSS26980.1ATP-dependent tryptophan/phenylalanine/tyrosine adenylase
XLOC_011704	PSS19603.1Double-stranded RNA-binding protein
XLOC_011709	---NA---
XLOC_011727	OVA08115.1RNA recognition motif domain
XLOC_011778	PSR89149.1Pentatricopeptide repeat-containing protein
XLOC_011800	XP_012074326.1testis-expressed protein 10 isoform X1
XLOC_011834	PSR95744.1Pentatricopeptide repeat-containing protein
XLOC_011881	PSS11392.1Disease resistance RPP8-like protein
XLOC_011898	KVH92697.1Nucleotide-binding, alpha-beta plait
XLOC_011899	PSS33685.1Lipoate-protein ligase A
XLOC_011901	PSS26980.1ATP-dependent tryptophan/phenylalanine/tyrosine adenylase
XLOC_011915	RVW79699.1putative xyloglucan endotransglucosylase/hydrolase protein 23
XLOC_012095	---NA---
XLOC_012139	---NA---
XLOC_012144	OVA09919.1Ribosomal protein S12/S23
XLOC_012172	PSS31510.1Xyloglucan glycosyltransferase
XLOC_012194	XP_010258108.1 40S ribosomal protein S19-3
XLOC_012230	XP_017246036.1 40S ribosomal protein S17-4-like
XLOC_012240	PSR88087.1TPR-containing protein
XLOC_012263	XP_023920952.1 copper-transporting ATPase PAA1, chloroplastic-like
XLOC_012335	---NA---
XLOC_012336	---NA---
XLOC_012338	PSR98146.1Pentatricopeptide repeat-containing protein
XLOC_012346	PSS02926.1DExH-box ATP-dependent RNA helicase
XLOC_012367	PSS17810.1PXMP2/4 family protein
XLOC_012371	PSS01887.1Chloroplast processing peptidase
XLOC_012375	PSS15592.1Proline-rich receptor-like protein kinase
XLOC_012396	XP_004141705.1 linoleate 13S-lipoxygenase 3-1, chloroplastic-like
XLOC_012407	PSS24769.1Protein DMR6-LIKE OXYGENASE 2 like
XLOC_012440	PSS24209.1F-box protein
XLOC_012452	PSR84573.1Adenylyl-sulfate kinase
XLOC_012460	PSR91770.1Mitochondrial import inner membrane translocase subunit TIM17-2 like
XLOC_012514	PSS18961.1Protein arginine N-methyltransferase
XLOC_012532	PSR87782.1Protein GLUTAMINE DUMPER like
XLOC_012537	PSR87785.1Pentatricopeptide repeat-containing protein
XLOC_012613	PSS07495.1Auxin-responsive protein
XLOC_012618	---NA---
XLOC_012628	PSS21235.1UPF0553 protein
XLOC_012653	AEE69008.1cinnamyl alcohol dehydrogenase 3
XLOC_012657	PSR95957.1HVA22-like protein
XLOC_012676	PSR89146.1Protein of unknown function DUF4539 protein
XLOC_012711	PSR89692.1Cyclin-dependent kinase
XLOC_012795	PSR86473.1Carbohydrate-responsive element-binding protein
XLOC_012845	XP_027075435.1ruvB-like 2
XLOC_012905	XP_003633023.1 dnaJ homolog subfamily B member 13
XLOC_012922	---NA---
XLOC_012956	XP_020550293.1ABC transporter G family member 53-like
XLOC_013013	PSR96557.1Peptidyl-tRNA hydrolase
XLOC_013051	PSS15822.1Binding partner of like
XLOC_013080	---NA---
XLOC_013082	---NA---
XLOC_013146	EEF28431.1catalytic, putative
XLOC_013159	PSR88048.1Nucleolar protein
XLOC_013162	RVX16817.1Nucleolar protein 6
XLOC_013220	PKA50536.1ataxia telangiectasia mutated family protein
XLOC_013223	EXC26782.1 putative methyltransferase TARBP1
XLOC_013272	---NA---
XLOC_013302	XP_021604837.1phosphoenolpyruvate carboxylase 2 isoform X1
XLOC_013323	XP_022892985.1mitochondrial import inner membrane translocase subunit Tim13-like isoform X1
XLOC_013325	PSS24914.1E3 ubiquitin-protein like
XLOC_013379	---NA---
XLOC_013409	PSR86753.1SUMO-activating enzyme subunit uba-2 like
XLOC_013461	PSS07390.1DNA topoisomerase
XLOC_013479	PSS36491.1Sodium/potassium-transporting ATPase subunit alpha-1 like
XLOC_013512	XP_027351608.1GDSL esterase/lipase At1g29670-like
XLOC_013572	PSS15649.1Chaperone protein like
XLOC_013618	---NA---
XLOC_013619	PSS16407.1Tetratricopeptide repeat protein
XLOC_013625	PSS01501.1Xyloglucan 6-xylosyltransferase
XLOC_013633	PSS19091.1Protein translocase subunit SecA like
XLOC_013653	XP_022847914.140S ribosomal protein S28-2-like
XLOC_013662	XP_002279464.2 DNA repair protein recA homolog 3, mitochondrial
XLOC_013719	PSS24516.12-isopropylmalate synthase
XLOC_013744	PSR96035.1DNA-directed RNA polymerase III subunit rpc6
XLOC_013745	PSR96035.1DNA-directed RNA polymerase III subunit rpc6
XLOC_013863	OTG35096.1 putative DNAJ heat shock N-terminal domain-containing protein
XLOC_013865	PSR92565.1Sperm-associated antigen 1A like
XLOC_013867	PON48915.1Ribosomal protein
XLOC_014058	XP_011070396.1alcohol dehydrogenase-like 4
XLOC_014184	XP_021674520.1snakin-2-like isoform X1
XLOC_014190	XP_010542869.1 N-alpha-acetyltransferase 20-like
XLOC_014201	---NA---
XLOC_014219	---NA---
XLOC_014232	PSS31515.1Glycine--tRNA ligase beta subunit like
XLOC_014280	PSS30567.1Histone acetyltransferase
XLOC_014434	XP_019426773.1 D-3-phosphoglycerate dehydrogenase 2, chloroplastic-like
XLOC_014445	---NA---
XLOC_014450	PSS17336.1DNA gyrase subunit A like
XLOC_014549	PSS07291.140S ribosomal protein like
XLOC_014572	XP_004299654.1 protein EXORDIUM-like
XLOC_014591	PSR95022.1GTP-binding protein EngB
XLOC_014636	PSS17906.1Nuclear pore complex protein like
XLOC_014660	XP_010695041.1 RNA-binding protein 42
XLOC_014683	---NA---
XLOC_014770	PSS01112.1Multiple RNA-binding domain-containing protein
XLOC_014848	AEC32109.1ABC transporter family protein
XLOC_014877	---NA---
XLOC_014900	XP_015886064.1copper transporter 1-like
XLOC_014912	PSR99812.1Receptor protein kinase
XLOC_014942	XP_019178678.1 cytochrome P450 714C2-like
XLOC_014976	XP_008240444.1 tyrosine-specific transport protein
XLOC_015116	PSS32484.1Microtubule-actin cross-linking factor 1, like
XLOC_015181	XP_022948722.1WD repeat-containing protein 20-like
XLOC_015261	PSS36631.1Pre-mRNA-splicing factor 38B like
XLOC_015290	RLN04959.1Retrovirus-related Pol polyprotein LINE-1
XLOC_015455	---NA---
XLOC_015485	XP_012072736.1hydroxymethylglutaryl-CoA lyase, mitochondrial isoform X1
XLOC_015495	RVW76465.1Retrovirus-related Pol polyprotein from transposon 17.6
XLOC_015533	---NA---
XLOC_015583	---NA---
XLOC_015592	PSS24791.1Mediator of RNA polymerase II transcription subunit like
XLOC_015610	XP_002268815.1 ras-related protein RABA1d
XLOC_015614	XP_002285367.1 phospholipase A1-Igamma3, chloroplastic
XLOC_015618	XP_002517015.140S ribosomal protein S15
XLOC_015679	XP_027067649.1mitogen-activated protein kinase kinase kinase 18-like
XLOC_015681	PSR94846.1Flowering locus Ky domain like
XLOC_015690	PSR87782.1Protein GLUTAMINE DUMPER like
XLOC_015697	RVW54172.1CBL-interacting serine/threonine-protein kinase 25
XLOC_015807	PSR87993.1Peptidyl-prolyl cis-trans isomerase
XLOC_015834	XP_017250907.1 DNA-directed RNA polymerase 3, chloroplastic-like
XLOC_015856	XP_010242770.1 ribosome production factor 1-like
XLOC_015879	PSS09923.1U-box domain-containing protein
XLOC_015907	XP_009366918.1 mavicyanin-like
XLOC_015940	XP_006438677.1probable methyltransferase PMT2
XLOC_015989	PSS21772.1Pentatricopeptide repeat-containing protein
XLOC_015998	XP_022743122.1peroxidase A2-like
XLOC_016000	PSR99598.1L10-interacting MYB domain-containing protein
XLOC_016002	PSR99597.1Diphthine methyl ester synthase
XLOC_016005	PSS21566.1Chaperone protein like
XLOC_016026	PSS28860.1Peptide chain release factor PrfB2 like
XLOC_016073	XP_002270321.1 fasciclin-like arabinogalactan protein 17
XLOC_016094	PSS09889.1Arginine biosynthesis bifunctional protein ArgJ beta chain like
XLOC_016119	PSS15589.1Titin like
XLOC_016146	PSR94920.1NHL repeat-containing protein
XLOC_016168	PSS13575.1Protein ALTERED XYLOGLUCAN like
XLOC_016178	PSR89972.1YrdC domain-containing protein
XLOC_016222	PSS09924.1Disease resistance RPP13-like protein
XLOC_016311	PSS31454.1Transcription factor bHLH155 like
XLOC_016334	PSS01342.1Protein ABHD17A like
XLOC_016336	PSS15484.1Protein Brevis radix-like
XLOC_016360	PSS05660.1Pentatricopeptide repeat-containing protein
XLOC_016376	XP_027173997.1respiratory burst oxidase homolog protein E
XLOC_016386	PSS03983.1RRNA-processing protein
XLOC_016417	PSR89744.1Multiple organellar RNA editing factor 2 like
XLOC_016488	XP_010419288.1 CENP-B homolog protein 2-like
XLOC_016491	XP_027090913.1dihydrolipoyllysine-residue acetyltransferase component 5 of pyruvate dehydrogenase complex, chloroplastic-like
XLOC_016528	XP_019242149.1 50S ribosomal protein L28, chloroplastic-like
XLOC_016565	RVW59706.1Granule-bound starch synthase 2, chloroplastic/amyloplastic
XLOC_016666	PSS07879.1Transmembrane protein
XLOC_016743	POO02805.1SMI1/KNR4-like domain containing protein
XLOC_016899	XP_027774821.1protein YELLOW LEAF 1, choloroplastic-like isoform X2
XLOC_016900	---NA---
XLOC_016922	---NA---
XLOC_016966	PIN07534.1putative unusual protein kinase
XLOC_017088	---NA---
XLOC_017112	PSS34432.1Heavy metal-associated isoprenylated plant protein
XLOC_017130	PSS01612.1Cytokinin riboside 5'-monophosphate phosphoribohydrolase
XLOC_017180	XP_009614488.1 defensin J1-2-like
XLOC_017187	PSS19523.1Tryptophan aminotransferase-related protein
XLOC_017199	PSS26773.1Aspartic proteinase
XLOC_017310	KVH54667.1Pyruvate kinase
XLOC_017320	XP_002269464.1 11S globulin seed storage protein 2
XLOC_017404	XP_010652210.1 ATP-dependent RNA helicase DEAH13
XLOC_017429	PSS13503.1ASC1-like protein
XLOC_017458	PSS11483.1ACT domain-containing protein
XLOC_017486	PSR89543.1Argininosuccinate synthase
XLOC_017491	PSR96575.1Phenylalanine--tRNA ligase beta subunit like
XLOC_017571	XP_002265743.1 probable U3 small nucleolar RNA-associated protein 11
XLOC_017574	XP_018831904.1 protein KTI12 homolog
XLOC_017611	XP_027116574.1RNA-binding protein BRN1-like isoform X2
XLOC_017663	XP_002285868.1 replication factor C subunit 3
XLOC_017679	PSS11131.1Transcription termination factor like
XLOC_017685	---NA---
XLOC_017792	PSS26950.1Protein HYPER-SENSITIVITY-RELATED like
XLOC_017796	XP_002269615.1 S-type anion channel SLAH1
XLOC_017812	PSR98576.1CBS domain-containing protein
XLOC_017858	PSS04773.1Lipid-phosphate phosphatase
XLOC_017935	XP_022895563.1glycine-rich RNA-binding protein RZ1A
XLOC_017936	XP_010065540.1 glycine-rich RNA-binding protein RZ1A
XLOC_017957	PSR96284.1Autophagy-related protein
XLOC_017990	XP_027367119.140S ribosomal protein S9-2
XLOC_018038	---NA---
XLOC_018045	AYQ58365.1bifunctional terpenoid synthase/linalool synthase
XLOC_018099	XP_002269464.1 11S globulin seed storage protein 2
XLOC_018156	XP_011085122.1eukaryotic translation initiation factor 3 subunit B
XLOC_018198	PSS01720.1Pentatricopeptide repeat-containing protein
XLOC_018204	PSS14475.126S proteasome non-ATPase regulatory subunit 2 A like
XLOC_018332	PSS33642.1TRNA (guanine(26)-N(2))-dimethyltransferase
XLOC_018374	XP_027061528.1LRR receptor-like serine/threonine-protein kinase
XLOC_018380	PSS00429.1Pentatricopeptide repeat-containing protein
XLOC_018418	---NA---
XLOC_018506	---NA---
XLOC_018511	XP_006437957.1protein KTI12 homolog
XLOC_018522	PSS10253.1Lon protease
XLOC_018670	---NA---
XLOC_018679	XP_012083640.1T-complex protein 1 subunit alpha
XLOC_018722	PSS36712.1Ribosome biogenesis protein
XLOC_018764	PSS32437.1GDP-mannose transporter like
XLOC_018821	XP_021298104.1obg-like ATPase 1
XLOC_018823	PSS29337.1Ethylene-responsive transcription factor
XLOC_018857	XP_010657200.1 protein RRP6-like 3 isoform X1
XLOC_019006	PSS09481.1Anthranilate synthase alpha subunit 2 like
XLOC_019062	PIN17496.1RNA binding/translational regulation protein of the SUA5 family
XLOC_019078	PSS26215.13-hydroxyacyl-[acyl-carrier-protein] dehydratase
XLOC_019107	PSS14474.1Protein NUCLEAR FUSION DEFECTIVE 6 like
XLOC_019205	PSR87871.1DNA double-strand break repair Rad50 ATPase
XLOC_019258	RVW76402.1putative ribonuclease H protein
XLOC_019273	XP_021609595.1expansin-like A2
XLOC_019304	PSS00332.1Protein FAM227A like
XLOC_019348	XP_010274733.1 protection of telomeres protein 1b-like
XLOC_019349	PSR89144.1Zinc finger protein
XLOC_019412	PSR93366.1Peptidyl-prolyl cis-trans isomerase
XLOC_019422	---NA---
XLOC_019434	PSR93372.1Myelin-associated oligodendrocyte basic protein
XLOC_019472	---NA---
XLOC_019487	XP_002283093.1 eukaryotic translation initiation factor 3 subunit A
XLOC_019580	XP_015060115.1RGG repeats nuclear RNA binding protein A-like
XLOC_019590	PSS09947.1U3 small nucleolar ribonucleoprotein
XLOC_019596	XP_021678997.1NAC domain-containing protein 100-like
XLOC_019627	XP_010252457.1 S-type anion channel SLAH1-like
XLOC_019822	XP_006450680.1exosome complex exonuclease RRP46 homolog
XLOC_019848	PSR85424.1Late embryogenesis abundant protein, LEA-14 protein
XLOC_019850	PSR85424.1Late embryogenesis abundant protein, LEA-14 protein
XLOC_019860	PSS02544.1Pentatricopeptide repeat-containing protein
XLOC_019873	XP_002308708.1early nodulin-like protein 1
XLOC_019928	PSS05009.1Activating signal cointegrator 1 like
XLOC_019965	PLY92082.1hypothetical protein LSAT_0X29380
XLOC_020147	AWJ64261.11-phenyethanol synthase 4
XLOC_020190	---NA---
XLOC_020213	KVH94639.1Metallophosphoesterase domain-containing protein
XLOC_020265	PSS28920.1DEAD-box ATP-dependent RNA helicase
XLOC_020269	PSS07647.1RecQ-mediated genome instability protein like
XLOC_020288	XP_012090867.140S ribosomal protein S5
XLOC_020307	PSS23866.1Alpha-ketoglutarate-dependent dioxygenase
XLOC_020325	PSS01524.1WD repeat-containing protein
XLOC_020335	EOY23229.1Ribosomal RNA small subunit methyltransferase E
XLOC_020337	PSS24469.1CUB and sushi domain-containing protein
XLOC_020350	RWR75228.1TBC1 domain-containing protein
XLOC_020369	PSS21538.1Programmed cell death protein 2-like
XLOC_020377	---NA---
XLOC_020442	---NA---
XLOC_020460	PSS11856.1Trihelix transcription factor
XLOC_020464	---NA---
XLOC_020518	PSR86930.1Pentatricopeptide repeat-containing protein
XLOC_020629	XP_010244970.1 LOB domain-containing protein 1-like
XLOC_020633	XP_010241494.1 CMP-sialic acid transporter 2-like
XLOC_020663	XP_023923916.1vinorine synthase-like
XLOC_020669	XP_027102245.1cationic amino acid transporter 1-like
XLOC_020670	XP_010250698.1 50S ribosomal protein L27, chloroplastic
XLOC_020714	RVW56816.1Retrovirus-related Pol polyprotein from transposon TNT 1-94
XLOC_020766	PSR85340.1DEAD-box ATP-dependent RNA helicase
XLOC_020771	PSR95611.1Polyadenylate-binding protein
XLOC_020792	PSR98681.13-oxoacyl-[acyl-carrier-protein] synthase
XLOC_020795	PSR94827.1Peptidyl-prolyl cis-trans isomerase
XLOC_020799	PSS34881.1Elongator complex protein
XLOC_020816	XP_027076009.1STOREKEEPER protein-like
XLOC_020835	XP_002284909.1 malate dehydrogenase, chloroplastic
XLOC_020907	KYP68658.1 Putative low molecular weight protein-tyrosine-phosphatase slr0328 family
XLOC_020928	PSS34618.160S ribosomal protein L35a-1
XLOC_020941	XP_002308708.1early nodulin-like protein 1
XLOC_020960	PSS33471.1Ribosome-recycling factor like
XLOC_020985	PSS00204.1Pentatricopeptide repeat-containing protein
XLOC_020987	PSR89570.1Protein MICRORCHIDIA like
XLOC_021015	XP_002280661.1 protein TOC75-3, chloroplastic
XLOC_021037	AQK94478.1Putative ubiquitin-conjugating enzyme family
XLOC_021038	PSS04422.1Inactive receptor kinase
XLOC_021083	PSR84918.1HTH-type transcriptional regulator SgrR like
XLOC_021149	PSS07267.1Mitogen-activated protein kinase
XLOC_021169	XP_021608465.1probable glutathione S-transferase
XLOC_021193	XP_025982998.1soluble inorganic pyrophosphatase 4 isoform X2
XLOC_021349	PSS26222.1KRR1 small subunit processome component like
XLOC_021350	XP_002264479.1 patellin-6
XLOC_021397	---NA---
XLOC_021428	XP_007034959.2 phospholipase A1-Igamma1, chloroplastic isoform X1
XLOC_021451	---NA---
XLOC_021455	XP_002273221.1 U-box domain-containing protein 43
XLOC_021493	XP_022847992.1protein GRAVITROPIC IN THE LIGHT 1-like
XLOC_021515	XP_027346193.160S ribosomal protein L34-like
XLOC_021534	PSS28541.1SufE-like protein
XLOC_021556	PON56298.1Transmembrane protein
XLOC_021618	PSS09572.1Calcium uniporter protein
XLOC_021686	PSR89564.1Short-chain dehydrogenase
XLOC_021764	RRT74954.1hypothetical protein B296_00004731
XLOC_021776	PSS30443.1Eukaryotic porin/Tom40 protein
XLOC_021846	AGN70869.1O-methyltransferase OMT2
XLOC_021871	PSR98135.1Adenylosuccinate synthetase
XLOC_021914	XP_015885872.1probable sugar phosphate/phosphate translocator At5g25400
XLOC_022065	XP_011094409.1fructose-bisphosphate aldolase 6, cytosolic
XLOC_022086	PSS14184.1Mitoferrin like
XLOC_022206	---NA---
XLOC_022246	XP_011097606.160S ribosomal protein L30-like
XLOC_022267	PSR87508.154S ribosomal protein
XLOC_022320	PSS10269.1hypothetical protein CEY00_Acc17363
XLOC_022408	PSR89394.1Pentatricopeptide repeat-containing protein
XLOC_022437	XP_017638034.1 protease 2 isoform X1
XLOC_022439	XP_011039259.1 uncharacterized membrane protein At3g27390-like
XLOC_022441	XP_004301862.1 prolyl endopeptidase-like
XLOC_022457	---NA---
XLOC_022458	PSS04769.1Polyphenol oxidase
XLOC_022486	PSS24251.1Lipoprotein signal peptidase
XLOC_022491	---NA---
XLOC_022569	PSS31498.1U3 small nucleolar RNA-associated protein
XLOC_022570	---NA---
XLOC_022610	XP_019464470.1 RPM1-interacting protein 4-like
XLOC_022642	PSS31834.1CCA tRNA nucleotidyltransferase
XLOC_022644	XP_027092001.1low-temperature-induced cysteine proteinase
XLOC_022688	XP_016445381.1 isoflavone reductase homolog
XLOC_022691	PSS16298.1H/ACA ribonucleoprotein complex non-core subunit like
XLOC_022753	OMO64056.1Glycosyl transferase, family 8
XLOC_022805	PSS36617.1Uroporphyrinogen-III synthase
XLOC_022863	PSR88007.1Dof zinc finger protein like
XLOC_022868	PSS30772.1Geraniol 8-hydroxylase
XLOC_022870	PSR88007.1Dof zinc finger protein like
XLOC_022935	PSS14289.1Zinc finger CCCH domain-containing protein
XLOC_022944	PSS26212.1Endoplasmic reticulum-Golgi intermediate compartment protein
XLOC_022954	PSS29207.15'-3' exoribonuclease
XLOC_022992	---NA---
XLOC_023019	---NA---
XLOC_023082	PSS31226.1FAD-dependent urate hydroxylase
XLOC_023122	AES62519.260S ribosomal protein L36
XLOC_023154	PSS17969.1Cinnamyl alcohol dehydrogenase
XLOC_023231	PSS33108.1F-box protein like
XLOC_023286	KVI07511.1ATPase, AAA-type, core
XLOC_023290	---NA---
XLOC_023299	PSS15654.1DNA-directed RNA polymerase I subunit 1 like
XLOC_023314	PSS32592.1CASP-like protein
XLOC_023403	EOY24590.1KNOTTED-like homeobox of 7
XLOC_023454	PSS31600.1Serine/threonine-protein kinase-like protein
XLOC_023513	XP_021282206.1peroxidase A2-like
XLOC_023553	PSR86686.1GATA transcription factor
XLOC_023600	XP_012472723.1 uncharacterized membrane protein At1g06890
XLOC_023660	PSS19524.1Choline kinase
XLOC_023672	RVW50771.1hypothetical protein CK203_076865
XLOC_023698	PSR90113.1Uclacyanin-2 like
XLOC_023700	PSR98345.1TRNA modification GTPase
XLOC_023703	XP_017647095.1 KH domain-containing protein At2g38610
XLOC_023704	PSS28706.1Pentatricopeptide repeat-containing protein
XLOC_023715	XP_021666787.1probable terpene synthase 13 isoform X1
XLOC_023743	XP_018848803.1 fasciclin-like arabinogalactan protein 17
XLOC_023751	XP_019260407.1 ATP-dependent Clp protease proteolytic subunit 5, chloroplastic-like
XLOC_023805	PSS33047.1Mediator of RNA polymerase II transcription subunit 36a like
XLOC_023821	---NA---
XLOC_023892	PSS33471.1Ribosome-recycling factor like
XLOC_023915	PSR94729.1GATA transcription factor
XLOC_023928	PSS30816.1Polyol transporter like
XLOC_023974	XP_021887506.1U2 small nuclear ribonucleoprotein A'
XLOC_023996	XP_016497882.1 NDR1/HIN1-Like protein 3-like
XLOC_024113	PSS29389.1Mitochondrial import receptor subunit like
XLOC_024160	XP_022890640.1GDSL esterase/lipase At5g33370-like
XLOC_024173	PSS15435.1Respiratory burst oxidase protein like
XLOC_024193	---NA---
XLOC_024212	---NA---
XLOC_024260	PSR99597.1Diphthine methyl ester synthase
XLOC_024303	PSS29295.1Pathogenesis-related homeodomain protein
XLOC_024318	PSS05856.1Multiple organellar RNA editing factor 8 like
XLOC_024338	PSR84574.1H/ACA ribonucleoprotein complex subunit 1-like protein
XLOC_024493	XP_024967187.140S ribosomal protein S18
XLOC_024588	PSS05684.1Phosphoribosylformylglycinamidine cyclo-ligase
XLOC_024602	---NA---
XLOC_024636	XP_022855032.1dirigent protein 19-like
XLOC_024640	PSR91691.1G-type lectin S-receptor-like serine/threonine-protein kinase
XLOC_024664	XP_019163283.1 protein YLS9
XLOC_024670	XP_023895166.1protein EXORDIUM-like
XLOC_024697	---NA---
XLOC_024798	PSS11836.1Envelope glycoprotein like
XLOC_024800	PSS26957.160S ribosomal protein like
XLOC_024841	XP_027116769.1F-box/kelch-repeat protein At3g23880-like
XLOC_024855	PSS11315.1Early nodulin-like protein
XLOC_024870	---NA---
XLOC_024878	PSS35001.150S ribosomal protein like
XLOC_024897	---NA---
XLOC_024915	PSR85423.1SufE-like protein
XLOC_025036	XP_027099333.1lysM domain receptor-like kinase 3
XLOC_025069	PSS05856.1Multiple organellar RNA editing factor 8 like
XLOC_025075	PSS00153.1DELLA protein
XLOC_025214	XP_024161769.1aquaporin NIP1-1-like
XLOC_025228	XP_027183174.1AT-hook motif nuclear-localized protein 10-like
XLOC_025290	ABC86745.1pollen-specific protein
XLOC_025314	---NA---
XLOC_025357	XP_016713844.1 translationally-controlled tumor protein homolog
XLOC_025376	PSS21164.1Zinc finger AN1 and C2H2 domain-containing stress-associated protein
XLOC_025602	PSR91839.1L-ascorbate peroxidase
XLOC_025614	---NA---
XLOC_025658	PSS31215.1Mechanosensitive ion channel protein
XLOC_025733	PSR96154.160S ribosomal protein like
XLOC_025746	---NA---
XLOC_025749	GAV58140.1DUF4079 domain-containing protein
XLOC_025762	PSS13682.1Non-specific lipid transfer protein GPI-anchored 1 like
XLOC_025797	XP_002271195.1 15.4 kDa class V heat shock protein
XLOC_025804	PSS35317.1Heat shock protein HSP 90-alpha like
XLOC_025812	---NA---
XLOC_025833	ONM57178.160S ribosomal protein L14-1
XLOC_025906	PSS16442.1Prohibitin-1 like
XLOC_025932	PON44715.1nuclear localized protein
XLOC_025944	---NA---
XLOC_026009	PSS09450.128S ribosomal protein
XLOC_026029	XP_008387057.2 bifunctional purine biosynthesis protein PurH-like
XLOC_026231	PSS29340.1Protein disulfide-isomerase
XLOC_026274	---NA---
XLOC_026278	PSS08304.1DEAD-box ATP-dependent RNA helicase
XLOC_026312	PSS09799.1DEAD-box ATP-dependent RNA helicase
XLOC_026322	XP_011001167.1PREDICTED: uncharacterized protein LOC105108532
XLOC_026442	XP_015584505.1nuclear pore complex protein NUP62
XLOC_026511	PSS07911.1Mini zinc finger protein
XLOC_026514	XP_012080548.1mini zinc finger protein 3
XLOC_026708	XP_027164601.1salicylate carboxymethyltransferase-like
XLOC_026766	OTG08247.1putative ribosomal protein S21e
XLOC_026907	XP_021628180.1ABC transporter F family member 4-like
XLOC_026912	PSS19005.1Protein root UVB sensitive like
XLOC_026922	PSR89757.160S ribosomal protein like
XLOC_026971	PSS24121.1P53 and DNA damage-regulated protein
XLOC_026992	XP_018852721.1 pentatricopeptide repeat-containing protein At2g27610-like
XLOC_027027	---NA---
XLOC_027064	KHG06856.1Purine permease 1 -like protein
XLOC_027066	---NA---
XLOC_027074	XP_002281591.1 importin-5
XLOC_027101	XP_021987182.1ras-related protein Rab7
XLOC_027126	XP_004137704.1 proliferation-associated protein 2G4-like
XLOC_027160	PSS19836.1TRNA pseudouridine synthase
XLOC_027162	PSS19836.1TRNA pseudouridine synthase
XLOC_027182	---NA---
XLOC_027196	XP_007222644.12-hydroxyisoflavanone dehydratase
XLOC_027209	PSR87903.1Pentatricopeptide repeat-containing protein
XLOC_027236	PSS33073.1NADH-ubiquinone oxidoreductase
XLOC_027274	PSS33821.1Guanine nucleotide-binding protein subunit gamma 2 like
XLOC_027304	PSS33525.1Ribosomal RNA small subunit methyltransferase
XLOC_027313	PSS06401.1Elongation factor Tu like
XLOC_027320	XP_016436734.1 endo-1,3;1,4-beta-D-glucanase-like
XLOC_027373	PSS16030.1Pentatricopeptide repeat-containing protein
XLOC_027390	PSS12120.1Translation initiation factor IF-3 like
XLOC_027444	---NA---
XLOC_027449	---NA---
XLOC_027580	PSR95201.1Protein CNGC15c like
XLOC_027664	---NA---
XLOC_027742	XP_018821896.1 copper transport protein ATX1
XLOC_027814	PSS30191.1Cytochrome P450 724B1 isoform 1
XLOC_027826	RVW25323.1putative xyloglucan endotransglucosylase/hydrolase protein 23
XLOC_027889	XP_006827706.1NAC domain-containing protein 48
XLOC_027892	PSS16014.1putative GPI-anchored protein
XLOC_027942	PSR93593.1Aspartic protease precursor
XLOC_027945	PSR93593.1Aspartic protease precursor
XLOC_028008	---NA---
XLOC_028040	XP_020224665.1pirin-like protein
XLOC_028068	---NA---
XLOC_028071	PSR91402.1Pre-mRNA-splicing factor 38A like
XLOC_028074	PSR92828.1Acetolactate synthase small subunit 1 like
XLOC_028082	PSS10336.1Transcription factor
XLOC_028088	PSS10336.1Transcription factor
XLOC_028155	XP_011080899.1respiratory burst oxidase homolog protein A
XLOC_028168	RWR89596.1Nucleic acid-binding, OB-fold-like protein
XLOC_028188	BAT72826.1hypothetical protein VIGAN_01026800
XLOC_028222	XP_026663953.1piezo-type mechanosensitive ion channel homolog
XLOC_028234	PSS04483.1Metal-nicotianamine transporter like
XLOC_028235	PSS32292.1ATPase family AAA domain-containing protein
XLOC_028236	XP_019234790.1 AAA-ATPase At2g46620-like
XLOC_028238	XP_015896321.1UPF0160 protein
XLOC_028256	PSS04477.1Oligopeptide transporter like
XLOC_028279	---NA---
XLOC_028293	XP_010048551.1 sodium transporter HKT1
XLOC_028406	PWA65447.1reverse transcriptase zinc-binding domain-containing protein
XLOC_028485	PSS35235.1Polyribonucleotide nucleotidyltransferase
XLOC_028492	PWA90654.1Retrovirus-related Pol polyprotein from transposon TNT 1-94
XLOC_028543	PSS01825.1Pentatricopeptide repeat-containing protein precursor
XLOC_028562	XP_010647688.1 RNA-binding protein 28 isoform X1
XLOC_028586	PSR98576.1CBS domain-containing protein
XLOC_028598	ABC86745.1pollen-specific protein
XLOC_028618	---NA---
XLOC_028697	XP_021636259.1probable methyltransferase PMT24
XLOC_028756	XP_002320889.1homeobox-leucine zipper protein ATHB-7
XLOC_028770	PSS04145.1DEAD-box ATP-dependent RNA helicase
XLOC_028901	XP_021601812.1ribonuclease P protein subunit p25-like protein isoform X1
XLOC_028920	RVX14899.1Zinc transporter 2
XLOC_028926	EXB72469.1Ubiquitin-conjugating enzyme E2 10
XLOC_028967	XP_020549585.1ankyrin repeat-containing protein At5g02620-like isoform X1
XLOC_028981	XP_015959127.1farnesyl pyrophosphate synthase 1 isoform X1
XLOC_028988	---NA---
XLOC_029014	PSS15858.1DExH-box ATP-dependent RNA helicase
XLOC_029040	PSS19381.1Pentatricopeptide repeat-containing protein
XLOC_029043	XP_023882723.1ethylene-responsive transcription factor ERF022-like
XLOC_029060	PSS34784.1BTB/POZ domain-containing protein
XLOC_029113	RVW48070.1Solute carrier family 35 member F1
XLOC_029147	PSS24084.1Biotin synthase
XLOC_029158	XP_012456528.1 eukaryotic translation initiation factor isoform 4E-2-like
XLOC_029165	PSR85460.1WD repeat-containing protein
XLOC_029170	XP_002266909.1 eukaryotic translation initiation factor 3 subunit H
XLOC_029188	PSS09697.1Ethylene-responsive transcription factor
XLOC_029215	XP_009353902.1 acyl-coenzyme A thioesterase 13
XLOC_029259	EOX95512.1S-adenosyl-L-methionine-dependent methyltransferases superfamily protein isoform 1
XLOC_029310	XP_006445884.1notchless protein homolog
XLOC_029342	PSS13824.1Protein arginine N-methyltransferase
XLOC_029402	PSS00094.1Pentatricopeptide repeat-containing protein
XLOC_029411	PSS00170.1GPI-anchored adhesin-like protein precursor
XLOC_029438	XP_017629079.1 dof zinc finger protein DOF1.8-like isoform X1
XLOC_029442	XP_017629079.1 dof zinc finger protein DOF1.8-like isoform X1
XLOC_029562	---NA---
XLOC_029623	AYQ58355.1Hydroxymethylbutenyl diphosphate reductase
XLOC_029674	NP_001238034.1receptor-like protein kinase precursor
XLOC_029690	XP_002281083.2 transcription factor bHLH94
XLOC_029691	PSS24913.1Transcription factor bHLH94 like
XLOC_029752	XP_002281680.1 50S ribosomal protein L31, chloroplastic
XLOC_029756	PSR99656.1Protein translocase subunit SecA like
XLOC_029787	PSS24185.1Ankyrin repeat and zinc finger domain-containing protein
XLOC_029826	PSS10009.1Ras-related protein
XLOC_029927	PSS11135.1Pentatricopeptide repeat-containing protein
XLOC_029969	PSR89063.1Transcription factor BEE like
XLOC_030048	PSS28554.1ABC transporter B family member 15 like
XLOC_030074	PSR88201.1DNA-directed RNA polymerase
XLOC_030075	OMO72217.1Heat shock protein Hsp90
XLOC_030160	PSS15654.1DNA-directed RNA polymerase I subunit 1 like
XLOC_030176	AHL69786.1dehydration-responsive element-binding protein
XLOC_030210	PSS31468.1Metal transporter Nramp2 like
XLOC_030254	PSS21641.1Pentatricopeptide repeat-containing protein
XLOC_030287	XP_010057452.1 H/ACA ribonucleoprotein complex subunit 4
XLOC_030307	AFK31314.1acyl carrier protein
XLOC_030348	PSS00260.118S rRNA (guanine-N(7))-methyltransferase
XLOC_030399	PSS11304.1Nucleoside diphosphate kinase
XLOC_030405	PSS18122.1Protein FLUORESCENT IN BLUE LIGHT like
XLOC_030407	PSR84693.1Pentatricopeptide repeat-containing protein
XLOC_030457	PSR86039.1BTB/POZ domain-containing protein
XLOC_030458	PSS14657.1Monothiol glutaredoxin-S2 like
XLOC_030469	PSR85147.1Transcription termination factor like
XLOC_030492	XP_021663101.1UPF0235 protein At5g63440-like
XLOC_030580	PSS33143.1Molybdenum cofactor sulfurase
XLOC_030588	PSR93379.1Molybdenum cofactor sulfurase
XLOC_030690	PSS32792.1Monothiol glutaredoxin-S15 like
XLOC_030739	---NA---
XLOC_030776	XP_010241669.1 ylmG homolog protein 1-2, chloroplastic-like
XLOC_030780	PON99319.1Guanine nucleotide-binding protein, beta subunit
XLOC_030804	AGH32916.1ketoacyl-ACP synthase I
XLOC_031090	PSS03958.1DEAD-box ATP-dependent RNA helicase
XLOC_031096	XP_023875393.1pentatricopeptide repeat-containing protein At4g01030, mitochondrial
XLOC_031126	XP_006365973.1 pentatricopeptide repeat-containing protein At5g66520-like
XLOC_031163	PSR91565.1Monocopper oxidase-like protein
XLOC_031220	XP_007016838.2 UDP-glycosyltransferase 86A2
XLOC_031502	XP_022849813.1ethylene-responsive transcription factor ERF014-like
XLOC_031594	PSR91450.1Cx9C motif-containing protein
XLOC_031631	PSR91136.1Bystin like
XLOC_031671	XP_016652167.1 S-adenosylmethionine decarboxylase proenzyme
XLOC_031695	PSR95202.1Von Willebrand factor, type A protein
XLOC_031697	OTG26249.1 putative S-adenosyl-L-methionine-dependent methyltransferases superfamily protein
XLOC_031731	RVX10479.1RING-H2 finger protein ATL46
XLOC_031830	PSS21184.1Calcium-binding protein
XLOC_031866	XP_012087010.1UDP-galactose/UDP-glucose transporter 2
XLOC_031884	XP_019077129.1PREDICTED: uncharacterized protein LOC109123012
XLOC_031908	PSS35175.1Prolyl 4-hydroxylase
XLOC_031939	PSS00116.1Ribosome biogenesis protein
XLOC_032034	PSS18150.1Pumilio 23 like
XLOC_032042	XP_011078126.1protein MARD1
XLOC_032047	PSS15444.1Ethylene-responsive transcription factor
XLOC_032079	BAH89267.1putative leucoanthocyanidin reductase
XLOC_032130	PSS13412.1Aspartyl protease family protein
XLOC_032157	PSS03048.1Protein like
XLOC_032174	PSR89144.1Zinc finger protein
XLOC_032202	CCW28006.1carbonic anhydrase
XLOC_032206	PSS33410.1Protease Do-like
XLOC_032265	PSS36602.1RNA polymerase I-specific transcription initiation factor like
XLOC_032273	XP_002311369.1transcription factor MYB108
XLOC_032302	PSS17476.1UPF0758 protein
XLOC_032348	XP_027119023.140S ribosomal protein S24-1-like
XLOC_032389	PSS00365.1hypothetical protein CEY00_Acc24333
XLOC_032431	XP_011070231.1pyruvate kinase isozyme G, chloroplastic
XLOC_032432	PSR91654.1Hsp90 co-chaperone Cdc37, N-terminally processed like
XLOC_032446	PSS17931.1Pentatricopeptide repeat-containing protein
XLOC_032481	XP_012468439.1 WD repeat-containing protein YMR102C-like
XLOC_032543	XP_010246262.1 cold and drought-regulated protein CORA-like
XLOC_032596	XP_018842446.1 preprotein translocase subunit SECE1
XLOC_032650	PSS29282.1Pre-rRNA-processing protein like
XLOC_032661	RVW31997.1putative ribonuclease H protein
XLOC_032682	PSR89540.1Nucleolar protein
XLOC_032708	PSR88407.1Zinc finger protein
XLOC_032709	---NA---
XLOC_032711	XP_017232228.1 GTPase Der
XLOC_032718	XP_015897620.1ammonium transporter 3 member 1-like
XLOC_032720	PSS32704.1Importin subunit beta-1 like
XLOC_032736	---NA---
XLOC_032786	PSS26736.1Nuclear fragile X mental retardation-interacting protein 1, conserved domain protein
XLOC_032792	ARU79081.1beta-glucosidase 3 GH3 family
XLOC_032830	---NA---
XLOC_032850	PSS36675.1Cyclin-D2-1 like
XLOC_032947	PSS23728.1Nuclear transcription factor Y subunit B-8 like
XLOC_033004	PSS19458.1Calcium-binding protein CML44
XLOC_033047	PSS21348.1Odorant receptor 98a like
XLOC_033049	XP_025014305.1GDP-mannose transporter GONST2 isoform X2
XLOC_033054	XP_018828618.1 LOB domain-containing protein 12
XLOC_033079	XP_024037936.1ERBB-3 BINDING PROTEIN 1 isoform X2
XLOC_033134	XP_011071078.1probable LRR receptor-like serine/threonine-protein kinase At1g12460
XLOC_033260	RVW82230.1DExH-box ATP-dependent RNA helicase DExH6
XLOC_033281	PSS26132.1Glutamyl-tRNA(Gln) amidotransferase subunit A like
XLOC_033294	AZL19539.1transcription factor GRAS2
XLOC_033300	XP_017229533.1 peroxidase 17
XLOC_033361	PSS29936.1Glycine-rich protein
XLOC_033479	XP_009616412.1 microtubule-associated protein 1B-like
XLOC_033522	PON79718.1Cyclophilin-type peptidyl-prolyl cis-trans isomerase
XLOC_033523	ADJ67438.1ethylene response factor 9
XLOC_033537	PSS30531.1Protein COBRA like
XLOC_033579	PSS00413.1IAA-amino acid hydrolase ILR1-like
XLOC_033583	XP_016686789.1 aspartyl protease AED3-like
XLOC_033602	PSR96278.1ATP synthase gamma chain like
XLOC_033603	XP_015899802.1protein AMN1 homolog
XLOC_033604	---NA---
XLOC_033618	PSR91803.1Molybdate transporter like
XLOC_033639	RVW37206.1Plastid division protein PDV1
XLOC_033654	---NA---
XLOC_033673	XP_011094806.160S ribosomal protein L23A
XLOC_033721	EEF51628.1 cyclin-dependent protein kinase, putative
XLOC_033809	XP_027098028.1protein JINGUBANG-like
XLOC_033919	PSS24736.1Topoisomerase I damage affected protein
XLOC_033933	BAT09488.1 Os09g0568400
XLOC_033939	RVW23511.1Phospholipase D Z
XLOC_033940	PSS20956.1BTB/POZ domain-containing protein
XLOC_033960	PSS02654.1DNA double-strand break repair Rad50 ATPase
XLOC_033981	PSS35638.1DNA topoisomerase
XLOC_034026	PSR91884.1L10-interacting MYB domain-containing protein
XLOC_034046	PSS33771.1Ethylene-responsive transcription factor
XLOC_034122	---NA---
XLOC_034200	PSS35048.1OTU domain-containing protein
XLOC_034224	PSS11543.1Phosphatidylserine decarboxylase 1 alpha chain like
XLOC_034229	PSS02745.1Cyclin-dependent kinase 5 activator 2 like
XLOC_034246	PSS24240.1UDP-D-xylose:L-fucose alpha-1,3-D-xylosyltransferase
XLOC_034384	PSS04332.1DNA-directed RNA polymerase
XLOC_034403	PSS31782.1Phosphatidylinositol 4-phosphate 5-kinase
XLOC_034409	GAV75397.1DUF3411 domain-containing protein
XLOC_034459	PSR98439.1Cysteine-rich receptor-like protein kinase
XLOC_034519	PSR96184.1Mitochondrial import inner membrane translocase subunit TIM23-2 like
XLOC_034544	XP_020534225.1glycine-rich RNA-binding protein 2 isoform X2
XLOC_034572	PSS11715.1Methenyltetrahydrofolate cyclohydrolase
XLOC_034579	XP_019185637.1 mitochondrial uncoupling protein 5
XLOC_034581	---NA---
XLOC_034584	PSR95038.1Protein FLX-like
XLOC_034592	PSS07949.1LRR receptor-like serine/threonine-protein kinase
XLOC_034663	RWR75163.160S ribosomal protein L21-1
XLOC_034676	XP_019156211.1 probable galacturonosyltransferase-like 1
XLOC_034688	XP_011074591.1subtilisin-like protease SBT1.9
XLOC_034830	---NA---
XLOC_034846	---NA---
XLOC_034853	---NA---
XLOC_034944	---NA---
XLOC_034991	PSR88298.1Leucine-rich repeat receptor-like protein kinase
XLOC_035014	PSR89832.1NDR1/HIN1-Like protein
XLOC_035025	PSS20819.1ATP-binding cassette sub-family G member like
XLOC_035030	---NA---
XLOC_035040	PSS00401.1GDP-fucose protein O-fucosyltransferase protein
XLOC_035050	XP_017219258.1 calnexin homolog
XLOC_035131	KVH88755.1Ribosomal protein S19A/S15e
XLOC_035136	XP_002270439.2 pentatricopeptide repeat-containing protein At1g04840
XLOC_035186	---NA---
XLOC_035232	---NA---
XLOC_035298	---NA---
XLOC_035300	---NA---
XLOC_035396	PSS21673.1TMV resistance protein like
XLOC_035407	PSR86387.1Chaperonin CPN60-2 like
XLOC_035468	PSR99979.1Nitrate reductase
XLOC_035472	PSS02617.1Protein kinase
XLOC_035476	PSS21822.1Nucleolar complex protein 4 B like
XLOC_035623	ADQ91847.1 late embryogenesis abundant protein group 8 protein
XLOC_035637	PSS35745.1U5 small nuclear ribonucleoprotein
XLOC_035669	XP_023894074.1WD repeat-containing protein 43
XLOC_035672	PSS06476.1RRP15-like protein
XLOC_035674	PSR89573.1Anthranilate phosphoribosyltransferase
XLOC_035703	---NA---
XLOC_035709	---NA---
XLOC_035715	PSS19390.1Queuine tRNA-ribosyltransferase accessory subunit like
XLOC_035738	XP_024923258.1dirigent protein 22-like isoform X1
XLOC_035770	XP_017232593.1 glyoxylate/hydroxypyruvate reductase HPR3-like
XLOC_035776	PSS04077.1Vacuolar-processing enzyme like
XLOC_035825	PSS11839.1Transcription termination factor like
XLOC_035826	PSS35932.1Homeobox-leucine zipper protein
XLOC_035878	OMO86104.1Ctr copper transporter
XLOC_035879	EOY33887.1Copper transporter, putative
XLOC_035997	PSS34657.1Mitochondrial inner membrane protease
XLOC_036050	PSS29037.1IRK-interacting protein
XLOC_036053	PSS13780.1Dirigent protein
XLOC_036101	PSS17805.1Protein ANTI-SILENCING like
XLOC_036170	XP_018820478.1 protein DETOXIFICATION 49-like
XLOC_036174	PHT45354.140S ribosomal protein S15a
XLOC_036211	---NA---
XLOC_036219	EOY33511.1Low molecular weight protein-tyrosine-phosphatase slr0328
XLOC_036256	XP_021653740.1uncharacterized protein LOC110645052 isoform X1
XLOC_036338	XP_023734008.1putative UPF0481 protein At3g02645
XLOC_036367	XP_010652717.1 probable N-acetyltransferase HLS1
XLOC_036373	PSR86116.1Protein-S-isoprenylcysteine O-methyltransferase
XLOC_036381	---NA---
XLOC_036394	PSS13950.11-acyl-sn-glycerol-3-phosphate acyltransferase
XLOC_036405	PSS10148.1Cation/calcium exchanger like
XLOC_036447	---NA---
XLOC_036517	XP_022736670.1putative 12-oxophytodienoate reductase 11 isoform X1
XLOC_036533	XP_002268815.1 ras-related protein RABA1d
XLOC_036895	---NA---
XLOC_036964	AGX26650.1S-adenosyl-l-homocysteine hydrolase A
XLOC_036965	XP_008457222.1 serine hydroxymethyltransferase 4
XLOC_036972	---NA---
XLOC_036993	PSR86552.1Transcription factor FER-LIKE IRON DEFICIENCY-INDUCED TRANSCRIPTION FACTOR like
XLOC_037044	XP_010047816.1 F-box/kelch-repeat protein At1g55270
XLOC_037258	PSS18088.1Midasin like
XLOC_037263	PSS14503.1Glucan endo-1,3-beta-glucosidase
XLOC_037288	AES73827.1 plant/F12B17-70 protein
XLOC_037313	XP_022142972.1NHP2-like protein 1
XLOC_037337	XP_018847221.1 NHP2-like protein 1
XLOC_037340	RVW59707.1Mini zinc finger protein 2
XLOC_037381	XP_018628968.1 CENP-B homolog protein 2-like
XLOC_037387	PSR88087.1TPR-containing protein
XLOC_037433	PSS35235.1Polyribonucleotide nucleotidyltransferase
XLOC_037473	PIN24016.140S ribosomal protein S11
XLOC_037489	XP_023895920.1uclacyanin 1-like
XLOC_037521	XP_002266745.1 protein PHYTOCHROME KINASE SUBSTRATE 4
XLOC_037551	XP_022883956.1uncharacterized protein LOC111400787
XLOC_037600	PON93269.1hypothetical protein TorRG33x02_108400
XLOC_037604	PSS26212.1Endoplasmic reticulum-Golgi intermediate compartment protein
XLOC_037620	PSS24267.12-oxoglutarate-dependent dioxygenase
XLOC_037669	XP_002285467.2 AP2-like ethylene-responsive transcription factor ANT
XLOC_037683	PSS20840.1RRNA methyltransferase
XLOC_037697	PSR95939.1Serine/threonine-protein kinase
XLOC_037702	XP_021286319.1E3 ubiquitin-protein ligase ORTHRUS 2 isoform X1
XLOC_037721	XP_015898602.1F-box protein PP2-A15
XLOC_037732	PSS35633.1Serine/threonine-protein kinase
XLOC_037745	PSS01804.1Cytoplasmic tRNA 2-thiolation protein
XLOC_037883	---NA---
XLOC_037896	---NA---
XLOC_037916	XP_022939524.1alkylated DNA repair protein alkB homolog 8-like isoform X3
XLOC_037920	XP_017976233.1 protein translocase subunit SecA isoform X1
XLOC_037969	PSS03095.1GDSL esterase/lipase
XLOC_038063	---NA---
XLOC_038129	XP_015936113.1L-ascorbate oxidase homolog
XLOC_038263	XP_024982788.1E3 ubiquitin-protein ligase UPL4 isoform X4
XLOC_038301	XP_024182044.1monothiol glutaredoxin-S15, mitochondrial
XLOC_038313	PSS23923.1Cysteine proteinase inhibitor B like
XLOC_038450	PON41953.1X8 domain containing protein
XLOC_038454	XP_022715811.1ras-related protein RABA1f
XLOC_038481	KCW85782.1hypothetical protein EUGRSUZ_B02533
XLOC_038505	XP_010243010.1 T-complex protein 1 subunit gamma
XLOC_038558	XP_018818501.1 nucleolar protein 14
XLOC_038599	PSR96103.1Protein CDI like
XLOC_038607	PSR96103.1Protein CDI like
XLOC_038610	XP_011012371.1 60S ribosomal protein L24-like
XLOC_038655	---NA---
XLOC_038657	XP_002279361.1 RNA cytidine acetyltransferase 1
XLOC_038751	PSR90226.1Pentatricopeptide repeat-containing protein
XLOC_038784	OMO74715.1Late embryogenesis abundant protein, LEA-14
XLOC_038808	PSS33336.1Eukaryotic translation initiation factor 3 subunit F like
XLOC_038820	XP_019164863.1 probable U3 small nucleolar RNA-associated protein 7
XLOC_038889	PSS21313.1Serine--tRNA ligase
XLOC_038904	---NA---
XLOC_039033	XP_008236399.1 protein NUCLEAR FUSION DEFECTIVE 6, chloroplastic/mitochondrial-like isoform X2
XLOC_039053	XP_010240943.1 protein YLS9
XLOC_039069	GAV67003.1Cellulose_synt domain-containing protein
XLOC_039074	XP_019224682.1 probable galacturonosyltransferase 11
XLOC_039115	PSR91734.1Pectin acetylesterase
XLOC_039164	XP_023927662.1putative clathrin assembly protein At5g35200
XLOC_039165	PSS20944.1N-alpha-acetyltransferase 35, NatC auxiliary subunit like
XLOC_039184	EOY25097.1Heat shock protein 70 (Hsp 70) family protein
XLOC_039188	XP_012086670.1luminal-binding protein 5
XLOC_039219	PSS24392.1F-box protein
XLOC_039405	PSS05907.12-oxoglutarate-dependent dioxygenase
XLOC_039627	PSS26472.1TRNA-dihydrouridine(20/20a) synthase
XLOC_039716	PSS24581.1Zinc finger protein
XLOC_039816	PSS14541.1Dicarboxylate transporter 1 like
XLOC_039821	PSR91639.1AT-hook motif nuclear-localized protein
XLOC_039825	PSR89232.1AAA ATPase forming ring-shaped complexes like
XLOC_039875	---NA---
XLOC_039885	OMO89127.1Aspartate/glutamate/uridylate kinase
XLOC_040163	PSS30608.13-oxoacyl-[acyl-carrier-protein] synthase
XLOC_040211	PSS29505.1Pentatricopeptide repeat-containing protein
XLOC_040213	PSS25995.1Glycine-rich protein
XLOC_040224	XP_017217816.1 auxin transporter-like protein 2
XLOC_040362	PSR96532.1Guanine nucleotide-binding protein subunit beta-like protein
XLOC_040406	---NA---
XLOC_040435	XP_008229974.1 probable WRKY transcription factor 31
XLOC_040501	PSS06235.1Potassium transporter like
XLOC_040556	XP_024461812.1peroxidase 40
XLOC_040661	AFH56414.1ethylene response factor 7
XLOC_040695	---NA---
XLOC_040763	PSR88189.1Cytochrome P450 CYP749A22 like
XLOC_040785	PSS34662.1Thylakoid ADP,ATP carrier protein
XLOC_040807	RVW30089.1Pentatricopeptide repeat-containing protein, chloroplastic
XLOC_040816	XP_023904318.1ELMO domain-containing protein B
XLOC_040842	XP_008343848.1 inorganic phosphate transporter 1-11-like
XLOC_040955	PSS35205.1Zinc finger protein
XLOC_041032	PSR99537.1Cytoplasmic tRNA 2-thiolation protein
XLOC_041038	PSR96414.1Pathogen-related protein
XLOC_041221	PSS29500.1Pollen-specific protein-like
XLOC_041262	PSS26546.1Protein CURVATURE THYLAKOID 1D like
XLOC_041275	PSS11979.1Box C/D snoRNA protein
XLOC_041300	PSS28511.1Pentatricopeptide repeat-containing protein
XLOC_041301	PON44879.1Alpha/Beta hydrolase fold containing protein
XLOC_041349	XP_021977913.1anthranilate synthase alpha subunit 2, chloroplastic
XLOC_041356	PSR98274.1Splicing factor 3B subunit like
XLOC_041409	PSS16212.1Receptor-like protein kinase THESEUS
XLOC_041412	PSS16212.1Receptor-like protein kinase THESEUS
XLOC_041437	PSR99558.1FAD-dependent urate hydroxylase
XLOC_041495	PSS11931.1Molybdate-anion transporter like
XLOC_041571	PSS32980.1WD repeat-containing protein
XLOC_041658	KVH97804.1Aminoacyl-tRNA synthetase, class II
XLOC_041678	PSS13769.1IQ domain-containing protein
XLOC_041711	XP_020235524.1MOB kinase activator-like 1A
XLOC_041721	PSS29029.1GDSL esterase/lipase
XLOC_041726	PSR94871.1Mitochondrial import inner membrane translocase subunit TIM44-2 like
XLOC_041745	XP_002277045.1 zinc finger protein WIP3
XLOC_041755	XP_006423029.1protein disulfide-isomerase SCO2
XLOC_041854	PSS10012.1Chaperone protein like
XLOC_041875	PON76576.1ubiquitin hydrolase
XLOC_041879	---NA---
XLOC_042009	---NA---
XLOC_042037	XP_010256760.1 NHP2-like protein 1
XLOC_042070	PSR88145.1Transmembrane protein
XLOC_042084	RVW60315.1Non-functional NADPH-dependent codeinone reductase 2
XLOC_042172	PSR91706.1Isoflavone reductase
XLOC_042180	PSS33053.1Transporter arsB like
XLOC_042182	RVX01909.1Mitogen-activated protein kinase kinase kinase YODA
XLOC_042188	AYA73392.1WRKY transcription factor 48
XLOC_042210	PSS00475.1Vacuolar protein
XLOC_042212	PSS34597.1Sushi, nidogen and EGF-like domain-containing protein
XLOC_042240	PSS35944.1Nuclear pore complex protein
XLOC_042297	PSR95890.1Copper methylamine oxidase
XLOC_042303	PSS24898.1Pentatricopeptide repeat-containing protein
XLOC_042368	RVX21636.1putative ribonuclease H protein
XLOC_042431	XP_024157220.1probable serine/threonine-protein kinase abkC
XLOC_042446	---NA---
XLOC_042447	---NA---
XLOC_042478	PHT93071.1Mitotic spindle-associated MMXD complex subunit MIP18
XLOC_042501	XP_022998926.1MAPK kinase substrate protein At1g80180-like
XLOC_042512	PSR89377.1Zinc transporter like
XLOC_042517	PSS16342.1Trihelix transcription factor
XLOC_042586	PSS11313.1Mitochondrial inner membrane protein
XLOC_042671	PSS01936.1Profilin-2 like
XLOC_042709	XP_023871741.1alpha-L-fucosidase 2 isoform X1
XLOC_042739	---NA---
XLOC_042744	---NA---
XLOC_042766	---NA---
XLOC_042794	PSS33850.1Homocysteine S-methyltransferase
XLOC_042797	PSS01430.1Acyl-CoA N-acyltransferase protein
XLOC_042822	XP_018817832.1 ribosome biogenesis protein BOP1 homolog
XLOC_042825	XP_023916938.1protein NYNRIN-like
XLOC_042840	XP_022879645.1probable LRR receptor-like serine/threonine-protein kinase At1g07650 isoform X3
XLOC_042856	XP_022890640.1GDSL esterase/lipase At5g33370-like
XLOC_042873	---NA---
XLOC_043047	PSR89570.1Protein MICRORCHIDIA like
XLOC_043082	XP_006431263.1lamin-like protein
XLOC_043123	XP_021279911.1beta-xylosidase/alpha-L-arabinofuranosidase 2-like isoform X1
XLOC_043214	RVW35761.1hypothetical protein CK203_082540
XLOC_043222	XP_027180108.1DNA-directed RNA polymerase III subunit RPC5 isoform X1
XLOC_043253	PSS20819.1ATP-binding cassette sub-family G member like
XLOC_043359	---NA---
XLOC_043382	PSS17882.1Periodic tryptophan protein
XLOC_043530	PSS16028.1STOREKEEPER protein
XLOC_043534	PSR86015.1CSC1-like protein
XLOC_043554	PIN03784.1Sof1-like rRNA processing protein (contains WD40 repeats)
XLOC_043584	PSR89564.1Short-chain dehydrogenase
XLOC_043619	PSS10336.1Transcription factor
XLOC_043684	XP_011070832.1myb family transcription factor EFM
XLOC_043749	XP_022890640.1GDSL esterase/lipase At5g33370-like
XLOC_043774	XP_002282169.1 ethylene-responsive transcription factor ERF109
XLOC_043802	PSS26851.1Threonine--tRNA ligase
XLOC_043870	XP_011086135.1probable serine/threonine-protein kinase abkC isoform X1
XLOC_043886	XP_022882625.1thioredoxin-like 2, chloroplastic
XLOC_044026	PSS06283.1Ubiquitin-protein like
XLOC_044043	---NA---
XLOC_044094	PSS17754.1Peptidyl-prolyl cis-trans isomerase
XLOC_044110	XP_019080826.1 proline-, glutamic acid- and leucine-rich protein 1
XLOC_044140	RVW28566.1hypothetical protein CK203_094797
XLOC_044200	PSS02765.1DNA polymerase
XLOC_044229	EOX99418.1DTW domain-containing protein isoform 1
XLOC_044264	PSS08156.1DNA-directed RNA polymerases II, IV and V subunit 8B like
XLOC_044265	PSS10061.1Lactate utilization protein like
XLOC_044285	XP_022879975.1H/ACA ribonucleoprotein complex subunit 2-like protein
XLOC_044349	PSS33596.140S ribosomal protein
XLOC_044359	---NA---
XLOC_044370	AIR71833.1diacylglycerol kinase 3
XLOC_044390	PSS36516.150S ribosomal protein like
XLOC_044439	XP_023644488.1 CENP-B homolog protein 2-like
XLOC_044504	XP_006420899.160S ribosomal protein L13a-4 isoform X1
XLOC_044581	PSS20785.1Phospholipid:diacylglycerol acyltransferase
XLOC_044665	KHG18845.1 Ribonucleoside-diphosphate reductase subunit beta
XLOC_044705	KVH97573.1Aminotransferase, class I/classII
XLOC_044709	PSR84560.1E3 ubiquitin-protein like
XLOC_044729	ANN22415.1photolyase/blue-light receptor 2
XLOC_044733	XP_015968986.160S ribosomal protein L18
XLOC_044737	NP_001305503.1magnesium/proton exchanger
XLOC_044787	PSS06270.1Calcium and calcium/calmodulin-dependent serine/threonine-protein kinase
XLOC_044871	PSS21287.1Guanine nucleotide-binding protein like
XLOC_044896	---NA---
XLOC_044897	PSS28915.1Pentatricopeptide repeat-containing protein
XLOC_045028	XP_022868828.1ferruginol synthase-like
XLOC_045031	RVX00988.1Geraniol 8-hydroxylase
XLOC_045048	XP_027104975.1GATA transcription factor 8-like
XLOC_045057	PSS14727.1BZIP transcription factor
XLOC_045107	XP_022760080.1ribonuclease 3-like protein 3
XLOC_045111	XP_024950263.1lysM domain receptor-like kinase 3 isoform X1
XLOC_045119	PSR93286.1U6 snRNA phosphodiesterase
XLOC_045147	PSR98204.1Mediator of RNA polymerase II transcription subunit like
XLOC_045161	PSR87907.1DEAD-box ATP-dependent RNA helicase
XLOC_045186	PSS33210.1BP28, C-terminal domain protein
XLOC_045198	PSS26772.1DExH-box ATP-dependent RNA helicase
XLOC_045271	PSR96133.1Pentatricopeptide repeat-containing protein
XLOC_045284	RXH92335.1hypothetical protein DVH24_033231
XLOC_045311	PSR87469.1Ras guanine nucleotide exchange factor S like
XLOC_045346	PSS36351.130S ribosomal protein
XLOC_045352	PSS31458.1Isoaspartyl peptidase/L-asparaginase 2 subunit beta like
XLOC_045405	XP_021860480.1tubulin beta chain
XLOC_045486	XP_024156919.1cysteine-rich receptor-like protein kinase 29
XLOC_045545	XP_021604358.1queuine tRNA-ribosyltransferase catalytic subunit 1-like
XLOC_045589	---NA---
XLOC_045677	GAV78930.1PPR domain-containing protein/PPR_2 domain-containing protein/DYW_deaminase domain-containing protein
XLOC_045680	PSR98597.1Nucleic acid-binding, OB-fold protein
XLOC_045711	XP_002273241.1 serine/threonine-protein kinase D6PK
XLOC_045713	XP_009798819.1 COP9 signalosome complex subunit 7 isoform X1
XLOC_045857	PSS28657.1DEAD-box ATP-dependent RNA helicase
XLOC_045862	XP_002276086.2 protein BIG GRAIN 1-like A
XLOC_045909	PSS04361.1SKP1-like protein
XLOC_045916	PSS24278.1E3 ubiquitin-protein like
XLOC_045977	PSS11383.1Phosphoglycerate mutase-like protein
XLOC_046016	PSS00500.1Protein CHAPERONE-LIKE PROTEIN OF like
XLOC_046021	PSS04617.1WD repeat-containing protein
XLOC_046230	---NA---
XLOC_046299	XP_019158931.1 calcium-binding protein PBP1-like
XLOC_046314	PSS01297.1Ribosomal protein
XLOC_046316	PSS35266.1Zinc finger CCCH domain-containing protein
XLOC_046329	PSS05856.1Multiple organellar RNA editing factor 8 like
XLOC_046344	PSS32796.1Glycine-rich RNA-binding protein
XLOC_046356	PSR89807.1Protein root UVB sensitive like
XLOC_046422	PSS07547.130S ribosomal protein
XLOC_046423	RVX13964.1putative ribonuclease H protein
XLOC_046433	PSR89512.1Peter Pan-like protein
XLOC_046444	PSS18125.1Peroxisomal (S)-2-hydroxy-acid oxidase
XLOC_046506	PSS09616.1Ras-related protein like
XLOC_046590	PSS01421.1Hsp70-Hsp90 organizing protein
XLOC_046602	PSS18066.1Chaperonin CPN60-like
XLOC_046609	XP_021633612.1CMP-sialic acid transporter 3-like isoform X1
XLOC_046621	---NA---
XLOC_046651	PSS24740.1B-box zinc finger protein
XLOC_046679	XP_019080826.1 proline-, glutamic acid- and leucine-rich protein 1
XLOC_046703	---NA---
XLOC_046704	---NA---
XLOC_046830	XP_010274527.1 40S ribosomal protein S9-2-like
XLOC_046842	PSS13524.1Protein PHYTOCHROME KINASE SUBSTRATE like
XLOC_046956	PSR92653.1Sodium/hydrogen exchanger 2 like
XLOC_046980	PSS36434.1BTB/POZ domain-containing protein
XLOC_046983	---NA---
XLOC_047059	PSR94944.1Cytochrome P450 82C4 like
XLOC_047092	PSS24841.1UMP-CMP kinase
XLOC_047199	PSR92832.1Translin like
XLOC_047294	XP_015582346.1protein-S-isoprenylcysteine O-methyltransferase A isoform X1
XLOC_047342	PSS30218.1Glucan 1,3-alpha-glucosidase
XLOC_047435	XP_003632455.1 dof zinc finger protein DOF3.4
XLOC_047443	PSR84962.1Cyclin-D1-binding protein
XLOC_047540	---NA---
XLOC_047559	XP_008362771.1 probable auxin efflux carrier component 1b
XLOC_047596	PSS07400.1(-)-isopiperitenol/(-)-carveol dehydrogenase
XLOC_047619	RVW91711.1Transcription factor bHLH14
XLOC_047641	PSS32812.1SNF2 domain-containing protein
XLOC_047687	PSS21637.1UPF0182 protein
XLOC_047706	XP_010908558.2 adenosylhomocysteinase
XLOC_047727	PSR96142.1NADP-dependent malic enzyme like
XLOC_047737	PSS09767.1MMS19 nucleotide excision repair protein
XLOC_047769	XP_004140509.1 plasminogen activator inhibitor 1 RNA-binding protein-like
XLOC_047788	PSS36280.1RRNA biogenesis protein
XLOC_047829	XP_027335885.1endoplasmic reticulum oxidoreductin-1-like isoform X1
XLOC_047831	PSS31515.1Glycine--tRNA ligase beta subunit like
XLOC_047850	XP_023923665.1ATP-dependent Clp protease proteolytic subunit 6, chloroplastic-like isoform X1
XLOC_047864	ANB66341.1MYC2 trancriptor
XLOC_047873	PSS34353.1AT-hook motif nuclear-localized protein
XLOC_047900	PSS29260.1Angiogenin-2 like
XLOC_047974	XP_007041678.2 expansin-like A1
XLOC_047975	PRQ25089.1putative expansin/Lol pI
XLOC_047989	---NA---
XLOC_048009	PNX78660.1isoflavone reductase-like protein
XLOC_048034	PSS01738.1Pentatricopeptide repeat-containing protein
XLOC_048066	PSS24275.1Growth-regulating factor like
XLOC_048138	---NA---
XLOC_048296	XP_023917890.1protein BIG GRAIN 1-like E
XLOC_048321	AYP70949.1xyloglucan endotransglucosylase 11

## Sheet: GROUP B
1147 elements ARS 7 specific rooting B
XLOC_000004	RHN43924.1 putative Transposase-associated domain-containing protein
XLOC_000062	---NA---
XLOC_000123	---NA---
XLOC_000156	GAV92798.1Exo_endo_phos domain-containing protein/DUF4283 domain-containing protein/zf-CCHC_4 domain-containing protein
XLOC_000172	XP_015877165.1probable E3 ubiquitin-protein ligase HIP1
XLOC_000263	PSS07534.1Calcineurin subunit B like
XLOC_000273	---NA---
XLOC_000313	---NA---
XLOC_000540	XP_011000749.1 methylecgonone reductase-like
XLOC_000561	---NA---
XLOC_000735	---NA---
XLOC_000750	PSS24303.1Rop guanine nucleotide exchange factor like
XLOC_000917	XP_007201954.1AAA-ATPase At3g50940
XLOC_000921	---NA---
XLOC_001008	XP_023879597.1auxin-responsive protein SAUR50-like
XLOC_001028	XP_024443832.1probable LRR receptor-like serine/threonine-protein kinase At1g53440 isoform X2
XLOC_001063	XP_002268278.2 indole-3-acetic acid-amido synthetase GH3.17
XLOC_001079	XP_012835642.1 cyclic nucleotide-gated ion channel 1
XLOC_001080	RWR94899.1ataxia telangiectasia mutated family protein
XLOC_001123	PSS34564.13-ketoacyl-CoA synthase
XLOC_001141	XP_011028420.1 putative cell division cycle ATPase
XLOC_001214	---NA---
XLOC_001227	PSR91508.1Osmotin-like protein
XLOC_001232	PSR91508.1Osmotin-like protein
XLOC_001281	OMP09983.1Glycine rich protein
XLOC_001310	PSS30515.1Phenolic glucoside malonyltransferase
XLOC_001323	PSS17964.1Chaperone protein dnaJ 11 like
XLOC_001339	PSR85956.1Limonene hydroxylase
XLOC_001355	XP_017413812.1 translationally-controlled tumor protein homolog
XLOC_001408	XP_019237100.1 17.3 kDa class II heat shock protein-like
XLOC_001454	PSS17591.1Nucleotide-diphospho-sugar transferase protein
XLOC_001527	PSS20928.1Equilibrative nucleotide transporter like
XLOC_001539	---NA---
XLOC_001625	---NA---
XLOC_001640	---NA---
XLOC_001673	PSS35995.1Organellar oligopeptidase
XLOC_001697	PSS07579.1Metal transporter Nramp1 like
XLOC_001760	---NA---
XLOC_001775	PSS31305.1Cysteine protease RD21B precursor
XLOC_001813	PSS09926.1Hydroxyproline O-arabinosyltransferase
XLOC_001820	---NA---
XLOC_001829	AYW01724.1persimmon protein WRKY7
XLOC_001865	PSS01249.1Nuclear poly(A) polymerase
XLOC_001888	XP_006469729.1cysteine-rich repeat secretory protein 38
XLOC_001890	XP_002279520.1 light-inducible protein CPRF2
XLOC_002000	PSR96394.1Transcription factor like
XLOC_002002	PIM98540.1hypothetical protein CDL12_28977
XLOC_002303	XP_004505784.2actin-depolymerizing factor 5
XLOC_002385	BAW35440.1desiccation-related protein
XLOC_002436	---NA---
XLOC_002482	OMO73365.1glutamate-gated kainate-type ion channel receptor subunit GluR5
XLOC_002560	XP_023768554.1RNA pseudouridine synthase 4, mitochondrial
XLOC_002569	PSS26069.1Nucleoredoxin 1-1 like
XLOC_002589	PSS35245.1Cyclin-dependent protein kinase
XLOC_002595	---NA---
XLOC_002634	ADW77255.1CLE01 protein
XLOC_002643	RVW68297.1putative ribonuclease H protein
XLOC_002655	---NA---
XLOC_002691	PSS02685.1Leucine-rich repeat receptor protein kinase
XLOC_002786	PSR99487.1Inorganic phosphate transporter 1-9 like
XLOC_002808	AYA73281.1UDP-glucose 6-dehydrogenase
XLOC_002820	PSS28540.1GDSL esterase/lipase
XLOC_002840	PSR98574.1Stem-specific protein
XLOC_002991	PSS21343.1Vacuolar protein sorting-associated protein like
XLOC_002999	PSS04020.1Ankyrin repeat-containing protein
XLOC_003001	PSS04020.1Ankyrin repeat-containing protein
XLOC_003078	XP_015381506.2oligopeptide transporter 5-like
XLOC_003079	XP_002276053.1 geraniol 8-hydroxylase-like
XLOC_003083	XP_002276053.1 geraniol 8-hydroxylase-like
XLOC_003114	XP_023923297.1receptor-like protein 9DC3
XLOC_003115	RVW37573.1Receptor like protein 42
XLOC_003210	AYW01724.1persimmon protein WRKY7
XLOC_003211	PSR98712.1Receptor kinase-like protein Xa21, processed
XLOC_003286	XP_011092107.1topless-related protein 3
XLOC_003334	XP_021614075.1homeobox-leucine zipper protein HAT22-like
XLOC_003343	PSR88287.1UV excision repair protein
XLOC_003461	PSS04666.1MO25-like protein
XLOC_003478	PSS19046.1Receptor-like protein kinase
XLOC_003503	---NA---
XLOC_003506	PSS01253.1Beta-fructofuranosidase, insoluble isoenzyme like
XLOC_003560	---NA---
XLOC_003561	---NA---
XLOC_003643	PSR97921.1Futsch light chain LC(f) like
XLOC_003669	PSR89303.1Phosphonates import ATP-binding protein like
XLOC_003673	PSR91814.1Pleiotropic drug resistance protein
XLOC_003714	PSS01910.1Sugar transport protein
XLOC_003727	PSS01908.1E3 ubiquitin-protein like
XLOC_003730	PSR92847.1E3 ubiquitin ligase SUD1
XLOC_003734	XP_009781290.1 zinc finger protein JACKDAW-like isoform X1
XLOC_003769	XP_020264310.1hydrophobic protein RCI2A-like
XLOC_003799	PSS07269.1Tyrosine-sulfated glycopeptide receptor like
XLOC_003861	PSS04781.1Stem-specific protein
XLOC_003870	PSR93160.17-deoxyloganetic acid glucosyltransferase
XLOC_003918	PSS12136.1NAC domain-containing protein
XLOC_004019	KHG13052.1RING finger and CHY zinc finger domain-containing 1
XLOC_004029	XP_002313339.1heterogeneous nuclear ribonucleoprotein H
XLOC_004042	PSS11793.1Binding partner of like
XLOC_004082	PSS36320.13,9-dihydroxypterocarpan 6A-monooxygenase
XLOC_004088	PSS26961.1REF/SRPP-like protein
XLOC_004096	XP_020264310.1hydrophobic protein RCI2A-like
XLOC_004129	PSR87725.1Protein RIK like
XLOC_004199	XP_027061503.1 gluconokinase-like
XLOC_004202	---NA---
XLOC_004226	PSS04490.1CDPK-related kinase
XLOC_004236	XP_011031763.1 tetraspanin-6-like
XLOC_004270	---NA---
XLOC_004271	PSS19465.12-oxoisovalerate dehydrogenase subunit alpha 2 like
XLOC_004319	XP_027068715.1ferredoxin-dependent glutamate synthase, chloroplastic
XLOC_004322	XP_008340696.1 cell wall / vacuolar inhibitor of fructosidase 1-like
XLOC_004324	PSR92489.1Cell wall / vacuolar inhibitor of fructosidase
XLOC_004410	XP_022885264.1probable xyloglucan endotransglucosylase/hydrolase protein B
XLOC_004490	PSR96906.1PRA1 family protein
XLOC_004495	EXB93554.1 Armadillo btb protein 1
XLOC_004574	---NA---
XLOC_004593	PON85601.1Transmembrane protein
XLOC_004610	PSS30135.1WEB family protein
XLOC_004612	XP_017247814.1 14-3-3-like protein
XLOC_004655	XP_006489476.1putative calcium-transporting ATPase 13, plasma membrane-type
XLOC_004715	RVW56398.1putative LRR receptor-like serine/threonine-protein kinase
XLOC_004771	PSS24231.1Proline iminopeptidase
XLOC_004836	PSS09939.1Annexin like
XLOC_004842	PSR97911.1Glutamine--fructose-6-phosphate aminotransferase
XLOC_004866	XP_002274108.2 major allergen Pru ar 1
XLOC_004945	XP_010272278.1 oligoribonuclease
XLOC_004975	PSS33389.1Aquaporin PIP2-5 like
XLOC_005005	XP_006421592.1hexose carrier protein HEX6
XLOC_005070	PSS29130.1Magnesium transporter MRS2-4 like
XLOC_005122	XP_010250720.1 F-box protein At1g67340
XLOC_005123	---NA---
XLOC_005150	---NA---
XLOC_005169	XP_024193669.1plant intracellular Ras-group-related LRR protein 6-like
XLOC_005174	PSS34619.1Neutral ceramidase
XLOC_005184	XP_023921942.1thaumatin-like protein 1
XLOC_005210	PSS32884.1Heavy metal-associated isoprenylated plant protein
XLOC_005212	XP_020206729.1 sm-like protein LSM4
XLOC_005214	---NA---
XLOC_005270	PSS29240.1Sphingolipid transporter spinster like
XLOC_005271	PSS29240.1Sphingolipid transporter spinster like
XLOC_005287	---NA---
XLOC_005342	---NA---
XLOC_005405	PSS21227.1Adenylyl-sulfate kinase
XLOC_005482	PSR95781.1Plant intracellular Ras-group-related LRR protein
XLOC_005505	XP_023928794.1protein TIC 62, chloroplastic-like
XLOC_005535	PSR99519.1Vinorine synthase
XLOC_005659	PSR99812.1Receptor protein kinase
XLOC_005666	PSS02560.1Protein DMR6-LIKE OXYGENASE 2 like
XLOC_005788	---NA---
XLOC_005870	XP_011013002.1 calcium and calcium/calmodulin-dependent serine/threonine-protein kinase-like
XLOC_005933	PSS33205.1Serine/threonine-protein kinase
XLOC_005969	---NA---
XLOC_006058	PSS30307.1Acyltransferase-like protein
XLOC_006078	XP_018813021.1PREDICTED: uncharacterized protein LOC108985259
XLOC_006128	PSS30004.1Serine/threonine-protein kinase
XLOC_006235	AJU57229.1bidirectional sugar transport SWEET 2b
XLOC_006310	EXC20307.1Shaggy-related protein kinase epsilon
XLOC_006321	XP_021619135.1dormancy-associated protein homolog 3-like isoform X2
XLOC_006395	PSR91785.1Casein kinase 1-like protein
XLOC_006477	XP_009627791.1 protein SRC2 homolog
XLOC_006493	XP_021283269.1ADP-ribosylation factor-like protein 6-interacting protein 4 isoform X1
XLOC_006587	PSS36006.1Transcription factor bHLH74 like
XLOC_006643	XP_021818283.1F-box protein At1g67340-like
XLOC_006666	---NA---
XLOC_006692	PSR86033.1Rho GTPase-activating protein
XLOC_006723	XP_006478124.2protein ALP1-like
XLOC_006758	PSS33019.1Late embryogenesis abundant protein
XLOC_006817	PSS14657.1Monothiol glutaredoxin-S2 like
XLOC_006820	---NA---
XLOC_006827	PSR89530.1Ethylene response sensor like
XLOC_006835	PSS00348.1RNA-binding protein ARP1
XLOC_006847	XP_010532662.1 casein kinase 1-like protein 10
XLOC_006932	PSS04312.1Transcription factor like
XLOC_006990	PSR92806.1Protein PHR1-LIKE like
XLOC_006994	---NA---
XLOC_007016	PSS30105.1Legume lectin domain protein
XLOC_007027	---NA---
XLOC_007100	XP_002270037.3 abscisic acid receptor PYL8
XLOC_007114	PSS33789.11-aminocyclopropane-1-carboxylate oxidase
XLOC_007118	PRQ36507.1putative deacetoxyvindoline 4-hydroxylase
XLOC_007139	RVW55117.1hypothetical protein CK203_066974
XLOC_007156	---NA---
XLOC_007188	PSR98257.1Membrane-associated protein like
XLOC_007237	XP_023758194.1oxygen-dependent coproporphyrinogen-III oxidase, chloroplastic
XLOC_007240	NP_001234403.1basic 30 kDa endochitinase precursor
XLOC_007242	NP_001234403.1basic 30 kDa endochitinase precursor
XLOC_007283	PSR86012.1Protein DOWNY MILDEW RESISTANCE like
XLOC_007291	PSS35803.1Uclacyanin-3 like
XLOC_007293	---NA---
XLOC_007329	AML76450.1putative LOV domain-containing protein
XLOC_007412	GAV58262.1NmrA domain-containing protein
XLOC_007445	PSR93154.1Pecanex-like protein
XLOC_007512	---NA---
XLOC_007533	XP_010255273.1PREDICTED: uncharacterized protein LOC104596004
XLOC_007538	PSS26756.1E3 ubiquitin-protein like
XLOC_007569	PSS14156.1Transmembrane protein
XLOC_007582	PSR86185.1Mitogen-activated protein kinase kinase kinase
XLOC_007614	AJO70169.1alpha,alpha-trehalose-phosphate synthase 10
XLOC_007630	PSS36448.1UPF0496 protein
XLOC_007642	XP_022752792.1ankyrin repeat-containing protein At5g02620-like
XLOC_007677	PSS31409.1Succinate dehydrogenase subunit 5 like
XLOC_007767	PQM35318.1cationic amino acid transporter 4 vacuolar
XLOC_007811	PSS17398.1MDIS1-interacting receptor like kinase
XLOC_007825	PSR87898.1Thaumatin-like protein
XLOC_007827	PSS34960.1Chaperone protein like
XLOC_007849	PSS04865.1LRR receptor-like serine/threonine-protein kinase
XLOC_007889	RVW52705.1D-tagatose-1,6-bisphosphate aldolase subunit GatY
XLOC_008089	---NA---
XLOC_008098	PSR84593.1TVP38/TMEM64 family membrane protein like
XLOC_008129	XP_017623196.1 peroxidase 43
XLOC_008229	PSS06329.1GABA transporter like
XLOC_008242	PSS28805.1Cyclic nucleotide-gated ion channel like
XLOC_008324	---NA---
XLOC_008331	---NA---
XLOC_008334	XP_006364318.1 trans-resveratrol di-O-methyltransferase-like isoform X1
XLOC_008337	AZL19357.11-aminocyclopropane-1-carboxylate oxidase 7
XLOC_008405	XP_022941216.14-hydroxyphenylpyruvate dioxygenase
XLOC_008465	XP_022718998.1germin-like protein subfamily 1 member 13
XLOC_008510	PSS29303.1Methylthioribose kinase
XLOC_008550	PSS31219.1Phospholipase D delta like
XLOC_008553	PSS31219.1Phospholipase D delta like
XLOC_008609	PON94578.1Transmembrane protein
XLOC_008615	XP_016899632.1 L10-interacting MYB domain-containing protein-like isoform X2
XLOC_008657	PSS30718.1Cytochrome P450 81E8 like
XLOC_008665	PSR95175.1MLO-like protein
XLOC_008681	XP_022717272.1EP1-like glycoprotein 2
XLOC_008725	---NA---
XLOC_008726	---NA---
XLOC_008765	PSS31540.1Phosphoglycerate mutase-like protein
XLOC_008772	---NA---
XLOC_008821	PSS30844.1suppressor of gene silencing like protein
XLOC_008873	AAP80667.1ribosomal Pr 117
XLOC_008930	GAV71885.1TPT domain-containing protein
XLOC_008965	PSR98655.1Cyclin-D-binding Myb-like transcription factor
XLOC_009120	XP_016647154.1 keratin, type I cytoskeletal 9-like
XLOC_009129	PHU05650.140S ribosomal protein S14
XLOC_009148	PSS04128.1SPX domain-containing membrane protein
XLOC_009198	PSS00350.1Protein PIN-LIKES like
XLOC_009205	RWR94185.1Ribosomal protein S4e
XLOC_009294	AJO70168.1alpha,alpha-trehalose-phosphate synthase 7
XLOC_009335	---NA---
XLOC_009343	PSS16128.1Cellulose synthase-like protein
XLOC_009348	PSR85040.1Protein NRT1/ PTR FAMILY 2.13 like
XLOC_009405	OMO91759.1Late embryogenesis abundant protein, LEA-14
XLOC_009566	CAG27609.1monosaccharide transporter
XLOC_009574	PSS31284.1Xylanolytic transcriptional activator xlnR like
XLOC_009608	---NA---
XLOC_009670	---NA---
XLOC_009672	RVW60359.1Uncharacterized protein CK203_089859
XLOC_009703	PSS31445.1Ethylene-responsive transcription factor RAP2-10 like
XLOC_009820	PSR98586.1DNA mismatch repair protein like
XLOC_009864	XP_020219590.1auxin-responsive protein SAUR50-like
XLOC_009914	PSS34540.1Nucleoredoxin 3
XLOC_009951	---NA---
XLOC_009953	XP_012841084.1 transmembrane protein 208-like
XLOC_010008	XP_002272420.1 WUSCHEL-related homeobox 8
XLOC_010011	XP_023912042.1U-box domain-containing protein 44-like
XLOC_010034	PSS30525.1Receptor-like protein kinase
XLOC_010037	PSS30522.1Receptor-like protein kinase
XLOC_010156	PSS10261.1Ammonium transporter 1 member like
XLOC_010222	PIN08191.1Hismacro and SEC14 domain-containing protein
XLOC_010274	---NA---
XLOC_010342	---NA---
XLOC_010373	XP_006447697.1cold and drought-regulated protein CORA
XLOC_010431	XP_010272799.1 aminoacylase-1
XLOC_010470	XP_006420839.1protein DMR6-LIKE OXYGENASE 2
XLOC_010473	PSS02804.1RING-H2 finger protein
XLOC_010495	AVZ45844.16-hydroxynicotinate 3-monooxygenase
XLOC_010508	XP_002517383.1xyloglucan glycosyltransferase 4
XLOC_010564	XP_019464447.1 protein Brevis radix-like 4
XLOC_010594	PSR93492.1Peptidyl-prolyl cis-trans isomerase-like
XLOC_010635	PSS06006.1Galactinol--sucrose galactosyltransferase
XLOC_010663	PSR88326.1DEAD-box ATP-dependent RNA helicase
XLOC_010665	PSS34256.1Rust resistance kinase
XLOC_010722	PSS33789.11-aminocyclopropane-1-carboxylate oxidase
XLOC_010726	PSR91738.1Cytochrome P450 711A1 like
XLOC_010752	AYA60150.1vacuolar amino acid transporter 5
XLOC_010794	XP_022964437.1phosphatidylinositol 4-phosphate 5-kinase 9-like
XLOC_010817	PSS09924.1Disease resistance RPP13-like protein
XLOC_010818	PSS09939.1Annexin like
XLOC_010820	PSS09924.1Disease resistance RPP13-like protein
XLOC_010841	RWR73979.1pathogenesis-related protein PRB1-3-like protein
XLOC_010854	PSS13872.1TBC1 domain family member 15 like
XLOC_010918	PSS14204.1NAD(P)H dehydrogenaseFQR1-like
XLOC_010944	XP_021603818.1cytochrome P450 87A3-like
XLOC_010953	XP_007050467.2 calcium-transporting ATPase 12, plasma membrane-type
XLOC_010971	---NA---
XLOC_011056	AYA60141.1lysine histidine transporter 4
XLOC_011114	PSS04315.1Protein ECERIFERUM like
XLOC_011126	XP_024020267.1aspartyl protease APCB1
XLOC_011137	PSR99511.1Serine/threonine-protein kinase Cx32 precursor
XLOC_011166	PSR95894.1Plant intracellular Ras-group-related LRR protein
XLOC_011236	---NA---
XLOC_011251	XP_002273748.1 protein PNS1
XLOC_011270	XP_008244246.1 heat stress transcription factor B-3
XLOC_011290	XP_018806305.1 vinorine synthase-like
XLOC_011394	XP_012843987.1 F-box protein PP2-A13-like
XLOC_011414	XP_010262126.1 transmembrane 9 superfamily member 7-like
XLOC_011467	---NA---
XLOC_011620	PSS17757.1Hydroxyproline O-galactosyltransferase
XLOC_011641	PSS36611.1Legume lectin, beta chain, Mn/Ca-binding site protein
XLOC_011688	---NA---
XLOC_011691	PSS21002.1NEDD8 ultimate buster like
XLOC_011781	PON41654.1Translation elongation factor
XLOC_011838	PSS17495.1ATP-binding cassette sub-family A member like
XLOC_011839	XP_010648452.1 L-arabinokinase
XLOC_012010	PSS31248.1Thaumatin-like protein
XLOC_012023	XP_002266744.1 probable glutathione S-transferase
XLOC_012034	PSS31855.1DNA helicase
XLOC_012073	---NA---
XLOC_012083	XP_012480130.1 dnaJ homolog subfamily B member 2 isoform X2
XLOC_012093	XP_016573477.1 WAT1-related protein At1g09380-like
XLOC_012127	PSS11480.1Zinc finger A20 and AN1 domain-containing stress-associated protein
XLOC_012128	XP_002265050.1 basic form of pathogenesis-related protein 1
XLOC_012141	XP_017257081.1 endo-1,4-beta-xylanase A-like
XLOC_012182	PSS28924.1Berberine bridge enzyme-like
XLOC_012202	---NA---
XLOC_012203	PSS02639.1G patch domain-containing protein
XLOC_012212	PSS19212.1Sodium/proton antiporter 1 like
XLOC_012287	XP_002512007.1probable acyl-activating enzyme 17, peroxisomal
XLOC_012344	PON92892.1PPR containing protein
XLOC_012475	PSR87828.1Plastidic glucose transporter like
XLOC_012570	XP_010256947.1 peroxidase 4-like
XLOC_012574	---NA---
XLOC_012641	PSR84781.1Remorin like
XLOC_012648	PSR93609.1Ankyrin repeat-containing protein
XLOC_012692	XP_002284542.1 ras-related protein RHN1 isoform X1
XLOC_012754	XP_021294378.1hybrid signal transduction protein dokA
XLOC_012919	XP_027116262.1mavicyanin-like isoform X1
XLOC_012937	XP_023876889.1BTB/POZ and TAZ domain-containing protein 3
XLOC_012969	PSR86190.1Zinc transporter 6 like
XLOC_012983	AOY34426.1transcription factor BHLH055
XLOC_013021	XP_027149766.1UDP-glycosyltransferase 91C1-like
XLOC_013076	NP_001267991.1R2R3 transcription factor MYB108-like protein 1
XLOC_013083	XP_010053609.1 protein HAIKU1
XLOC_013115	XP_002276804.1 UDP-glycosyltransferase 83A1
XLOC_013197	PSR99943.1Squalene monooxygenase
XLOC_013339	XP_019178678.1 cytochrome P450 714C2-like
XLOC_013357	XP_021676721.1probable glutathione S-transferase
XLOC_013368	XP_021676721.1probable glutathione S-transferase
XLOC_013399	XP_010048489.1 L-arabinokinase
XLOC_013450	---NA---
XLOC_013463	RVX17519.1putative nucleoredoxin 3
XLOC_013485	PSS01470.1Prolyl 4-hydroxylase
XLOC_013578	PSS11512.1Trehalose-phosphate phosphatase
XLOC_013602	PSS35635.1Oxidation resistance protein
XLOC_013630	OMO98485.1 flowering-promoting factor 1-like protein 3-like protein
XLOC_013697	XP_024038960.1probable disease resistance protein At4g27220
XLOC_013836	PSR87459.1Pollen-specific protein-like
XLOC_013855	XP_018829244.1 NADH dehydrogenase [ubiquinone] 1 alpha subcomplex subunit 2-like
XLOC_013900	XP_022898703.1probable LRR receptor-like serine/threonine-protein kinase RFK1 isoform X3
XLOC_013904	KVH94018.1Glycosyl transferase, family 1
XLOC_013960	XP_018834978.1 metal tolerance protein 1-like isoform X1
XLOC_013983	XP_020534126.1dCTP pyrophosphatase 1 isoform X2
XLOC_014007	PON96845.1GPCR kinase
XLOC_014009	PSS34257.1Rust resistance kinase
XLOC_014047	XP_017232593.1 glyoxylate/hydroxypyruvate reductase HPR3-like
XLOC_014091	PSR91152.1Transcription factor BEE like
XLOC_014102	PSR95043.1Nodulation-signaling pathway 2 protein
XLOC_014162	PSR92976.1Protein DMR6-LIKE OXYGENASE 2 like
XLOC_014196	PSS24440.1F-box/WD-40 repeat-containing protein
XLOC_014217	---NA---
XLOC_014351	XP_021629857.1U-box domain-containing protein 26-like
XLOC_014371	PSS33095.1Heat stress transcription factor B-2a like
XLOC_014378	PSS24172.1Chromosome partition protein like
XLOC_014424	PIN01212.1Aldehyde reductase
XLOC_014440	---NA---
XLOC_014476	PSS29112.1RNA-directed RNA polymerase
XLOC_014512	PSR92480.1Serine carboxypeptidase-like
XLOC_014606	PON46081.1VQ motif containing protein
XLOC_014632	PSR92567.1Acyl-CoA dehydrogenase
XLOC_014721	---NA---
XLOC_014722	XP_018833429.1 cationic amino acid transporter 4, vacuolar-like
XLOC_014743	PIN07384.1Transcription factor HEX
XLOC_014812	PSR92976.1Protein DMR6-LIKE OXYGENASE 2 like
XLOC_014837	---NA---
XLOC_014891	RVX15249.1Thioredoxin H-type
XLOC_014915	---NA---
XLOC_014983	OVA17849.1Oxysterol-binding protein
XLOC_015034	AVZ45862.1L-ascorbate oxidase 3
XLOC_015050	PSS14314.1Mitogen-activated protein kinase
XLOC_015056	PSS34865.1Myosin-binding protein
XLOC_015193	---NA---
XLOC_015244	PSR87565.1Cysteine-rich receptor-like protein kinase
XLOC_015300	RVW24579.11-aminocyclopropane-1-carboxylate oxidase-like 1
XLOC_015304	XP_002514739.1thioredoxin-like 1-2, chloroplastic
XLOC_015351	XP_010250479.1 40S ribosomal protein S27-2
XLOC_015389	PIN18013.1putative mechanosensitive ion channel
XLOC_015390	XP_027065747.1transmembrane protein 128-like
XLOC_015393	---NA---
XLOC_015404	PSS01529.1Acetate/butyrate--CoA ligase AAE7, peroxisomal like
XLOC_015453	PSS05744.1Lipoyl synthase
XLOC_015466	PSS16174.1Protein DETOXIFICATION like
XLOC_015474	PSS04034.1Peroxisomal acyl-coenzyme A oxidase
XLOC_015529	PSS03173.1LOB domain-containing protein
XLOC_015603	PSR98639.1E3 ubiquitin-protein like
XLOC_015641	PSS33660.1AT-rich interactive domain-containing protein
XLOC_015668	PSS13478.1Chorismate mutase
XLOC_015709	PSS00348.1RNA-binding protein ARP1
XLOC_015808	---NA---
XLOC_015871	KZV29530.1uracil phosphoribosyltransferase family protein
XLOC_015975	PSR91738.1Cytochrome P450 711A1 like
XLOC_016030	PSS33245.1WRKY transcription factor 70
XLOC_016060	XP_007042459.2 putative nuclease HARBI1
XLOC_016238	XP_010048551.1 sodium transporter HKT1
XLOC_016316	XP_009624595.1 aquaporin TIP1-3
XLOC_016324	PSS21211.1Phytosulfokine-beta like
XLOC_016379	PSS02054.1Flavin-containing monooxygenase
XLOC_016411	PSR98171.1Serine/threonine-protein kinase
XLOC_016432	XP_020249354.1zinc finger MYM-type protein 1-like
XLOC_016450	PSS09396.1E3 ubiquitin-protein ligase RHB1A
XLOC_016459	XP_022874439.1heterogeneous nuclear ribonucleoprotein A3 homolog 2-like
XLOC_016466	---NA---
XLOC_016538	---NA---
XLOC_016572	AND76217.1glutathione transferase
XLOC_016573	AND76217.1glutathione transferase
XLOC_016574	---NA---
XLOC_016604	---NA---
XLOC_016633	XP_019074720.1 RING-H2 finger protein ATL78
XLOC_016636	PSR89967.1Classical arabinogalactan protein
XLOC_016651	---NA---
XLOC_016723	PKU74093.1putative mediator of RNA polymerase II transcription subunit 37c
XLOC_016961	AUD40392.1ABA 8'-hydroxylase
XLOC_017050	XP_002267870.2 probable LRR receptor-like serine/threonine-protein kinase At4g26540
XLOC_017139	PSS07484.1Caffeoylshikimate esterase
XLOC_017175	PSS11977.1G-type lectin S-receptor-like serine/threonine-protein kinase
XLOC_017239	ARU79084.1beta-glucosidase 6 GH3 family
XLOC_017263	RWR94899.1ataxia telangiectasia mutated family protein
XLOC_017280	XP_011070591.1protein PLANT CADMIUM RESISTANCE 2-like
XLOC_017281	RVW42870.1Retrovirus-related Pol polyprotein from transposon TNT 1-94
XLOC_017396	XP_012072181.1CSC1-like protein ERD4
XLOC_017402	PSR85975.1Protein EXORDIUM-like
XLOC_017438	PSS14229.1Lectin-receptor kinase
XLOC_017449	PWA78943.1pigment precursor permease, P-loop containing nucleoside triphosphate hydrolase
XLOC_017452	PSS35995.1Organellar oligopeptidase
XLOC_017532	PSR91766.1ATP-dependent 6-phosphofructokinase
XLOC_017584	EOY10677.1Vacuolar ATP synthase catalytic subunit-related / V-ATPase-related / vacuolar proton pump-related
XLOC_017670	---NA---
XLOC_017731	XP_019266768.1 probable LRR receptor-like serine/threonine-protein kinase At1g07650 isoform X1
XLOC_017736	PSS30129.1RING-H2 finger protein
XLOC_017763	XP_002284819.1 protein PLANT CADMIUM RESISTANCE 2
XLOC_017771	OIS96554.1hypothetical protein A4A49_08814
XLOC_017811	PNX93925.1RING finger protein
XLOC_017874	PSS04036.1Branchpoint-bridging protein
XLOC_017887	XP_019179430.1 E3 ubiquitin-protein ligase MIEL1
XLOC_017904	PSS23965.1Acyl-activating enzyme like
XLOC_017960	PSR91083.1Glycoprotein gp2 precursor
XLOC_018021	PSS32357.1Late embryogenesis abundant protein
XLOC_018023	GAV71885.1TPT domain-containing protein
XLOC_018029	---NA---
XLOC_018122	PSR91577.1Lipid transfer protein EARLI 1 like
XLOC_018124	ADM88555.1lactate dehydrogenase
XLOC_018136	XP_004308542.1 receptor-like protein 12
XLOC_018182	PSS11997.1Zinc finger A20 and AN1 domain-containing stress-associated protein
XLOC_018193	PSS17378.1Protein Ycf2 like
XLOC_018207	---NA---
XLOC_018212	XP_023904807.1elicitor-responsive protein 1
XLOC_018302	AFH36337.1aquaporin PIP2;2
XLOC_018410	PSS07561.1Homeobox protein cut-like
XLOC_018525	PON83766.1Aldo/keto reductase/potassium channel subunit beta
XLOC_018578	PSR93241.1Sodium-coupled neutral amino acid transporter like
XLOC_018633	XP_021597473.1beta-galactosidase-like isoform X4
XLOC_018695	PSR96466.1Nudix hydrolase
XLOC_018704	PSR92672.1Histidine-containing phosphotransfer protein
XLOC_018714	PSS24525.1TMV resistance protein like
XLOC_018723	XP_019151160.1 sorting nexin 2B-like
XLOC_018862	XP_017187653.1 serine/arginine-rich SC35-like splicing factor SCL33
XLOC_018877	---NA---
XLOC_018933	---NA---
XLOC_018979	---NA---
XLOC_019018	APA20280.1nitrate transporter 1:2
XLOC_019020	AML76450.1putative LOV domain-containing protein
XLOC_019053	PSS07283.1senescence-associated gene 21 like protein
XLOC_019112	XP_008374730.1 alpha-galactosidase 3-like
XLOC_019160	PSS26339.1Spermidine hydroxycinnamoyl transferase
XLOC_019199	---NA---
XLOC_019206	XP_011650607.1 cytochrome c oxidase subunit 6a, mitochondrial isoform X1
XLOC_019213	---NA---
XLOC_019214	---NA---
XLOC_019270	ASU87411.14-coumarate-CoA ligase
XLOC_019271	XP_022719993.1germin-like protein subfamily 1 member 13
XLOC_019299	---NA---
XLOC_019327	XP_023751532.160S ribosomal protein L12
XLOC_019380	KVH94764.1 Heat shock protein DnaJ, cysteine-rich domain-containing protein
XLOC_019420	PSS04384.1Scarecrow-like protein
XLOC_019494	PIN26469.1GDP-mannose pyrophosphorylase
XLOC_019530	XP_018507525.1 chloride intracellular channel protein 6-like
XLOC_019556	PSS31488.1U-box domain-containing protein
XLOC_019662	PSS11943.1Disease resistance RPP13-like protein
XLOC_019691	XP_023911593.1basic 7S globulin-like
XLOC_019735	PSS16442.1Prohibitin-1 like
XLOC_019736	PSS05673.1Large tegument protein like
XLOC_019795	PSS07839.1Titin like
XLOC_019804	PSR89764.1Transcription factor bHLH36 like
XLOC_019863	ABB89014.1CXE carboxylesterase
XLOC_019934	---NA---
XLOC_019971	XP_009803635.1 putative invertase inhibitor
XLOC_020027	XP_007032348.2 glycerol-3-phosphate 2-O-acyltransferase 6
XLOC_020130	PSS17210.1Protein indeterminate-domain like
XLOC_020154	PSS05685.1Frizzled and smoothened-like protein
XLOC_020162	XP_004235065.1linamarin synthase 1-like
XLOC_020172	PSR98020.1Transcription factor DIVARICATA like
XLOC_020205	XP_021664804.1metal tolerance protein C4-like isoform X2
XLOC_020252	PNY16248.1glycosyl transferase (glycosyl transferase family 2)
XLOC_020421	PSR95824.1Inactive protein RESTRICTED TEV MOVEMENT like
XLOC_020471	PHT27981.1Glycerophosphodiester phosphodiesterase protein kinase domain-containing GDPDL2
XLOC_020511	XP_021594722.1ATP sulfurylase 1, chloroplastic-like
XLOC_020587	---NA---
XLOC_020672	PSR89268.1Extra-large guanine nucleotide-binding protein like
XLOC_020702	XP_019160226.1 protein PLANT CADMIUM RESISTANCE 2-like
XLOC_020710	---NA---
XLOC_020712	XP_023886925.1receptor-like protein EIX2
XLOC_020742	XP_006385366.1protein ROOT HAIR DEFECTIVE 3 isoform X1
XLOC_020773	PSR95607.1Mediator of RNA polymerase II transcription subunit like
XLOC_020823	XP_010271236.1 dihydropyrimidine dehydrogenase (NADP(+)), chloroplastic
XLOC_020828	PSS16085.1Receptor-like protein
XLOC_020831	PSR97955.1Transcription factor bHLH104 like
XLOC_020844	PIN01441.1Serine/threonine protein kinase
XLOC_020885	AYA60147.1vacuolar amino acid transporter 2
XLOC_020908	EOY33534.1 Cytochrome-c oxidases,electron carriers
XLOC_020920	XP_027123274.1DEAD-box ATP-dependent RNA helicase 35-like
XLOC_020992	OMO97970.1Alpha/beta hydrolase-3
XLOC_021102	XP_021664828.1probable pectinesterase/pectinesterase inhibitor 17
XLOC_021107	XP_021802228.1receptor-like protein 12
XLOC_021232	XP_027122623.1mannosyl-oligosaccharide 1,2-alpha-mannosidase MNS1-like
XLOC_021254	XP_021674933.1receptor like protein 30-like
XLOC_021300	PSR84975.1Protein of unknown function DUF1262 protein
XLOC_021303	XP_021664828.1probable pectinesterase/pectinesterase inhibitor 17
XLOC_021334	GAV61922.1DUF2435 domain-containing protein/Vac14_Fig4_bd domain-containing protein/Vac14_Fab1_bd domain-containing protein
XLOC_021343	XP_022855824.1probable beta-D-xylosidase 2 isoform X2
XLOC_021346	---NA---
XLOC_021354	PSS34728.1Protein phosphatase 2C 73
XLOC_021369	XP_002281334.1 alcohol dehydrogenase 1 isoform X2
XLOC_021385	---NA---
XLOC_021418	XP_019078846.1PREDICTED: uncharacterized protein LOC100252779
XLOC_021445	PSR92961.1Beta-D-glucosyl crocetin beta-1,6-glucosyltransferase
XLOC_021458	XP_002272420.1 WUSCHEL-related homeobox 8
XLOC_021494	EXB88501.1hypothetical protein L484_017254
XLOC_021512	PSR92473.1Protein like
XLOC_021518	XP_002266038.1 probable E3 ubiquitin-protein ligase RHY1A
XLOC_021520	PSS02038.1Von Willebrand factor A domain-containing protein
XLOC_021549	XP_018836523.1 beta-hexosaminidase 1-like
XLOC_021562	XP_022746292.1leucine-rich repeat receptor-like protein kinase PXC2
XLOC_021570	XP_019170673.1 peptidyl-prolyl cis-trans isomerase CYP28, chloroplastic
XLOC_021608	XP_021987393.1F-box/LRR-repeat protein 12
XLOC_021617	PSS14156.1Transmembrane protein
XLOC_021629	PSR84827.1Anthranilate phosphoribosyltransferase
XLOC_021794	XP_002273091.2 O-glucosyltransferase rumi homolog
XLOC_021869	PSS16441.1Glutaredoxin-C9 like
XLOC_021915	XP_022727958.1heat stress transcription factor A-2d-like isoform X3
XLOC_021980	PKI77579.1hypothetical protein CRG98_002033
XLOC_022044	XP_015872784.1thioredoxin-like 1-2, chloroplastic
XLOC_022096	XP_021656182.1chaperone protein dnaJ 8, chloroplastic-like
XLOC_022114	ABF60002.1lipoxygenase 2
XLOC_022182	PSS16294.1Formimidoyltetrahydrofolate cyclodeaminase
XLOC_022188	PSR90053.1Pentatricopeptide repeat-containing protein
XLOC_022218	PSS32880.1Transcription factor like
XLOC_022248	PSR85039.1Hemoglobin subunit beta like
XLOC_022276	PSR96890.1U3 small nucleolar RNA-associated protein like
XLOC_022321	EOY28363.1Bromodomain 4, putative
XLOC_022391	---NA---
XLOC_022460	RVW82259.1Transcription factor JUNGBRUNNEN 1
XLOC_022475	PSS29248.1Pathogenesis-related protein PR-1 type like
XLOC_022515	PSR97903.1BZIP transcription factor
XLOC_022553	GAV64704.1DAGK_acc domain-containing protein/DAGK_cat domain-containing protein
XLOC_022636	PSR95023.1Serine/arginine-rich splicing factor like
XLOC_022905	PSR96704.1Telomere length regulator taz1 like
XLOC_022906	---NA---
XLOC_023011	RVX13717.1Peptidyl-prolyl cis-trans isomerase FKBP20-1
XLOC_023035	PSS26484.1Serine/threonine-protein kinase-like protein
XLOC_023084	PSS09438.1Transcription factor like
XLOC_023085	XP_022873093.11-aminocyclopropane-1-carboxylate oxidase homolog 1-like
XLOC_023109	---NA---
XLOC_023115	RWR88792.1procyclic form-specific polypeptide B1-alpha-like protein
XLOC_023150	XP_010258184.1 nodulin-related protein 1-like
XLOC_023179	PSR96380.1Cobyrinate a,c-diamide synthase
XLOC_023242	PHT26372.1WAT1-related protein
XLOC_023276	AFQ39766.1polygalacturonase-inhibiting protein
XLOC_023341	PSS34257.1Rust resistance kinase
XLOC_023398	XP_019240224.1 heavy metal-associated isoprenylated plant protein 39-like
XLOC_023433	PON60289.1Erythronate-4-phosphate dehydrogenase family protein
XLOC_023477	PSR89587.1Serine/threonine-protein kinase
XLOC_023494	PSS34256.1Rust resistance kinase
XLOC_023496	---NA---
XLOC_023498	PSR93446.1LRR receptor-like serine/threonine-protein kinase
XLOC_023523	PSS11178.1Heparanase-like protein
XLOC_023536	PSS15558.1E3 UFM1-protein like
XLOC_023555	---NA---
XLOC_023591	---NA---
XLOC_023601	PSS06314.1NAC domain-containing protein
XLOC_023668	XP_018824073.1 AAA-ATPase At2g18193-like
XLOC_023683	XP_021911175.1berberine bridge enzyme-like 4
XLOC_023812	EFH41860.1predicted protein
XLOC_023837	PSS01369.1CSC1-like protein
XLOC_023885	XP_016707238.1 calmodulin-like protein 5
XLOC_023894	---NA---
XLOC_023953	PSS13906.1UPF0481 protein
XLOC_024035	OTG15630.1putative zinc finger, CCHC-type
XLOC_024137	PSS36324.1ATP-sensitive inward rectifier potassium channel like
XLOC_024229	RXH72084.1hypothetical protein DVH24_025585
XLOC_024251	XP_016696047.1 gibberellin receptor GID1B-like isoform X1
XLOC_024264	PRQ17189.1putative RNA-directed DNA polymerase
XLOC_024284	XP_015575755.1alpha-galactosidase 3
XLOC_024304	PSS24526.1TMV resistance protein like
XLOC_024367	EOY18123.1Kinase superfamily protein isoform 2
XLOC_024396	PSS23965.1Acyl-activating enzyme like
XLOC_024449	PSS04316.1WAT1-related protein
XLOC_024451	PSS11166.1LRR receptor-like serine/threonine-protein kinase precursor
XLOC_024538	AIS71930.123 kDa jasmonate-induced protein
XLOC_024539	AIS71930.123 kDa jasmonate-induced protein
XLOC_024581	---NA---
XLOC_024686	XP_008458551.1 serine incorporator 3
XLOC_024687	XP_008458551.1 serine incorporator 3
XLOC_024772	RVW90360.1Transposon Tf2-12 polyprotein
XLOC_024782	XP_027110503.1uncharacterized protein LOC113730184
XLOC_024806	PHU20713.1hypothetical protein BC332_11864
XLOC_024828	PIN09806.1Endoplasmic reticulum protein EP58, contains filamin rod domain and KDEL motif
XLOC_024861	PSS11246.1Methionine gamma-lyase
XLOC_024886	EOY32677.1LRR and NB-ARC domains-containing disease resistance protein, putative
XLOC_024930	PSS20941.1Immunoglobulin A1 protease
XLOC_024954	---NA---
XLOC_024956	---NA---
XLOC_025048	PON72515.1Splicing factor, SPF
XLOC_025051	PSS02038.1Von Willebrand factor A domain-containing protein
XLOC_025123	RVX21259.1Transposon TX1 uncharacterized 149 kDa protein
XLOC_025129	AQL03708.1Retrovirus-related Pol polyprotein LINE-1
XLOC_025156	APD25541.1heat shock factor B3
XLOC_025159	---NA---
XLOC_025199	AML79211.1putative LOV domain-containing protein
XLOC_025223	RDX63664.1putative glutathione S-transferase
XLOC_025328	PSS13503.1ASC1-like protein
XLOC_025455	NP_001316528.1NADH-ubiquinone reductase complex 1 MLRQ subunit-like protein
XLOC_025495	XP_018834466.1 cold-regulated 413 inner membrane protein 1, chloroplastic-like isoform X2
XLOC_025573	PSR95472.1Lysophospholipase BODYGUARD 1 precursor
XLOC_025579	XP_021631564.1transcription factor bHLH155-like
XLOC_025702	XP_021282213.1polygalacturonase inhibitor-like
XLOC_025709	PSS04865.1LRR receptor-like serine/threonine-protein kinase
XLOC_025714	PSS19635.1GDSL esterase/lipase
XLOC_025716	EOY23980.1 PLATZ transcription factor family protein isoform 1
XLOC_025721	EOY23980.1 PLATZ transcription factor family protein isoform 1
XLOC_025755	PSS15922.1Serine/arginine-rich SC35-like splicing factor
XLOC_025773	XP_015887899.1electron transfer flavoprotein subunit beta, mitochondrial
XLOC_025802	XP_019237100.1 17.3 kDa class II heat shock protein-like
XLOC_025832	PSS32634.1Receptor protein kinase
XLOC_025852	XP_021293796.1cysteine-rich receptor-like protein kinase 25 isoform X5
XLOC_025928	KRY07909.1Retrovirus-related Pol polyprotein from type-1 retrotransposable element
XLOC_025945	XP_018828898.1 metallophosphoesterase 1-like isoform X1
XLOC_025969	KZV32174.1retrovirus-related Pol polyprotein from transposon TNT 1-94
XLOC_025972	---NA---
XLOC_025980	---NA---
XLOC_025987	XP_018827585.1 fumarylacetoacetase
XLOC_025991	PSR95189.1Protein disulfide isomerase-like
XLOC_026032	---NA---
XLOC_026140	PSS07423.1Acyl-coenzyme A thioesterase 13, N-terminally processed like
XLOC_026189	OMO99362.1hypothetical protein CCACVL1_03837
XLOC_026241	AHC32018.1galactokinase 1
XLOC_026283	PSR89744.1Multiple organellar RNA editing factor 2 like
XLOC_026348	AGO64661.1receptor-like protein
XLOC_026418	---NA---
XLOC_026436	PSS08393.1Cytochrome P450 CYP736A12 like
XLOC_026539	PSS33458.1Beta-glucosidase btgE precursor
XLOC_026634	PSS09946.1U-box domain-containing protein
XLOC_026656	XP_019234756.1 annexin D3-like
XLOC_026693	XP_010090653.1probable WRKY transcription factor 75
XLOC_026761	PSR87609.1Senescence-associated carboxylesterase
XLOC_026852	---NA---
XLOC_026867	XP_017975157.1 prostatic spermine-binding protein
XLOC_026871	XP_022775887.1cytochrome P450 CYP749A22-like
XLOC_026900	XP_018816685.1 protein GLUTAMINE DUMPER 4-like
XLOC_026910	XP_002280532.1 probable glutathione S-transferase
XLOC_026938	PSR87466.13-oxoacyl-[acyl-carrier-protein] reductase
XLOC_026986	RVX23377.1putative WRKY transcription factor 7
XLOC_027052	PSS11207.1Cellulose synthase-like protein
XLOC_027062	---NA---
XLOC_027111	---NA---
XLOC_027146	EOY14641.1Cytochrome P450 82A3, putative isoform 1
XLOC_027186	AML76450.1putative LOV domain-containing protein
XLOC_027242	XP_010045714.1 probable fructokinase-1
XLOC_027271	XP_009339924.1 endo-1,3;1,4-beta-D-glucanase-like isoform X1
XLOC_027318	XP_018498330.1 branched-chain-amino-acid aminotransferase-like protein 2
XLOC_027337	RVW14693.1NEP1-interacting protein-like 2
XLOC_027343	PSR93625.1Copper-transporting ATPase
XLOC_027397	---NA---
XLOC_027425	PON60289.1Erythronate-4-phosphate dehydrogenase family protein
XLOC_027445	---NA---
XLOC_027463	XP_018860129.1 flavin-dependent oxidoreductase FOX2-like
XLOC_027495	PSS04743.1Protein PLANT CADMIUM RESISTANCE like
XLOC_027572	PSR95043.1Nodulation-signaling pathway 2 protein
XLOC_027670	---NA---
XLOC_027913	---NA---
XLOC_028017	EOX91822.1Basic helix-loop-helix DNA-binding superfamily protein, putative
XLOC_028355	XP_011088856.1pleiotropic drug resistance protein 2
XLOC_028356	---NA---
XLOC_028357	---NA---
XLOC_028360	PSR90208.1Chromatin structure-remodeling complex protein like
XLOC_028414	PSS32711.140S ribosomal protein like
XLOC_028424	PSS17664.1Dehydration-responsive element-binding protein like
XLOC_028444	PSS16173.13-hydroxybutyryl-CoA dehydrogenase
XLOC_028486	NP_001295667.1oleosin 18.2 kDa-like
XLOC_028540	XP_024981866.1polygalacturonase inhibitor-like
XLOC_028546	XP_024981866.1polygalacturonase inhibitor-like
XLOC_028548	PSS36320.13,9-dihydroxypterocarpan 6A-monooxygenase
XLOC_028553	PSS36320.13,9-dihydroxypterocarpan 6A-monooxygenase
XLOC_028563	PSS29461.1Chromatin remodeling protein like
XLOC_028601	XP_024441919.1zinc finger MYM-type protein 1-like
XLOC_028639	PSS04018.1RING-H2 finger protein
XLOC_028645	XP_022774382.1probable carboxylesterase 120
XLOC_028651	XP_022774382.1probable carboxylesterase 120
XLOC_028694	PSR98019.1Cationic amino acid transporter 6 like
XLOC_028716	XP_021599985.1dof zinc finger protein DOF1.4-like
XLOC_028725	GAV61810.1PP2C domain-containing protein
XLOC_028878	XP_009804054.1 probable methyltransferase PMT15
XLOC_028902	PSS17973.1T-kininogen 2 light chain like
XLOC_028963	---NA---
XLOC_028980	RVW65596.1putative ribonuclease H protein
XLOC_028984	XP_010691604.1 protein DA1-related 2 isoform X1
XLOC_029058	XP_002266161.1 putative zinc transporter At3g08650
XLOC_029144	XP_021832291.1uncharacterized protein LOC110772187 isoform X2
XLOC_029177	PSR87837.1Extensin like
XLOC_029210	XP_009353902.1 acyl-coenzyme A thioesterase 13
XLOC_029332	XP_006364200.1 metallothiol transferase FosB
XLOC_029368	EOY26503.1LRR and NB-ARC domains-containing disease resistance protein isoform 1
XLOC_029437	PSS32301.1WD40 repeat, conserved site protein
XLOC_029450	---NA---
XLOC_029498	PSS11264.1StAR-related lipid transfer protein like
XLOC_029505	PSR94730.1Histone acetyltransferase
XLOC_029584	PSR87467.1WRKY transcription factor
XLOC_029592	XP_002274131.2 peroxidase 55
XLOC_029735	XP_018835529.1 endochitinase-like
XLOC_029740	PSS32860.1Serine carboxypeptidase-like
XLOC_029877	PSS36447.1Calcium uniporter protein
XLOC_030044	PSS11061.1GMP synthase
XLOC_030076	---NA---
XLOC_030247	PSS04865.1LRR receptor-like serine/threonine-protein kinase
XLOC_030290	OVA10650.1Protein kinase domain
XLOC_030312	PSR90026.1Protein SODIUM POTASSIUM ROOT DEFECTIVE 2 like
XLOC_030356	ABB82365.1class I beta-1,3-glucanase
XLOC_030412	PSR84720.1F-box/LRR-repeat/kelch-repeat protein
XLOC_030416	PSS17875.1Aspartate racemase
XLOC_030432	---NA---
XLOC_030497	XP_022719993.1germin-like protein subfamily 1 member 13
XLOC_030517	GAV80724.1Patatin domain-containing protein
XLOC_030622	PSR93163.1Dystrophin like
XLOC_030663	PSS34910.1Cytochrome P450 76A2 like
XLOC_030725	PSS32336.1Vacuolar protein sorting-associated protein like
XLOC_030779	PSS21052.1Heptahelical transmembrane protein
XLOC_030798	PSR95922.1Nuclear speckle splicing regulatory protein like
XLOC_030812	PSS32336.1Vacuolar protein sorting-associated protein like
XLOC_030841	PON83766.1Aldo/keto reductase/potassium channel subunit beta
XLOC_030894	PSS13865.1Umecyanin like
XLOC_030896	XP_009794603.1 blue copper protein-like
XLOC_030953	PSR95510.1DCN1-like protein
XLOC_030956	XP_010260741.1 ribosomal RNA large subunit methyltransferase I isoform X2
XLOC_030978	PSS34946.1S-crystallin like
XLOC_031058	EEF29798.1CBL-interacting serine/threonine-protein kinase, putative
XLOC_031064	---NA---
XLOC_031089	PSS03957.1Trehalose-phosphate phosphatase
XLOC_031099	---NA---
XLOC_031270	RWR83310.1hypothetical protein CKAN_01206300
XLOC_031271	PSS07350.1Protein ROOT HAIR DEFECTIVE like
XLOC_031312	XP_023920158.1uncharacterized protein LOC112031678
XLOC_031408	XP_010271744.1 3-oxo-Delta(4,5)-steroid 5-beta-reductase-like
XLOC_031418	PSS33333.1Nematode resistance protein like
XLOC_031425	PSS34434.1Arogenate dehydrogenase
XLOC_031464	PSS35169.1Hypersensitive-induced response protein
XLOC_031492	---NA---
XLOC_031604	PSS33092.1Methyl-CpG-binding domain-containing protein
XLOC_031699	PSS18032.1LRR receptor-like serine/threonine-protein kinase precursor
XLOC_031759	PRQ36507.1putative deacetoxyvindoline 4-hydroxylase
XLOC_031812	PSS16283.1A disintegrin and metalloproteinase with thrombospondin motifs 10 like
XLOC_031813	---NA---
XLOC_031816	PSS17166.1Acyl-activating enzyme 1, peroxisomal like
XLOC_031823	PSS24769.1Protein DMR6-LIKE OXYGENASE 2 like
XLOC_031869	PSS04128.1SPX domain-containing membrane protein
XLOC_031932	XP_021842763.1uncharacterized protein LOC110782822
XLOC_032007	XP_014507408.2DNA-directed RNA polymerases II, IV and V subunit 12
XLOC_032008	PSS26543.1Branched-chain-amino-acid aminotransferase-like protein
XLOC_032022	PSS29295.1Pathogenesis-related homeodomain protein
XLOC_032026	PSS00063.1WAT1-related protein
XLOC_032035	PSS07820.1Betaine aldehyde dehydrogenase
XLOC_032178	RVW13772.1Retrovirus-related Pol polyprotein from transposon TNT 1-94
XLOC_032235	PON84894.1Small GTP-binding domain containing protein
XLOC_032259	PSS05598.1Cytidylate kinase
XLOC_032306	XP_009594473.1 protein MKS1-like
XLOC_032344	XP_018817177.1 protein GAST1
XLOC_032366	---NA---
XLOC_032459	AZL19402.1NAC transcription factor
XLOC_032488	XP_002279452.1 malate synthase, glyoxysomal
XLOC_032508	PSS21415.1Phospholipase D delta like
XLOC_032552	PSS16331.1E3 ubiquitin-protein like
XLOC_032555	---NA---
XLOC_032567	PSR88018.1STS14 protein
XLOC_032605	PSR87853.1WD repeat-containing protein
XLOC_032729	PSS23837.1RING-H2 finger protein
XLOC_032765	---NA---
XLOC_032780	PSS01572.1Transcription factor bHLH35 like
XLOC_032837	PSR92707.1Leucine-rich repeat receptor-like serine/threonine-protein kinase
XLOC_032958	XP_018720774.1 hyoscyamine 6-dioxygenase isoform X2
XLOC_032966	PSR95429.1Protein Hook 3 like
XLOC_032973	---NA---
XLOC_032986	PSS30750.1Remorin like
XLOC_033050	PSS30307.1Acyltransferase-like protein
XLOC_033051	---NA---
XLOC_033178	PSR89656.1Activating signal cointegrator 1 like
XLOC_033194	XP_018835198.1 ABC transporter G family member 31
XLOC_033198	RVW56560.13-oxo-Delta(4,5)-steroid 5-beta-reductase
XLOC_033203	PSR99812.1Receptor protein kinase
XLOC_033241	PSR93139.1Wall-associated receptor kinase-like
XLOC_033245	PSR93139.1Wall-associated receptor kinase-like
XLOC_033364	---NA---
XLOC_033527	PSS06110.1Mitochondrial pyruvate carrier like
XLOC_033542	XP_017254559.1 peroxidase 44
XLOC_033548	RVW65672.1Receptor-like protein kinase HAIKU2
XLOC_033551	PON68295.1Sucrose/H+ symporter
XLOC_033568	PSS06347.1Protein LONGIFOLIA like
XLOC_033572	PSS24364.1Nuclear protein localization protein
XLOC_033621	XP_009348279.1 sigma factor binding protein 2, chloroplastic
XLOC_033667	PSR87948.1Cytochrome P450 81E8 like
XLOC_033769	PSR95251.1Uracil phosphoribosyltransferase
XLOC_033770	---NA---
XLOC_033784	PSS19158.1Dehydrodolichyl diphosphate synthase complex subunit like
XLOC_033786	PSS26057.1Polyol transporter like
XLOC_033959	XP_019239839.1 3-oxo-Delta(4,5)-steroid 5-beta-reductase-like
XLOC_033970	XP_006450317.1ethylene-responsive transcription factor ERF003
XLOC_034043	PSS34893.1Ethylene-responsive transcription factor
XLOC_034050	XP_021294119.1BOI-related E3 ubiquitin-protein ligase 1-like isoform X2
XLOC_034074	XP_010272036.1 LIM domain-containing protein WLIM1-like
XLOC_034293	PSS06365.1Methylcrotonoyl-CoA carboxylase subunit alpha like
XLOC_034336	PSS10294.1F-box protein
XLOC_034357	XP_021597983.1phospholipase A1-IIgamma-like
XLOC_034525	XP_007027035.1 actin
XLOC_034527	XP_016726852.1 U-box domain-containing protein 13-like
XLOC_034537	PSS15772.1Heavy metal-associated isoprenylated plant protein
XLOC_034699	XP_015877121.1protein TONNEAU 1a-like
XLOC_034744	PSS31578.1NADPH--cytochrome P450 reductase
XLOC_034752	---NA---
XLOC_034753	---NA---
XLOC_034773	XP_021658296.1serine/threonine-protein kinase CTR1-like isoform X1
XLOC_034879	XP_021613971.1transcription factor PRE6
XLOC_034950	RVW99059.1Glucan endo-1,3-beta-glucosidase, basic vacuolar isoform
XLOC_034952	RVW99059.1Glucan endo-1,3-beta-glucosidase, basic vacuolar isoform
XLOC_034982	XP_020229384.114-3-3-like protein D
XLOC_035099	EOY00937.1Encodes a protein whose expression is responsive to nematode infection, putative
XLOC_035108	XP_010263414.1 TMV resistance protein N-like
XLOC_035130	XP_006352751.1 histone H1-like
XLOC_035132	EOX96622.1Plasma-membrane choline transporter family protein isoform 1
XLOC_035210	---NA---
XLOC_035212	PSS06298.1G-type lectin S-receptor-like serine/threonine-protein kinase
XLOC_035252	PSS34917.1Proprotein convertase subtilisin/kexin type 4 like
XLOC_035276	---NA---
XLOC_035347	XP_023922890.1MDIS1-interacting receptor like kinase 2-like
XLOC_035352	XP_006339396.1 basic 7S globulin-like
XLOC_035390	PSS21673.1TMV resistance protein like
XLOC_035393	---NA---
XLOC_035645	PSS07245.1Mannosyl-oligosaccharide 1,2-alpha-mannosidase
XLOC_035657	PSS05780.1Fasciclin-like arabinogalactan protein
XLOC_035689	XP_016575740.1 delta(1)-pyrroline-2-carboxylate reductase
XLOC_035693	PSS33572.1Zeatin O-xylosyltransferase
XLOC_035697	PSS13906.1UPF0481 protein
XLOC_035701	XP_006492604.1protein DMR6-LIKE OXYGENASE 2-like
XLOC_035766	PSS11166.1LRR receptor-like serine/threonine-protein kinase precursor
XLOC_035819	PSR84975.1Protein of unknown function DUF1262 protein
XLOC_035856	XP_024631550.1thioredoxin-like 3-2, chloroplastic isoform X1
XLOC_035957	---NA---
XLOC_036014	---NA---
XLOC_036023	KVH88960.1Twin-arginine translocation protein TatA/B/E
XLOC_036027	PSS07957.1Heparanase-like protein
XLOC_036028	PSS07957.1Heparanase-like protein
XLOC_036066	XP_010260045.1 ABC transporter B family member 20
XLOC_036106	AYA60136.1putative polyamine transporter At3g13620
XLOC_036129	PSR86275.1LRR receptor-like serine/threonine-protein kinase
XLOC_036136	PSR91147.1Proline-rich receptor-like protein kinase
XLOC_036178	ABF60002.1lipoxygenase 2
XLOC_036277	PSS24526.1TMV resistance protein like
XLOC_036278	PSS30217.1Amino acid permease
XLOC_036280	XP_019414291.1 transmembrane protein 230-like
XLOC_036290	PSS33786.11-aminocyclopropane-1-carboxylate oxidase
XLOC_036330	XP_015060689.1ethylene-responsive transcription factor ERF114-like
XLOC_036371	PSR93176.1Transcription factor DIVARICATA like
XLOC_036386	PSS34282.1Late embryogenesis abundant protein
XLOC_036419	AYP70924.1beta-galactosidase 4
XLOC_036437	---NA---
XLOC_036452	XP_010245306.1 bifunctional epoxide hydrolase 2-like isoform X1
XLOC_036521	---NA---
XLOC_036604	XP_015867725.1ethylene-responsive transcription factor RAP2-4-like
XLOC_036606	XP_015867725.1ethylene-responsive transcription factor RAP2-4-like
XLOC_036610	AAI29241.1Zgc:158463 protein
XLOC_036613	---NA---
XLOC_036714	PSS01628.1RNA recognition motif domain protein
XLOC_036827	PSS07362.1Inorganic pyrophosphatase
XLOC_036896	PSS15703.1Triacylglycerol lipase
XLOC_036961	XP_011093669.1inositol oxygenase 2
XLOC_037070	PSS19270.1LisH domain-containing protein
XLOC_037120	AET25429.1class IV chitinase
XLOC_037139	PSS07742.1Zyxin like
XLOC_037255	XP_012492838.1 pathogenesis-related protein PR-4-like
XLOC_037264	PSS14504.1Constitutive photomorphogenesis protein
XLOC_037344	PSS15614.1Glucan endo-1,3-beta-glucosidase
XLOC_037418	PSS02799.1Protein DMR6-LIKE OXYGENASE 2 like
XLOC_037419	PSS02799.1Protein DMR6-LIKE OXYGENASE 2 like
XLOC_037465	XP_023870594.1oxysterol-binding protein-related protein 3A-like
XLOC_037639	AFD64619.1putative hydroxycinnamoyl-CoA:shikimate/quinate hydroxycinnamoyltransferase
XLOC_037688	AGO64661.1receptor-like protein
XLOC_037734	PSS00228.1Serine/threonine-protein kinase
XLOC_037747	---NA---
XLOC_037807	PSS20941.1Immunoglobulin A1 protease
XLOC_037817	ABB89014.1CXE carboxylesterase
XLOC_037886	PSR93134.1Protein phosphatase
XLOC_037900	PSS32933.1Heavy metal-associated isoprenylated plant protein
XLOC_037912	PSR95178.1Voltage-dependent T-type calcium channel subunit alpha-1I (Ca(v)3.3) like
XLOC_037934	PSS15821.1Annexin like
XLOC_037945	XP_002282535.1 beta-hexosaminidase 1
XLOC_037946	---NA---
XLOC_037957	PSR95216.14-coumarate--CoA ligase-like
XLOC_037958	XP_006833223.1heavy metal-associated isoprenylated plant protein 3 isoform X1
XLOC_037968	PSS28924.1Berberine bridge enzyme-like
XLOC_037987	XP_006370495.2G-type lectin S-receptor-like serine/threonine-protein kinase B120
XLOC_038010	PSS14006.1Protein DOWNY MILDEW RESISTANCE like
XLOC_038019	ABF60002.1lipoxygenase 2
XLOC_038073	PSS19475.1alcohol dehydrogenase
XLOC_038080	AYA60147.1vacuolar amino acid transporter 2
XLOC_038190	PSR89214.1Aspartyl protease
XLOC_038216	PSS17577.1WRKY transcription factor
XLOC_038275	1TP9_AChain A, Prx D (Type Ii) From Populus Tremula
XLOC_038373	PSR98903.1E3 ubiquitin-protein ligase RHG1A
XLOC_038395	PON77798.1DnaJ domain containing protein
XLOC_038452	AWH62807.1resveratrol O-methyltransferase-like protein
XLOC_038477	PON33146.1MORN motif
XLOC_038503	PSR95868.1CASP-like protein
XLOC_038553	XP_027063354.1VQ motif-containing protein 4-like
XLOC_038604	PSS11439.1F-box protein like
XLOC_038627	PSR87521.1Glycosyltransferase family 92 protein like
XLOC_038874	XP_016668922.1 pathogenesis-related protein PR-4-like
XLOC_038880	XP_008370705.1 pathogenesis-related protein PR-4
XLOC_038925	XP_002271860.1 probable LRR receptor-like serine/threonine-protein kinase At1g63430
XLOC_038940	PSS24810.1Plastid-lipid-associated protein
XLOC_038941	XP_023759460.1protein ACCELERATED CELL DEATH 6-like
XLOC_039030	AKI88009.1ammonium transporter 3.1-like protein
XLOC_039050	XP_018812036.1 cysteine-rich receptor-like protein kinase 15 isoform X1
XLOC_039071	PSS08277.1Alpha,alpha-trehalose-phosphate synthase
XLOC_039122	RVW16399.1Retrovirus-related Pol polyprotein from transposon RE1
XLOC_039178	AHL29280.1trehalose-phosphate synthase 6
XLOC_039192	XP_002264349.1 protein SCARECROW
XLOC_039241	PSS23908.1Protein NRT1/ PTR FAMILY 5.2 like
XLOC_039294	PSS33139.1Fructokinase-7 like
XLOC_039380	PSS31517.1Branched-chain-amino-acid aminotransferase
XLOC_039437	PSS18026.1ATP-dependent 6-phosphofructokinase
XLOC_039615	XP_023889825.1monothiol glutaredoxin-S10
XLOC_039664	XP_016460058.1 uncharacterized hydrolase YugF-like
XLOC_039699	PSR97918.1RAS guanyl-releasing protein like
XLOC_039715	PSS10131.1Linoleate 9S-lipoxygenase
XLOC_039742	---NA---
XLOC_039764	PSS16385.1Serine/threonine-protein kinase
XLOC_039794	PSS04020.1Ankyrin repeat-containing protein
XLOC_039853	XP_007013487.2 early nodulin-like protein 2
XLOC_039862	PSS34585.1Serine/threonine-protein kinase
XLOC_039907	PSR99926.1U-box domain-containing protein
XLOC_039957	PSS25982.1Proline-rich receptor-like protein kinase
XLOC_039958	XP_011046691.1 ubiquitin-conjugating enzyme E2 10-like
XLOC_039971	PSS00336.1Nuclear pore complex protein like
XLOC_040024	---NA---
XLOC_040230	PSS16319.1IST1-like protein
XLOC_040455	PSS28752.1NAC transcription factor
XLOC_040512	PSS21645.1Pectin acetylesterase
XLOC_040573	PSS30313.1Serine/threonine-protein kinase
XLOC_040620	ASU91608.1sulfate transporter 4.2
XLOC_040742	XP_027127282.1ribonuclease 3-like protein 2 isoform X1
XLOC_040846	XP_021683733.1heat shock cognate 70 kDa protein 2-like
XLOC_040848	PRQ43300.1 putative SAWADEE domain-containing protein
XLOC_040891	PSS08141.1Protein ABHD17C like
XLOC_040946	PSR90214.1Serine/threonine-protein kinase
XLOC_040973	PSR88155.1Kirola like
XLOC_040974	XP_027153789.1 kirola-like
XLOC_040981	AAB69727.13-hydroxy-3-methylglutaryl coenzyme A reductase
XLOC_041029	EOY21041.1Plant synaptotagmin isoform 2
XLOC_041070	XP_013633804.1 PHD finger-like domain-containing protein 5B
XLOC_041101	XP_022753497.1uncharacterized protein LOC111301794 isoform X1
XLOC_041133	---NA---
XLOC_041152	PSS02590.1Gamma-glutamyl peptidase
XLOC_041169	XP_009593784.1 phospholipase A1-IIdelta
XLOC_041170	PSS05643.1Plant cysteine oxidase
XLOC_041196	XP_011016976.1 serine hydroxymethyltransferase 2, mitochondrial
XLOC_041258	---NA---
XLOC_041285	ALO19890.1UDP-glycosyltransferase 84A22
XLOC_041399	XP_012460230.1 FK506-binding protein 5
XLOC_041407	---NA---
XLOC_041424	XP_027168203.1transmembrane 9 superfamily member 7
XLOC_041436	PSS19850.1Expansin-A1 like
XLOC_041452	PSS29303.1Methylthioribose kinase
XLOC_041580	PSS00042.17-deoxyloganetin glucosyltransferase
XLOC_041589	PSS23859.1Protein sel-1 1 like
XLOC_041792	PSS32446.1WW domain-binding protein like
XLOC_041812	ARU79079.1beta-glucosidase 1 GH3 family
XLOC_041864	PSS00149.17-deoxyloganetin glucosyltransferase
XLOC_041873	PSR91218.1Nudix hydrolase
XLOC_041877	BAJ95294.1predicted protein
XLOC_041878	AIS71930.123 kDa jasmonate-induced protein
XLOC_041911	PSR94988.1Peroxisomal membrane protein
XLOC_041913	PSS09583.1Myb-like protein
XLOC_041933	PSR89450.1Squamosa promoter-binding-like protein
XLOC_041942	---NA---
XLOC_042066	PSS15830.1Angiomotin like
XLOC_042082	---NA---
XLOC_042085	PSR84896.1Non-functional NADPH-dependent codeinone reductase
XLOC_042087	PSR84896.1Non-functional NADPH-dependent codeinone reductase
XLOC_042132	XP_002270750.3 probable WRKY transcription factor 65
XLOC_042165	XP_016651800.1 protein NRT1/ PTR FAMILY 5.5 isoform X2
XLOC_042195	XP_019171526.1 cysteine-rich receptor-like protein kinase 10
XLOC_042207	PSS07350.1Protein ROOT HAIR DEFECTIVE like
XLOC_042289	---NA---
XLOC_042390	PSR96158.1Inactive protein kinase
XLOC_042395	PSS07358.1PRA1 family protein
XLOC_042414	XP_027078042.1AAA-ATPase ASD, mitochondrial-like
XLOC_042426	---NA---
XLOC_042589	---NA---
XLOC_042595	PRQ29559.1putative nucleotidyltransferase, Ribonuclease H
XLOC_042597	PSS11240.1hypothetical protein CEY00_Acc15528
XLOC_042634	---NA---
XLOC_042640	XP_016683948.1 disease resistance protein At4g27190-like
XLOC_042759	PSS01866.1Sulfate transporter 3.5 like
XLOC_042760	PSS05894.1Glutathione S-transferase
XLOC_042832	XP_006477962.2receptor-like protein 7
XLOC_042852	---NA---
XLOC_042867	PSS04769.1Polyphenol oxidase
XLOC_042879	ABB89014.1CXE carboxylesterase
XLOC_042881	ABB89014.1CXE carboxylesterase
XLOC_043062	PSS21326.1MACPF domain-containing protein
XLOC_043074	PSS33669.1Protein ENHANCED DISEASE RESISTANCE like
XLOC_043311	PSS16037.1Gibberellin 2-beta-dioxygenase
XLOC_043335	XP_012479115.1PREDICTED: uncharacterized protein LOC105794477
XLOC_043339	XP_007021088.2 thioredoxin-like protein CXXS1
XLOC_043459	PSS09842.1Serine/threonine-protein kinase
XLOC_043476	---NA---
XLOC_043478	XP_015866052.2plasma membrane ATPase 4
XLOC_043480	---NA---
XLOC_043482	PSR88287.1UV excision repair protein
XLOC_043499	PSR88030.1G-box-binding factor like
XLOC_043502	---NA---
XLOC_043556	PSS31579.1Aspartate carbamoyltransferase
XLOC_043602	PSS11105.1Ankyrin repeat-containing protein
XLOC_043617	PSR88125.1Nudix hydrolase
XLOC_043663	---NA---
XLOC_043719	PRQ55603.1putative reverse transcriptase zinc-binding domain-containing protein
XLOC_043759	PSS28927.1E3 ubiquitin-protein like
XLOC_043959	XP_024033090.1probable phytol kinase 3, chloroplastic
XLOC_043962	PSR86190.1Zinc transporter 6 like
XLOC_044000	PSS35202.1Coiled-coil domain-containing protein
XLOC_044003	PSS19625.1Protein BONZAI like
XLOC_044014	XP_018812887.1 ABC transporter C family member 3
XLOC_044033	PSS31390.1Nucleobase-ascorbate transporter like
XLOC_044041	XP_024181852.1homeobox-leucine zipper protein ATHB-6-like isoform X2
XLOC_044117	PSS24918.1Disease resistance protein
XLOC_044243	PSS04203.1Serine/arginine repetitive matrix protein like
XLOC_044324	XP_011089652.1cytochrome P450 82C2
XLOC_044365	PSS09850.1Rop guanine nucleotide exchange factor like
XLOC_044367	PSS32642.1Fibropellin-1 like
XLOC_044368	---NA---
XLOC_044468	PSR89619.1Serine/threonine-protein kinase
XLOC_044559	PSS19790.1Carboxylesterase 18
XLOC_044629	XP_010259348.1 putative beta-D-xylosidase
XLOC_044722	XP_009622777.1 glyoxysomal fatty acid beta-oxidation multifunctional protein MFP-a
XLOC_044791	PSR89177.1Protein TolB like
XLOC_044887	---NA---
XLOC_044891	PSR98709.1Homoserine O-succinyltransferase
XLOC_044919	XP_027332117.1HMG-Y-related protein A-like
XLOC_044933	XP_010675101.1 protein ROOT HAIR DEFECTIVE 3-like
XLOC_044949	PSR95793.1NEP1-interacting protein-like
XLOC_044958	PKU61034.1putative mitochondrial protein
XLOC_044978	XP_016753568.1 germin-like protein subfamily 1 member 14
XLOC_045052	PSS30555.1Proline dehydrogenase
XLOC_045100	PSS24058.1Protein tweety-2 like
XLOC_045159	POO01947.1Basic helix-loop-helix transcription factor
XLOC_045173	PSR91728.1ABC transporter G family member 14 like
XLOC_045176	XP_011076196.1ADP-ribosylation factor-related protein 1
XLOC_045200	---NA---
XLOC_045201	PSS01746.1Protein STRICTOSIDINE SYNTHASE-LIKE 2 like
XLOC_045232	XP_011026640.1 probable prefoldin subunit 2 isoform X1
XLOC_045244	---NA---
XLOC_045262	ASU91606.1sulfate transporter 1.3
XLOC_045314	PSR87466.13-oxoacyl-[acyl-carrier-protein] reductase
XLOC_045337	PSR90216.1DNA-damage-repair/toleration protein
XLOC_045348	XP_002285015.1 transcription factor MYB44
XLOC_045413	PSS17964.1Chaperone protein dnaJ 11 like
XLOC_045428	PSR87756.1Protein ABHD17C like
XLOC_045451	XP_010047050.1 gamma-glutamyl peptidase 5
XLOC_045458	PSS32352.1Spastin like
XLOC_045471	PSR87657.1F-box/WD repeat-containing protein
XLOC_045505	PSS16102.1Vinorine synthase
XLOC_045519	PSS11109.160S ribosomal protein like
XLOC_045532	PSS36497.1Zinc finger protein
XLOC_045556	PSS01293.1Urea-proton symporter like
XLOC_045574	XP_011092087.1translationally-controlled tumor protein homolog
XLOC_045587	XP_023876074.1probable histone-arginine methyltransferase 1.3
XLOC_045740	---NA---
XLOC_045748	XP_002271552.1 ABC transporter G family member 28
XLOC_045786	XP_018834416.1 thylakoid lumenal 19 kDa protein, chloroplastic
XLOC_045874	PSS26186.1Magnesium-dependent phosphatase
XLOC_045951	PRQ35133.1putative Hemopexin-like domain-containing protein
XLOC_046027	PSS32867.1Protein fluG like
XLOC_046102	PSR95791.1Two-component response regulator-like
XLOC_046109	PSS06389.1Phenazine biosynthesis PhzF protein
XLOC_046385	PSS04789.1VQ motif-containing protein
XLOC_046387	PSS04789.1VQ motif-containing protein
XLOC_046403	XP_003631623.2 mitochondrial import receptor subunit TOM6 homolog
XLOC_046435	PSS23777.1Tropinone reductase
XLOC_046459	AGE10595.14-coumarate CoA ligase
XLOC_046514	XP_004228438.1GSH-induced LITAF domain protein
XLOC_046540	PSS30632.1Nodulation receptor kinase
XLOC_046584	PSS18042.12,3-bisphosphoglycerate-dependent phosphoglycerate mutase
XLOC_046690	XP_023926994.1protein SHOOT GRAVITROPISM 5-like isoform X2
XLOC_046705	PSS33767.1Inorganic phosphate transporter 1-4 like
XLOC_046724	PSR84489.1Dynein light chain like
XLOC_046750	AAL50317.1ultraviolet-B-inducible ribosomal protein
XLOC_046777	---NA---
XLOC_046960	PSR85159.1Inactive beta-amylase
XLOC_046965	XP_010029589.1 NAP1-related protein 1
XLOC_047058	XP_011089652.1cytochrome P450 82C2
XLOC_047087	PSS10077.1Porin QuiX like
XLOC_047143	PSS17319.1Amino acid permease
XLOC_047210	PSR84711.1Leaf rust 10 disease-resistance locus receptor-like protein kinase
XLOC_047242	XP_009592620.1 importin subunit alpha-4
XLOC_047247	XP_002275775.1 zinc finger CCCH domain-containing protein 3
XLOC_047261	AEQ27755.1receptor-like protein
XLOC_047284	XP_011095827.1flavonoid 3'-monooxygenase-like
XLOC_047293	---NA---
XLOC_047305	EEF50011.1 pyroglutamyl-peptidase I, putative
XLOC_047363	EEF50806.1 glutaredoxin, grx, putative
XLOC_047389	XP_023886933.1protein LURP-one-related 11-like
XLOC_047471	PSR90153.1Serine--glyoxylate aminotransferase
XLOC_047480	---NA---
XLOC_047508	PSR93313.1Hexose carrier protein
XLOC_047536	XP_009355374.1 cytochrome P450 714C2-like
XLOC_047569	PSR89904.1Aspartic proteinase-like protein
XLOC_047629	XP_023884223.1probable nucleoredoxin 1
XLOC_047712	XP_022844378.1E3 ubiquitin-protein ligase ATL59-like
XLOC_047719	PSS03011.1Heavy metal-associated isoprenylated plant protein
XLOC_047728	PSS07398.1Transcription factor MYB1R1 like
XLOC_047738	PSR96890.1U3 small nucleolar RNA-associated protein like
XLOC_047744	---NA---
XLOC_047826	PSS28973.1Inositol transporter like
XLOC_047940	AGO64661.1receptor-like protein
XLOC_047960	PSS32488.1Expansin-A8 like
XLOC_047970	---NA---
XLOC_047981	PSS08252.1Auxin-responsive protein
XLOC_047982	PSS08252.1Auxin-responsive protein
XLOC_048002	PSS21673.1TMV resistance protein like
XLOC_048196	---NA---
XLOC_048213	PSR95621.1DNA replication regulator sld2 like
XLOC_048228	PSS13868.12-succinylbenzoate--CoA ligase

## Sheet: GROUP C
1316 elements ARS 7 specific rooting C
XLOC_000049	PSR89866.1Nuclear transcription factor Y subunit alpha like
XLOC_000060	XP_022861703.1thioredoxin-like protein AAED1, chloroplastic isoform X1
XLOC_000138	PSS17537.1Auxin response factor like
XLOC_000165	XP_007012669.2 growth-regulating factor 1 isoform X3
XLOC_000175	PSS08111.1Reticulon-like protein
XLOC_000230	XP_024438520.1zinc finger MYM-type protein 1
XLOC_000247	PSS05938.1DNA polymerase delta subunit like
XLOC_000256	---NA---
XLOC_000278	PSR95074.1Proliferating cell nuclear antigen
XLOC_000318	XP_011070272.1protein TORNADO 2
XLOC_000419	XP_021601648.1transcription factor MYB44-like
XLOC_000433	---NA---
XLOC_000434	XP_011082814.1peptide methionine sulfoxide reductase B1, chloroplastic
XLOC_000457	---NA---
XLOC_000476	XP_002268298.1 pirin-like protein
XLOC_000497	PSS04293.17,8-diamino-pelargonic acid aminotransferase
XLOC_000499	OMO81784.1Saccharopine dehydrogenase / Homospermidine synthase
XLOC_000525	---NA---
XLOC_000568	XP_024926210.1myosin-11 isoform X2
XLOC_000573	PSS06435.1Protein NETWORKED 3A like
XLOC_000607	XP_009628313.1 myosin-9-like isoform X1
XLOC_000611	PSS31466.1G2/mitotic-specific cyclin C13-1 like
XLOC_000670	PSS02830.17-deoxyloganetin glucosyltransferase
XLOC_000690	XP_009802575.1 peroxidase 46-like
XLOC_000693	PSS20968.1Protein TIC 55 like
XLOC_000730	PSS34770.1Phospholipid-transporting ATPase
XLOC_000782	XP_017978197.1 transcription factor MYB26
XLOC_000828	XP_027160568.1S-adenosylmethionine synthase 3
XLOC_000829	XP_019417328.1 S-adenosylmethionine synthase 2
XLOC_000854	XP_017973506.1 NAP1-related protein 1
XLOC_000923	PSR98355.1Leucine-rich repeat receptor-like protein kinase
XLOC_000976	XP_012845326.1 glyoxylate/succinic semialdehyde reductase 1 isoform X1
XLOC_000989	XP_012075068.1RNA polymerase II subunit A C-terminal domain phosphatase SSU72 isoform X1
XLOC_001033	XP_018809738.1 protein LATERAL ORGAN BOUNDARIES-like
XLOC_001056	XP_022891265.1protein NRT1/ PTR FAMILY 6.1
XLOC_001074	RVW36762.1Retrovirus-related Pol polyprotein from transposon RE1
XLOC_001093	XP_021815283.1non-specific lipid-transfer protein 1-like
XLOC_001143	XP_024047269.1transmembrane protein 56-B isoform X2
XLOC_001144	XP_006468443.1transmembrane protein 56-B isoform X2
XLOC_001200	---NA---
XLOC_001237	PSR91333.1Anthranilate N-benzoyltransferase protein
XLOC_001241	PSS21517.1Sulfate transporter 2.1 like
XLOC_001254	PSR99854.1RNA-binding protein
XLOC_001294	PSS16047.1Glutathione S-transferase
XLOC_001306	PSS35084.1AUGMIN subunit like
XLOC_001334	AWI98008.1lipoxygenase 4
XLOC_001438	PSR84616.1Pentatricopeptide repeat-containing protein precursor
XLOC_001463	PSS05943.1CTP synthase
XLOC_001464	ADW77255.1CLE01 protein
XLOC_001475	PSS13682.1Non-specific lipid transfer protein GPI-anchored 1 like
XLOC_001480	PSS13684.1Squamosa promoter-binding-like protein
XLOC_001507	XP_010652818.1 cyclin-dependent kinase inhibitor 7 isoform X1
XLOC_001509	XP_002277488.3PREDICTED: uncharacterized protein LOC100259450
XLOC_001534	PSS02842.1WAT1-related protein
XLOC_001571	PSS07375.1Choline monooxygenase
XLOC_001605	XP_011101106.1putative kinase-like protein TMKL1
XLOC_001651	PSS12133.1Receptor-like serine/threonine-protein kinase
XLOC_001668	PSS05920.1Peptide methionine sulfoxide reductase
XLOC_001672	XP_018726477.1 lupeol synthase-like isoform X1
XLOC_001687	PSR97913.1Protein LONGIFOLIA like
XLOC_001695	PSS07800.1U-box domain-containing protein
XLOC_001941	PSS21292.1UBA-like domain-containing protein
XLOC_002006	PSS17656.1Gamma-interferon-inducible lysosomal thiol reductase
XLOC_002010	PSS23843.1Gamma-interferon-inducible lysosomal thiol reductase
XLOC_002018	XP_021754275.1reticulon-like protein B2 isoform X2
XLOC_002026	XP_008240231.1 non-specific lipid-transfer protein 2-like
XLOC_002027	PSS08386.1Reticulon-like protein
XLOC_002062	---NA---
XLOC_002112	---NA---
XLOC_002244	PSS14376.1Protein FAM84B like
XLOC_002395	PSS15533.1Histone acetyltransferase type B catalytic subunit like
XLOC_002443	XP_006443687.1protein LOW PSII ACCUMULATION 1, chloroplastic
XLOC_002478	PSS02699.1Filament-like plant protein
XLOC_002523	---NA---
XLOC_002572	XP_019188928.1 probable plastid-lipid-associated protein 11 isoform X1
XLOC_002591	PSS30362.1Denticleless protein
XLOC_002728	PSS33704.1Protein IQ-DOMAIN like
XLOC_002750	RHN42090.1putative RNA-directed DNA polymerase
XLOC_002788	PSS31158.1AT-hook motif nuclear-localized protein
XLOC_002790	PSS17180.1Protein PLASTID MOVEMENT IMPAIRED like
XLOC_002871	PSS26683.1Ribonucleoside-diphosphate reductase large subunit like
XLOC_002930	---NA---
XLOC_002969	PRQ20031.1putative RNA-directed DNA polymerase
XLOC_002971	PSS21664.1PCTP-like protein
XLOC_002994	---NA---
XLOC_003027	XP_027078712.1zinc finger CCCH domain-containing protein 15-like
XLOC_003089	PSS00335.1Heavy metal-associated isoprenylated plant protein
XLOC_003120	XP_021603532.1geranylgeranyl pyrophosphate synthase 7, chloroplastic-like
XLOC_003143	XP_018848085.1 protein YABBY 4-like isoform X1
XLOC_003252	PSR86202.1ATP-dependent DNA helicase
XLOC_003256	PSS04175.1Eukaryotic translation initiation factor 4 gamma 1 like
XLOC_003281	PSS03053.1Kinesin-like protein
XLOC_003315	OVA17387.1Acyl carrier protein (ACP)
XLOC_003373	XP_026406813.1heavy metal-associated isoprenylated plant protein 7-like
XLOC_003507	PSS16316.1Ethylene-responsive transcription factor
XLOC_003553	XP_012457514.1 peroxidase 29
XLOC_003585	---NA---
XLOC_003602	XP_004250155.1receptor-like cytosolic serine/threonine-protein kinase RBK1 isoform X1
XLOC_003628	PSS01629.1Nuclear transcription factor Y subunit A-10 like
XLOC_003702	PSS04697.1Lactoylglutathione lyase
XLOC_003741	PSS13459.1ABC transporter G family member 7 like
XLOC_003775	XP_009606848.1 pentatricopeptide repeat-containing protein At5g42310, mitochondrial
XLOC_003812	PSR98256.1Paraspeckle component like
XLOC_003840	PSS36718.1Retrotransposon-like protein
XLOC_003888	PSS24930.1Mannosylglycoprotein like
XLOC_003909	XP_012090413.1protein LOW PSII ACCUMULATION 2, chloroplastic
XLOC_003928	PSS01161.1Protein TIFY like
XLOC_003929	PSS01162.1Pentatricopeptide repeat-containing protein
XLOC_004047	XP_002277673.1 homeobox-leucine zipper protein ROC3
XLOC_004075	PSR91169.13-ketoacyl-CoA synthase
XLOC_004141	RVW42450.1Transposon TX1 uncharacterized 149 kDa protein
XLOC_004227	PSS32961.1Small heat shock protein
XLOC_004317	XP_019232726.1 expansin-A13-like
XLOC_004489	XP_011042467.1 MLO-like protein 11
XLOC_004561	XP_027066449.1bZIP transcription factor TGA10-like isoform X2
XLOC_004568	PSS04815.1ABC transporter like
XLOC_004591	XP_009592776.1 heat shock cognate 70 kDa protein 1-like
XLOC_004599	PON85601.1Transmembrane protein
XLOC_004646	XP_009342812.1 nuclear transcription factor Y subunit B-1-like
XLOC_004676	XP_027367432.1membrane protein PM19L
XLOC_004689	XP_011099677.1ultraviolet-B receptor UVR8 isoform X1
XLOC_004761	XP_018848866.1 zinc finger protein 8-like
XLOC_004789	PSS06233.1Ubiquitin carboxyl-terminal hydrolase
XLOC_004879	---NA---
XLOC_004933	AJO70167.1alpha,alpha-trehalose-phosphate synthase 5
XLOC_004963	PSS07667.1Molybdenum cofactor sulfurase
XLOC_004967	XP_021690200.1glucuronoxylan 4-O-methyltransferase 1-like
XLOC_005031	PSS13941.1LRR receptor-like serine/threonine-protein kinase
XLOC_005080	PSS24207.1Hydroquinone glucosyltransferase
XLOC_005083	PSS26289.1Hydroquinone glucosyltransferase
XLOC_005089	PSR91007.1Histidine kinase
XLOC_005211	XP_016483786.1 acylphosphatase-like isoform X1
XLOC_005247	PSR96852.1MAR-binding filament-like protein
XLOC_005250	XP_027160895.1hydroquinone glucosyltransferase-like
XLOC_005281	PSS36189.1LRR receptor-like serine/threonine-protein kinase
XLOC_005293	PSS29952.1Serine acetyltransferase
XLOC_005305	PSS24294.1UPF0187 protein
XLOC_005364	PSS15663.1Nuclear transcription factor Y subunit A-9 like
XLOC_005367	PSS01811.1Guanylate kinase
XLOC_005385	PSS06254.1Methyl-CpG-binding domain-containing protein
XLOC_005397	XP_027076094.1formin-like protein 6
XLOC_005458	XP_016506449.1 NAC domain-containing protein 43-like
XLOC_005544	RVW52855.1RING-H2 finger protein ATL46
XLOC_005606	PSS13583.1Deoxynucleoside triphosphate triphosphohydrolase
XLOC_005631	AIS71930.123 kDa jasmonate-induced protein
XLOC_005648	BBD19995.1NPF family transporter
XLOC_005780	PSS33549.1Sugar phosphate/phosphate translocator like
XLOC_005831	PSS32979.1Histone-lysine N-methyltransferase
XLOC_005881	PSR91786.1Protein NRT1/ PTR FAMILY 1.2 like
XLOC_005884	---NA---
XLOC_005927	GAV87838.1RVT_2 domain-containing protein
XLOC_006010	PSR89309.1Zinc transporter 4 like
XLOC_006033	PSS17611.1Histidine kinase
XLOC_006039	PSS33273.1Kelch-like protein
XLOC_006082	EOX92127.1 Hematological and neurological expressed 1-like protein
XLOC_006111	PSS34426.11-phosphatidylinositol 3-phosphate 5-kinase
XLOC_006146	PSS04685.1Chaperonin-like RBCX protein
XLOC_006174	PSS13943.1Purine permease
XLOC_006182	PSS32737.1WEB family protein
XLOC_006187	PSS16061.1Subtilisin-like protease
XLOC_006227	---NA---
XLOC_006231	PSS05920.1Peptide methionine sulfoxide reductase
XLOC_006258	PSS11659.1Protein LHY like
XLOC_006264	XP_002284720.1 HMG-Y-related protein A
XLOC_006295	AYA60137.1putative polyamine transporter At1g31830
XLOC_006353	XP_015882018.1dehydration-responsive element-binding protein 2G
XLOC_006388	PON94527.1Son of sevenless protein
XLOC_006410	PSS11792.1Cysteine-rich venom protein like
XLOC_006594	XP_023925115.1leucoanthocyanidin reductase-like
XLOC_006609	PSR95363.1G-type lectin S-receptor-like serine/threonine-protein kinase
XLOC_006613	PSR95363.1G-type lectin S-receptor-like serine/threonine-protein kinase
XLOC_006623	XP_011100765.1protein high chlorophyll fluorescent 107
XLOC_006638	PSS26473.1Hairy/enhancer-of-split related with YRPW motif-like protein
XLOC_006695	XP_022758113.1rho GTPase-activating protein 2
XLOC_006759	PSS28581.1G-type lectin S-receptor-like serine/threonine-protein kinase
XLOC_006792	PSS21775.1Hippocampus abundant transcript-like protein
XLOC_006804	PSR86026.1Sodium/hydrogen exchanger 2 like
XLOC_006874	PSS03072.1Pentatricopeptide repeat-containing protein
XLOC_006889	PSS13773.1Metal tolerance protein
XLOC_006934	OMO67315.1Methyltransferase type 11
XLOC_006952	PSR89479.1Cytochrome P450 71A8 like
XLOC_006956	PSS35219.1Protein KINESIN LIGHT CHAIN-RELATED like
XLOC_006965	GAV90428.1DUF1666 domain-containing protein
XLOC_006970	XP_010648268.1 E3 ubiquitin-protein ligase RHA2B-like
XLOC_006971	XP_010648275.1 RING-H2 finger protein ATL51
XLOC_007121	XP_027095835.1basic leucine zipper 43-like
XLOC_007124	---NA---
XLOC_007131	RVW56204.1MADS-box transcription factor ANR1
XLOC_007137	XP_010652384.1 NAC domain-containing protein 21/22
XLOC_007221	---NA---
XLOC_007265	PSS32374.1Receptor-like protein kinase
XLOC_007279	XP_011089377.1mitogen-activated protein kinase homolog NTF6
XLOC_007290	PSS10105.1Cyclin-U4-1 like
XLOC_007323	PSS24393.1Calcium-dependent protein kinase
XLOC_007337	PSS19704.1F-box protein
XLOC_007355	XP_007047117.2 B3 domain-containing protein Os01g0723500
XLOC_007363	AUD40387.1zeaxanthin epoxidase 2
XLOC_007420	XP_009778392.1 thioredoxin H-type
XLOC_007430	XP_016496895.1 GDSL esterase/lipase LTL1-like
XLOC_007472	XP_022894528.1protein SHI RELATED SEQUENCE 1-like
XLOC_007527	PSS08018.1GDP-fucose protein O-fucosyltransferase protein
XLOC_007557	PSS35285.1Sister chromatid cohesion 1 protein
XLOC_007635	PSS26780.1Inactive receptor kinase
XLOC_007676	PSS17244.1Origin of replication complex subunit like
XLOC_007682	RVW66694.1putative carboxylesterase 2
XLOC_007752	PSS08211.1Cinnamoyl-CoA reductase-like
XLOC_007769	PSS08001.1Cytochrome P450 78A5 like
XLOC_007854	PSS26683.1Ribonucleoside-diphosphate reductase large subunit like
XLOC_007879	RVW54074.1Transposon Ty3-I Gag-Pol polyprotein
XLOC_007925	PSS20996.1Anion transporter 6 like
XLOC_007946	PSS07711.1B3 domain-containing protein
XLOC_007992	PSS11904.1Two-component response regulator-like
XLOC_008029	PSS33130.1Subtilisin-like protease
XLOC_008042	PIN12737.1Ubiquitin fusion-degradation protein
XLOC_008044	PSS29473.1Zinc finger CCCH domain-containing protein
XLOC_008047	PSS26015.1Epimerase family protein like
XLOC_008079	RVW50247.1BTB/POZ domain-containing protein
XLOC_008085	PSS34901.1Heat stress transcription factor A-3 like
XLOC_008093	XP_009602689.1 CASP-like protein 2A1
XLOC_008108	XP_021988433.1ubiquitin recognition factor in ER-associated degradation protein 1-like
XLOC_008121	XP_010247817.1 methyl-CpG-binding domain-containing protein 11-like
XLOC_008178	RVW50459.1putative transcription factor KAN4
XLOC_008213	---NA---
XLOC_008236	XP_017251479.1 transcriptional regulator STERILE APETALA isoform X1
XLOC_008257	PNY10347.1bifunctional aspartokinase/homoserine dehydrogenase chloroplastic-like
XLOC_008264	XP_021625405.1very-long-chain enoyl-CoA reductase-like
XLOC_008353	PSR99917.1hypothetical protein CEY00_Acc23817
XLOC_008380	PSR98545.1Cyclin-D6-1 like
XLOC_008437	PSS09497.1Increased DNA methylation like
XLOC_008469	PSR96765.1Pentatricopeptide repeat-containing protein
XLOC_008480	XP_007150815.1hypothetical protein PHAVU_005G182800g
XLOC_008483	PSR93333.1Structural maintenance of chromosomes protein like
XLOC_008512	PSR95883.1DUF21 domain-containing protein
XLOC_008547	RQO85534.1hypothetical protein POPTR_001G293200
XLOC_008569	RVW48027.1Growth-regulating factor 3
XLOC_008596	PSR91217.1Protein MIZU-KUSSEI like
XLOC_008687	XP_024021230.1uncharacterized protein LOC21388890
XLOC_008722	XP_018857982.1 receptor-like protein kinase
XLOC_008737	PSR91872.1NADP-dependent glyceraldehyde-3-phosphate dehydrogenase
XLOC_008805	PSS35179.1Type I inositol polyphosphate 5-phosphatase
XLOC_008811	PSS26891.1Protein DETOXIFICATION like
XLOC_008837	XP_007200720.1CASP-like protein 5C1 isoform X1
XLOC_008862	---NA---
XLOC_008888	PSS33947.1Divinyl chlorophyllide a 8-vinyl-reductase
XLOC_008890	PSR87841.1ATP synthase subunit beta like
XLOC_008891	PSR87843.1Serine/threonine-protein kinase
XLOC_008915	PSS06297.1Eukaryotic translation initiation factor 4E transporter like
XLOC_008918	XP_011095764.1myb family transcription factor APL isoform X1
XLOC_008952	EOX92880.1Kinase superfamily protein
XLOC_008970	XP_021615847.1protein LATERAL ORGAN BOUNDARIES-like isoform X2
XLOC_008972	XP_011013494.1 disease resistance RPP13-like protein 4
XLOC_009010	---NA---
XLOC_009048	---NA---
XLOC_009072	PSS31440.1Transcription factor SPATULA like
XLOC_009102	PSR93245.1Protein NRT1/ PTR FAMILY 5.1 like
XLOC_009130	XP_007026104.1 5'-adenylylsulfate reductase 2, chloroplastic
XLOC_009131	PSR95953.1MADS-box transcription factor
XLOC_009171	PSS09466.1UPF0503 protein
XLOC_009211	GAV90624.1bHLH-MYC_N domain-containing protein
XLOC_009260	PSR91384.1PWWP domain protein
XLOC_009313	PQQ08214.1transcription factor bHLH18
XLOC_009363	PSS29026.1Polyribonucleotide nucleotidyltransferase
XLOC_009374	PSS26478.1Structural maintenance of chromosomes protein
XLOC_009381	PSS15503.1Heat shock factor protein
XLOC_009446	CAN88869.1D7-type cyclin
XLOC_009496	AOY34376.1transcription factor BHLH005
XLOC_009497	GAV82618.1DUF3675 domain-containing protein/RINGv domain-containing protein
XLOC_009529	PON53619.1Proteinase inhibitor I3, Kunitz legume
XLOC_009562	PSS05918.1Fatty-acid-binding protein
XLOC_009616	PSS06378.1Inactive patatin-like protein
XLOC_009627	PSS11119.1Tensin-1 like
XLOC_009637	XP_010655770.1 berberine bridge enzyme-like 14
XLOC_009668	XP_021677928.1zinc finger protein ZAT1-like
XLOC_009685	PSS28694.1HIPL1 protein
XLOC_009687	PSS28694.1HIPL1 protein
XLOC_009701	XP_021650643.1dof zinc finger protein DOF5.6
XLOC_009702	PSS07780.150S ribosomal protein like
XLOC_009734	AGD98713.1aquaporin protein 10
XLOC_009735	AGD98713.1aquaporin protein 10
XLOC_009766	PSS01301.1Vacuolar protein sorting-associated protein
XLOC_009767	PSS01301.1Vacuolar protein sorting-associated protein
XLOC_009768	PSS01301.1Vacuolar protein sorting-associated protein
XLOC_010010	PSS31181.1Fanconi anemia group J protein
XLOC_010036	PSR87783.1Receptor-like protein kinase
XLOC_010059	PSR89484.1Protein ABHD17C like
XLOC_010137	PSR93478.1Expansin-like like
XLOC_010143	XP_022849491.1root phototropism protein 2 isoform X1
XLOC_010177	PSS00052.1Serine-rich adhesin for platelets like
XLOC_010181	PSS31707.1Cellulose synthase A catalytic subunit 2 [UDP-forming] like
XLOC_010238	PSS33781.1hypothetical protein CEY00_Acc04181
XLOC_010283	PSR87873.1Kinesin-like protein
XLOC_010307	XP_022867623.1uncharacterized protein LOC111387306
XLOC_010341	PSS05960.1Rho GDP-dissociation inhibitor like
XLOC_010377	PSS14345.1Protein IQ-DOMAIN like
XLOC_010439	XP_002270329.1 omega-hydroxypalmitate O-feruloyl transferase
XLOC_010484	PSS31659.1Heavy metal-associated isoprenylated plant protein
XLOC_010530	AFB82644.1NAC transcription factor
XLOC_010542	AYA60148.1vacuolar amino acid transporter 3
XLOC_010544	PSR88310.1Coiled-coil domain-containing protein
XLOC_010648	PIN16708.1Stress responsive protein
XLOC_010661	XP_027185678.1membrane protein PM19L
XLOC_010680	PSS19226.1Glucose/ribitol dehydrogenase protein
XLOC_010685	XP_011005317.1 protein CHUP1, chloroplastic-like
XLOC_010756	PSS30461.1Zinc-finger homeodomain protein
XLOC_010763	PSR95701.1Nuclear pore complex protein like
XLOC_010776	PSS15833.1Protein downstream neighbor of Son like
XLOC_010778	XP_023904493.1probable carboxylesterase 15
XLOC_010795	EOX96542.1Nucleotide-diphospho-sugar transferase family protein
XLOC_010815	ADJ67431.1ethylene response factor 2
XLOC_010863	PSS31328.1Isoflavone reductase-like protein
XLOC_010900	PSS00197.1AAA+ ATPase domain protein
XLOC_011092	PSS15837.1Atrophin-1 like
XLOC_011111	---NA---
XLOC_011139	---NA---
XLOC_011145	XP_023920989.1UDP-glycosyltransferase 87A1-like
XLOC_011149	BAQ19377.1filamentous flower
XLOC_011156	PSR96725.1Manganese-dependent ADP-ribose/CDP-alcohol diphosphatase
XLOC_011188	PSS13638.1RING finger protein
XLOC_011280	XP_011100039.1serine/threonine-protein kinase SAPK2
XLOC_011285	---NA---
XLOC_011288	---NA---
XLOC_011314	---NA---
XLOC_011319	---NA---
XLOC_011343	PSS01374.1Purple acid phosphatase
XLOC_011365	PSS01329.1Triose-phosphate transporter domain protein
XLOC_011370	PSR93223.1Ferritin-3 like
XLOC_011385	PSR86358.1Phosphatidylinositol/phosphatidylcholine transfer protein
XLOC_011425	XP_011084873.1eukaryotic translation initiation factor 2 subunit alpha homolog
XLOC_011427	PSS01512.1Flocculation protein
XLOC_011443	PSR95814.1Transcription factor like
XLOC_011464	PSS10150.1Heavy metal-associated isoprenylated plant protein
XLOC_011489	---NA---
XLOC_011504	PSR95915.1Protein STICHEL-like
XLOC_011536	XP_020274868.160S acidic ribosomal protein P1-like
XLOC_011539	XP_011019014.1 expansin-A8-like
XLOC_011557	XP_022861703.1thioredoxin-like protein AAED1, chloroplastic isoform X1
XLOC_011558	ACH87169.1MYB transcription factor
XLOC_011597	XP_027148847.1E3 ubiquitin-protein ligase ATL23
XLOC_011728	PSS17438.13-ketoacyl-CoA synthase
XLOC_011794	PSR98331.1AT-hook motif nuclear-localized protein
XLOC_011894	PSS07593.1Chaperone protein like
XLOC_011902	---NA---
XLOC_011912	---NA---
XLOC_011935	PSS21263.1UPF0481 protein
XLOC_011941	XP_002270296.1PREDICTED: uncharacterized protein LOC100258796
XLOC_011964	PSS11693.1Ferric reduction oxidase
XLOC_011993	PSS31867.1TVP38/TMEM64 family membrane protein like
XLOC_012026	---NA---
XLOC_012057	NP_001313004.1galactinol synthase 2
XLOC_012117	PSS19328.1Proline-rich protein
XLOC_012156	RVW52381.1U-box domain-containing protein 52
XLOC_012171	---NA---
XLOC_012175	PSR93189.1Myosin-5 like
XLOC_012254	GAV62472.1DUF260 domain-containing protein
XLOC_012305	PSS34666.1GDSL esterase/lipase
XLOC_012329	AZP01947.1cytochrome P450 CYP736A225
XLOC_012339	PSS07933.1Ribulose-phosphate 3-epimerase
XLOC_012372	XP_019151218.1 pentatricopeptide repeat-containing protein At5g21222-like
XLOC_012388	RWR77459.1putative inactive receptor kinase
XLOC_012402	PSS28644.1Transcription factor bHLH155 like
XLOC_012404	AAK91878.1Putative copia-type pol polyprotein
XLOC_012409	XP_027083311.1scarecrow-like protein 28
XLOC_012435	---NA---
XLOC_012477	PSS30589.1Crossover junction endonuclease
XLOC_012587	XP_022892162.1uncharacterized protein LOC111407058
XLOC_012619	PSR93398.1Calcium-dependent protein kinase
XLOC_012623	PSR93398.1Calcium-dependent protein kinase
XLOC_012637	ARE30661.1putative invertase inhibitor InvInh2
XLOC_012662	XP_012091879.160S ribosomal protein L32-1
XLOC_012680	PSR91179.1NADH-ubiquinone oxidoreductase
XLOC_012771	PSS15947.1Cytochrome P450 94C1 like
XLOC_012796	PSR95465.1Increased rDNA silencing protein
XLOC_012824	XP_021651709.1AP2-like ethylene-responsive transcription factor At1g79700
XLOC_012943	XP_024047909.1uncharacterized protein LOC112101466
XLOC_012949	XP_003632087.1 UDP-glycosyltransferase 74E2
XLOC_012957	XP_009342812.1 nuclear transcription factor Y subunit B-1-like
XLOC_013007	PSS07375.1Choline monooxygenase
XLOC_013015	PSR85376.1RAN GTPase-activating protein
XLOC_013067	PSR91647.1Pentatricopeptide repeat-containing protein
XLOC_013079	AVZ45855.1gibberellin 2-oxidase 4
XLOC_013103	PSR95973.1Auxin response factor 2 like
XLOC_013117	XP_002283504.2 growth-regulating factor 1
XLOC_013122	---NA---
XLOC_013182	---NA---
XLOC_013184	PSS31799.1E3 ubiquitin-protein like
XLOC_013253	PSR86307.1Glyoxalase-like domain protein
XLOC_013262	OMO93588.1 ABIL2
XLOC_013270	PSS07219.1Protein STRUBBELIG-RECEPTOR FAMILY 5 like
XLOC_013336	AEQ37175.1xyloglucan endotransglucosylase/hydrolase
XLOC_013340	PSS04783.1CASP-like protein
XLOC_013345	XP_010686499.1 DNA-directed RNA polymerase II subunit RPB2
XLOC_013350	PSR92750.1Protein NETWORKED 1A like
XLOC_013443	EOY11484.1Histone H2A 7
XLOC_013444	XP_012071481.1NADP-dependent glyceraldehyde-3-phosphate dehydrogenase
XLOC_013445	PSR96989.1FMN-binding split barrel protein
XLOC_013447	XP_017973835.1 homeobox-leucine zipper protein HDG11
XLOC_013491	PSR87792.1Solute carrier organic anion transporter family member 1B7 like
XLOC_013506	RVW53076.1GDSL esterase/lipase
XLOC_013538	---NA---
XLOC_013569	PSR96093.1Histone H2A variant like
XLOC_013574	---NA---
XLOC_013580	AGC08426.1lipid transfer protein
XLOC_013664	XP_027087927.13-ketoacyl-CoA synthase 12-like
XLOC_013665	XP_021643482.1phosphatidylinositol/phosphatidylcholine transfer protein SFH11-like isoform X1
XLOC_013695	PON57718.1Zinc finger, FYVE/PHD-type
XLOC_013706	PSS34645.1UPF0481 protein
XLOC_013718	XP_021638895.1subtilisin-like protease SBT1.4
XLOC_013724	XP_015884661.1leishmanolysin-like peptidase
XLOC_013733	OMO85605.1KIP1-like protein
XLOC_013749	PSS23752.1Short-chain dehydrogenase TIC 32 like
XLOC_013760	XP_010654132.1 transcription repressor OFP6
XLOC_013769	XP_002281889.1 BEL1-like homeodomain protein 4
XLOC_013813	PSR87794.1BRCT domain-containing protein
XLOC_013840	PSS06419.1hypothetical protein CEY00_Acc19549
XLOC_013841	XP_012435846.1 non-specific lipid transfer protein-like 1
XLOC_013890	PSR98464.1Alpha carbonic anhydrase
XLOC_013895	---NA---
XLOC_013905	XP_002269182.1 probable galacturonosyltransferase-like 1
XLOC_013927	PSS35319.1B3 domain-containing transcription factor
XLOC_013948	XP_012466169.1 protein SHI RELATED SEQUENCE 5-like
XLOC_013949	XP_012466169.1 protein SHI RELATED SEQUENCE 5-like
XLOC_013962	PSS11266.1Subtilisin-like protease
XLOC_013964	XP_022892978.1probable E3 ubiquitin-protein ligase RHA1A
XLOC_014090	XP_021835144.1E3 ubiquitin-protein ligase SP1 isoform X1
XLOC_014156	PSR98055.1Phosphoglucan phosphatase DSP4
XLOC_014159	PSR92974.1GPI-anchored adhesin-like protein precursor
XLOC_014281	GAV75635.1FDF domain-containing protein/LSM14 domain-containing protein
XLOC_014303	PSS13480.1EGF domain-specific O-linked N-acetylglucosamine transferase
XLOC_014337	PSS17710.1GPI-anchored adhesin-like protein precursor
XLOC_014379	XP_023895324.1uncharacterized protein LOC112007237
XLOC_014406	---NA---
XLOC_014413	XP_027363169.1calcium-dependent protein kinase 1-like isoform X2
XLOC_014459	XP_002266350.1PREDICTED: uncharacterized protein LOC100245159
XLOC_014541	PSS26231.1MMS19 nucleotide excision repair protein
XLOC_014580	PSS15720.1Location of vulva defective 1 like
XLOC_014598	PSR89309.1Zinc transporter 4 like
XLOC_014682	GAV65578.1HMA domain-containing protein
XLOC_014685	OVA14012.1Major intrinsic protein
XLOC_014702	PSS31426.1Methyltransferase PMT5
XLOC_014720	---NA---
XLOC_014759	PSR86169.1Protein O-glucosyltransferase
XLOC_014794	AFX74875.1MADS domain transcription factor APL2
XLOC_014811	PSR92977.1Myosin-11 like
XLOC_014863	---NA---
XLOC_014868	PSS33127.1Xyloglucan galactosyltransferase
XLOC_014872	RVW17312.1Desiccation-related protein PCC13-62
XLOC_014883	PSS32673.1Mitogen-activated protein kinase-binding protein like
XLOC_014886	PSR85082.1Protein RESTRICTED TEV MOVEMENT like
XLOC_014895	XP_002275043.1 calvin cycle protein CP12-1, chloroplastic
XLOC_015016	XP_027099459.1protein SSUH2 homolog
XLOC_015022	---NA---
XLOC_015104	PSS34645.1UPF0481 protein
XLOC_015113	PSS36526.1Protein SHI RELATED SEQUENCE like
XLOC_015120	---NA---
XLOC_015234	RVX09682.1Serine/threonine-protein kinase Nek6
XLOC_015256	PSS17179.1Monosaccharide-sensing protein
XLOC_015362	PSS35190.1Transmembrane protein like
XLOC_015417	PSS35201.1RING-H2 finger protein
XLOC_015440	PSR88144.1NAD(P)H-quinone oxidoreductase subunit L like
XLOC_015488	PSR89401.1Random slug protein
XLOC_015489	XP_002511083.1floricaula/leafy homolog
XLOC_015499	XP_019196762.1 calcium-transporting ATPase 9, plasma membrane-type-like isoform X1
XLOC_015561	PSS24736.1Topoisomerase I damage affected protein
XLOC_015571	AML79205.1putative LOV domain-containing protein
XLOC_015572	XP_010651276.1 two-component response regulator ORR21 isoform X1
XLOC_015634	XP_021295312.1protein NRT1/ PTR FAMILY 5.6-like isoform X1
XLOC_015649	PSS04724.1Disease resistance protein
XLOC_015658	PSS10043.1Protein phosphatase Slingshot 1 like
XLOC_015670	XP_020533637.1protein O-linked-mannose beta-1,4-N-acetylglucosaminyltransferase 2
XLOC_015680	---NA---
XLOC_015754	PSR89445.1HVA22-like protein
XLOC_015846	AJB84625.1violaxanthin de-epoxidase
XLOC_015882	PSS31806.1Ribonucleoprotein like
XLOC_015898	PSS02851.1Kinetochore protein
XLOC_015922	PSS29226.1ATP-dependent RNA helicase
XLOC_015927	OMO88557.1Nitroreductase-like protein
XLOC_016080	ACI14382.1cinnamoyl-CoA reductase
XLOC_016091	PSR92893.1SWI/SNF-related matrix-associated actin-dependent regulator of chromatin subfamily A member 3-like
XLOC_016126	PSS30616.1Acidic leucine-rich nuclear phosphoprotein 32 family member B like
XLOC_016152	PSS36338.1Extracellular matrix protein
XLOC_016208	XP_018506372.1 pentatricopeptide repeat-containing protein At1g32415, mitochondrial-like
XLOC_016227	XP_024438554.1RING-H2 finger protein ATL46
XLOC_016229	PSS01765.1Nucleoredoxin 1-1 like
XLOC_016230	PON46061.1Transmembrane protein
XLOC_016234	PSR92909.1AT-hook motif nuclear-localized protein
XLOC_016250	PSS15816.1Subtilisin-like protease
XLOC_016268	XP_010273838.1 guanine nucleotide-binding protein alpha-1 subunit-like isoform X2
XLOC_016270	RHN57689.1putative ubiquitinyl hydrolase 1
XLOC_016271	XP_010264964.1 glycolipid transfer protein 1-like
XLOC_016284	---NA---
XLOC_016288	XP_002269670.2 BEL1-like homeodomain protein 2
XLOC_016293	PSS13802.1DNA polymerase delta small subunit like
XLOC_016310	PSS31454.1Transcription factor bHLH155 like
XLOC_016333	PSS32392.1Leucine-rich repeat receptor protein kinase
XLOC_016381	PSS26261.1Nucleosomal histone kinase
XLOC_016416	PSS14046.1BRCA1-associated RING domain protein
XLOC_016446	XP_022728582.1zinc finger protein ZAT9-like
XLOC_016501	PSS05675.1NAC domain-containing protein
XLOC_016508	NP_001305525.1galactinol synthase 2
XLOC_016544	XP_022854516.1probable beta-D-xylosidase 5
XLOC_016556	PSS05947.1Protein NRT1/ PTR FAMILY 6.4 like
XLOC_016605	XP_027162233.1putative late blight resistance protein homolog R1A-3 isoform X1
XLOC_016658	PSR99586.1Peptide chain release factor 1 like
XLOC_016662	PSS10418.1Cytochrome b561 and DOMON domain-containing protein
XLOC_016704	PSS16114.1GDSL esterase/lipase
XLOC_016707	---NA---
XLOC_016760	PSS34720.1Protein BREAST CANCER SUSCEPTIBILITY 2 B like
XLOC_016761	PSS17663.1Protein DETOXIFICATION 44 like
XLOC_016767	---NA---
XLOC_016813	AYA60148.1vacuolar amino acid transporter 3
XLOC_016856	PSS35201.1RING-H2 finger protein
XLOC_016893	PSR89883.1RAB6-interacting golgin like
XLOC_016910	---NA---
XLOC_017032	PRQ40390.1putative heavy metal-associated domain, HMA
XLOC_017048	PSS05996.1Peptidyl-prolyl cis-trans isomerase
XLOC_017070	PSR89078.1DExH-box ATP-dependent RNA helicase
XLOC_017109	RWR78944.1Biotin/lipoyl attachment
XLOC_017172	PSS01820.1Zinc finger protein
XLOC_017201	XP_023873305.1LRR receptor-like serine/threonine-protein kinase GSO1
XLOC_017213	PSS01300.1Doublesex- and mab-3-related transcription factor
XLOC_017224	PSR95641.1Calcium/calmodulin-regulated receptor-like kinase
XLOC_017233	XP_002275098.1 BEL1-like homeodomain protein 1
XLOC_017236	PSS14320.1Zinc finger protein like
XLOC_017250	AYA60139.1lysine histidine transporter 2
XLOC_017265	PSS19639.1Increased DNA methylation like
XLOC_017389	PSS32391.1Protein Rev like
XLOC_017427	---NA---
XLOC_017434	AZL19538.1transcription factor GLK2
XLOC_017476	XP_002279109.1 translation machinery-associated protein 22
XLOC_017522	XP_023886287.1 phosphatidylinositol/phosphatidylcholine transfer protein SFH13-like
XLOC_017602	APD70959.1SPOROCYTELESS-like EAR-containing protein 1
XLOC_017603	PSS24596.1Protein IQ-DOMAIN like
XLOC_017695	XP_010258093.1 transcription factor MYB34-like
XLOC_017755	PSS00175.1GDSL esterase/lipase
XLOC_017778	AES87033.2 DUF674 family protein
XLOC_017946	PSR85414.1Triose-phosphate transporter domain protein
XLOC_017958	---NA---
XLOC_017963	XP_003555901.13-ketoacyl-CoA synthase 6
XLOC_017996	PSS11403.1Kinesin-like protein
XLOC_018078	---NA---
XLOC_018096	PSS36470.1Cytochrome P450 90B1 like
XLOC_018111	PSR87889.1Xyloglucan endotransglucosylase/hydrolase protein
XLOC_018150	XP_027106656.1eukaryotic translation initiation factor 3 subunit B-like
XLOC_018155	PSS24838.1Protein ECERIFERUM like
XLOC_018169	XP_023757502.1probable serine/threonine-protein kinase At4g35230
XLOC_018235	XP_011096430.1U-box domain-containing protein 4-like
XLOC_018243	PSS01219.1Late embryogenesis abundant protein, LEA-14 protein
XLOC_018248	PON89020.1cytochrome P450 family protein
XLOC_018267	PSR91006.1Receptor protein kinase
XLOC_018273	PSR88155.1Kirola like
XLOC_018313	---NA---
XLOC_018340	PSS31356.1DeSI-like protein
XLOC_018342	PSR98655.1Cyclin-D-binding Myb-like transcription factor
XLOC_018372	PSS02808.1CAMP-specific 3',5'-cyclic phosphodiesterase
XLOC_018397	EOY11667.1Galactose oxidase/kelch repeat superfamily protein, putative isoform 1
XLOC_018412	PSS08394.1Cytochrome P450 CYP736A12 like
XLOC_018533	PSR91788.1Bark storage protein like
XLOC_018585	PSS17958.1ABC transporter G family member 36 like
XLOC_018625	PSS30519.1Transcription initiation factor TFIID subunit like
XLOC_018641	PSS19531.1Sphinganine C4-monooxygenase
XLOC_018678	PSS04100.1Protein DETOXIFICATION like
XLOC_018688	XP_010277428.1 probable aminotransferase ACS12
XLOC_018736	RVW17601.1Protein lateral root primordium 1
XLOC_018829	---NA---
XLOC_018924	XP_027149572.1pathogenesis-related protein 5-like
XLOC_018936	XP_026450021.1probable galacturonosyltransferase-like 4
XLOC_018945	PSR86222.1Structure-specific endonuclease
XLOC_018957	PSR86883.1Pentatricopeptide repeat-containing protein
XLOC_018969	XP_011091821.1(+)-neomenthol dehydrogenase
XLOC_018986	---NA---
XLOC_019004	PSR96241.1B-box zinc finger protein
XLOC_019054	PSS35196.1Protein ALTERED XYLOGLUCAN 4-like
XLOC_019065	XP_011069846.1RING-H2 finger protein ATL13
XLOC_019070	PSS05929.1B-box zinc finger protein
XLOC_019099	PSR85105.1Serine hydroxymethyltransferase
XLOC_019117	XP_010650135.1 transcription initiation factor TFIID subunit 7-like
XLOC_019208	PSR87888.1MEPFL2 like
XLOC_019215	PSR87882.1ATP-dependent 6-phosphofructokinase
XLOC_019312	XP_006346208.1 probable beta-1,3-galactosyltransferase 2
XLOC_019314	XP_019193640.1 probable beta-1,3-galactosyltransferase 2
XLOC_019369	XP_023920774.1receptor-like protein Cf-9
XLOC_019427	PSR93376.1LRR receptor-like serine/threonine-protein kinase
XLOC_019521	PSR89855.1Rho GTPase-activating protein
XLOC_019523	XP_021278294.1protein FANTASTIC FOUR 1
XLOC_019533	PSS08231.1Glutamate receptor 3.2 like
XLOC_019545	PSR96703.1Diphthine methyltransferase
XLOC_019547	PSR89574.1Leaf rust 10 disease-resistance locus receptor-like protein kinase
XLOC_019565	PSS04313.1Transcription factor bHLH87 like
XLOC_019578	XP_023879927.1purple acid phosphatase 3-like
XLOC_019628	PSS16142.1Mitogen-activated protein kinase kinase
XLOC_019663	PSS05949.1Nucleobase-ascorbate transporter like
XLOC_019674	XP_015884719.1NADP-dependent glyceraldehyde-3-phosphate dehydrogenase-like isoform X2
XLOC_019710	XP_027113237.1protein DMP3-like
XLOC_019758	PSS21134.1Xaa-Pro aminopeptidase P
XLOC_019876	OTG25549.1putative histone H27
XLOC_019909	PSR87952.1Cadmium/zinc-transporting ATPase
XLOC_019945	PSR87550.1Beta-1,4-mannosyl-glycoprotein like
XLOC_019985	PSS15807.1Inactive leucine-rich repeat receptor-like protein kinase
XLOC_020001	PSS07667.1Molybdenum cofactor sulfurase
XLOC_020023	XP_001865168.1histone 1
XLOC_020033	GAV76008.1DUF1517 domain-containing protein
XLOC_020088	XP_011038888.1 homeobox-leucine zipper protein ATHB-7
XLOC_020093	XP_007051457.2 transcription factor bHLH14
XLOC_020098	XP_007051457.2 transcription factor bHLH14
XLOC_020174	XP_002278966.1 protein transport Sec1a isoform X1
XLOC_020199	---NA---
XLOC_020207	XP_021601835.1dehydrogenase/reductase SDR family member 12-like
XLOC_020268	PSR95794.1Ribulose-phosphate 3-epimerase
XLOC_020286	XP_015577559.1phosphatidylinositol 4-kinase gamma 8
XLOC_020292	PSS29332.140S ribosomal protein
XLOC_020386	XP_010059793.1 1-(5-phosphoribosyl)-5-[(5-phosphoribosylamino)methylideneamino] imidazole-4-carboxamide isomerase, chloroplastic
XLOC_020428	PSR92448.1CBL-interacting serine/threonine-protein kinase
XLOC_020448	PSS03136.1 CEN-like protein
XLOC_020500	PSS23779.1Aldo-keto reductase family 4 member like
XLOC_020509	PSR96263.1Cell division protein FtsZ 1 like
XLOC_020524	PSS29514.1Anti-sigma-I factor RsgI6 like
XLOC_020528	PSS12075.1Amino acid permease
XLOC_020545	PSS32849.1GDSL esterase/lipase
XLOC_020562	XP_002278041.1 putative disease resistance protein RGA4
XLOC_020737	PSS06387.1Protein trichome birefringence-like
XLOC_020847	PSR87637.1Thaumatin-like protein
XLOC_020905	---NA---
XLOC_020918	---NA---
XLOC_020921	XP_024463698.1protein NRT1/ PTR FAMILY 8.1
XLOC_020959	PSS35288.1Ankyrin-3 like
XLOC_021018	PSS09415.1Low-temperature-induced protein
XLOC_021033	PSS26336.1Transcription factor like
XLOC_021060	---NA---
XLOC_021167	XP_012829121.1 7-hydroxymethyl chlorophyll a reductase, chloroplastic
XLOC_021266	---NA---
XLOC_021380	XP_018836299.1 7-hydroxymethyl chlorophyll a reductase, chloroplastic
XLOC_021390	PSS05645.1Polyadenylate-binding protein
XLOC_021433	---NA---
XLOC_021452	PSR99510.1Serine/threonine-protein kinase
XLOC_021498	XP_002268282.1 probable beta-1,3-galactosyltransferase 2 isoform X1
XLOC_021553	PSS04897.1Cytochrome P450 87A3 like
XLOC_021601	PSS18156.1Protein FAM133B like
XLOC_021652	PSS32256.1S-norcoclaurine synthase
XLOC_021695	PSS21267.1Inactive receptor kinase
XLOC_021735	XP_022977103.1LIM domain-containing protein WLIM1-like
XLOC_021736	XP_022977103.1LIM domain-containing protein WLIM1-like
XLOC_021821	XP_018841116.1 zinc-finger homeodomain protein 2-like
XLOC_021825	PSS31158.1AT-hook motif nuclear-localized protein
XLOC_021845	XP_023886424.1xanthohumol 4'-O-methyltransferase-like
XLOC_021849	PSS05738.1Serine/threonine-protein kinase
XLOC_021962	PSR85124.1Dehydrogenase/reductase SDR family member protein
XLOC_021973	XP_007206699.1protein SPA, chloroplastic
XLOC_021995	XP_019243962.1 transcription termination factor MTERF2, chloroplastic isoform X1
XLOC_022049	PSS30040.1Legume lectin domain protein
XLOC_022131	XP_018831281.1 transcription factor CPC-like isoform X2
XLOC_022229	PSR99545.1High mobility group B protein like
XLOC_022284	XP_018854711.1 probable WRKY transcription factor 12
XLOC_022285	XP_012435495.1 nucleoside diphosphate kinase B-like
XLOC_022401	PSR89614.1Paired amphipathic helix protein Sin3-like
XLOC_022426	PSS07364.1Dof zinc finger protein like
XLOC_022450	PSS17854.1Methyl-CpG-binding domain-containing protein
XLOC_022474	PSR96964.1Auxin-responsive protein
XLOC_022496	PSS08111.1Reticulon-like protein
XLOC_022512	PSR92506.1Zinc finger protein like
XLOC_022529	PON72820.1Pectate lyase
XLOC_022551	PSS26301.1Delta(8)-fatty-acid desaturase
XLOC_022679	PSS13394.1Chaperone protein like
XLOC_022697	PSS04576.1Alcohol dehydrogenase-like
XLOC_022781	PSR88238.1CLE13p like
XLOC_022800	PSS29916.1Kinesin-like protein
XLOC_022833	PSR89365.1Protein LOW PSII ACCUMULATION 3 like
XLOC_022896	PRQ26031.1putative ankyrin repeat-containing domain, PGG domain-containing protein
XLOC_022902	XP_027095902.1CLAVATA3/ESR (CLE)-related protein 43 isoform X1
XLOC_022943	XP_002264923.1 protein LNK1
XLOC_022948	PSS09495.1Omega-3 fatty acid desaturase, endoplasmic reticulum like
XLOC_023047	---NA---
XLOC_023065	PSR84996.1Alpha-1,4 glucan phosphorylase L-2 isozyme/amyloplastic like
XLOC_023076	PSR92645.1CASP-like protein
XLOC_023135	XP_022740314.1nitrate regulatory gene2 protein-like
XLOC_023139	RVW51605.1 Nitrate regulatory gene2 protein
XLOC_023157	RDX61065.1MORC family CW-type zinc finger protein 3
XLOC_023159	PSS10302.1Disease resistance protein
XLOC_023163	XP_002299944.2transcription factor MYB83
XLOC_023208	XP_002517441.1AAA-ATPase ASD, mitochondrial
XLOC_023258	PSR95943.1Ribonucleoside-diphosphate reductase small chain like
XLOC_023262	PSS03933.1Ethylene-responsive transcription factor
XLOC_023278	PSR89770.150S ribosomal protein like
XLOC_023280	RVW42112.1Alpha-1,4 glucan phosphorylase L-2 isozyme, chloroplastic/amyloplastic
XLOC_023334	XP_018852933.1 beta-D-glucosyl crocetin beta-1,6-glucosyltransferase-like
XLOC_023338	PSS10275.1Nonribosomal peptide synthetase
XLOC_023354	XP_011078851.1FT-interacting protein 1
XLOC_023386	PSS26778.1Cysteine-rich repeat secretory protein like
XLOC_023389	XP_022858865.1cytochrome b561 and DOMON domain-containing protein At4g17280-like
XLOC_023407	XP_010655447.1 putative E3 ubiquitin-protein ligase RING1a isoform X4
XLOC_023519	XP_002273550.1 short-chain dehydrogenase TIC 32, chloroplastic
XLOC_023546	PSS34861.1Ubiquitin carboxyl-terminal hydrolase like
XLOC_023561	---NA---
XLOC_023575	PSS24068.1B-box zinc finger protein
XLOC_023615	PSS19130.1Annexin-like protein
XLOC_023709	PSS34786.1LRR receptor-like serine/threonine-protein kinase
XLOC_023723	GAV61227.1DUF3537 domain-containing protein
XLOC_023735	AHC32017.1aquaporin protein 23
XLOC_023801	XP_022842361.1protein SRC2 homolog
XLOC_023804	PSS04382.1UPF0496 protein
XLOC_023851	EOX97859.1Fructose-bisphosphate aldolase 1
XLOC_023968	---NA---
XLOC_024033	XP_021274153.1zinc-finger homeodomain protein 6
XLOC_024132	KHG09017.1 Chaperone htpG
XLOC_024169	XP_027086789.1lactoylglutathione lyase GLX1-like
XLOC_024220	XP_017255672.1 NAD(P)H-quinone oxidoreductase subunit N, chloroplastic
XLOC_024314	PSR89428.1CASP-like protein
XLOC_024353	XP_023876878.1putative disease resistance protein RGA4
XLOC_024369	PSR98288.1Pyrimidine 5-nucleotidase protein
XLOC_024390	PSS07383.1Polyadenylate-binding protein like
XLOC_024460	XP_021656004.1ABC transporter G family member 11-like
XLOC_024467	XP_015381643.1uncharacterized protein LOC107174908
XLOC_024555	AZI71056.1regulatory protein NPR1
XLOC_024595	PSS28700.1Protein NRT1/ PTR FAMILY 2.13 like
XLOC_024620	PSS15437.1Disks large like
XLOC_024819	PSS36564.1Serine/threonine-protein kinase MRCK beta like
XLOC_024896	---NA---
XLOC_024939	XP_010250473.1 T-complex protein 1 subunit delta
XLOC_024980	---NA---
XLOC_024987	PSR99655.1Abscisic acid 8'-hydroxylase
XLOC_025016	PSS31334.1Zinc-finger homeodomain protein
XLOC_025022	PSS18992.1TVP38/TMEM64 family membrane protein like
XLOC_025092	PSS08338.1NDR1/HIN1-Like protein
XLOC_025133	PSS17917.1IST1-like protein
XLOC_025134	PSS04685.1Chaperonin-like RBCX protein
XLOC_025330	PSR91235.1Acetyl-coenzyme A carboxylase carboxyl transferase subunit beta like
XLOC_025341	PSS23932.1Xyloglucan endotransglucosylase/hydrolase
XLOC_025402	PSS05987.1Membrane-associated kinase regulator
XLOC_025418	PSS26266.1Serine/threonine-protein kinase
XLOC_025498	PSS04881.1Glucan endo-1,3-beta-glucosidase
XLOC_025517	PSS21090.1Myb-related protein
XLOC_025518	PSR85040.1Protein NRT1/ PTR FAMILY 2.13 like
XLOC_025537	---NA---
XLOC_025601	PSS01119.1Histone acetyltransferase
XLOC_025665	XP_002281202.1 mitogen-activated protein kinase kinase kinase 1
XLOC_025725	PSS11637.1E3 ubiquitin-protein ligase
XLOC_025744	PSR89059.1L-Ala-D/L-amino acid epimerase
XLOC_025760	PSR84755.1Molybdenum cofactor sulfurase
XLOC_025792	PSS35048.1OTU domain-containing protein
XLOC_025803	PSS31786.1GDP-fucose protein O-fucosyltransferase protein
XLOC_025811	PSS33214.1Ethylene-responsive transcription factor 5 like
XLOC_025830	---NA---
XLOC_025868	XP_019196021.1 GDSL esterase/lipase CPRD49 isoform X1
XLOC_025874	XP_021685498.1peroxidase 72-like
XLOC_025878	ACD56615.1predicted protein
XLOC_025956	PSS01765.1Nucleoredoxin 1-1 like
XLOC_026066	XP_006471209.1zinc finger protein ZPR1-like
XLOC_026111	---NA---
XLOC_026201	PSS11119.1Tensin-1 like
XLOC_026222	---NA---
XLOC_026238	PSS07667.1Molybdenum cofactor sulfurase
XLOC_026271	XP_022883538.1brassinosteroid LRR receptor kinase BRI1-like
XLOC_026294	XP_009592523.1 probable carboxylesterase 8
XLOC_026395	PSS09770.1LysM domain receptor-like kinase
XLOC_026503	PSR86602.1E3 ubiquitin-protein ligase MARCH10
XLOC_026510	PSR89662.1Arabinosyltransferase ARAD1
XLOC_026541	PSS20972.1Protein ENHANCED DISEASE RESISTANCE like
XLOC_026566	PSR84792.1Thimet oligopeptidase
XLOC_026608	PSS24093.1Chromosome transmission fidelity protein
XLOC_026624	PSS08418.1Monogalactosyldiacylglycerol synthase
XLOC_026727	AOY34389.1transcription factor BHLH018
XLOC_026801	PSS11990.1Serine--tRNA ligase
XLOC_026983	PSS26789.1Rhamnogalacturonate lyase
XLOC_027141	---NA---
XLOC_027189	---NA---
XLOC_027291	PSS07703.1UbiB domain protein
XLOC_027307	---NA---
XLOC_027344	PSR93626.1LRR receptor-like serine/threonine-protein kinase
XLOC_027351	PSR84510.1Protein kinase C and casein kinase substrate in neurons protein
XLOC_027404	PSS19266.1Aspartic proteinase-like protein
XLOC_027432	PSR93421.1Homeobox-leucine zipper protein like
XLOC_027645	PSS08412.1Glutamate--tRNA ligase
XLOC_027667	PIN17193.1Molecular chaperone (small heat-shock protein Hsp26/Hsp42)
XLOC_027714	PSR89417.1Auxin response factor 2 like
XLOC_027830	PSR99937.1Transcription repressor like
XLOC_027964	RVW49196.1Retrovirus-related Pol polyprotein from transposon TNT 1-94
XLOC_027978	NP_001313004.1galactinol synthase 2
XLOC_028169	PSS14470.1Zinc finger CCCH domain-containing protein
XLOC_028313	PSR89866.1Nuclear transcription factor Y subunit alpha like
XLOC_028417	PSS23848.1Protein trichome birefringence-like
XLOC_028448	PSS05590.1Phytosulfokine receptor 2 like
XLOC_028532	PSR98613.1Methionine--tRNA ligase
XLOC_028587	XP_021598259.1putative serine/threonine-protein kinase isoform X2
XLOC_028641	AKP06508.1gibberellin 20 oxidase 1
XLOC_028706	---NA---
XLOC_028707	PSS31428.1Protein DCL like
XLOC_028752	PSS01801.1Histone-lysine N-methyltransferase
XLOC_028765	---NA---
XLOC_028809	XP_011073815.1putative disease resistance protein At1g50180
XLOC_028829	XP_021298568.1boron transporter 4
XLOC_028834	PSR96041.1Acyl-protein like
XLOC_028842	OMP00105.1Disease resistance protein
XLOC_028856	XP_022722860.1myb-like protein X isoform X2
XLOC_028935	XP_021593844.1protein SRG1-like
XLOC_028999	XP_015885857.1transcription factor HY5
XLOC_029039	PSS26617.1Protein trichome birefringence-like
XLOC_029125	PSS17954.1AP2-associated protein kinase
XLOC_029127	PSS17954.1AP2-associated protein kinase
XLOC_029140	XP_018822875.1 protein CUP-SHAPED COTYLEDON 2-like
XLOC_029183	PSR87838.1Lipid phosphate phosphatase
XLOC_029219	RVX07897.1Peroxidase 42
XLOC_029246	XP_010274324.1 protein RETICULATA-RELATED 1, chloroplastic-like
XLOC_029274	PSS07410.1Dehydration-responsive element-binding protein
XLOC_029324	PSS17862.1DCC family protein
XLOC_029349	---NA---
XLOC_029365	XP_010060485.1 probable serine/threonine-protein kinase abkC
XLOC_029376	PSS15588.1Proteinaceous RNase P 1 like
XLOC_029377	PSS15585.1Plastidic glucose transporter like
XLOC_029430	XP_023884559.1NAC domain-containing protein 90-like
XLOC_029496	XP_010648366.1 probable protein phosphatase 2C 53
XLOC_029511	PSR95557.1Kinetochore protein NDC80
XLOC_029575	XP_004235771.1protein TIFY 6B isoform X1
XLOC_029585	PSS35302.1Squamosa promoter-binding-like protein
XLOC_029617	PSS18101.1Transcription factor WER like
XLOC_029651	PSS04585.1Origin of replication complex subunit like
XLOC_029669	RVW51505.1Filament-like plant protein 4
XLOC_029698	XP_002510484.1probable LRR receptor-like serine/threonine-protein kinase At4g36180
XLOC_029762	---NA---
XLOC_029818	PSS04228.1ABC transporter C family member 10 like
XLOC_029823	PSS11994.1Protein gamma response like
XLOC_029859	XP_010264820.1 probable folate-biopterin transporter 8, chloroplastic isoform X1
XLOC_029926	XP_012478042.1 probable beta-1,3-galactosyltransferase 8
XLOC_029939	PSS36038.1Subtilisin-like protease
XLOC_029961	PSS10275.1Nonribosomal peptide synthetase
XLOC_029990	PSS36628.1Isocitrate dehydrogenase NADP-dependent
XLOC_030088	PSS11167.1U11/U12 small nuclear ribonucleoprotein
XLOC_030094	XP_008219516.1 14 kDa proline-rich protein DC2.15-like
XLOC_030102	XP_008219516.1 14 kDa proline-rich protein DC2.15-like
XLOC_030225	PSR99899.1Transcription initiation factor TFIID subunit 4b like
XLOC_030238	XP_003592935.1WEB family protein At1g75720
XLOC_030244	XP_012451683.1 cyclic phosphodiesterase-like
XLOC_030278	PSS31253.1Calponiny domain-containing protein
XLOC_030310	PSR92922.1Gamma-tubulin complex component like
XLOC_030328	PSR99567.1GDSL esterase/lipase
XLOC_030372	XP_023539143.1peptidyl-prolyl cis-trans isomerase FKBP19, chloroplastic-like isoform X2
XLOC_030384	XP_021280831.1SPX domain-containing protein 3
XLOC_030422	---NA---
XLOC_030666	BAQ19377.1filamentous flower
XLOC_030691	XP_027169107.1omega-hydroxypalmitate O-feruloyl transferase-like
XLOC_030715	PSR86560.1Translation initiation factor IF-2 like
XLOC_030775	PSR86311.1DCTP pyrophosphatase
XLOC_030781	PSS36182.150S ribosomal protein
XLOC_030790	XP_006452562.130S ribosomal protein S10, chloroplastic
XLOC_030815	PSS02053.1Pectinesterase inhibitor domain protein
XLOC_030830	PSR87933.1Ribonuclease III domain-containing protein
XLOC_030837	XP_002285189.1 protein SHOOT GRAVITROPISM 5
XLOC_030839	---NA---
XLOC_030840	XP_002281730.1 serine/threonine-protein kinase BRI1-like 2
XLOC_030861	XP_012068768.1ATPase 10, plasma membrane-type
XLOC_030889	PSS08374.1Kinase-interacting family protein
XLOC_030915	XP_019076057.1 transcription factor MYB59
XLOC_030943	PSS24558.1RING-H2 finger protein
XLOC_030959	PSS06296.1Metal tolerance protein
XLOC_030977	PSS09857.1Gamma-glutamyl phosphate reductase
XLOC_031057	PSR95427.1Protein ETHYLENE INSENSITIVE like
XLOC_031118	PSS34850.1Protein DEK like
XLOC_031132	XP_006365973.1 pentatricopeptide repeat-containing protein At5g66520-like
XLOC_031154	XP_002283883.1 protodermal factor 1
XLOC_031217	PSS19158.1Dehydrodolichyl diphosphate synthase complex subunit like
XLOC_031221	---NA---
XLOC_031285	PSR87955.1LRR receptor-like serine/threonine-protein kinase
XLOC_031316	PSS02791.1Beta carbonic anhydrase
XLOC_031373	PSS13684.1Squamosa promoter-binding-like protein
XLOC_031381	PSS24773.1U-box domain-containing protein
XLOC_031513	XP_022887929.1G-type lectin S-receptor-like serine/threonine-protein kinase RLK1
XLOC_031552	PSS26161.1A-agglutinin anchorage subunit like
XLOC_031633	PSS07517.1U11/U12 small nuclear ribonucleoprotein
XLOC_031660	XP_027084622.1phospholipase D alpha 1-like
XLOC_031718	PSR85082.1Protein RESTRICTED TEV MOVEMENT like
XLOC_031729	PSR84856.1Protein ALTERED XYLOGLUCAN like
XLOC_031751	XP_010263414.1 TMV resistance protein N-like
XLOC_031800	PSS33592.1Leaf rust 10 disease-resistance locus receptor-like protein kinase
XLOC_031807	PSS16174.1Protein DETOXIFICATION like
XLOC_031808	---NA---
XLOC_031852	PSR86075.1Trigger factor like
XLOC_031885	XP_002281568.1 cell division cycle-associated 7-like protein
XLOC_031912	PSS08186.14-coumarate--CoA ligase
XLOC_032021	PSS26109.1Subtilisin-like protease
XLOC_032136	PSS34564.13-ketoacyl-CoA synthase
XLOC_032229	---NA---
XLOC_032365	XP_022878593.1phospholipase A1-Ibeta2, chloroplastic-like
XLOC_032428	PSS16436.1Homeobox-DDT domain protein
XLOC_032484	XP_002278272.1 protease Do-like 5, chloroplastic
XLOC_032498	AGO05995.1bZIP transcription factor family protein 11
XLOC_032536	PSR84807.1Protein terminal ear1 like
XLOC_032558	PSR95202.1Von Willebrand factor, type A protein
XLOC_032626	PSS24805.1Homeobox protein like isoform 1
XLOC_032638	PSR88157.1GMP synthase
XLOC_032652	PSS29279.1QWRF motif-containing protein
XLOC_032677	PSR96756.1Protein PLASTID TRANSCRIPTIONALLY ACTIVE 10 like
XLOC_032687	PSR96757.1Transcription factor SPATULA like
XLOC_032702	ASL69225.1UDP-glucose 6-dehydrogenase family protein 2
XLOC_032710	XP_010657905.1 pentatricopeptide repeat-containing protein At1g14470
XLOC_032713	XP_027113345.1NAC domain-containing protein 35-like
XLOC_032741	PSS02923.14-hydroxy-7-methoxy-3-oxo-3,4-dihydro-2H-1, 4-benzoxazin-2-yl glucoside beta-D-glucosidase
XLOC_032824	KEH23033.1transmembrane protein, putative
XLOC_032858	XP_009772182.1 endonuclease 1
XLOC_032923	PSR87612.1Ferredoxin-thioredoxin reductase catalytic chain like
XLOC_032978	XP_022740721.1protein FD-like
XLOC_033040	XP_006492865.1late embryogenesis abundant protein 46-like
XLOC_033103	XP_019076602.1 probable cadmium/zinc-transporting ATPase HMA1, chloroplastic isoform X2
XLOC_033126	PSS33174.1Monocopper oxidase-like protein
XLOC_033130	PSS11797.1Cell cycle checkpoint protein
XLOC_033169	PSS11990.1Serine--tRNA ligase
XLOC_033309	PSS31164.1Protein CUP-SHAPED COTYLEDON 3 like
XLOC_033336	PSS00010.1Glutaredoxin like
XLOC_033351	GAV68227.1DUF688 domain-containing protein
XLOC_033354	XP_002266518.2 dof zinc finger protein DOF5.7
XLOC_033359	PSS29933.1Chaperone protein dnaJ 11 like
XLOC_033365	PSS16456.1Protein ESKIMO like
XLOC_033386	PSS33232.1Neurofilament medium polypeptide like
XLOC_033435	PSS01329.1Triose-phosphate transporter domain protein
XLOC_033453	PSS11609.1Haloacid dehalogenase-like hydrolase domain-containing protein Sgpp
XLOC_033462	ARU79083.1beta-glucosidase 5 GH3 family
XLOC_033509	PSS10150.1Heavy metal-associated isoprenylated plant protein
XLOC_033544	PSS14622.1Phosphoglycerate mutase
XLOC_033622	PSS17363.1Rho GTPase-activating protein
XLOC_033627	PSS28529.1Inorganic phosphate transporter 2-1 like
XLOC_033629	PSS28529.1Inorganic phosphate transporter 2-1 like
XLOC_033693	PSS04005.1Protein REVEILLE like
XLOC_033765	XP_018857177.1 phenolic glucoside malonyltransferase 1-like
XLOC_033798	XP_010259075.1 protein MARD1
XLOC_033801	PSR92734.1Sigma non-opioid intracellular receptor 1 like
XLOC_033893	PSS11291.1Thioredoxin-like fold protein
XLOC_033896	PSR84638.1TRNA wybutosine-synthesizing protein like
XLOC_033914	---NA---
XLOC_033937	BBC44637.1valerianol synthase
XLOC_033941	XP_018839525.1 chorismate mutase 2-like
XLOC_033964	PSS02654.1DNA double-strand break repair Rad50 ATPase
XLOC_034004	PSR91573.1Osteocalcin 2 like
XLOC_034024	PSS04615.1ACT domain-containing protein
XLOC_034096	PSR99884.1Synaptonemal complex protein
XLOC_034097	EOY16011.1 E3 ubiquitin-protein ligase HUWE1, putative
XLOC_034115	PSR95080.1UDP-glucose iridoid glucosyltransferase
XLOC_034170	PSS04783.1CASP-like protein
XLOC_034203	PSR89671.1NAC domain-containing protein
XLOC_034233	PSS29253.1NADPH oxidase
XLOC_034236	PSR89830.1Receptor-like kinase
XLOC_034241	---NA---
XLOC_034285	PSR86201.1Glucan endo-1,3-beta-glucosidase
XLOC_034353	---NA---
XLOC_034415	XP_022842373.1BAHD acyltransferase DCR-like
XLOC_034426	PSS31356.1DeSI-like protein
XLOC_034494	BAV56712.1 transposase
XLOC_034526	PSR86705.1Serine/threonine-protein kinase
XLOC_034536	PSS15773.1Chaperone protein like
XLOC_034573	XP_027087458.1(+)-neomenthol dehydrogenase-like isoform X1
XLOC_034633	PSS36620.1Butyrate--CoA ligase AAE11, peroxisomal like
XLOC_034661	XP_023880651.1transcription factor AS1
XLOC_034706	XP_022873709.1oleosin 18.2 kDa-like
XLOC_034708	PSR92647.1CASP-like protein
XLOC_034712	PSS19059.1Transcription factor GAMYB like
XLOC_034806	PSS36343.1Lon protease
XLOC_034825	XP_021662828.1protein NRT1/ PTR FAMILY 5.10-like
XLOC_034864	XP_010646869.1 protein FD
XLOC_034892	XP_019152586.1 snakin-1-like
XLOC_034911	---NA---
XLOC_034916	XP_006597275.1 actin
XLOC_034919	OMO63085.1Zinc finger, PHD-type
XLOC_034927	XP_023872327.1uncharacterized protein At3g50808-like
XLOC_034928	XP_023872305.1purine-uracil permease NCS1
XLOC_034941	XP_010261110.1 cytochrome P450 78A7-like
XLOC_034972	PSS24615.1NAC domain-containing protein
XLOC_034978	XP_027104975.1GATA transcription factor 8-like
XLOC_035020	ACI14382.1cinnamoyl-CoA reductase
XLOC_035071	PSR95566.1Altered inheritance of mitochondria protein
XLOC_035074	XP_027103789.1actin-depolymerizing factor 7 isoform X1
XLOC_035217	XP_023906255.1O-acyltransferase WSD1-like
XLOC_035219	PSS33005.1Zinc finger protein
XLOC_035317	EYU22852.1hypothetical protein MIMGU_mgv1a018507mg, partial
XLOC_035349	XP_016745348.1 protein LATERAL ROOT PRIMORDIUM 1-like
XLOC_035358	OMO63958.1Plant specific eukaryotic initiation factor 4B
XLOC_035361	PSR86598.1Aquaporin PIP2-7 like
XLOC_035508	AMQ67305.1self-incompatibility associated ribonuclease
XLOC_035520	---NA---
XLOC_035547	XP_011013147.1 expansin-A1
XLOC_035650	PSS14388.1BOI-related E3 ubiquitin-protein ligase
XLOC_035690	EOY23333.1Sterol regulatory element-binding protein cleavage-activating protein, putative
XLOC_035751	PSS24241.1Phosphatidyl-myo-inositol mannosyltransferase
XLOC_035752	PQP93595.1F-box/kelch-repeat protein
XLOC_035764	PSS01117.1Clathrin assembly protein
XLOC_035847	PSS10302.1Disease resistance protein
XLOC_035936	PSS29368.1Myb family transcription factor EFM like
XLOC_035941	PSS19184.1Armadillo repeat-containing protein
XLOC_035948	PSS36133.1adenylate kinase
XLOC_035979	PSR98497.1Growth-regulating factor like
XLOC_036013	PSS24935.1Heat shock 70 protein
XLOC_036088	XP_011093185.1MADS-box transcription factor 6
XLOC_036194	XP_011069845.1probable E3 ubiquitin-protein ligase XBOS32
XLOC_036244	XP_017225882.1 protein RESTRICTED TEV MOVEMENT 3-like
XLOC_036257	PSS32578.1Factor of DNA methylation like
XLOC_036295	PSR90967.1Leucine-rich repeat receptor-like protein kinase
XLOC_036318	PSS09901.1ABC transporter G family member 20 like
XLOC_036356	OMO78776.1protein PAIR1-like protein
XLOC_036365	XP_012089017.1heavy metal-associated isoprenylated plant protein 35
XLOC_036463	XP_022726978.1transcription factor bHLH84-like
XLOC_036573	XP_011046767.1 proline-rich protein 4
XLOC_036574	XP_011046767.1 proline-rich protein 4
XLOC_036615	PSS03120.1NAC domain-containing protein
XLOC_036621	PSR89835.1Protein FAM210B like
XLOC_036655	PSS07778.1Iron-sulfur cluster assembly protein
XLOC_036670	PSS15800.1Replication factor C subunit like
XLOC_036747	RVW40514.1Remorin 4.1
XLOC_036883	PSS11084.1Zinc transporter like
XLOC_036889	XP_027070439.1cysteine-rich and transmembrane domain-containing protein WIH1
XLOC_036890	XP_022873297.1regulatory protein NPR5-like isoform X1
XLOC_036934	PSS11254.1Protein IQ-DOMAIN like
XLOC_036938	XP_015896339.1beta-carotene isomerase D27, chloroplastic
XLOC_036958	XP_010656246.1 NAC domain-containing protein 8 isoform X3
XLOC_036970	XP_027070849.1cysteine-rich receptor-like protein kinase 10
XLOC_036989	PSS35701.1Protein EMBRYO DEFECTIVE like
XLOC_036991	PSS35702.1Chitinase-like protein
XLOC_037011	PSS17920.1ATP-dependent DNA helicase
XLOC_037050	PSR92681.1Mediator of RNA polymerase II transcription subunit 33A like
XLOC_037052	XP_010650032.1 endo-1,3;1,4-beta-D-glucanase
XLOC_037160	RVW63136.1Retrovirus-related Pol polyprotein from transposon TNT 1-94
XLOC_037179	PIN03377.1Isoamyl acetate-hydrolyzing esterase
XLOC_037195	PSR87600.1WAT1-related protein
XLOC_037211	XP_027081357.1FCS-Like Zinc finger 2-like
XLOC_037216	PSS26935.1TLC domain-containing protein
XLOC_037224	XP_021275384.1L-type lectin-domain containing receptor kinase IX.1-like
XLOC_037318	PSS13851.1SPX domain-containing protein
XLOC_037321	PSR91117.1Transcription factor like
XLOC_037356	PSR87693.1Transcription factor like
XLOC_037360	---NA---
XLOC_037384	XP_010257525.1 AAA-ATPase At4g25835-like
XLOC_037388	ACQ57188.1acyl acyl-carrier-protein thioesterase type B
XLOC_037439	XP_006486413.1ultraviolet-B receptor UVR8 isoform X1
XLOC_037459	PSR85191.1E3 ubiquitin-protein ligase RHA4A
XLOC_037477	PSS00095.1Glucuronoxylan glucuronosyltransferase F8H
XLOC_037492	AYP70923.1beta-galactosidase 3
XLOC_037516	PSR92796.1GDSL esterase/lipase
XLOC_037572	---NA---
XLOC_037591	XP_023929688.1protein RICE SALT SENSITIVE 3
XLOC_037592	XP_021682400.1probable membrane-associated kinase regulator 3
XLOC_037599	XP_022847826.1peroxidase 27-like
XLOC_037656	XP_006655257.1 agamous-like MADS-box protein AGL62
XLOC_037700	XP_023903249.1kinesin-like protein KIN-14L
XLOC_037744	XP_010095299.1transcription factor MYB12
XLOC_037758	PSS36098.1Chitinase-like protein
XLOC_037778	---NA---
XLOC_037786	PSR92530.1Neuralized-like protein
XLOC_037843	---NA---
XLOC_037846	PSS00175.1GDSL esterase/lipase
XLOC_037869	PSR98497.1Growth-regulating factor like
XLOC_037951	PSS31671.1Glutaredoxin like
XLOC_037970	XP_022719259.1glucan endo-1,3-beta-glucosidase 8-like
XLOC_038001	PSS35765.1Protein disulfide-isomerase
XLOC_038020	PSS04328.1ABC transporter permease protein YtcP
XLOC_038032	XP_023878449.1alpha-1,4 glucan phosphorylase L-2 isozyme, chloroplastic/amyloplastic-like isoform X1
XLOC_038135	XP_004138418.2 transcription factor bHLH51
XLOC_038240	XP_016501058.1 5'-nucleotidase SurE-like
XLOC_038262	PSR98199.1Pentatricopeptide repeat-containing protein
XLOC_038369	PSS00373.1Glutamate receptor 3.6 like
XLOC_038431	XP_023904167.122.7 kDa class IV heat shock protein-like
XLOC_038451	XP_002278211.1 trans-resveratrol di-O-methyltransferase
XLOC_038466	PHT66912.1Serine--glyoxylate aminotransferase
XLOC_038506	RVX18585.1Polygalacturonase 1 beta-like protein 3
XLOC_038529	XP_027073151.1protein RKD5-like
XLOC_038631	XP_027153465.1uncharacterized membrane protein At3g27390-like isoform X1
XLOC_038639	PSR99512.1Niemann-Pick C1 protein
XLOC_038643	PSR99517.11,4-alpha-glucan-branching enzyme like
XLOC_038646	RVX16072.1Catalase isozyme 1
XLOC_038686	PSS02584.1MADS-box transcription factor
XLOC_038703	PSS06154.1Thiamine thiazole synthase
XLOC_038710	XP_018854132.1 thiamine thiazole synthase, chloroplastic-like
XLOC_038713	EOY12580.1Potassium/sodium hyperpolarization-activated cyclic nucleotide-gated channel 1
XLOC_038862	XP_010260051.1 receptor-like protein kinase THESEUS 1
XLOC_038867	PSR94687.1Transmembrane protein like
XLOC_038911	KZV45179.1chlorophyll a-b binding protein 4, chloroplastic
XLOC_038917	PSS31426.1Methyltransferase PMT5
XLOC_038961	XP_006477977.1peptide methionine sulfoxide reductase B1, chloroplastic-like
XLOC_038967	PSR90018.1Receptor-like protein kinase HERK
XLOC_038974	PSS15989.1Protein LIGHT-DEPENDENT SHORT HYPOCOTYLS like
XLOC_039058	XP_010240943.1 protein YLS9
XLOC_039080	XP_027160651.1probable receptor-like protein kinase At2g42960 isoform X2
XLOC_039096	XP_024456548.1G-type lectin S-receptor-like serine/threonine-protein kinase B120
XLOC_039101	XP_027121361.1isoaspartyl peptidase/L-asparaginase 1-like
XLOC_039113	XP_023927894.1methanol O-anthraniloyltransferase-like
XLOC_039114	PSR91335.1E3 ubiquitin-protein like
XLOC_039131	PSS32683.1UPF0481 protein
XLOC_039135	PSS32683.1UPF0481 protein
XLOC_039250	PSR91075.1Sulfate transporter 3.3 like
XLOC_039268	---NA---
XLOC_039318	PSR94731.1COBRA-like protein
XLOC_039444	PSR98464.1Alpha carbonic anhydrase
XLOC_039446	PSS05777.1B-box zinc finger protein
XLOC_039485	PSS04977.1Hippocampus abundant transcript-like protein
XLOC_039531	XP_002285141.1 peamaclein
XLOC_039595	ONL94081.1Retrovirus-related Pol polyprotein LINE-1
XLOC_039640	ACR09748.1DIV3B protein
XLOC_039740	XP_018825162.1 heme-binding protein 2-like
XLOC_039750	---NA---
XLOC_039805	PSS14642.1Protein ALEX like
XLOC_039812	XP_021278294.1protein FANTASTIC FOUR 1
XLOC_039815	PSR95404.1Transcription factor like
XLOC_039840	PSS11065.1Leucine-rich repeat receptor-like serine/threonine-protein kinase
XLOC_039845	XP_017215780.1 zinc finger RNA-binding protein 2-like
XLOC_039848	XP_002285328.1 axial regulator YABBY 5
XLOC_039880	PSS28529.1Inorganic phosphate transporter 2-1 like
XLOC_039887	XP_002281453.1 U-box domain-containing protein 25
XLOC_039908	PSS17309.1Mixed-linked glucan synthase
XLOC_039941	PSS14624.1Melanoma inhibitory activity protein
XLOC_039954	PSS12105.1WD-40 repeat-containing protein
XLOC_039988	PSS24020.1Purple acid phosphatase
XLOC_039997	---NA---
XLOC_039999	PSR85082.1Protein RESTRICTED TEV MOVEMENT like
XLOC_040000	PSR85082.1Protein RESTRICTED TEV MOVEMENT like
XLOC_040015	PSS26030.1F-box protein
XLOC_040021	PSR85259.1Aluminum-activated malate transporter like
XLOC_040048	PSR93193.1Proline and serine-rich protein
XLOC_040097	PON55103.1Transmembrane protein
XLOC_040127	PON61901.1B-box-type zinc finger
XLOC_040133	RVX06861.1Double-stranded RNA-binding protein 5
XLOC_040161	PSS30610.1E3 ubiquitin-protein like
XLOC_040165	PSR87842.1S-adenosylmethionine-dependent methyltransferase
XLOC_040232	XP_018810581.1 indole-3-acetate O-methyltransferase 1-like
XLOC_040237	PSR84507.1SPX domain-containing protein
XLOC_040289	PSS10429.1CASP-like protein
XLOC_040314	PSS11493.1Protein STRUBBELIG-RECEPTOR FAMILY 8 like
XLOC_040395	PSS15852.1Nuclear transcription factor Y subunit A-10 like
XLOC_040398	PSS24401.1RING-H2 finger protein
XLOC_040539	XP_021607060.1NAC domain-containing protein 92 isoform X1
XLOC_040644	PSS31557.1E3 ubiquitin-protein ligase XBOS31
XLOC_040687	XP_010242709.1 stearoyl-[acyl-carrier-protein] 9-desaturase, chloroplastic
XLOC_040737	XP_012828819.1 rac-like GTP-binding protein RHO1
XLOC_040847	PSS34968.1Protein EMBRYO DEFECTIVE like
XLOC_040892	PSS06233.1Ubiquitin carboxyl-terminal hydrolase
XLOC_040905	PSR95211.1P-loop NTPase domain-containing protein
XLOC_041035	RVX11064.1Retrovirus-related Pol polyprotein from transposon RE1
XLOC_041088	PSS16239.1Zinc finger protein like
XLOC_041188	XP_019081976.1 protein MIS12 homolog
XLOC_041265	XP_006452112.1transcription factor bHLH123 isoform X1
XLOC_041332	XP_002285679.1 probable DNA primase large subunit
XLOC_041334	---NA---
XLOC_041341	OMO76823.1Glycoside hydrolase, family 17
XLOC_041344	XP_018624405.1 glucan endo-1,3-beta-glucosidase 1 isoform X2
XLOC_041348	PSS14206.1Cell division control protein 6 B like
XLOC_041350	KVI11893.1Tetratricopeptide-like helical
XLOC_041362	XP_002266691.1 cytochrome P450 724B1 isoform X2
XLOC_041393	XP_024459211.1DNA repair protein RAD51 homolog
XLOC_041476	PSS06131.1CASP-like protein
XLOC_041596	PSS13813.1Myb family transcription factor
XLOC_041627	EOY08839.1PQ-loop repeat family protein / transmembrane family protein, putative isoform 1
XLOC_041695	OVA16210.1Calponin homology domain
XLOC_041709	PSS13776.1Kinesin-like protein
XLOC_041746	ADR74193.1 (E)-beta-caryophyllene synthase
XLOC_041783	PSR86824.1Protein DETOXIFICATION like
XLOC_041845	XP_022737020.1transcription factor bHLH162-like
XLOC_041881	PSS19002.1TMV resistance protein like
XLOC_041883	RVW48680.1IRK-interacting protein
XLOC_041887	RVW48680.1IRK-interacting protein
XLOC_041947	PSR98241.1Protein LONGIFOLIA like
XLOC_041965	---NA---
XLOC_042016	AAL87103.11-ascorbate oxidase
XLOC_042050	PSS26858.1Equilibrative nucleotide transporter like
XLOC_042064	XP_002271355.3 growth-regulating factor 4 isoform X2
XLOC_042075	PSR89843.1hypothetical protein CEY00_Acc30036
XLOC_042077	PSR89843.1hypothetical protein CEY00_Acc30036
XLOC_042101	PON65281.1Heavy metal-associated domain containing protein
XLOC_042124	PSS17641.1Pentatricopeptide repeat-containing protein
XLOC_042135	PSR90122.1Dehydrosqualene desaturase
XLOC_042167	PSR91574.1Adenine phosphoribosyltransferase
XLOC_042168	---NA---
XLOC_042171	PSR89275.1Protein LOW PSII ACCUMULATION 3 like
XLOC_042199	PSR85399.1Protein TIC 20-v like
XLOC_042209	PSS28693.1Hydroxyproline O-galactosyltransferase
XLOC_042217	PSS24829.1Ankyrin repeat domain-containing protein
XLOC_042225	PSR95191.1Protein HEG 1 like
XLOC_042235	EEF50354.1 oxidoreductase, putative
XLOC_042254	XP_002280453.2 putative ABC transporter B family member 8
XLOC_042259	PSS08234.1Protein EXORDIUM-like
XLOC_042283	PSS17647.1HVA22-like protein
XLOC_042309	ARQ20743.1chloroplastic glycerol-3-phosphate acyltransferase 6
XLOC_042326	PSR89582.1Candidapepsin-7 like
XLOC_042399	PSS24668.1hypothetical protein CEY00_Acc09584
XLOC_042532	AKP06508.1gibberellin 20 oxidase 1
XLOC_042558	XP_024996863.1transketolase, chloroplastic-like
XLOC_042592	PSR86182.1UPF0503 protein
XLOC_042603	PSR86884.1Dirigent protein
XLOC_042718	---NA---
XLOC_042740	XP_023879927.1purple acid phosphatase 3-like
XLOC_042793	PSS33851.1Type IV inositol polyphosphate 5-phosphatase
XLOC_042872	PSR98666.1Cell wall integrity and stress response component 4 like
XLOC_042882	XP_011086180.1cytochrome P450 77A3-like
XLOC_042884	PSS26079.1Cell division cycle-associated 7-like protein
XLOC_042957	PSS16178.1Protein SPA1-RELATED like
XLOC_042982	PSS00411.1Filament-like plant protein
XLOC_043015	PSR88044.1Scarecrow-like protein
XLOC_043026	XP_022749789.1DNA mismatch repair protein MSH7-like isoform X1
XLOC_043035	PSS00149.17-deoxyloganetin glucosyltransferase
XLOC_043078	XP_010258178.1PREDICTED: uncharacterized protein LOC104598014
XLOC_043113	AOR05815.1pectinesterase 1
XLOC_043132	PSS28535.1Beta-1,4-mannosyl-glycoprotein like
XLOC_043136	XP_016547488.1 GDSL esterase/lipase At5g14450-like
XLOC_043164	PSR89602.1Phosphatidylinositol 3-kinase
XLOC_043169	RVX21041.1Aspartic proteinase-like protein 1
XLOC_043189	PSR92581.1Osteocalcin 2 like
XLOC_043241	XP_002279024.1 probable WRKY transcription factor 13 isoform X1
XLOC_043280	PSR85082.1Protein RESTRICTED TEV MOVEMENT like
XLOC_043282	PSR85082.1Protein RESTRICTED TEV MOVEMENT like
XLOC_043300	XP_021830440.1exonuclease V, chloroplastic
XLOC_043302	PSR94693.1Phytoene synthase
XLOC_043395	PSS24465.1Protein DETOXIFICATION like
XLOC_043397	PSR91773.1NADP-dependent malic enzyme like
XLOC_043404	PSR91280.1Protein SAWADEE HOMEODOMAIN like
XLOC_043509	PIN23453.1putative dehydrogenase
XLOC_043561	PSS01616.1Latrophilin Cirl like
XLOC_043655	PSS18996.1Leucine-rich repeat receptor-like protein kinase precursor
XLOC_043682	PON85279.1Adenine/guanine permease AZG
XLOC_043693	OMO49336.1Pathogenic type III effector avirulence factor Avr cleavage site
XLOC_043716	XP_014501005.1ATP-dependent zinc metalloprotease FTSH 8, chloroplastic
XLOC_043726	PSS02636.1Nucleobase-ascorbate transporter like
XLOC_043784	GAV77186.1Tryp_alpha_amyl domain-containing protein
XLOC_043798	PSS24061.1Protein TonB like
XLOC_043800	PSS35830.1Protein SHORT-ROOT like
XLOC_043935	XP_009378513.1 3-ketoacyl-CoA synthase 4-like
XLOC_043956	PSS31334.1Zinc-finger homeodomain protein
XLOC_044002	RVX08753.1putative RING-H2 finger protein ATL49
XLOC_044184	PSS04956.1Cationic amino acid transporter like
XLOC_044230	PSS14459.1GPI-anchored protein
XLOC_044331	XP_023876495.1protein CHLORORESPIRATORY REDUCTION 6, chloroplastic
XLOC_044332	PSS33167.1Cryptochrome DASH like
XLOC_044469	RVW52795.1Serine/threonine-protein kinase AtPK2/AtPK19
XLOC_044502	XP_022858600.1probable pectinesterase 29
XLOC_044554	PSS19209.1Protein IRX15-LIKE like
XLOC_044691	---NA---
XLOC_044694	---NA---
XLOC_044712	---NA---
XLOC_044831	XP_018824334.1 granule-bound starch synthase 1, chloroplastic/amyloplastic-like isoform X1
XLOC_044848	PSS13486.1Ubiquitin carboxyl-terminal hydrolase 4
XLOC_045083	AVZ45861.19-cis-epoxycarotenoid dioxygenase 4
XLOC_045178	PSS34937.1Hydroxyacylglutathione hydrolase
XLOC_045182	PSR93303.1WD repeat-containing protein
XLOC_045266	PSS19549.1Biotin carboxylase
XLOC_045278	PSR86500.1Alcohol-forming fatty acyl-CoA reductase
XLOC_045288	XP_009617948.1 cellulose synthase-like protein G2
XLOC_045289	PSS15964.1DUF724 domain-containing protein
XLOC_045298	---NA---
XLOC_045331	---NA---
XLOC_045356	PSS15798.1Cation/calcium exchanger like
XLOC_045358	CAA58110.1jasmonate induced protein
XLOC_045410	PSS19866.1Neurotrophin receptor-interacting factor like
XLOC_045431	PSS21215.1GTP-binding protein
XLOC_045449	PSS00468.1Protein EARLY-RESPONSIVE TO DEHYDRATION 7 like
XLOC_045480	---NA---
XLOC_045489	XP_010646711.1 transcription factor bHLH112 isoform X2
XLOC_045632	GAV69965.1Myb_DNA-binding domain-containing protein
XLOC_045686	XP_024973293.1B3 domain-containing protein Os06g0194400-like
XLOC_045721	XP_021292424.1CLAVATA3/ESR (CLE)-related protein 13-like
XLOC_045724	XP_006445158.1vacuolar protein 8
XLOC_045769	PSS30210.1Germin-like protein 2-1 precursor
XLOC_045784	PSS24470.1Zinc finger protein
XLOC_045804	PSR87893.1Transcription factor LHW like
XLOC_045921	XP_011092582.1cytochrome P450 86A8-like
XLOC_046013	PQQ14990.1B-box zinc finger protein 19-like
XLOC_046033	XP_022885184.1cyclic dof factor 1-like
XLOC_046054	---NA---
XLOC_046137	PSS03125.1Kelch repeat and BTB domain-containing protein
XLOC_046138	PSR86452.15'-3' exoribonuclease
XLOC_046144	---NA---
XLOC_046152	PSR86510.1Stress-response A/B barrel domain-containing protein
XLOC_046192	PSS20788.1WD repeat-containing protein
XLOC_046200	OVA15012.1zinc finger protein
XLOC_046231	PSR98331.1AT-hook motif nuclear-localized protein
XLOC_046257	PSS20972.1Protein ENHANCED DISEASE RESISTANCE like
XLOC_046278	PSS34796.1Protein PIN-LIKES like
XLOC_046317	PSS30176.1Cystinosin like
XLOC_046409	PSS01169.1PsbP domain-containing protein
XLOC_046485	AKN10569.1iron superoxide dismutase 3
XLOC_046492	PSR86396.1Receptor-like serine/threonine-protein kinase
XLOC_046576	XP_022772564.1zinc finger protein ZAT9-like
XLOC_046629	AGV54425.1 dof zinc finger protein DOF2.1-like protein
XLOC_046631	PSR89883.1RAB6-interacting golgin like
XLOC_046697	PSS10436.1Microtubule-associated protein like
XLOC_046860	---NA---
XLOC_046948	PSS32811.1Protein IQ-DOMAIN like
XLOC_046949	PSS35736.1Protein FAM9A like
XLOC_046962	PSR85162.1Vesicle-associated protein 2-2, N-terminally processed like
XLOC_046971	PSS29136.1Serine/threonine-protein kinase-like protein
XLOC_047012	XP_002285625.1 enoyl-[acyl-carrier-protein] reductase [NADH], chloroplastic
XLOC_047028	PSS15730.1Vacuolar amino acid transporter like
XLOC_047146	PSS17319.1Amino acid permease
XLOC_047156	XP_021613711.1calcium-transporting ATPase 12, plasma membrane-type
XLOC_047167	XP_027061696.1probable amino acid permease 7 isoform X2
XLOC_047176	PKA63925.1Retrovirus-related Pol polyprotein from transposon TNT 1-94
XLOC_047184	PSR91530.1PGR5-like protein
XLOC_047267	PSS28574.130S ribosomal protein
XLOC_047269	XP_021652403.1ABC transporter C family member 10
XLOC_047311	XP_002278211.1 trans-resveratrol di-O-methyltransferase
XLOC_047386	XP_011098787.1glycerol-3-phosphate dehydrogenase [NAD(+)]
XLOC_047396	PSS26368.1SPX domain-containing protein
XLOC_047437	PSR86390.1Protein LONGIFOLIA like
XLOC_047446	XP_021642239.1desiccation-related protein At2g46140 isoform X1
XLOC_047490	XP_017648973.1 stearoyl-[acyl-carrier-protein] 9-desaturase, chloroplastic
XLOC_047531	PSS04672.1Acyl-CoA--sterol O-acyltransferase
XLOC_047602	AGG39692.1ERF transcription factor ERF1
XLOC_047625	XP_015886778.170 kDa peptidyl-prolyl isomerase-like isoform X1
XLOC_047647	XP_021609576.1ACT domain-containing protein ACR6
XLOC_047675	PSR89961.1Auxin response factor like
XLOC_047734	XP_010267094.1 ATP-dependent 6-phosphofructokinase 3-like isoform X1
XLOC_047758	PSS00353.1Subtilisin-like protease
XLOC_047832	XP_027094688.1transcription factor RAX3-like
XLOC_047876	PSS33125.1CDGSH iron-sulfur domain-containing protein
XLOC_047921	XP_027115635.1ARM REPEAT PROTEIN INTERACTING WITH ABF2-like isoform X1
XLOC_047987	XP_027096802.1binding partner of ACD11 1-like isoform X2
XLOC_048149	ACV60359.1putative glucose-6-phosphate/phosphate translocator
XLOC_048151	PSS05991.1Glutamate receptor 3.4 like
XLOC_048152	PSS21254.1Cytochrome P450 81E8 like
XLOC_048155	XP_004243837.1septum-promoting GTP-binding protein 1
XLOC_048159	PSS06062.1Stachyose synthase
XLOC_048190	PSS04958.1Galactan beta-1,4-galactosyltransferase
XLOC_048212	PSS16279.1DNA polymerase I A like
XLOC_048222	XP_010093007.1zinc finger protein CONSTANS-LIKE 2
XLOC_048224	PSR84522.1Histone acetyltransferase
XLOC_048262	XP_016500774.1 proline-rich receptor-like protein kinase PERK8 isoform X1
XLOC_048313	PSS35846.1B-box zinc finger protein

## Sheet: GROUP D
160 elements ARS 7 specific rooting D
XLOC_000599	PSR99991.1Ethylene-responsive transcription factor RAP2-4 like
XLOC_000718	PSS10079.1Protein NRT1/ PTR FAMILY 7.3 like
XLOC_001295	XP_021670613.1probable glutathione S-transferase
XLOC_001446	---NA---
XLOC_002061	PSS31535.1Phosphoenolpyruvate carboxykinase
XLOC_002193	AFU25705.1gag-pol precursor
XLOC_002297	XP_023887714.1GDSL esterase/lipase 1-like
XLOC_002368	GAV85914.1DUF1005 domain-containing protein
XLOC_002882	XP_023872335.1UDP-glycosyltransferase 73C6-like
XLOC_002983	PSS28612.1ACT domain-containing protein
XLOC_003493	NP_001238525.1OS3-like protein
XLOC_003535	XP_021631260.1root meristem growth factor 9-like
XLOC_003804	PSS18163.1Glutamine--fructose-6-phosphate aminotransferase
XLOC_003911	XP_002268559.2 probable acyl-activating enzyme 1, peroxisomal
XLOC_003915	XP_002268559.2 probable acyl-activating enzyme 1, peroxisomal
XLOC_004070	---NA---
XLOC_004769	PON68032.1WRKY domain containing protein
XLOC_004997	XP_010663618.1 LEAF RUST 10 DISEASE-RESISTANCE LOCUS RECEPTOR-LIKE PROTEIN KINASE-like 2.7
XLOC_005227	PSR86470.1NAC domain-containing protein
XLOC_005592	---NA---
XLOC_005602	---NA---
XLOC_005733	XP_017257470.1 dirigent protein 1-like
XLOC_005734	XP_017257470.1 dirigent protein 1-like
XLOC_006179	XP_010659811.2 peroxidase 5
XLOC_006437	PSS28695.1Glutathione S-transferase
XLOC_007008	ARU79071.1beta-glucosidase 3 GH1 family
XLOC_007065	PSS24246.1Forkhead-associated domain-containing protein
XLOC_007411	XP_002283921.3 isoflavone reductase-like protein
XLOC_008140	XP_004485941.1pyridoxal 5'-phosphate synthase subunit PDX1.3
XLOC_008330	XP_002284345.1 BTB/POZ domain-containing protein NPY4 isoform X1
XLOC_008382	XP_018826772.1 protein SRG1-like
XLOC_008611	XP_021618466.1WRKY transcription factor 22
XLOC_009035	PSS24424.1Scarecrow-like protein
XLOC_009388	PSS36386.1Transcription factor bHLH35 like
XLOC_009774	PSS29031.1LRR receptor-like serine/threonine-protein kinase
XLOC_010406	XP_019237100.1 17.3 kDa class II heat shock protein-like
XLOC_010588	XP_019159802.1 exocyst complex component EXO70B1
XLOC_011028	ALO19893.1UDP-glycosyltransferase 75L13
XLOC_011339	PSR89730.1Auxin-responsive protein
XLOC_011718	XP_022731046.1AAA-ATPase At5g57480-like isoform X1
XLOC_011913	XP_002284252.1 probable protein S-acyltransferase 7 isoform X1
XLOC_011980	PSS01640.1Calcium-dependent protein kinase
XLOC_012272	PSR92838.1Cytokinin riboside 5'-monophosphate phosphoribohydrolase
XLOC_012297	PSS30726.1Dammarenediol 12-hydroxylase
XLOC_012677	XP_021685698.1protein C2-DOMAIN ABA-RELATED 4-like
XLOC_012923	XP_012069596.1sugar transport protein 13
XLOC_013343	PSS24598.1E3 ubiquitin-protein like
XLOC_013509	PSS34641.1GDSL esterase/lipase
XLOC_013544	---NA---
XLOC_013881	XP_012848738.1 probable LRR receptor-like serine/threonine-protein kinase RFK1 isoform X1
XLOC_014415	XP_024456548.1G-type lectin S-receptor-like serine/threonine-protein kinase B120
XLOC_014828	---NA---
XLOC_014993	BAB89348.11-aminocyclopropane-1-carboxylate synthase
XLOC_015103	XP_018844047.1 crocetin glucosyltransferase, chloroplastic-like
XLOC_015401	PSS17811.1Myosin-M heavy chain like
XLOC_016252	PSS06338.1Auxin-induced protein like
XLOC_016255	PSS06338.1Auxin-induced protein like
XLOC_016889	PSS07283.1senescence-associated gene 21 like protein
XLOC_017620	XP_016578874.1 bifunctional epoxide hydrolase 2-like
XLOC_017671	PSR85212.1Protein SMAX1-LIKE like
XLOC_017691	PSS04089.1Homeodomain-interacting protein kinase
XLOC_017879	RVX23377.1putative WRKY transcription factor 7
XLOC_018185	ARU79077.1beta-glucosidase 9 GH1 family
XLOC_018444	PSS26857.1Receptor-like protein kinase precursor
XLOC_018692	ADD10719.1acetyl-CoA C-acetyltransferase protein
XLOC_018831	AZL56934.1auxin-responsive protein
XLOC_019108	PSS36032.1LOB domain-containing protein
XLOC_019143	XP_016483784.1 heavy metal-associated isoprenylated plant protein 3-like
XLOC_020249	---NA---
XLOC_020411	PSS23947.1Purple acid phosphatase
XLOC_020523	XP_027355023.1actin-depolymerizing factor 5 isoform X1
XLOC_020551	EOY06046.1Glutathione S-transferase tau 7
XLOC_020729	XP_024456548.1G-type lectin S-receptor-like serine/threonine-protein kinase B120
XLOC_020934	AYA60132.1GABA transporter 2
XLOC_020936	PON42168.143kDa postsynaptic protein
XLOC_021170	XP_021608465.1probable glutathione S-transferase
XLOC_021336	---NA---
XLOC_022067	PSR98492.1PAN domain-containing protein
XLOC_023207	XP_022750614.1AAA-ATPase ASD, mitochondrial-like
XLOC_023832	PSS30774.1Salicylic acid-binding protein like
XLOC_023846	PSR92868.1Glutathione S-transferase
XLOC_023875	PSR89091.1GEM-like protein
XLOC_024144	---NA---
XLOC_024286	PSS34418.1Cytochrome c biosynthesis protein
XLOC_024436	---NA---
XLOC_024470	PSS16221.1Nucleoporin like
XLOC_024526	---NA---
XLOC_024940	PSS08438.1Lamin tail domain-containing protein
XLOC_025103	XP_027182876.1protein Brevis radix-like 1 isoform X1
XLOC_025662	---NA---
XLOC_025664	PSS31535.1Phosphoenolpyruvate carboxykinase
XLOC_025837	---NA---
XLOC_026018	OMP02348.1DNA-binding WRKY
XLOC_026034	PSR89523.1Lipid-phosphate phosphatase
XLOC_027415	GAV82911.1VWA domain-containing protein/zf-RING_2 domain-containing protein
XLOC_027532	XP_002266330.2 pantoate--beta-alanine ligase
XLOC_029405	BBA18085.112-oxophytodienoic acid reductase 1
XLOC_029820	ASJ80913.1gibberellin 2-oxidase 1
XLOC_030206	XP_021284667.1transcription factor bHLH93-like
XLOC_030368	---NA---
XLOC_031018	PSS01828.1Transcription factor bHLH130 like
XLOC_031151	XP_023877718.1xyloglucan endotransglucosylase/hydrolase 2-like
XLOC_031284	EEF33269.1aldo/keto reductase, putative
XLOC_031332	XP_015872869.1uncharacterized protein LOC107409966
XLOC_032281	PSR98209.1Glutathione S-transferase
XLOC_032441	RWR94899.1ataxia telangiectasia mutated family protein
XLOC_032504	ALO19894.1UDP-glycosyltransferase 75L14
XLOC_032505	ALO19893.1UDP-glycosyltransferase 75L13
XLOC_032617	XP_019430534.1 probable pyridoxal 5'-phosphate synthase subunit PDX1
XLOC_032767	PSS32562.17-deoxyloganetic acid glucosyltransferase
XLOC_033132	PSR92870.1Myb-related protein like
XLOC_033287	KHG07987.1High affinity sulfate transporter 2
XLOC_033597	PSS30382.1Histone-lysine N-methyltransferase, H3 lysine-79 specific like
XLOC_034092	---NA---
XLOC_034670	PSS16459.1Transcription factor bHLH30 like
XLOC_035098	PSR91087.1U-box domain-containing protein
XLOC_035350	PSR90142.1DNA-directed RNA polymerase
XLOC_035561	XP_002284133.1 auxin-responsive protein IAA14
XLOC_035613	ARU79077.1beta-glucosidase 9 GH1 family
XLOC_035806	PSS26903.1BTB/POZ domain-containing protein
XLOC_035807	PSS26903.1BTB/POZ domain-containing protein
XLOC_035808	PSS26903.1BTB/POZ domain-containing protein
XLOC_035994	PSS09809.1LRR receptor-like serine/threonine-protein kinase
XLOC_036265	XP_021686393.11-aminocyclopropane-1-carboxylate oxidase homolog 1-like isoform X1
XLOC_036588	OIT32621.1protein nrt1 ptr family 5.2
XLOC_037822	PSS33761.1Glutathione S-transferase
XLOC_037915	---NA---
XLOC_038636	PSS30175.1UPF0711 protein like
XLOC_038814	PSS04154.1Salutaridine reductase
XLOC_039326	PSS33261.1Adenine/guanine permease
XLOC_039454	PSR89091.1GEM-like protein
XLOC_039747	XP_021612584.1calmodulin-like protein 8 isoform X1
XLOC_040700	XP_002279966.2 common plant regulatory factor 1 isoform X1
XLOC_040775	PSS28653.1Tetratricopeptide repeat protein like
XLOC_040976	PSS36606.1Protein phosphatase
XLOC_041368	XP_018844047.1 crocetin glucosyltransferase, chloroplastic-like
XLOC_042117	XP_027095390.1cytochrome P450 94A1-like
XLOC_042120	XP_027095390.1cytochrome P450 94A1-like
XLOC_042328	XP_006378334.1probable glutathione S-transferase
XLOC_042796	PSS33856.1Acyl-CoA N-acyltransferase protein
XLOC_043775	PSS12033.1Auxin-responsive protein
XLOC_044282	XP_013447106.1heavy metal-associated isoprenylated plant protein 39
XLOC_044391	ACI22425.1pericarp peroxidase 3
XLOC_044441	EOY15857.1 Poly polymerase 1, putative
XLOC_044442	XP_021284863.1protein MIZU-KUSSEI 1-like
XLOC_044574	PSS15484.1Protein Brevis radix-like
XLOC_044597	PSS20988.1WRKY transcription factor
XLOC_044732	PSR89523.1Lipid-phosphate phosphatase
XLOC_045268	PSR99997.1Glucan 1,3-beta-glucosidase like
XLOC_045793	PSR94833.1Auxin-induced protein like
XLOC_045847	XP_002325976.1proteinase inhibitor type-2
XLOC_045884	XP_019075240.1PREDICTED: uncharacterized protein LOC100259457 isoform X2
XLOC_045976	---NA---
XLOC_046269	PNX61398.1ribonuclease H
XLOC_046526	PSS32735.1Aspartate aminotransferase
XLOC_047482	PSS32645.1Glutathione S-transferase
XLOC_047543	ABB89014.1CXE carboxylesterase
XLOC_047560	XP_015898009.1probable auxin efflux carrier component 1b
XLOC_047764	---NA---
XLOC_047867	XP_015896868.1abscisic acid receptor PYR1-like

## Sheet: GROUP E
1384 elements ARS 7 specific rooting E
XLOC_000003	RHN43924.1 putative Transposase-associated domain-containing protein
XLOC_000005	XP_018859967.1PREDICTED: uncharacterized protein LOC109021722
XLOC_000054	---NA---
XLOC_000069	---NA---
XLOC_000080	RVW85211.1Copia protein
XLOC_000084	PSR96489.1Gamma aminobutyrate transaminase
XLOC_000183	PSS08155.1Leucine-rich repeat receptor-like protein kinase
XLOC_000184	PSS13921.1Dicer-like protein
XLOC_000231	---NA---
XLOC_000239	PSS01797.1ABC transporter A family member 1 like
XLOC_000243	RVW60234.1Transposon Tf2-12 polyprotein
XLOC_000259	---NA---
XLOC_000267	---NA---
XLOC_000336	PNY13361.1putative retrotransposon Ty1-copia subclass protein
XLOC_000367	RVW76592.1Retrovirus-related Pol polyprotein from transposon TNT 1-94
XLOC_000393	---NA---
XLOC_000396	---NA---
XLOC_000420	PSS19728.1F-box protein
XLOC_000426	PSS19728.1F-box protein
XLOC_000549	XP_027192123.1microtubule-associated protein 70-5-like
XLOC_000567	XP_010102263.1GRF1-interacting factor 1
XLOC_000598	XP_020548543.1uncharacterized WD repeat-containing protein C2A9.03 isoform X2
XLOC_000648	PSS21661.1Glutathione S-transferase zeta class like
XLOC_000727	AEW24433.1ubiquitin-conjugating enzyme E2
XLOC_000729	PSS23885.1Mannan endo-1,4-beta-mannosidase
XLOC_000732	XP_022874138.1vacuolar-sorting receptor 1-like isoform X2
XLOC_000734	XP_012069247.1ubiquitin-conjugating enzyme E2-17 kDa
XLOC_000749	PSS24300.1Transcription factor GLABRA like
XLOC_000761	---NA---
XLOC_000802	XP_027360731.1transcription factor MYB124-like
XLOC_000844	XP_022851118.1intracellular protein transport protein USO1-like
XLOC_000861	XP_015967725.1protein EXECUTER 2, chloroplastic
XLOC_000933	OVA18969.1Phosphoenolpyruvate carboxykinase
XLOC_000986	PSR93353.1Pentatricopeptide repeat-containing protein
XLOC_001023	XP_011047056.1 TATA-binding protein-associated factor BTAF1 isoform X1
XLOC_001029	XP_011013494.1 disease resistance RPP13-like protein 4
XLOC_001075	---NA---
XLOC_001077	---NA---
XLOC_001105	---NA---
XLOC_001107	RVW73890.1Retrovirus-related Pol polyprotein from transposon TNT 1-94
XLOC_001134	PSS24865.1Trihelix transcription factor
XLOC_001152	PSS33624.1E3 ubiquitin-protein ligase RING1-like
XLOC_001170	KYP56875.1Retrovirus-related Pol polyprotein LINE-1
XLOC_001189	ABZ05022.1delta-12 fatty acid desaturase
XLOC_001218	XP_004245632.1thaumatin-like protein
XLOC_001235	PSS01845.1Vacuolar protein sorting-associated protein like
XLOC_001236	---NA---
XLOC_001242	PSS21544.1Pentatricopeptide repeat-containing protein
XLOC_001282	XP_018835529.1 endochitinase-like
XLOC_001285	AOQ25971.1latex chitinase protein
XLOC_001330	---NA---
XLOC_001331	---NA---
XLOC_001332	PSS19510.1Caffeic acid 3-O-methyltransferase
XLOC_001348	XP_027114916.1ATP-citrate synthase alpha chain protein 2-like
XLOC_001378	XP_006350528.1 putative aminoacrylate hydrolase RutD
XLOC_001397	XP_002265257.1 UDP-glycosyltransferase 73D1
XLOC_001399	PIN14744.1UDP-glucuronosyl and UDP-glucosyl transferase
XLOC_001487	PSS28592.1DnaJ subfamily B member like
XLOC_001556	PSR90082.1Scarecrow-like protein
XLOC_001590	---NA---
XLOC_001732	PSS21187.1DNA polymerase zeta catalytic subunit like
XLOC_001750	PSS26478.1Structural maintenance of chromosomes protein
XLOC_001836	XP_021824696.1putative transferase At1g60990, chloroplastic
XLOC_001860	RWR88697.1ribosomal protein S3 mitochondrion
XLOC_001884	PON37092.1Cytochrome c-552
XLOC_001901	PHT60200.1Clustered mitochondria protein
XLOC_001939	PSS30755.1B3 domain-containing protein
XLOC_001986	PSR96050.1Molybdate transporter like
XLOC_002012	XP_008243194.1 UPF0098 protein CPn_0877/CP_0992/CPj0877/CpB0906
XLOC_002049	XP_011074957.1FT-interacting protein 1
XLOC_002142	PSS30710.1DNA damage-binding protein
XLOC_002151	PSS26939.1ATP-dependent DNA helicase Q-like
XLOC_002257	PSS33751.1Myotubularin-related protein like
XLOC_002264	XP_027113237.1protein DMP3-like
XLOC_002276	---NA---
XLOC_002283	EOX91647.1Acetamidase/Formamidase family protein isoform 2
XLOC_002323	PSR96815.1Glucose-6-phosphate 1-epimerase
XLOC_002350	PSS34257.1Rust resistance kinase
XLOC_002359	PSS07591.1ATP-dependent RNA helicase
XLOC_002392	NP_001313004.1galactinol synthase 2
XLOC_002492	PSR85083.1Ubiquitin-conjugating enzyme like
XLOC_002511	PSS33465.1Membrane-associated kinase regulator 4
XLOC_002529	XP_027179166.1protein STRICTOSIDINE SYNTHASE-LIKE 7-like
XLOC_002555	KYP34423.1Retrovirus-related Pol polyprotein LINE-1
XLOC_002556	XP_023915578.1F-box protein PP2-B10-like
XLOC_002579	CAB83146.1leucine-rich repeat protein LRP-like
XLOC_002587	AUD40506.1mitogen-activated protein kinase kinase 3
XLOC_002590	XP_027101865.1LOB domain-containing protein 25-like
XLOC_002645	XP_002278652.1 glutaredoxin-C6
XLOC_002724	PSR87660.1MDIS1-interacting receptor like kinase
XLOC_002725	PSR87660.1MDIS1-interacting receptor like kinase
XLOC_002743	PSS04531.1Aluminum-activated malate transporter like
XLOC_002751	PSS19804.1Mitogen-activated protein kinase
XLOC_002774	XP_021599879.1vacuolar protein sorting-associated protein 55 homolog
XLOC_002803	RVW97619.1Transposon TX1 uncharacterized 149 kDa protein
XLOC_002823	---NA---
XLOC_002824	XP_011086652.1probable E3 ubiquitin-protein ligase XERICO
XLOC_002880	XP_021807452.1CSC1-like protein At1g69450
XLOC_002888	---NA---
XLOC_002921	XP_021594292.1RNA-dependent RNA polymerase 1
XLOC_002982	PSS28607.1Large proline-rich protein
XLOC_003030	PSS14278.1Vimentin like
XLOC_003098	KYP58728.1Retrovirus-related Pol polyprotein from transposon TNT 1-94
XLOC_003121	AXF74604.1zinc finger protein CONSTANS-LIKE 4
XLOC_003122	AXF74604.1zinc finger protein CONSTANS-LIKE 4
XLOC_003181	XP_015943646.1uncharacterized protein LOC107468801
XLOC_003224	EOY07291.18-amino-7-oxononanoate synthase
XLOC_003371	XP_018623835.1 protein PYRICULARIA ORYZAE RESISTANCE 21-like isoform X2
XLOC_003402	XP_022027042.1protein SPIRAL1-like 5
XLOC_003419	PSS15609.1Serine incorporator
XLOC_003451	XP_018806018.1 probable beta-D-xylosidase 5
XLOC_003481	---NA---
XLOC_003514	PSS21779.1Serine/threonine-protein kinase
XLOC_003565	RVX06502.1Transcription factor CYCLOIDEA
XLOC_003661	PSS09482.1Non-specific phospholipase
XLOC_003765	XP_017412355.1 protein LIGHT-DEPENDENT SHORT HYPOCOTYLS 4-like
XLOC_003795	AEL30371.1TIR-NBS-LRR type disease resistance protein
XLOC_003823	PSR85011.1Phosphatidylinositol 4-kinase
XLOC_003858	XP_022724130.1dof zinc finger protein DOF2.4-like
XLOC_003868	PSR93160.17-deoxyloganetic acid glucosyltransferase
XLOC_003880	PSR96749.1Phosphopantothenoylcysteine decarboxylase
XLOC_003937	PSS11759.1TATA-binding protein-associated factor like
XLOC_004076	XP_023884828.1uncharacterized protein LOC111997023
XLOC_004103	XP_022759142.1receptor-like protein kinase FERONIA
XLOC_004176	---NA---
XLOC_004177	---NA---
XLOC_004265	---NA---
XLOC_004293	PSS21683.1Protein SHI RELATED SEQUENCE like
XLOC_004307	---NA---
XLOC_004321	XP_002314521.1cell wall / vacuolar inhibitor of fructosidase 1
XLOC_004403	PSS14357.1Envelope glycoprotein like
XLOC_004413	PSS04074.1Mitochondrial translation factor like
XLOC_004512	NP_001289508.1agamous-like MADS-box protein AGL8 homolog
XLOC_004513	---NA---
XLOC_004522	PKA52309.1integrator complex subunit 11
XLOC_004534	XP_022721533.1protein indeterminate-domain 7-like isoform X2
XLOC_004542	RVW19866.1Retrovirus-related Pol polyprotein from transposon RE1
XLOC_004596	XP_018823263.1 probable mediator of RNA polymerase II transcription subunit 37c
XLOC_004669	---NA---
XLOC_004907	PSS30407.1SAGA-associated factor like
XLOC_004917	XP_004234972.1phytolongin Phyl2.1
XLOC_004992	PSS24935.1Heat shock 70 protein
XLOC_004994	PSR89057.1Protein SAR DEFICIENT like
XLOC_005054	EEF29289.1 Alpha-expansin 4 precursor, putative
XLOC_005132	RWR83372.1DUF659 domain-containing protein/Dimer_Tnp_hAT domain-containing protein
XLOC_005163	---NA---
XLOC_005185	PSS36559.1MLO-like protein
XLOC_005220	PKU80164.1RNA-directed DNA polymerase
XLOC_005222	XP_015900916.2metal tolerance protein 1-like
XLOC_005253	---NA---
XLOC_005256	PWA81295.1transposon Ty3-I Gag-Pol polyprotein
XLOC_005267	XP_027073124.1homeobox-leucine zipper protein ATHB-40
XLOC_005346	XP_023876899.1SH2 domain-containing protein B-like
XLOC_005418	XP_008231108.1 protein transport protein Sec61 subunit gamma
XLOC_005454	XP_006420839.1protein DMR6-LIKE OXYGENASE 2
XLOC_005464	PSR94824.1Protein indeterminate-domain like
XLOC_005478	XP_010258630.1 receptor-like protein 12 isoform X1
XLOC_005504	---NA---
XLOC_005506	RWR94899.1ataxia telangiectasia mutated family protein
XLOC_005518	CBL94163.1putative RNA-directed DNA polymerase (Reverse transcriptase)
XLOC_005582	PSS09478.1WD repeat-containing protein
XLOC_005597	PSR96948.1Linoleate 13S-lipoxygenase
XLOC_005601	PSR96689.1Protein tincar like
XLOC_005777	PSS15687.1Calcium-transporting ATPase
XLOC_005787	XP_022881081.1MACPF domain-containing protein At1g14780-like
XLOC_005792	PSR93174.1Acid phosphatase protein
XLOC_005806	PSR97882.1Transcription factor bHLH147 like
XLOC_005807	---NA---
XLOC_005857	---NA---
XLOC_005894	PSS15715.1DNA-directed RNA polymerase V subunit 5A like
XLOC_005943	XP_007219614.1hexose carrier protein HEX6
XLOC_005972	XP_010654393.1 dnaJ homolog subfamily B member 6-A isoform X2
XLOC_005976	AFU07481.1phosphate transporter
XLOC_006059	---NA---
XLOC_006109	XP_022028055.1phosphatidylinositol 3,4,5-trisphosphate 3-phosphatase and protein-tyrosine-phosphatase PTEN2A-like
XLOC_006112	XP_008233844.1 transcription factor ICE1-like isoform X1
XLOC_006129	KYP76032.1Retrovirus-related Pol polyprotein from transposon TNT 1-94
XLOC_006130	---NA---
XLOC_006166	XP_027062585.1SH2 domain-containing protein A-like
XLOC_006175	XP_016731686.1 eukaryotic translation initiation factor 5A-2-like
XLOC_006218	RXI05546.1hypothetical protein DVH24_017588
XLOC_006219	XP_023512244.1RING-H2 finger protein ATL16-like
XLOC_006222	XP_022747848.1putative disease resistance protein At3g14460
XLOC_006396	CAQ77575.1 orf185 (mitochondrion)
XLOC_006397	---NA---
XLOC_006413	---NA---
XLOC_006419	PSR96222.1Phosphoinositide phosphatase
XLOC_006446	XP_023743953.1hydroxyacylglutathione hydrolase cytoplasmic isoform X1
XLOC_006458	CBL94163.1putative RNA-directed DNA polymerase (Reverse transcriptase)
XLOC_006485	PSR85974.1Ethylene response sensor like
XLOC_006491	XP_021645890.1dormancy-associated protein homolog 3-like
XLOC_006499	PSR86301.1Serine carboxypeptidase-like
XLOC_006516	PSS35737.1Protein IQ-DOMAIN like
XLOC_006537	XP_016563022.1 respiratory burst oxidase homolog protein C
XLOC_006539	AII25876.1NADPH oxidase A
XLOC_006542	PSR98230.1Uveal autoantigen with coiled-coil domains and ankyrin repeats protein
XLOC_006688	---NA---
XLOC_006689	---NA---
XLOC_006690	PKA47469.1Retrovirus-related Pol polyprotein from transposon TNT 1-94
XLOC_006691	RVW32883.1Retrovirus-related Pol polyprotein from transposon RE1
XLOC_006794	---NA---
XLOC_006826	OTF95781.1putative SGF29 tudor-like domain-containing protein
XLOC_006839	XP_011100361.1O-acyltransferase WSD1
XLOC_006927	PSS04310.1Acyl-CoA N-acyltransferase protein
XLOC_006940	XP_011090652.1putative calcium-transporting ATPase 13, plasma membrane-type
XLOC_006954	PSS01314.1GDSL esterase/lipase
XLOC_006963	PSS07232.1F-box protein
XLOC_006967	---NA---
XLOC_006985	PNY14921.1ribosomal protein S10
XLOC_006986	PNY14921.1ribosomal protein S10
XLOC_007084	RVW25953.1Transposon Ty3-I Gag-Pol polyprotein
XLOC_007113	PSR97954.1CASP-like protein
XLOC_007122	EXB44941.1Chaperonin 60 subunit beta 4
XLOC_007160	PSS33964.1Phosphoribosylformylglycinamidine synthase
XLOC_007199	PSS18184.1F-box/kelch-repeat protein
XLOC_007214	XP_011034773.1 calvin cycle protein CP12-3, chloroplastic-like
XLOC_007287	EOX96496.1ELMO/CED-12 family protein isoform 3
XLOC_007321	KZV22615.1Magnesium transporter 2 isoform 2
XLOC_007345	PSR96419.1NHL repeat-containing protein
XLOC_007368	PSS07805.1WAT1-related protein
XLOC_007402	PSR86538.1Cyclin-dependent protein kinase
XLOC_007479	PSS14335.1Cytochrome b561 and DOMON domain-containing protein
XLOC_007495	PSS08342.1Serine-rich adhesin for platelets like
XLOC_007526	PSS02985.1Ubiquitin domain-containing protein
XLOC_007631	PSR84936.1Tetraketide alpha-pyrone reductase
XLOC_007652	PSR93465.1Dehydrogenase/reductase SDR family member on chromosome X like
XLOC_007675	PSR99759.1Transmembrane protein like
XLOC_007716	XP_024985342.1receptor-like protein EIX2
XLOC_007723	KHG10403.1putative mitochondrial chaperone bcs1
XLOC_007735	---NA---
XLOC_007878	PSS11971.1Callose synthase
XLOC_007897	PSR91458.1ABC transporter C family member 10 like
XLOC_007995	PSS32946.1Protein TRANSPARENT TESTA GLABRA like
XLOC_008063	PSR88117.1Cleavage and polyadenylation specificity factor subunit 3-II like
XLOC_008083	PSS19750.1ABSCISIC ACID-INSENSITIVE 5-like protein
XLOC_008125	KHG05429.1NAD-specific glutamate dehydrogenase
XLOC_008159	PSS30522.1Receptor-like protein kinase
XLOC_008163	PSS01190.1D-amino-acid transaminase
XLOC_008189	XP_002281889.1 BEL1-like homeodomain protein 4
XLOC_008268	---NA---
XLOC_008279	PSS11179.1F-box protein
XLOC_008310	XP_021293332.1putative disease resistance protein RGA1
XLOC_008344	PON73782.1Serine/threonine protein kinase
XLOC_008378	PSS04724.1Disease resistance protein
XLOC_008391	XP_006338517.1 protein CREG1
XLOC_008470	XP_007030280.1 germin-like protein subfamily 1 member 13
XLOC_008491	---NA---
XLOC_008506	RVW93644.1Retrovirus-related Pol polyprotein from transposon RE2
XLOC_008516	XP_012080011.1probable LRR receptor-like serine/threonine-protein kinase At4g26540
XLOC_008542	XP_023921396.1serine/threonine-protein kinase SRK2E
XLOC_008578	---NA---
XLOC_008631	XP_027335201.1trihelix transcription factor GT-1-like
XLOC_008659	PSS21057.1Autophagy-related protein like
XLOC_008664	---NA---
XLOC_008676	PSS32730.1Protein LURP-one-related like
XLOC_008698	PSS24892.1DnaJ subfamily B member like
XLOC_008702	PSS11563.1Palmitoyl-protein like
XLOC_008730	XP_017649944.1 ethylene-responsive transcription factor RAP2-3
XLOC_008766	PSS07805.1WAT1-related protein
XLOC_008813	XP_022136583.1uncharacterized protein LOC111008254 isoform X2
XLOC_008917	PSS06286.1Succinate-semialdehyde dehydrogenase
XLOC_008955	PSS19309.1DEAD-box ATP-dependent RNA helicase
XLOC_008976	PSR91850.1Hydroxyproline O-galactosyltransferase
XLOC_008982	---NA---
XLOC_008987	PSR96320.1Homeobox-leucine zipper protein
XLOC_009033	XP_010039554.1 pyrophosphate-energized vacuolar membrane proton pump
XLOC_009085	PHT56633.1putative ubiquitin-conjugating enzyme E2 16
XLOC_009137	PSR92936.1CBS domain-containing protein
XLOC_009153	XP_011098895.150S ribosomal protein L27, chloroplastic
XLOC_009169	PSS09464.1Anion transporter 4 like
XLOC_009249	AKE33276.11-deoxy-d-xylulose 5-phosphate reductoisomerase
XLOC_009321	GAV60002.1Reticulon domain-containing protein
XLOC_009394	RWR88365.1peroxidase 42
XLOC_009422	XP_012459121.1 putative glucose-6-phosphate 1-epimerase isoform X1
XLOC_009538	PKA52309.1integrator complex subunit 11
XLOC_009550	PSS00159.1Subtilisin-like protease SBT3.14
XLOC_009567	PSS24695.1Vacuolar protein
XLOC_009578	---NA---
XLOC_009585	XP_023924850.13-hydroxyisobutyryl-CoA hydrolase-like protein 5
XLOC_009607	XP_022750959.1ankyrin repeat-containing protein NPR4-like isoform X2
XLOC_009626	---NA---
XLOC_009628	XP_019055576.1PREDICTED: uncharacterized protein LOC104611017
XLOC_009629	PSR87636.1Lecithin-cholesterol acyltransferase-like
XLOC_009642	PSS26234.1MAP protein
XLOC_009688	XP_003621089.1thioredoxin H2
XLOC_009699	PSR96695.1Inactive poly [ADP-ribose] polymerase SRO2
XLOC_009710	RVW84538.1Retrovirus-related Pol polyprotein from transposon TNT 1-94
XLOC_009726	PSS15795.1DNA ligase
XLOC_009752	PSR96019.1F-box/LRR-repeat protein
XLOC_009778	PSR98652.1Seipin-2 like
XLOC_009794	PSR89298.1Golgin subfamily A member like
XLOC_009807	XP_010660906.1 myosin-9 isoform X1
XLOC_009906	PSS08195.1Ras-related protein like
XLOC_009955	XP_011095412.1uncharacterized protein LOC105174880
XLOC_009983	XP_002263323.1 luminal-binding protein 5
XLOC_010077	XP_022718966.1thioredoxin-like 1-1, chloroplastic
XLOC_010092	---NA---
XLOC_010105	OVA20676.1Cytochrome P450
XLOC_010111	OEL15865.1RING finger and transmembrane domain-containing protein 2
XLOC_010121	---NA---
XLOC_010151	PSS17397.1MDIS1-interacting receptor like kinase
XLOC_010165	---NA---
XLOC_010172	---NA---
XLOC_010178	PSS31704.1Leucine-rich repeat receptor-like protein kinase precursor
XLOC_010189	XP_018440372.1 ras-related protein RABD2b-like isoform X1
XLOC_010191	RWR82740.1Small GTPase superfamily
XLOC_010239	PNX73744.1gag-pol polyprotein
XLOC_010242	PSS34653.1Clathrin light chain like
XLOC_010457	XP_007013855.2 translation initiation factor IF-3
XLOC_010487	XP_021843396.1ubiquitin-like protein 5 isoform X1
XLOC_010523	XP_012077326.1vacuolar-processing enzyme
XLOC_010586	---NA---
XLOC_010592	PSS11587.1Trihelix transcription factor
XLOC_010631	PSR95245.1Proteasome activator subunit like
XLOC_010692	---NA---
XLOC_010703	PSS30821.1Transmembrane protein TauE like protein
XLOC_010707	PSS14515.1Formate--tetrahydrofolate ligase
XLOC_010711	---NA---
XLOC_010720	XP_023752612.1nuclear transcription factor Y subunit B-3-like
XLOC_010721	ABK96228.1unknown
XLOC_010773	---NA---
XLOC_010782	PSR93096.1Homeobox protein like
XLOC_010902	PSS00198.1Reticuline oxidase
XLOC_010930	PSS15795.1DNA ligase
XLOC_010937	XP_017700367.1F-box protein At1g67340-like
XLOC_010974	PSS02016.111-oxo-beta-amyrin 30-oxidase
XLOC_011022	PON85070.1F-box domain containing protein
XLOC_011063	RVW26768.1Vacuolar-sorting receptor 4
XLOC_011076	PSR89479.1Cytochrome P450 71A8 like
XLOC_011077	PSR89479.1Cytochrome P450 71A8 like
XLOC_011090	PSS15838.1E3 ubiquitin-protein like
XLOC_011164	XP_023900336.1protein NBR1 homolog
XLOC_011190	OAY68551.1putative LRR receptor-like serine/threonine-protein kinase
XLOC_011226	---NA---
XLOC_011230	PSR99630.1Cysteine protease
XLOC_011237	---NA---
XLOC_011293	PKA61678.1putative mitochondrial protein
XLOC_011375	XP_027061084.1squamosa promoter-binding-like protein 3
XLOC_011438	XP_019074106.1 G-type lectin S-receptor-like serine/threonine-protein kinase B120 isoform X1
XLOC_011465	RVW53285.1 Amidase 1
XLOC_011509	RVW70313.1Retrovirus-related Pol polyprotein from transposon TNT 1-94
XLOC_011554	PSS21415.1Phospholipase D delta like
XLOC_011652	PSS26750.1Pentatricopeptide repeat-containing protein
XLOC_011706	PSS31222.1Nucleoredoxin like
XLOC_011715	PSS30114.1Acyl-activating enzyme like
XLOC_011784	AUD40407.1DELLA protein 3
XLOC_011813	PSS04278.1Syntaxin-61 like
XLOC_011821	XP_010272289.1 QWRF motif-containing protein 2-like
XLOC_011973	---NA---
XLOC_011994	XP_010047187.1 homeobox protein knotted-1-like 3 isoform X3
XLOC_012001	PSS33793.1Pentatricopeptide repeat-containing protein
XLOC_012003	---NA---
XLOC_012068	RWR80163.1Retrotransposon gag protein
XLOC_012176	PSS24091.1Ankyrin repeat domain-containing protein
XLOC_012180	PSR89823.1Berberine bridge enzyme-like
XLOC_012209	XP_022148743.1ADP-ribosylation factor 2
XLOC_012251	XP_020212094.1peroxidase P7-like
XLOC_012300	CDP13752.1unnamed protein product
XLOC_012301	CDP13752.1unnamed protein product
XLOC_012453	PSS21098.1Vacuolar fusion protein
XLOC_012459	XP_027084980.1amino acid permease 8-like
XLOC_012469	XP_021664985.1probable zinc metalloprotease EGY2, chloroplastic
XLOC_012471	---NA---
XLOC_012504	XP_021671711.1protein LYK5
XLOC_012553	XP_010647869.1 transcription factor TGA2.3
XLOC_012620	PSR93397.1Ycf20 family protein
XLOC_012627	XP_008238118.1 formamidase-like isoform X1
XLOC_012642	---NA---
XLOC_012732	PSR95457.1Bifunctional nitrilase/nitrile hydratase
XLOC_012769	PSS01380.1GDSL esterase/lipase
XLOC_012773	PQM38378.1exosome component 10 isoform X2
XLOC_012860	PSS34724.1Protein SIEL like
XLOC_012872	PSR95930.1adenylate kinase
XLOC_012940	PSS24445.1Disease resistance RPP13-like protein
XLOC_012958	XP_019173741.1 putative disease resistance protein RGA4
XLOC_013037	---NA---
XLOC_013110	XP_027113325.1zinc-finger homeodomain protein 4
XLOC_013141	PSS34473.1Phosphoinositide phospholipase
XLOC_013247	PSS35061.1Protein trichome birefringence-like
XLOC_013256	XP_022727079.1probable beta-D-xylosidase 5 isoform X1
XLOC_013260	KYP56875.1Retrovirus-related Pol polyprotein LINE-1
XLOC_013424	XP_018859878.1 transcriptional regulator DEF1-like
XLOC_013436	XP_009627092.1 auxin-induced protein 15A-like
XLOC_013459	AHC32018.1galactokinase 1
XLOC_013505	PSR89577.1GDSL esterase/lipase
XLOC_013541	PSS31419.1Calcium-binding protein CML10
XLOC_013560	---NA---
XLOC_013576	PSS13435.1Leaf rust 10 disease-resistance locus receptor-like protein kinase
XLOC_013582	EOY04465.1RING/U-box superfamily protein isoform 1
XLOC_013623	PSS17978.1DNA-directed RNA polymerase II subunit 1 like
XLOC_013637	PSS21643.1Serine/threonine-protein kinase kinX
XLOC_013642	PSR89096.1Transcription factor like
XLOC_013649	PSS01924.13-hydroxyisobutyrate dehydrogenase-like
XLOC_013650	PSS01924.13-hydroxyisobutyrate dehydrogenase-like
XLOC_013700	XP_006450264.1enhancer of rudimentary homolog
XLOC_013717	PSS07377.1Protein EARLY FLOWERING like
XLOC_013736	PSS16141.1Aspartic proteinase
XLOC_013737	AHB32105.1aspartic proteinase
XLOC_013756	---NA---
XLOC_013800	PSS19866.1Neurotrophin receptor-interacting factor like
XLOC_013805	OAY42690.1hypothetical protein MANES_08G008300
XLOC_013808	XP_023922509.1probable (S)-N-methylcoclaurine 3'-hydroxylase isozyme 2
XLOC_013810	XP_023922509.1probable (S)-N-methylcoclaurine 3'-hydroxylase isozyme 2
XLOC_013811	---NA---
XLOC_013820	PSS30039.1Rhamnogalacturonate lyase
XLOC_013828	PSS04605.1Cytochrome P450 89A2 like
XLOC_013837	XP_025663492.1serine/threonine-protein kinase CTR1-like
XLOC_013883	XP_017248738.1 ubiquitin-conjugating enzyme E2 28-like
XLOC_013910	XP_011005462.1 staphylococcal-like nuclease CAN2
XLOC_013940	PSR89268.1Extra-large guanine nucleotide-binding protein like
XLOC_013946	PSS31298.1Cysteine protease
XLOC_013966	XP_024023656.1transcription factor TGA1 isoform X2
XLOC_013974	PSR93157.17-deoxyloganetic acid glucosyltransferase
XLOC_014014	ONM06616.1Retrovirus-related Pol polyprotein LINE-1
XLOC_014019	AUB45106.1ABA transporter
XLOC_014022	PSS34865.1Myosin-binding protein
XLOC_014059	XP_019234233.1 protein DETOXIFICATION 27-like
XLOC_014081	PSS01388.1UPF0481 protein
XLOC_014115	PSR96520.1Protein transport protein Sec24-like
XLOC_014157	PSR98055.1Phosphoglucan phosphatase DSP4
XLOC_014177	XP_022744592.1pentatricopeptide repeat-containing protein At3g12770-like isoform X1
XLOC_014189	PSR86078.1F-box protein
XLOC_014211	XP_018844785.1 CLAVATA3/ESR (CLE)-related protein 25-like
XLOC_014257	OMO64412.1reverse transcriptase
XLOC_014283	PSR87797.1Plectin like
XLOC_014361	---NA---
XLOC_014365	GBC10048.1hypothetical protein RclHR1_00930026
XLOC_014453	---NA---
XLOC_014528	XP_002877709.1ADP-ribosylation factor-like protein 8a
XLOC_014558	PSS28708.1Methyltransferase PMT9
XLOC_014574	PSS34739.1TOM1-like protein
XLOC_014633	EEF34889.1conserved hypothetical protein
XLOC_014646	XP_002276715.1 UDP-glycosyltransferase 88A1-like
XLOC_014661	XP_011075228.1calcium-dependent protein kinase 32
XLOC_014666	XP_023902342.1autophagy-related protein 8C
XLOC_014673	PSS04941.1Accelerated cell death like
XLOC_014723	GAV88379.1AA_permease_2 domain-containing protein/AA_permease_C domain-containing protein
XLOC_014763	PSS24914.1E3 ubiquitin-protein like
XLOC_014773	PSS14114.1U-box domain-containing protein
XLOC_014816	XP_020415621.1zinc finger MYM-type protein 1
XLOC_014924	---NA---
XLOC_014959	PIM99513.1Mitochondrial ADP/ATP carrier protein
XLOC_015277	PSR93201.1Protein EARLY FLOWERING like
XLOC_015284	---NA---
XLOC_015384	RVW70899.1LINE-1 retrotransposable element ORF2 protein
XLOC_015399	PSS02933.1La-related protein like
XLOC_015460	NP_001312598.19-cis-epoxycarotenoid dioxygenase NCED1, chloroplastic-like
XLOC_015470	XP_027068750.1target of rapamycin complex subunit LST8
XLOC_015507	PSR94903.1E3 ubiquitin-protein like
XLOC_015542	KYP56875.1Retrovirus-related Pol polyprotein LINE-1
XLOC_015589	ACG60702.1HcrVf1-like protein
XLOC_015638	RVX13688.1putative glycosyltransferase
XLOC_015717	---NA---
XLOC_015735	CBL94163.1putative RNA-directed DNA polymerase (Reverse transcriptase)
XLOC_015777	PSS21242.1Acyl-CoA-binding domain-containing protein
XLOC_015806	PSR89693.1Transcriptional corepressor like
XLOC_015886	---NA---
XLOC_015921	---NA---
XLOC_015948	XP_010644341.1 cysteine-rich receptor-like protein kinase 10 isoform X1
XLOC_015949	XP_010644341.1 cysteine-rich receptor-like protein kinase 10 isoform X1
XLOC_015966	XP_002274926.1 ADP-ribosylation factor 1-like 2 isoform X2
XLOC_015981	PSS09403.1Glutathione peroxidase
XLOC_015995	AMT84627.1light-harvesting complex
XLOC_016170	PSS14275.160S ribosomal protein L18a-like protein
XLOC_016201	PSS33538.1Folylpolyglutamate synthase
XLOC_016226	PSS31419.1Calcium-binding protein CML10
XLOC_016233	---NA---
XLOC_016283	PSS04772.1Lipid-phosphate phosphatase
XLOC_016292	AMN88620.1pyruvate kinase
XLOC_016302	NP_001292563.1SKP1-like protein 1A
XLOC_016329	PKU79361.1integrator complex subunit 11
XLOC_016375	XP_015867679.1auxin-responsive protein SAUR76-like
XLOC_016395	XP_017969639.1 probable tyrosine-protein phosphatase At1g05000 isoform X1
XLOC_016437	XP_023759460.1protein ACCELERATED CELL DEATH 6-like
XLOC_016444	RWR92622.1disease resistance protein TAO1
XLOC_016467	XP_007045083.1 myb-like protein I
XLOC_016484	PSS26708.1RNA helicase
XLOC_016487	XP_003537493.1probable inactive receptor-like protein kinase At3g56050
XLOC_016505	---NA---
XLOC_016536	PSS34606.1UPF0481 protein
XLOC_016603	XP_019171307.1 putative late blight resistance protein homolog R1B-16 isoform X2
XLOC_016610	XP_010254084.1 30S ribosomal protein S17, chloroplastic
XLOC_016611	PSS07431.1Rop guanine nucleotide exchange factor like
XLOC_016649	PSR96255.1Glycerophosphodiester phosphodiesterase
XLOC_016680	OTF90961.1 putative heat shock protein DnaJ, cysteine-rich domain-containing protein
XLOC_016770	XP_011026286.1 cytochrome P450 78A7-like
XLOC_016776	XP_012084673.140S ribosomal protein S25 isoform X1
XLOC_016925	XP_011076613.1peroxidase P7
XLOC_016930	XP_022776724.1probable 6-phosphogluconolactonase 1 isoform X1
XLOC_016932	PSR96419.1NHL repeat-containing protein
XLOC_016999	XP_021650761.1L-type lectin-domain containing receptor kinase V.9-like
XLOC_017080	PSS28654.1Cyclin-D1-1 like
XLOC_017183	PSR91746.1Glycine dehydrogenase
XLOC_017195	PSR86026.1Sodium/hydrogen exchanger 2 like
XLOC_017202	XP_020536002.1probable LRR receptor-like serine/threonine-protein kinase At4g36180
XLOC_017336	---NA---
XLOC_017343	XP_017215187.1 putative disease resistance protein RGA4
XLOC_017382	XP_024180204.1TMV resistance protein N-like
XLOC_017423	---NA---
XLOC_017463	PSS00272.1Autophagy protein isoform 2
XLOC_017683	XP_021652023.1BTB/POZ domain-containing protein At1g21780
XLOC_017705	PSS35817.1H/ACA ribonucleoprotein complex subunit like
XLOC_017717	---NA---
XLOC_017723	XP_012069613.1heat shock 70 kDa protein 8
XLOC_017801	AYP70935.1endoglucanase 4
XLOC_017892	KYP34558.1Retrotransposable element Tf2
XLOC_017912	AZL19396.1transcription factor WRKY8
XLOC_017941	---NA---
XLOC_018009	PSS05658.1Protein strawberry notch like
XLOC_018049	XP_018806018.1 probable beta-D-xylosidase 5
XLOC_018120	XP_010053448.1 protein NRT1/ PTR FAMILY 6.3
XLOC_018135	PSS24358.1(+)-neomenthol dehydrogenase
XLOC_018140	PSS36264.1Glutamate dehydrogenase
XLOC_018149	PSS24572.1ABC transporter C family member 9 like
XLOC_018184	PSS11997.1Zinc finger A20 and AN1 domain-containing stress-associated protein
XLOC_018240	---NA---
XLOC_018263	XP_024442287.1peptide methionine sulfoxide reductase
XLOC_018280	PIN16317.1Soluble epoxide hydrolase
XLOC_018315	XP_027097338.1piezo-type mechanosensitive ion channel homolog isoform X1
XLOC_018383	PSR95378.1Liprin-alpha-2 like
XLOC_018389	XP_012440607.1PREDICTED: uncharacterized protein LOC105765883
XLOC_018431	---NA---
XLOC_018445	PSS26856.1U-box domain-containing protein
XLOC_018461	PSS24526.1TMV resistance protein like
XLOC_018488	PSS15703.1Triacylglycerol lipase
XLOC_018549	PON88277.1Aminotransferase-like mobile domain containing protein
XLOC_018564	PSR87632.1Protein PHLOEM PROTEIN 2-LIKE like
XLOC_018567	RWR98131.1hypothetical protein CKAN_02763200
XLOC_018584	GBC10048.1hypothetical protein RclHR1_00930026
XLOC_018652	PSS33092.1Methyl-CpG-binding domain-containing protein
XLOC_018665	---NA---
XLOC_018716	---NA---
XLOC_018717	---NA---
XLOC_018828	GAV67986.1DUF4228 domain-containing protein
XLOC_018875	PSS30361.1Futsch light chain LC(f) like
XLOC_018910	PSS01235.1BRISC and BRCA1-A complex member like
XLOC_018943	---NA---
XLOC_018948	PSS09542.1CBL-interacting protein kinase
XLOC_018962	---NA---
XLOC_019063	PSR86602.1E3 ubiquitin-protein ligase MARCH10
XLOC_019069	XP_015582676.1E3 ubiquitin-protein ligase CCNB1IP1 homolog isoform X1
XLOC_019157	RVX02137.1AP-4 complex subunit epsilon
XLOC_019169	---NA---
XLOC_019197	PSR87869.1Protein RMD5 A like
XLOC_019222	XP_008358139.1 TATA-binding protein-associated factor BTAF1-like isoform X2
XLOC_019238	PSR89334.1Glycerol kinase
XLOC_019259	XP_009629528.1 beta-D-glucosyl crocetin beta-1,6-glucosyltransferase-like isoform X1
XLOC_019302	PSS28497.1BOI-related E3 ubiquitin-protein ligase 3
XLOC_019308	PSS13894.1G-box-binding factor like
XLOC_019313	XP_027341503.1autophagy-related protein 8C-like
XLOC_019323	---NA---
XLOC_019342	XP_023918551.1receptor-like serine/threonine-protein kinase SD1-6
XLOC_019364	PSS05790.1G-type lectin S-receptor-like serine/threonine-protein kinase
XLOC_019365	PSS05790.1G-type lectin S-receptor-like serine/threonine-protein kinase
XLOC_019442	XP_015887216.1beta-galactosidase 9 isoform X1
XLOC_019480	OMO96467.1Plastocyanin-like protein
XLOC_019514	RWR98175.1cytochrome c oxidase subunit 2
XLOC_019524	KZV22615.1Magnesium transporter 2 isoform 2
XLOC_019546	PSR96702.1Glutaredoxin-C1 like
XLOC_019551	XP_022888663.1thioredoxin-like 3-3
XLOC_019570	XP_016537461.1 prolyl 3-hydroxylase 1 isoform X3
XLOC_019591	XP_022764813.1U-box domain-containing protein 44-like
XLOC_019600	PSS32537.1Phosphoinositide phospholipase
XLOC_019605	PSS26802.1GDP-fucose protein O-fucosyltransferase protein
XLOC_019606	RVX13579.1Retrovirus-related Pol polyprotein from transposon RE2
XLOC_019611	---NA---
XLOC_019651	RVW17269.1D-amino-acid transaminase, chloroplastic
XLOC_019699	PSS01364.1Disease resistance protein
XLOC_019739	PSS01364.1Disease resistance protein
XLOC_019754	YP_004237279.1ribosomal protein S1 (mitochondrion)
XLOC_019774	PSR90138.1C2 domain-containing protein
XLOC_019854	PSS10070.1Xyloglucan endotransglucosylase/hydrolase protein
XLOC_019907	PSS05936.1SH3 domain-containing protein
XLOC_019947	---NA---
XLOC_019987	PSS14176.1Serine/arginine-rich splicing factor like
XLOC_019991	PSS26925.1Two-component response regulator like
XLOC_019996	PSS26925.1Two-component response regulator like
XLOC_020003	PSR86691.1K(+)-stimulated pyrophosphate-energized sodium pump (Na(+)-PPase) like
XLOC_020016	PSR86692.1Ethylene-responsive transcription factor
XLOC_020091	PSS26251.1CBL-interacting serine/threonine-protein kinase
XLOC_020094	PSS23510.1Rho GTPase-activating protein
XLOC_020115	---NA---
XLOC_020129	PSR86168.1E3 ubiquitin-protein like
XLOC_020239	---NA---
XLOC_020251	PNY16248.1glycosyl transferase (glycosyl transferase family 2)
XLOC_020263	PSS11781.1CBL-interacting serine/threonine-protein kinase
XLOC_020281	XP_020883733.1ubiquitin-conjugating enzyme E2 variant 1C isoform X2
XLOC_020395	PSS26300.1Melanocyte-stimulating hormone receptor like
XLOC_020402	AUD40406.1DELLA protein 2
XLOC_020406	XP_027069064.1protein ELF4-LIKE 4-like isoform X1
XLOC_020484	XP_010065644.1 phospho-2-dehydro-3-deoxyheptonate aldolase 2, chloroplastic
XLOC_020493	PSR92489.1Cell wall / vacuolar inhibitor of fructosidase
XLOC_020519	XP_002279887.2 RNA-binding protein 39 isoform X2
XLOC_020532	PSS25993.1Thaumatin-like protein
XLOC_020592	PSS13690.1Agamous-like MADS-box protein
XLOC_020643	XP_018856432.1 protein EMBRYO SAC DEVELOPMENT ARREST 3, chloroplastic-like isoform X2
XLOC_020666	ARU79070.1beta-glucosidase 2 GH1 family
XLOC_020677	PSS26185.1Protein EXECUTER 1 like
XLOC_020728	XP_015874812.1J domain-containing protein DDB_G0295729
XLOC_020754	PSS11997.1Zinc finger A20 and AN1 domain-containing stress-associated protein
XLOC_020904	---NA---
XLOC_021056	---NA---
XLOC_021092	PSS15466.1Serine/threonine-protein phosphatase 6 regulatory ankyrin repeat subunit B like
XLOC_021114	XP_008374731.1 protein ASPARTIC PROTEASE IN GUARD CELL 1
XLOC_021295	PSR86910.13-methyl-2-oxobutanoate hydroxymethyltransferase
XLOC_021331	PSS30011.1TMV resistance protein like
XLOC_021472	PSS36446.1Elongation of fatty acids protein like
XLOC_021532	XP_023907723.1aspartate, glycine, lysine and serine-rich protein-like
XLOC_021537	PSS07995.1Tip elongation aberrant protein
XLOC_021545	OVA00577.1Amidohydrolase 1
XLOC_021583	YP_004237259.1cytochrome c biogenesis FN (mitochondrion)
XLOC_021692	GAV63787.1UBN2_3 domain-containing protein
XLOC_021713	PQQ02120.1GDSL esterase/lipase
XLOC_021830	PSR96702.1Glutaredoxin-C1 like
XLOC_021954	PSS10301.1Protein transport protein like
XLOC_021991	XP_021911076.1auxin-repressed 12.5 kDa protein isoform X2
XLOC_021992	PSS24446.1Disease resistance RPP13-like protein
XLOC_021998	PSR94789.1Receptor-like serine/threonine-protein kinase
XLOC_022016	RWR94899.1ataxia telangiectasia mutated family protein
XLOC_022057	---NA---
XLOC_022083	---NA---
XLOC_022132	XP_004306686.1 abscisic acid receptor PYL9-like
XLOC_022133	XP_025012290.1uncharacterized protein LOC112533968
XLOC_022155	BAO50884.1ATP synthase F1 subunit 1 (mitochondrion)
XLOC_022169	---NA---
XLOC_022208	GBC10048.1hypothetical protein RclHR1_00930026
XLOC_022236	GBC10048.1hypothetical protein RclHR1_00930026
XLOC_022253	XP_002283087.1 glycerol-3-phosphate acyltransferase 5
XLOC_022261	XP_015866980.1transcription factor MYB77-like
XLOC_022277	PSS02025.1Histone like
XLOC_022344	XP_019198845.1 myosin heavy chain kinase B-like
XLOC_022412	ANY93398.3ClpP (chloroplast)
XLOC_022448	PSR96073.1G-type lectin S-receptor-like serine/threonine-protein kinase
XLOC_022452	PIN25375.1Molecular chaperone (small heat-shock protein Hsp26/Hsp42)
XLOC_022490	PWZ22060.1Craniofacial development protein 2
XLOC_022527	PSS09954.1Glycosyltransferase-like KOBITO
XLOC_022645	---NA---
XLOC_022802	PON31337.1Transmembrane protein
XLOC_022803	PSS26980.1ATP-dependent tryptophan/phenylalanine/tyrosine adenylase
XLOC_022893	PSR94824.1Protein indeterminate-domain like
XLOC_022936	PSS14332.1Thymidine kinase
XLOC_022967	GBC10048.1hypothetical protein RclHR1_00930026
XLOC_022968	GBC10048.1hypothetical protein RclHR1_00930026
XLOC_022990	BAW35443.1thaumatin-like protein
XLOC_023053	PSR88068.1Proline-rich receptor-like protein kinase
XLOC_023100	PSR89473.1DNA replication regulator like
XLOC_023158	---NA---
XLOC_023287	XP_016736570.1 tetraspanin-8-like
XLOC_023295	XP_025015683.1protein SKIP34
XLOC_023404	PSR98592.1Dof zinc finger protein like
XLOC_023428	XP_015574748.1ATP-citrate synthase beta chain protein 2
XLOC_023471	OMO91596.1Peptidoglycan-binding Lysin subgroup
XLOC_023525	XP_015899275.1probable leucine-rich repeat receptor-like serine/threonine-protein kinase At3g14840
XLOC_023528	OTF84779.1putative ribosomal protein L22/L17 (plastid)
XLOC_023551	PSS28958.1Regulator of nonsense transcripts 3B like
XLOC_023582	PSS03071.1Homeobox protein
XLOC_023654	E0CSI1.2RecName: Full=Probable bifunctional methylthioribulose-1-phosphate dehydratase/enolase-phosphatase E1 1; Includes: RecName: Full=Methylthioribulose-1-phosphate dehydratase; Short=MTRu-1-P dehydratase; Includes: RecName: Full=Enolase-phosphatase E1; AltName: Full=2,3-diketo-5-methylthio-1-phosphopentane phosphatase
XLOC_023662	---NA---
XLOC_023667	XP_016674813.1 ATP synthase subunit alpha, mitochondrial-like
XLOC_023684	PSS01342.1Protein ABHD17A like
XLOC_023727	PSR89463.1Serine/threonine-protein kinase
XLOC_023742	---NA---
XLOC_023789	PSS04815.1ABC transporter like
XLOC_023800	QAV58400.1hypothetical chloroplast RF1 (chloroplast)
XLOC_023843	XP_003631469.1 disease resistance protein RPM1
XLOC_023878	KHG17016.1Dephospho-CoA kinase
XLOC_023945	---NA---
XLOC_023975	AVZ45844.16-hydroxynicotinate 3-monooxygenase
XLOC_023987	EOY17025.1 Zinc finger and BTB domain-containing protein 11 isoform 1
XLOC_024025	---NA---
XLOC_024073	CDW75723.1UNKNOWN
XLOC_024081	GBC10048.1hypothetical protein RclHR1_00930026
XLOC_024147	PSR97857.1DEAD-box ATP-dependent RNA helicase
XLOC_024154	XP_007042911.2 phospho-2-dehydro-3-deoxyheptonate aldolase 2, chloroplastic
XLOC_024206	---NA---
XLOC_024237	PKU74657.1integrator complex subunit 11
XLOC_024263	PSS08195.1Ras-related protein like
XLOC_024281	---NA---
XLOC_024292	XP_017420669.1 peroxidase P7-like
XLOC_024300	XP_017420669.1 peroxidase P7-like
XLOC_024354	XP_023876878.1putative disease resistance protein RGA4
XLOC_024361	KYP34423.1Retrovirus-related Pol polyprotein LINE-1
XLOC_024371	PSS34997.1Protein FAR-RED ELONGATED HYPOCOTYL like
XLOC_024389	XP_010942547.1 vacuolar protein sorting-associated protein 32 homolog 2
XLOC_024431	PSS09924.1Disease resistance RPP13-like protein
XLOC_024476	---NA---
XLOC_024513	XP_018843437.1PREDICTED: uncharacterized protein LOC109007973
XLOC_024594	GBC10048.1hypothetical protein RclHR1_00930026
XLOC_024621	PKU79361.1integrator complex subunit 11
XLOC_024628	OVA04698.1START domain
XLOC_024679	XP_022717779.1receptor-like protein 12
XLOC_024750	PSS06210.1Disease resistance protein
XLOC_024760	PSS10179.1Transcription termination factor like
XLOC_024797	XP_006467820.1E3 ubiquitin-protein ligase AIRP2 isoform X1
XLOC_024842	GBC10048.1hypothetical protein RclHR1_00930026
XLOC_024853	RWR87638.1LRAT-like domain-containing protein
XLOC_024874	PSS28708.1Methyltransferase PMT9
XLOC_024948	PSS09948.1Dentin sialoprotein
XLOC_024958	XP_021605632.17-deoxyloganetin glucosyltransferase-like
XLOC_024968	PSS13463.1LIM domain-containing protein
XLOC_025114	XP_018815752.1PREDICTED: uncharacterized protein LOC108987316
XLOC_025118	XP_011074969.1immune-associated nucleotide-binding protein 9-like
XLOC_025172	XP_016673547.1 cytochrome c oxidase subunit 3
XLOC_025173	XP_016673547.1 cytochrome c oxidase subunit 3
XLOC_025251	---NA---
XLOC_025274	---NA---
XLOC_025394	XP_002269984.1 pentatricopeptide repeat-containing protein At1g79080, chloroplastic isoform X1
XLOC_025408	PSS14393.1Auxin-responsive protein
XLOC_025415	PSS23516.1U-box domain-containing protein
XLOC_025461	XP_011099440.1phosphoenolpyruvate carboxykinase (ATP)-like
XLOC_025502	---NA---
XLOC_025553	QAV58400.1hypothetical chloroplast RF1 (chloroplast)
XLOC_025572	EEF38517.1catalytic, putative
XLOC_025591	XP_020524989.1 splicing factor 3B subunit 1-like
XLOC_025796	PSS21254.1Cytochrome P450 81E8 like
XLOC_025835	XP_024160808.14-diphosphocytidyl-2-C-methyl-D-erythritol kinase, chloroplastic isoform X1
XLOC_025879	ACD56614.1predicted protein
XLOC_025886	PSR86295.1RNA-binding, CRM domain protein
XLOC_025888	GBC10048.1hypothetical protein RclHR1_00930026
XLOC_025978	---NA---
XLOC_026015	PSS09405.1Glutathione S-transferase
XLOC_026016	XP_010660813.1 FT-interacting protein 1
XLOC_026046	XP_022770092.1photosystem II 5 kDa protein, chloroplastic-like
XLOC_026134	GBC10048.1hypothetical protein RclHR1_00930026
XLOC_026135	GBC10048.1hypothetical protein RclHR1_00930026
XLOC_026138	AAV44205.1unknow protein
XLOC_026144	GBC10048.1hypothetical protein RclHR1_00930026
XLOC_026177	PSS30529.1Receptor-like protein kinase
XLOC_026181	---NA---
XLOC_026190	KRH17804.1hypothetical protein GLYMA_13G017200
XLOC_026192	GBC10048.1hypothetical protein RclHR1_00930026
XLOC_026195	GBC10048.1hypothetical protein RclHR1_00930026
XLOC_026215	YP_009342744.1ribosomal protein S16 (chloroplast)
XLOC_026220	GBC10048.1hypothetical protein RclHR1_00930026
XLOC_026251	PSS24451.1Pentatricopeptide repeat-containing protein
XLOC_026284	XP_024192350.1TMV resistance protein N-like
XLOC_026351	PSS00460.1Cell cycle checkpoint protein
XLOC_026374	PSR92527.1MRNA stability protein
XLOC_026408	PSR84530.1Zinc finger BED domain-containing protein
XLOC_026450	PSS35961.1Protein transport protein like
XLOC_026478	RVW39613.1Copia protein
XLOC_026483	---NA---
XLOC_026669	---NA---
XLOC_026737	XP_027175484.1pathogen-associated molecular patterns-induced protein A70
XLOC_026786	PSS04845.1Protein translocase subunit SecA like
XLOC_026866	---NA---
XLOC_026888	---NA---
XLOC_026911	XP_027160392.1zinc-finger homeodomain protein 4-like
XLOC_026920	PSS00468.1Protein EARLY-RESPONSIVE TO DEHYDRATION 7 like
XLOC_026949	GBC10048.1hypothetical protein RclHR1_00930026
XLOC_027024	OTG37238.1putative RNA-directed DNA polymerase, eukaryota, Reverse transcriptase zinc-binding domain protein
XLOC_027029	---NA---
XLOC_027048	PSR84844.1Carbonic anhydrase
XLOC_027075	XP_022718874.1transcription repressor MYB5-like
XLOC_027133	---NA---
XLOC_027163	PSS17236.1BTB/POZ domain-containing protein
XLOC_027193	PSR92700.1Sugar transport protein
XLOC_027227	PSS29352.1Cyclin-dependent kinase
XLOC_027255	PSR94875.1U-box domain-containing protein
XLOC_027269	AYP70936.1endoglucanase 8
XLOC_027290	ATI24797.1NADH-plastoquinone oxidoreductase subunit 2 (plastid)
XLOC_027292	OTF84779.1putative ribosomal protein L22/L17 (plastid)
XLOC_027298	OVA06663.1AMP-dependent synthetase/ligase
XLOC_027300	PSR95745.1Holo-[acyl-carrier-protein] synthase
XLOC_027308	PSS10065.1GATA zinc finger domain-containing protein
XLOC_027315	XP_011046375.1 autophagy-related protein 13-like
XLOC_027327	XP_011027643.1PREDICTED: uncharacterized protein LOC105127877
XLOC_027332	XP_021655309.1chloroplast envelope quinone oxidoreductase homolog isoform X1
XLOC_027361	PRQ15618.1putative NADH:ubiquinone reductase (H(+)-translocating) (mitochondrion)
XLOC_027362	KZV35421.1NADH dehydrogenase subunit
XLOC_027364	YP_005090401.1sdh3 gene product (mitochondrion)
XLOC_027365	YP_005090403.1nad1 gene product (mitochondrion)
XLOC_027366	YP_008999560.1cytochrome c oxidase subunit 1 (mitochondrion)
XLOC_027427	PON36760.1HNH endonuclease
XLOC_027460	XP_008813356.1probable disease resistance protein At5g45440
XLOC_027479	RVW16046.1Retrovirus-related Pol polyprotein from transposon TNT 1-94
XLOC_027482	XP_009125373.1PREDICTED: uncharacterized protein LOC103850383
XLOC_027485	EOY08149.1Starch branching enzyme 2.1 isoform 1
XLOC_027492	GAV92681.1zf-RVT domain-containing protein
XLOC_027497	PSS04744.1Disease resistance protein
XLOC_027541	YP_009342820.1hypothetical chloroplast RF1 (chloroplast)
XLOC_027542	YP_009342820.1hypothetical chloroplast RF1 (chloroplast)
XLOC_027581	---NA---
XLOC_027584	GBC10048.1hypothetical protein RclHR1_00930026
XLOC_027595	---NA---
XLOC_027600	PKU74657.1integrator complex subunit 11
XLOC_027622	QAV58386.1Ycf2 (chloroplast)
XLOC_027625	RDY14309.1 ycf68
XLOC_027631	---NA---
XLOC_027637	KRH17766.1hypothetical protein GLYMA_13G013900
XLOC_027668	PQQ19109.1putative quinone-oxidoreductase homolog chloroplastic
XLOC_027686	---NA---
XLOC_027752	RVX19584.1Aspartyl protease family protein
XLOC_027795	PSS24088.1Dihydroxy-acid dehydratase
XLOC_027834	---NA---
XLOC_027835	RVW14714.1LINE-1 retrotransposable element ORF2 protein
XLOC_027836	---NA---
XLOC_027890	EOY34480.1Vacuolar protein sorting-associated protein 24 isoform 1
XLOC_027920	PSS10062.1Calcium-binding protein
XLOC_027940	---NA---
XLOC_028045	---NA---
XLOC_028079	RVW64757.1Transposon Ty3-I Gag-Pol polyprotein
XLOC_028090	---NA---
XLOC_028106	PSR95591.1Cell differentiation protein
XLOC_028110	RVW33721.1putative ribonuclease H protein
XLOC_028152	---NA---
XLOC_028197	RVW50129.1Retrovirus-related Pol polyprotein from transposon RE1
XLOC_028216	KYP34423.1Retrovirus-related Pol polyprotein LINE-1
XLOC_028232	OMO97829.16-phosphogluconolactonase, DevB-type
XLOC_028271	---NA---
XLOC_028419	PSS23857.1CASP-like protein
XLOC_028443	---NA---
XLOC_028460	RWR94899.1ataxia telangiectasia mutated family protein
XLOC_028471	AFN88207.1integrase core domain containing protein
XLOC_028541	PSS21150.1Transcription factor bHLH60 like
XLOC_028558	---NA---
XLOC_028617	PSR85429.1Estrogen receptor beta like
XLOC_028638	XP_017973643.1 deSI-like protein At4g17486
XLOC_028712	PSS10261.1Ammonium transporter 1 member like
XLOC_028713	PSS31216.1Serine/threonine-protein kinase
XLOC_028717	OMO64389.1hypothetical protein CCACVL1_21795
XLOC_028732	RVW39723.1LINE-1 reverse transcriptase-like
XLOC_028839	XP_018827493.1PREDICTED: uncharacterized protein LOC108996178
XLOC_028872	PSS13972.1F-box protein
XLOC_028925	PSR85388.1Premnaspirodiene oxygenase
XLOC_028971	PSS33834.1Stem-specific protein
XLOC_028972	PSS16002.1Perakine reductase
XLOC_029003	RVW74302.1Protein NRT1/ PTR family 8.3
XLOC_029013	---NA---
XLOC_029024	OVA19040.1Basic-leucine zipper domain
XLOC_029044	PSS31815.17-deoxyloganetin glucosyltransferase
XLOC_029110	PSS33446.150S ribosomal protein
XLOC_029133	PSR91260.1Aquaporin TIP4-1 like
XLOC_029156	PSR97981.1GTPase
XLOC_029161	XP_017232180.1 two-component response regulator-like APRR5
XLOC_029176	PSS26076.1Cytochrome P450 82C2 like
XLOC_029195	PKA61678.1putative mitochondrial protein
XLOC_029243	PSS09361.1Protein kinase
XLOC_029248	PSS09360.1Tegument protein
XLOC_029282	PSS08107.1CBL-interacting serine/threonine-protein kinase
XLOC_029283	PSS08107.1CBL-interacting serine/threonine-protein kinase
XLOC_029312	XP_009368036.1 alpha-N-acetylglucosaminidase
XLOC_029354	OVA07970.1tRNA transferase Trm5/Tyw2
XLOC_029383	XP_007035179.1 probable plastid-lipid-associated protein 6, chloroplastic
XLOC_029408	PSS00178.1Immune-associated nucleotide-binding protein
XLOC_029439	PSS11937.1Glucan endo-1,3-beta-glucosidase
XLOC_029541	PSR95069.1Laccase-4 like
XLOC_029600	XP_019256978.1 putative clathrin assembly protein At4g40080
XLOC_029635	OMO82495.1Cytochrome P450
XLOC_029745	XP_003634371.1 bifunctional nuclease 2
XLOC_029770	XP_023874889.1uncharacterized protein LOC111987399
XLOC_029785	PSS13996.1Cytochrome P450 704C1 like
XLOC_029804	XP_010655735.1 serine/threonine-protein phosphatase 6 regulatory subunit 2 isoform X1
XLOC_029844	---NA---
XLOC_029853	OTG34130.1putative reverse transcriptase domain, Zinc finger, CCHC-type, Aspartic peptidase domain protein
XLOC_029995	OMO72261.1Autophagy protein Atg8 ubiquitin-like protein
XLOC_030190	XP_008226277.1 UDP-glycosyltransferase 86A2
XLOC_030201	---NA---
XLOC_030202	PSS17324.1Glutamyl-tRNA reductase
XLOC_030219	PSR99900.1Cyclic pyranopterin monophosphate synthase
XLOC_030264	PSS29034.1Heat stress transcription factor A-4a like
XLOC_030281	PSR98346.1Activating molecule in BECN1-regulated autophagy protein
XLOC_030337	ADR74193.1 (E)-beta-caryophyllene synthase
XLOC_030369	PSS13736.1Nudix hydrolase
XLOC_030371	PSR84600.1Protein NRT1/ PTR FAMILY 6.1 like
XLOC_030413	KYP34423.1Retrovirus-related Pol polyprotein LINE-1
XLOC_030420	---NA---
XLOC_030443	PSR87748.1Protein ORANGE-ORANGE like
XLOC_030445	PSS30533.1Cytochrome P450 85A1 like
XLOC_030454	XP_027116618.1mitochondrial substrate carrier family protein ucpB-like isoform X3
XLOC_030460	XP_002279679.1 probable calcium-binding protein CML23
XLOC_030531	PSR87706.1Pentatricopeptide repeat-containing protein
XLOC_030555	PSS21254.1Cytochrome P450 81E8 like
XLOC_030557	PSR98803.1Receptor-like protein
XLOC_030629	XP_024194520.1LEAF RUST 10 DISEASE-RESISTANCE LOCUS RECEPTOR-LIKE PROTEIN KINASE-like 1.1 isoform X1
XLOC_030639	RVW55733.1 Ethylene-responsive transcription factor ERF086
XLOC_030700	PSS29238.1K(+) efflux antiporter 3 like
XLOC_030717	XP_011089189.1transcription factor RAX2
XLOC_030729	PSS04444.1Glutamate synthase 1 [NADH] like
XLOC_030759	---NA---
XLOC_030762	PSS02025.1Histone like
XLOC_030854	---NA---
XLOC_030857	PSS09810.1High mobility group B protein
XLOC_030884	PSS35224.1Cinnamoyl-CoA reductase-like
XLOC_031011	AIL29215.1aldehyde dehydrogenase
XLOC_031152	XP_002279792.2 protein MEI2-like 2
XLOC_031157	RVW39593.1Protein MEI2-like 2
XLOC_031171	AHE93347.1sucrose phosphate synthase 1
XLOC_031178	PSS34360.1Pectinesterase inhibitor domain protein
XLOC_031208	XP_017973379.1 mitogen-activated protein kinase 9 isoform X1
XLOC_031209	XP_006451653.1mitogen-activated protein kinase 9
XLOC_031247	XP_010668985.1 putative F-box/kelch-repeat protein At4g12810
XLOC_031274	PSS24639.1Ubiquitin-conjugating enzyme E2 24
XLOC_031276	PSS04784.1Callose synthase
XLOC_031278	RVW12382.1Transposon Ty3-I Gag-Pol polyprotein
XLOC_031295	AZL19383.1transcription factor mTERF2
XLOC_031336	PSR87690.1Pentatricopeptide repeat-containing protein
XLOC_031337	---NA---
XLOC_031359	PSR84761.1Calmodulin-binding transcription activator like
XLOC_031410	---NA---
XLOC_031411	---NA---
XLOC_031429	PSS00480.1Protein kinase-like domain protein
XLOC_031434	PSS26785.1Myosin-binding protein
XLOC_031437	PSS30044.1Transmembrane protein like
XLOC_031444	XP_023760873.1probable beta-D-xylosidase 7
XLOC_031500	PSS31876.1Zinc finger CCCH domain-containing protein
XLOC_031560	XP_002323765.1F-box/LRR-repeat protein 14
XLOC_031641	PSS07518.1E3 ubiquitin-protein like
XLOC_031650	PSR87659.1MDIS1-interacting receptor like kinase
XLOC_031652	PSR86377.1Serine/threonine-protein kinase
XLOC_031669	---NA---
XLOC_031677	PSR96356.1LanC-like protein
XLOC_031698	PSS07378.1PiRNA biogenesis protein
XLOC_031702	XP_002511494.2AAA-ATPase ASD, mitochondrial
XLOC_031708	PSR95835.1Protein NUCLEAR FUSION DEFECTIVE like
XLOC_031820	---NA---
XLOC_031855	PSR93204.1Serine/threonine-protein kinase dyrk2
XLOC_031872	XP_020227850.1ankyrin repeat-containing protein At5g02620
XLOC_031886	RVW49770.1B3 domain-containing protein
XLOC_031922	PSS33643.1Cytochrome P450 85A1 like
XLOC_031928	XP_021674254.1gibberellin 3-beta-dioxygenase 3-like
XLOC_031953	---NA---
XLOC_031997	XP_023895459.12-alkenal reductase (NADP(+)-dependent)-like
XLOC_032033	XP_002265171.1 pectinesterase
XLOC_032080	RWR88474.1putative E3 ubiquitin-protein ligase RHC2A
XLOC_032109	---NA---
XLOC_032132	PSR93066.1Exocyst complex component EXO70A1 like
XLOC_032191	RVW54646.1Retrovirus-related Pol polyprotein from transposon TNT 1-94
XLOC_032192	RVW53095.1Retrovirus-related Pol polyprotein from transposon TNT 1-94
XLOC_032220	XP_017217053.1 calcium-binding protein KIC-like
XLOC_032406	PSS11381.1Golgin candidate like
XLOC_032457	XP_015871729.1ribonuclease 3-like protein 1
XLOC_032509	PSS28982.1ABC transporter B family member 9 like
XLOC_032545	XP_011078771.1polypyrimidine tract-binding protein homolog 3
XLOC_032556	PSR86583.1Phenylalanine ammonia-lyase
XLOC_032580	RVW84538.1Retrovirus-related Pol polyprotein from transposon TNT 1-94
XLOC_032581	RVX21645.1Retrovirus-related Pol polyprotein from transposon RE1
XLOC_032582	RVW77862.1Retrovirus-related Pol polyprotein from transposon TNT 1-94
XLOC_032588	PSR92731.1FRIGIDA-like protein
XLOC_032606	XP_002272712.1 protein AAR2 homolog isoform X2
XLOC_032632	AEL30371.1TIR-NBS-LRR type disease resistance protein
XLOC_032649	AYA60135.1putative polyamine transporter At3g19553
XLOC_032674	XP_002269322.1PREDICTED: uncharacterized protein At4g22758
XLOC_032714	KHF97388.1 putative yacP
XLOC_032758	RVW24579.11-aminocyclopropane-1-carboxylate oxidase-like 1
XLOC_032813	KYP34423.1Retrovirus-related Pol polyprotein LINE-1
XLOC_032852	PSS10349.1Bifunctional pectinesterase 18/rRNA N-glycosylase
XLOC_032878	PSS23891.1Reverse transcriptase/Ribonuclease
XLOC_032886	XP_008240500.1 beta-glucosidase BoGH3B-like isoform X1
XLOC_032972	PSS11952.15-hydroxyisourate hydrolase like isoform 1
XLOC_032990	PSS10111.1Protein IQ-DOMAIN like
XLOC_033041	PSS29219.1Receptor protein kinase
XLOC_033058	XP_010664425.1 GATA transcription factor 24 isoform X2
XLOC_033158	PSS10155.1Cation/H(+) antiporter like
XLOC_033291	---NA---
XLOC_033367	---NA---
XLOC_033379	PSS11502.1Pectinesterase inhibitor domain protein
XLOC_033391	PSR90057.1Sec14 cytosolic factor like
XLOC_033450	XP_002283532.2 heat shock cognate 70 kDa protein 2
XLOC_033461	ARU79082.1beta-glucosidase 4 GH3 family
XLOC_033485	XP_016500822.1 ribosomal protein S4, mitochondrial
XLOC_033611	XP_009589243.1 probable 6-phosphogluconolactonase 4, chloroplastic isoform X2
XLOC_033651	PSS21525.1Retrotransposon-like protein
XLOC_033664	PSR89993.1E3 ubiquitin-protein like
XLOC_033717	PSR93287.1Protein ORANGE-GREEN like
XLOC_033772	PSR89612.1Protein EDS1L like
XLOC_033849	PSS36126.1Pyrophosphate-energized vacuolar membrane proton pump like
XLOC_033854	PSS02973.1Subtilisin-like protease
XLOC_033858	AHB17746.1GA repressor DELLA
XLOC_033863	RWR88474.1putative E3 ubiquitin-protein ligase RHC2A
XLOC_033900	PSR84638.1TRNA wybutosine-synthesizing protein like
XLOC_033911	PSS15811.1FH protein interacting protein
XLOC_033928	PSR99966.1Von Willebrand factor, type A protein
XLOC_033953	PIN12419.1Non-specific protein-tyrosine kinase
XLOC_033991	XP_022728001.1cyclic dof factor 3-like
XLOC_034031	XP_010089121.1probable copper-transporting ATPase HMA5
XLOC_034036	KZV32906.1C-type mannose receptor 2
XLOC_034083	XP_021679836.1protein ACCELERATED CELL DEATH 6-like
XLOC_034102	XP_017219526.1 protein DA1-related 1
XLOC_034135	PSS09948.1Dentin sialoprotein
XLOC_034190	RVW68686.1G-type lectin S-receptor-like serine/threonine-protein kinase
XLOC_034316	PSS13711.1Lipopolysaccharide-induced tumor necrosis factor-alpha factor like
XLOC_034322	KVH91991.1Reverse transcriptase zinc-binding domain-containing protein
XLOC_034414	EOY23266.1Hydroxyproline-rich glycoprotein family protein isoform 1
XLOC_034431	XP_023895206.1anthocyanidin 3-O-glucosyltransferase 5-like
XLOC_034432	PSS17216.1NEDD8-conjugating enzyme Ubc12 like
XLOC_034449	OIT34550.1putative ubiquitin-like-specific protease 2b
XLOC_034491	PSS01252.1Protein indeterminate-domain like
XLOC_034507	---NA---
XLOC_034509	---NA---
XLOC_034510	PSS04772.1Lipid-phosphate phosphatase
XLOC_034578	XP_012067968.114-3-3-like protein GF14 kappa
XLOC_034617	PHT60200.1Clustered mitochondria protein
XLOC_034649	PSS21436.1E3 ubiquitin-protein like
XLOC_034662	PSR98544.1Disease resistance protein
XLOC_034754	PSS04638.1S-adenosylmethionine mitochondrial carrier protein
XLOC_034769	XP_015893907.1alpha-mannosidase At3g26720-like
XLOC_034816	OMP07890.1Ketose-bisphosphate aldolase, class-II
XLOC_034905	PHU23847.1Nucleobase-ascorbate transporter 8
XLOC_034988	XP_022887693.1transcription initiation factor IIB-2-like
XLOC_034996	RVX12659.1Rust resistance kinase Lr10
XLOC_035093	PSS07250.1Trihelix transcription factor
XLOC_035133	XP_027086411.1zinc finger protein BALDIBIS-like isoform X1
XLOC_035172	XP_022898568.1chlorophyll a-b binding protein 37, chloroplastic
XLOC_035185	---NA---
XLOC_035201	XP_011076015.1cyclic nucleotide-gated ion channel 1
XLOC_035230	AOY34426.1transcription factor BHLH055
XLOC_035257	XP_002281033.1 BEL1-like homeodomain protein 11
XLOC_035269	XP_021621162.1signal recognition particle 54 kDa protein, chloroplastic isoform X1
XLOC_035270	XP_021660278.1uncharacterized GPI-anchored protein At4g28100-like
XLOC_035271	PSS30039.1Rhamnogalacturonate lyase
XLOC_035329	XP_011027642.1 transposon Ty3-G Gag-Pol polyprotein
XLOC_035496	XP_006380310.1MYB-like transcription factor ETC3
XLOC_035564	PSR98246.1F-box protein
XLOC_035579	PSS17786.1Dihydrofolate reductase
XLOC_035631	PSS02668.1Aspartokinase
XLOC_035732	RVW35277.1Retrovirus-related Pol polyprotein from transposon TNT 1-94
XLOC_035810	PSS24694.1Protein TRANSPORT INHIBITOR RESPONSE like
XLOC_035833	AQL03708.1Retrovirus-related Pol polyprotein LINE-1
XLOC_035863	RVX17860.1Transposon TX1 uncharacterized 149 kDa protein
XLOC_035873	PSR88183.1Calcium-transporting ATPase like
XLOC_035917	PSS23885.1Mannan endo-1,4-beta-mannosidase
XLOC_035919	OMO88462.1Ubiquitin-conjugating enzyme, E2
XLOC_035937	PSS26086.1Conglutinin like
XLOC_035977	---NA---
XLOC_035982	XP_002279230.2 homeobox protein BEL1 homolog
XLOC_036002	XP_021888631.1zonadhesin-like isoform X2
XLOC_036009	RVW47582.1ABC transporter G family member 39
XLOC_036054	---NA---
XLOC_036077	---NA---
XLOC_036086	XP_024444997.1rust resistance kinase Lr10 isoform X2
XLOC_036091	PSR99551.1hypothetical protein CEY00_Acc23525
XLOC_036110	RVX02877.1Transposon TX1 uncharacterized 149 kDa protein
XLOC_036152	RVW55684.1Protein DMP2
XLOC_036190	RVX11927.1Retrovirus-related Pol polyprotein from transposon TNT 1-94
XLOC_036193	---NA---
XLOC_036195	PSS08222.1GPI mannosyltransferase
XLOC_036227	XP_011026110.1PREDICTED: uncharacterized protein LOC105126812
XLOC_036230	RVW28424.1Retrovirus-related Pol polyprotein from transposon RE1
XLOC_036300	XP_027078582.1uncharacterized protein LOC113701895 isoform X1
XLOC_036309	XP_021276134.1 dehydration-responsive element-binding protein 3-like
XLOC_036369	XP_021833051.1tetratricopeptide repeat protein 38
XLOC_036433	PSR97956.1Electron transfer flavoprotein subunit beta like
XLOC_036435	XP_022775734.1transcription factor CPC-like
XLOC_036451	PSS04772.1Lipid-phosphate phosphatase
XLOC_036490	---NA---
XLOC_036501	XP_021663578.1receptor homology region, transmembrane domain- and RING domain-containing protein 2-like
XLOC_036539	XP_008222357.1 GEM-like protein 5
XLOC_036693	PSS04605.1Cytochrome P450 89A2 like
XLOC_036697	RVW33465.1Retrovirus-related Pol polyprotein from transposon RE2
XLOC_036847	XP_009769835.1 serine/threonine-protein kinase-like protein CCR1 isoform X1
XLOC_036850	PSR98169.1Leucine-rich repeat extensin-like protein
XLOC_036862	PSS11091.1Urease accessory protein like
XLOC_036882	XP_006422259.1zinc transporter 1
XLOC_036905	XP_002264416.2 cyclic nucleotide-gated ion channel 17
XLOC_037103	XP_002266720.1 nicotinamidase 1
XLOC_037142	PSS07743.1Legume lectin domain protein
XLOC_037144	PSR89465.1Legume lectin domain protein
XLOC_037155	---NA---
XLOC_037156	KYP74314.1Retrovirus-related Pol polyprotein from transposon TNT 1-94
XLOC_037244	---NA---
XLOC_037245	---NA---
XLOC_037278	XP_012834065.1 protein RADIALIS-like 3
XLOC_037299	---NA---
XLOC_037305	XP_002277937.1 putative axial regulator YABBY 2 isoform X2
XLOC_037338	ATC41982.1transcription factor MYB5b
XLOC_037341	PSR87727.1Exocyst complex component EXO70B1 like
XLOC_037342	RVW27599.1putative Myb family transcription factor
XLOC_037376	XP_018628968.1 CENP-B homolog protein 2-like
XLOC_037377	---NA---
XLOC_037394	PSS26691.1Spatacsin like
XLOC_037407	PSS14253.1WD40 repeat protein
XLOC_037447	PSR92471.1Inactive DNA (cytosine-5)-methyltransferase DRM3
XLOC_037451	PSR97853.1Methyltransferase-like protein
XLOC_037475	PSS11952.15-hydroxyisourate hydrolase like isoform 1
XLOC_037482	PSS33361.1Optomotor-blind protein
XLOC_037487	RVW33792.1Heat shock cognate 70 kDa protein
XLOC_037514	PSR92797.1Pentatricopeptide repeat-containing protein
XLOC_037590	XP_023873933.1short-chain dehydrogenase TIC 32, chloroplastic
XLOC_037657	---NA---
XLOC_037658	PSS36639.1Methyltransferase PMT21
XLOC_037773	PSS06356.1ETO1-like protein
XLOC_037848	PSR89510.1Cyclin-dependent kinase
XLOC_037857	RVW17806.1Retrovirus-related Pol polyprotein from transposon RE1
XLOC_037960	XP_018847001.1 UDP-glycosyltransferase 86A2
XLOC_037964	EOY34457.1UDP-Glycosyltransferase superfamily protein
XLOC_037974	XP_015902364.1GATA transcription factor 9-like
XLOC_038016	PSR89663.1E3 ubiquitin ligase SUD1
XLOC_038028	XP_022741713.1ganglioside-induced differentiation-associated protein 2-like
XLOC_038101	GAO47202.1hypothetical protein G7K_1412-t1
XLOC_038163	RVW71744.1Retrovirus-related Pol polyprotein from transposon TNT 1-94
XLOC_038236	PSS26075.1Serine/threonine-protein kinase
XLOC_038246	---NA---
XLOC_038260	PSS01251.1G-type lectin S-receptor-like serine/threonine-protein kinase
XLOC_038316	AVZ45845.1zeaxanthin epoxidase
XLOC_038377	PSR98904.1Ubiquitin-conjugating enzyme like
XLOC_038417	AAU89742.1serine/threonine protein kinase-like
XLOC_038445	XP_010916037.1 OPA3-like protein
XLOC_038493	PSS03155.1hypothetical protein CEY00_Acc21538
XLOC_038538	RVX23459.1Retrovirus-related Pol polyprotein from transposon TNT 1-94
XLOC_038545	XP_009757992.1 MLO-like protein 1
XLOC_038575	AOR05812.1beta-galactosidase 7
XLOC_038594	ANN22408.1purple acid phosphatase 18
XLOC_038595	ADO34791.1beta-galactosidase STBG6
XLOC_038630	PSR87527.1Succinate dehydrogenase [ubiquinone] iron-sulfur subunit 2 like
XLOC_038695	PKA47469.1Retrovirus-related Pol polyprotein from transposon TNT 1-94
XLOC_038700	XP_023765903.1protein NDR1-like
XLOC_038802	PSR91681.1GATA transcription factor
XLOC_038852	KYP56875.1Retrovirus-related Pol polyprotein LINE-1
XLOC_038910	PSS31422.1Protein WEAK CHLOROPLAST MOVEMENT UNDER BLUE LIGHT 1 like
XLOC_038993	AQU12757.1pyrroline-5-carboxylate reductase
XLOC_039002	PSS30040.1Legume lectin domain protein
XLOC_039035	PSS29304.1Triacylglycerol lipase
XLOC_039067	PSS09989.1Nuclear transcription factor Y subunit A-1 like
XLOC_039087	---NA---
XLOC_039118	---NA---
XLOC_039137	---NA---
XLOC_039160	XP_011084187.136.4 kDa proline-rich protein-like
XLOC_039163	XP_011084187.136.4 kDa proline-rich protein-like
XLOC_039224	AAW45741.1sinapyl alcohol dehydrogenase-like protein
XLOC_039231	PSR90177.1Glycoprotein-N-acetylgalactosamine 3-beta-galactosyltransferase
XLOC_039238	XP_015932175.1cyanate hydratase isoform X1
XLOC_039293	XP_010255596.1 MADS-box transcription factor 6
XLOC_039336	PSS18189.1General transcription factor IIH subunit like
XLOC_039342	---NA---
XLOC_039386	RVX18068.1Retrovirus-related Pol polyprotein from transposon RE1
XLOC_039439	XP_010111761.1homeobox-leucine zipper protein HAT5
XLOC_039455	PSS08342.1Serine-rich adhesin for platelets like
XLOC_039470	PSS14545.1Cyclin-dependent protein kinase
XLOC_039481	PSS30359.1ABC transporter B family member 26 like
XLOC_039554	PSS18111.1Atrial natriuretic peptide receptor 3 like
XLOC_039573	---NA---
XLOC_039604	RVW39635.1Retrovirus-related Pol polyprotein from transposon RE1
XLOC_039691	PSS19388.1UPF0301 protein like
XLOC_039708	PSS31722.1Transcription factor like
XLOC_039741	PSR84636.12-oxoglutarate-dependent dioxygenase
XLOC_039765	---NA---
XLOC_039803	XP_024041675.1uncharacterized protein LOC112098950
XLOC_039867	PSR85159.1Inactive beta-amylase
XLOC_039902	PSS19702.1Thyroid receptor-interacting protein like
XLOC_039982	XP_021658677.1TMV resistance protein N-like isoform X1
XLOC_040003	---NA---
XLOC_040022	PSR89210.1hypothetical protein CEY00_Acc29408
XLOC_040150	XP_027097338.1piezo-type mechanosensitive ion channel homolog isoform X1
XLOC_040155	RVW96972.1Retrovirus-related Pol polyprotein from transposon RE2
XLOC_040156	RVW80368.1Retrovirus-related Pol polyprotein from transposon TNT 1-94
XLOC_040158	RVW94843.1Retrovirus-related Pol polyprotein from transposon TNT 1-94
XLOC_040194	RVX05052.1Myb family transcription factor PHL7
XLOC_040241	XP_006345338.1 probable acyl-activating enzyme 17, peroxisomal
XLOC_040247	XP_018831634.1PREDICTED: uncharacterized protein LOC108999235
XLOC_040250	PON52400.1Small heat shock protein HSP
XLOC_040253	EOY18623.1Uncharacterized protein TCM_043123
XLOC_040279	PON36145.1Transmembrane protein
XLOC_040322	PSS06030.1Inactive beta-amylase
XLOC_040342	PSS06032.1Nuclear transcription factor Y subunit B-10 like
XLOC_040384	RVW88812.1Retrovirus-related Pol polyprotein from transposon RE1
XLOC_040415	PSS33584.1DNA ligase
XLOC_040489	---NA---
XLOC_040502	PSR86047.1Arginine-glutamic acid dipeptide repeats protein
XLOC_040517	---NA---
XLOC_040621	---NA---
XLOC_040651	PSS30008.1Cation/H(+) antiporter like
XLOC_040709	XP_027182285.1probable pectate lyase 8
XLOC_040722	PSR96993.17-dehydrocholesterol reductase
XLOC_040776	---NA---
XLOC_040788	PSS14598.1Protein NETWORKED 1D like
XLOC_040875	OTG14229.1putative C1-like protein
XLOC_040902	---NA---
XLOC_040956	PSS36509.1Mitogen-activated protein kinase
XLOC_040968	PSS01619.1Receptor-like kinase
XLOC_040971	PSR98895.1Von Willebrand factor, type A protein
XLOC_040991	XP_006480565.1two-component response regulator-like APRR7
XLOC_041027	PSS26863.1Peptidyl-prolyl cis-trans isomerase FKBP4, N-terminally processed like
XLOC_041113	PSR95881.1Heme-binding protein like
XLOC_041184	---NA---
XLOC_041200	XP_011083533.1protein PGR
XLOC_041228	XP_010656082.1 probable E3 ubiquitin-protein ligase RNF144A-B
XLOC_041314	XP_020411583.1transcription termination factor MTEF1, chloroplastic
XLOC_041502	PSS26686.1Serine/threonine-protein kinase
XLOC_041521	XP_002275955.2 B3 domain-containing protein At2g36080
XLOC_041543	EOY08376.1DNA/RNA polymerases superfamily protein
XLOC_041544	---NA---
XLOC_041567	PSR93020.1RNA pseudouridine synthase
XLOC_041581	PSS07669.1Protein SHOOT GRAVITROPISM like
XLOC_041618	XP_018844619.1 homeobox-leucine zipper protein HAT22-like
XLOC_041670	---NA---
XLOC_041689	PSR86302.1RNA-directed RNA polymerase
XLOC_041690	PSR86303.1Sodium/metabolite cotransporter like
XLOC_041754	---NA---
XLOC_041759	---NA---
XLOC_041764	PSS07978.1Phosphoserine phosphatase
XLOC_041765	PSR96606.1Protein POLAR LOCALIZATION DURING ASYMMETRIC DIVISION AND REDISTRIBUTION like
XLOC_041904	XP_021663652.1putative disease resistance RPP13-like protein 1
XLOC_041908	PSS11943.1Disease resistance RPP13-like protein
XLOC_041962	PSS08311.1Transcription factor like
XLOC_041992	PKA50536.1ataxia telangiectasia mutated family protein
XLOC_042203	PSR85395.1Nuclear transcription factor Y subunit B-3 like
XLOC_042227	PSS11769.1Glucan endo-1,3-beta-glucosidase
XLOC_042247	PSS31503.1Dentin sialoprotein
XLOC_042278	RVW42679.1Retrovirus-related Pol polyprotein from transposon RE2
XLOC_042322	---NA---
XLOC_042377	KYP72049.1Retrovirus-related Pol polyprotein from transposon TNT 1-94
XLOC_042444	XP_002284043.1 probable esterase KAI2
XLOC_042461	PSS33330.1Pleckstriny domain-containing protein
XLOC_042462	PSS36466.1F-box protein
XLOC_042465	RVW80311.1putative ribonuclease H protein
XLOC_042467	PWA91738.12-oxoglutarate (2OG) and Fe(II)-dependent oxygenase superfamily protein
XLOC_042541	PSS32374.1Receptor-like protein kinase
XLOC_042550	XP_012436100.1 cytochrome c oxidase subunit 2
XLOC_042571	PSS21456.1Secoisolariciresinol dehydrogenase
XLOC_042593	YP_009049759.1cytochrome c maturation protein CcmB (mitochondrion)
XLOC_042602	PSR90245.1Transmembrane protein like
XLOC_042663	PSR99694.1Mediator of RNA polymerase II transcription subunit like
XLOC_042703	---NA---
XLOC_042725	PSR95789.1Formin-like protein
XLOC_042784	OTF84705.1putative NADH-ubiquinone oxidoreductase chain 4 (mitochondrion)
XLOC_042803	---NA---
XLOC_042816	KRH17766.1hypothetical protein GLYMA_13G013900
XLOC_042829	EOY29225.1 Methionyl-tRNA synthetase
XLOC_042851	KRH17766.1hypothetical protein GLYMA_13G013900
XLOC_042870	KRH17766.1hypothetical protein GLYMA_13G013900
XLOC_042897	---NA---
XLOC_042899	---NA---
XLOC_042913	OMO94091.1reverse transcriptase
XLOC_042918	XP_002282578.1 zinc finger protein CONSTANS-LIKE 16
XLOC_042921	XP_018810584.1 1,4-alpha-glucan-branching enzyme 1, chloroplastic/amyloplastic-like
XLOC_042943	RVW38446.1Ubiquitin carboxyl-terminal hydrolase 12
XLOC_042944	XP_021677233.1GRF1-interacting factor 1-like
XLOC_042988	PSS13438.1Leaf rust 10 disease-resistance locus receptor-like protein kinase
XLOC_043013	ONH96822.1hypothetical protein PRUPE_7G154100
XLOC_043016	ONH96822.1hypothetical protein PRUPE_7G154100
XLOC_043024	---NA---
XLOC_043067	PSR99909.1Strigolactone esterase
XLOC_043081	AHE93341.1sucrose non-fermenting 1
XLOC_043144	PSS31298.1Cysteine protease
XLOC_043187	---NA---
XLOC_043323	PSS19434.1MDIS1-interacting receptor like kinase
XLOC_043333	PNX95208.1retrovirus-related Pol polyprotein from transposon TNT 1-94
XLOC_043341	PSS16229.1Disease resistance protein
XLOC_043350	XP_023919490.1probable alpha-mannosidase At5g13980
XLOC_043355	RVX22943.1Transcription factor RF2b
XLOC_043412	XP_010656764.1 subtilisin-like protease SBT2.5 isoform X1
XLOC_043444	RVW93541.1Transposon Ty3-I Gag-Pol polyprotein
XLOC_043485	PSS29162.1Phosphatidylinositol 4-phosphate 5-kinase
XLOC_043500	PSS36453.1Xaa-Pro aminopeptidase
XLOC_043540	XP_002276328.2 EID1-like F-box protein 3
XLOC_043585	XP_022897120.1LRR receptor-like serine/threonine-protein kinase
XLOC_043645	PSS01114.1E3 ubiquitin-protein like
XLOC_043677	---NA---
XLOC_043727	XP_010262044.1 casein kinase 1-like protein 2
XLOC_043747	PSR85254.1Starch synthase 4/amyloplastic precursor
XLOC_043795	RVW45602.1LINE-1 reverse transcriptase-like
XLOC_043914	XP_023769221.1cytochrome P450 CYP749A22-like
XLOC_043917	EOY02633.1Transcription factor bHLH61 isoform 2
XLOC_043923	PSR93134.1Protein phosphatase
XLOC_043937	KYP66082.1Glycine-rich RNA-binding protein GRP1A
XLOC_043952	PSS31337.1Sugar transporter ERD6-like
XLOC_043985	PSS16073.1Ribulose-1,5 bisphosphate carboxylase/oxygenase large subunit N-methyltransferase
XLOC_043996	RVX08752.1Nodulation receptor kinase
XLOC_044024	AEL30371.1TIR-NBS-LRR type disease resistance protein
XLOC_044077	---NA---
XLOC_044078	ABD19073.1reverse transcriptase
XLOC_044079	RVW43546.1Retrovirus-related Pol polyprotein from transposon TNT 1-94
XLOC_044098	PSS13857.1Transmembrane protein
XLOC_044109	PSS07931.1DnaJ subfamily C member 10 like
XLOC_044220	AFV96171.1ubiquitin conjugating enzyme S
XLOC_044241	PSR93411.1E3 ubiquitin ligase BIG BROTHER like
XLOC_044357	PSS04340.1AT-hook motif nuclear-localized protein
XLOC_044414	PSS07260.1Glutamate receptor 2.8 like
XLOC_044477	XP_019253835.1 protein MARD1
XLOC_044483	XP_027076440.1UDP-glycosyltransferase 91A1-like
XLOC_044492	PSS21296.1Glucose-induced degradation protein
XLOC_044507	PSR95771.13-dehydroquinate synthase
XLOC_044508	ANN22406.1purple acid phosphatase 1
XLOC_044563	---NA---
XLOC_044579	XP_016510725.1 PHD finger protein ALFIN-LIKE 4-like
XLOC_044628	PSR94716.1Universal stress protein
XLOC_044667	XP_009774399.1 probable inactive purple acid phosphatase 27
XLOC_044669	PSR89553.1Exocyst complex component EXO70B1 like
XLOC_044696	XP_002271631.1 GDSL esterase/lipase 5
XLOC_044698	XP_019081365.1 rust resistance kinase Lr10-like isoform X1
XLOC_044776	---NA---
XLOC_044816	XP_021657923.1NAC transcription factor 25-like
XLOC_044828	XP_002304380.1ubiquitin carboxyl-terminal hydrolase 12
XLOC_044829	PSS19259.1Callose synthase
XLOC_044836	PSS14338.1Fasciclin-like arabinogalactan protein
XLOC_044853	KJB27454.1hypothetical protein B456_005G064600
XLOC_044882	XP_027090370.16-phosphofructo-2-kinase/fructose-2,6-bisphosphatase isoform X2
XLOC_044904	---NA---
XLOC_044936	---NA---
XLOC_044998	PSS14378.1LRR receptor-like serine/threonine-protein kinase
XLOC_045032	---NA---
XLOC_045065	---NA---
XLOC_045082	PSR91353.1ABC transporter G family member 14 like
XLOC_045131	XP_027339404.1BRASSINOSTEROID INSENSITIVE 1-associated receptor kinase 1 isoform X3
XLOC_045192	PSS33214.1Ethylene-responsive transcription factor 5 like
XLOC_045209	PSS28768.1Isopentenyl phosphate kinase
XLOC_045212	PKA61482.1putative mitochondrial protein
XLOC_045213	OMO98613.1reverse transcriptase
XLOC_045217	PSR91806.1Polyadenylate-binding protein
XLOC_045218	PSR91806.1Polyadenylate-binding protein
XLOC_045255	PSS04993.1Uricase-2 isozyme like
XLOC_045265	PSS31658.1Low affinity sulfate transporter like
XLOC_045305	PSS16126.1Drug/metabolite transporter protein
XLOC_045329	PSS28546.1NDR1/HIN1-Like protein
XLOC_045393	---NA---
XLOC_045539	---NA---
XLOC_045595	---NA---
XLOC_045606	PSS14516.1Large tegument protein like
XLOC_045692	---NA---
XLOC_045707	PSS20804.1Receptor-like serine/threonine-protein kinase
XLOC_045709	XP_022879686.1receptor-like serine/threonine-protein kinase ALE2
XLOC_045726	PSS24347.1F-box protein
XLOC_045729	PSS24347.1F-box protein
XLOC_045735	XP_017970366.1 LRR receptor-like serine/threonine-protein kinase GSO1
XLOC_045821	---NA---
XLOC_045824	PSR99534.1Alcohol dehydrogenase-like
XLOC_045833	PSR85288.1WRKY transcription factor
XLOC_045876	PSS32911.1Potassium voltage-gated channel subfamily H member 3 like
XLOC_045932	---NA---
XLOC_045936	---NA---
XLOC_046015	PSR98257.1Membrane-associated protein like
XLOC_046023	ADU25490.1tonoplastic intrinsic protein
XLOC_046028	PSS04620.1Aquaporin TIP1-1 like
XLOC_046061	XP_021607631.1receptor-like protein 12
XLOC_046127	XP_009356755.1 adenylate isopentenyltransferase 3, chloroplastic
XLOC_046128	XP_019247748.1 zinc finger protein 827-like
XLOC_046165	PSS23640.1Pectate lyase
XLOC_046184	AUD40396.1protein phosphatase 2C
XLOC_046241	PSS32468.1Synaptotagmin-4 like
XLOC_046251	PSS01056.1Aspartyl protease family protein
XLOC_046288	GBC10048.1hypothetical protein RclHR1_00930026
XLOC_046293	PSS14438.1B-box domain protein
XLOC_046296	XP_023889530.1G-type lectin S-receptor-like serine/threonine-protein kinase At2g19130
XLOC_046391	PSS32932.1Sickle tail protein
XLOC_046400	RVW38016.1putative ribonuclease H protein
XLOC_046426	PSS04307.1Transcription factor like
XLOC_046448	---NA---
XLOC_046517	---NA---
XLOC_046523	PSS32733.1Alanine--glyoxylate aminotransferase 2 3 like
XLOC_046528	PSS32734.1Transcription factor bHLH61 like
XLOC_046583	RVW90585.1 Retrovirus-related Pol polyprotein from transposon TNT 1-94
XLOC_046603	PSS18063.1Protein HOTHEAD like
XLOC_046682	PSR98900.1hypothetical protein CEY00_Acc25428
XLOC_046696	XP_027087955.1extensin-like isoform X2
XLOC_046714	PSS33871.1Stem-specific protein
XLOC_046749	---NA---
XLOC_046758	PSS28910.1Berberine bridge enzyme-like
XLOC_046831	PSS28730.1Ultraviolet-B receptor like
XLOC_046862	PSS06424.1Nodulin homeobox like
XLOC_046901	PSS24769.1Protein DMR6-LIKE OXYGENASE 2 like
XLOC_046986	XP_011029537.1 ribokinase-like
XLOC_047006	EOX94044.1DNA/RNA polymerases superfamily protein
XLOC_047020	XP_022754316.1protein EMSY-LIKE 3-like isoform X1
XLOC_047049	PSS33246.1Inactive serine/threonine-protein kinase scy1
XLOC_047144	PSS31526.1Xylulose kinase
XLOC_047169	PSR84565.1E3 ubiquitin-protein like
XLOC_047327	RVW69976.1Retrovirus-related Pol polyprotein from transposon TNT 1-94
XLOC_047340	RVW45061.1Transposon Ty3-I Gag-Pol polyprotein
XLOC_047382	XP_006437675.1ubiquitin receptor RAD23d
XLOC_047416	---NA---
XLOC_047449	PSS35769.1Inactive glucose-1-phosphate adenylyltransferase small subunit 2 like
XLOC_047450	PSS36384.1UPF0307 protein like
XLOC_047514	XP_018827585.1 fumarylacetoacetase
XLOC_047557	RVW97716.1Transposon Ty3-G Gag-Pol polyprotein
XLOC_047633	PSR84844.1Carbonic anhydrase
XLOC_047663	XP_006466320.1nicotinamidase 1
XLOC_047665	PSS06463.1Alpha-1,6-mannosyl-glycoprotein like
XLOC_047685	PSS00343.1Aspartic proteinase
XLOC_047696	PSR84732.1Pyruvate dehydrogenase E1 component subunit beta-1 like
XLOC_047750	PSR96890.1U3 small nucleolar RNA-associated protein like
XLOC_047817	PSS09595.1Protein FAR1-RELATED SEQUENCE like
XLOC_047838	YP_009414452.1ATP synthase F0 subunit 6 (mitochondrion)
XLOC_047878	PSS33129.1Mitochondrial metalloendopeptidase
XLOC_047898	XP_007042911.2 phospho-2-dehydro-3-deoxyheptonate aldolase 2, chloroplastic
XLOC_047902	---NA---
XLOC_047934	PSS29074.1F-box protein
XLOC_047964	PSS19201.1Methylcrotonoyl-CoA carboxylase beta chain like
XLOC_048233	XP_007013487.2 early nodulin-like protein 2
XLOC_048237	PSR89479.1Cytochrome P450 71A8 like
XLOC_048266	PSS11974.1Protein lin-37 like
XLOC_048268	PKU79361.1integrator complex subunit 11
XLOC_048283	OTF96511.1 putative reverse transcriptase domain, Reverse transcriptase zinc-binding domain protein
XLOC_048340	XP_023905694.1receptor-like protein EIX2
