# Supplementary material for: Comparing adventitious root-formation and graft-unification abilities in clones of Argania spinosa
Source: Front Plant Sci. 2022 Nov 14;13:1002703. doi: 10.3389/fpls.2022.1002703 (PMC9702570; doi:10.3389/fpls.2022.1002703)
Supplement: Supplementary Table 6 — List of transcripts in the green zones in Figure 5 . [file Table_6.xlsx]

## Sheet: GROUP A
988 elements ARS1 specific rooting A
XLOC_000827	XP_022997951.1UDP-glucuronic acid decarboxylase 2-like
XLOC_001310	PSS30515.1Phenolic glucoside malonyltransferase
XLOC_001525	PSS20928.1Equilibrative nucleotide transporter like
XLOC_001890	XP_002279520.1 light-inducible protein CPRF2
XLOC_002553	XP_002283596.2 probable leucine-rich repeat receptor-like serine/threonine-protein kinase At3g14840
XLOC_002554	KYP34729.1Retrovirus-related Pol polyprotein from transposon TNT 1-94
XLOC_002817	---NA---
XLOC_003280	---NA---
XLOC_003286	XP_011092107.1topless-related protein 3
XLOC_003727	PSS01908.1E3 ubiquitin-protein like
XLOC_003829	PSS26845.1WAT1-related protein
XLOC_004322	XP_008340696.1 cell wall / vacuolar inhibitor of fructosidase 1-like
XLOC_005295	PSR87945.1Xyloglucan galactosyltransferase
XLOC_005507	RVX10959.1putative ribonuclease H protein
XLOC_005740	PSS29453.1E3 ubiquitin-protein like
XLOC_006026	RWR94899.1ataxia telangiectasia mutated family protein
XLOC_006179	XP_010659811.2 peroxidase 5
XLOC_006199	PSS20824.1Tetraspanin-2 like
XLOC_006669	XP_027164523.1UDP-glycosyltransferase 92A1-like
XLOC_006762	PSS33019.1Late embryogenesis abundant protein
XLOC_007116	PSS33789.11-aminocyclopropane-1-carboxylate oxidase
XLOC_007316	XP_002284018.2 probable glycosyltransferase At5g03795
XLOC_007383	PSS36486.1Phosphopantetheine adenylyltransferase
XLOC_007443	XP_020230718.1cx9C motif-containing protein 4
XLOC_007949	PSR91596.1Classical arabinogalactan protein
XLOC_008330	XP_002284345.1 BTB/POZ domain-containing protein NPY4 isoform X1
XLOC_008390	XP_023890885.1metalloendoproteinase 2-MMP-like
XLOC_008519	PSR95177.1MLO-like protein
XLOC_009018	XP_019240906.1 inactive receptor-like serine/threonine-protein kinase At2g40270
XLOC_009620	PSS24526.1TMV resistance protein like
XLOC_010037	PSS30522.1Receptor-like protein kinase
XLOC_010524	PSS26553.1RING-H2 finger protein
XLOC_011060	PON90441.1Transmembrane protein
XLOC_011209	XP_016577631.1 dof zinc finger protein DOF2.1-like
XLOC_011394	XP_012843987.1 F-box protein PP2-A13-like
XLOC_011468	KYP56875.1Retrovirus-related Pol polyprotein LINE-1
XLOC_011516	PSS17483.1Pathogen-related protein
XLOC_011685	PSS28605.1Sphingosine-1-phosphate lyase
XLOC_012174	---NA---
XLOC_012272	PSR92838.1Cytokinin riboside 5'-monophosphate phosphoribohydrolase
XLOC_012296	PSS30726.1Dammarenediol 12-hydroxylase
XLOC_012777	PSS00021.1Oxidoreductase, N-terminal protein
XLOC_012969	PSR86190.1Zinc transporter 6 like
XLOC_013275	PSS13474.1GATA zinc finger domain-containing protein
XLOC_013385	GAV79710.12OG-FeII_Oxy domain-containing protein/DIOX_N domain-containing protein
XLOC_013871	XP_009766809.1 ATP-dependent RNA helicase A
XLOC_014631	---NA---
XLOC_014743	PIN07384.1Transcription factor HEX
XLOC_014891	RVX15249.1Thioredoxin H-type
XLOC_015142	XP_012082344.1protein CREG1
XLOC_015174	PSS26876.1Signal recognition particle receptor subunit beta like
XLOC_015641	PSS33660.1AT-rich interactive domain-containing protein
XLOC_015663	XP_016899632.1 L10-interacting MYB domain-containing protein-like isoform X2
XLOC_015833	PSS14354.1U-box domain-containing protein
XLOC_015941	PSS28733.1Sphinganine C4-monooxygenase
XLOC_016054	PSS17236.1BTB/POZ domain-containing protein
XLOC_016255	PSS06338.1Auxin-induced protein like
XLOC_016332	PSS33095.1Heat stress transcription factor B-2a like
XLOC_016345	---NA---
XLOC_016379	PSS02054.1Flavin-containing monooxygenase
XLOC_016803	PSS31154.1Cinnamoyl-CoA reductase
XLOC_016999	XP_021650761.1L-type lectin-domain containing receptor kinase V.9-like
XLOC_017004	EOY07455.1Receptor lectin kinase
XLOC_017050	XP_002267870.2 probable LRR receptor-like serine/threonine-protein kinase At4g26540
XLOC_017113	PSS34431.1Transmembrane protein
XLOC_017206	PSS01739.1Microtubule-associated protein like
XLOC_017277	PSS15458.1Protein LURP-one-related like
XLOC_017671	PSR85212.1Protein SMAX1-LIKE like
XLOC_017697	PSS35246.1F-box/LRR-repeat protein
XLOC_017888	PSS21428.12-oxoglutarate-dependent dioxygenase
XLOC_018458	PSS33095.1Heat stress transcription factor B-2a like
XLOC_018690	AXY97607.1 Response to pseudomonas syringae 3
XLOC_018704	PSR92672.1Histidine-containing phosphotransfer protein
XLOC_018734	---NA---
XLOC_018746	---NA---
XLOC_018803	PON58949.1Transmembrane protein
XLOC_019102	XP_023922998.1signal recognition particle 14 kDa protein-like
XLOC_019417	XP_023880587.1probable aminotransferase ACS12
XLOC_019810	---NA---
XLOC_020211	XP_003537971.1ras-related protein Rab11C
XLOC_020431	PSR98075.1Protein SMAX1-LIKE like
XLOC_020784	---NA---
XLOC_020949	PSS07267.1Mitogen-activated protein kinase
XLOC_021195	PSR87515.1Glucose-6-phosphate 1-dehydrogenase
XLOC_021291	XP_021276774.1protein IQ-DOMAIN 14-like
XLOC_021334	GAV61922.1DUF2435 domain-containing protein/Vac14_Fig4_bd domain-containing protein/Vac14_Fab1_bd domain-containing protein
XLOC_021381	PWA45395.1Ribosomal protein L33
XLOC_021800	PSS04719.1NDR1/HIN1-Like protein
XLOC_021869	PSS16441.1Glutaredoxin-C9 like
XLOC_021887	PON71376.1Pyrophosphate-dependent phosphofructokinase TP0108-type
XLOC_021999	---NA---
XLOC_022124	ADZ28517.1neoxanthin synthase
XLOC_022419	PSR91146.1Cysteine--tRNA ligase
XLOC_022465	---NA---
XLOC_022505	XP_002282125.1 putative receptor protein kinase ZmPK1
XLOC_023205	XP_010037776.1 probable glutathione S-transferase
XLOC_023275	---NA---
XLOC_023626	XP_024023110.1GTP-binding nuclear protein Ran-3
XLOC_023755	PSS00219.1Mediator of RNA polymerase II transcription subunit like
XLOC_023888	PSS31419.1Calcium-binding protein CML10
XLOC_024005	XP_012436092.1 4-hydroxy-3-methylbut-2-enyl diphosphate reductase, chloroplastic-like
XLOC_024215	AGT37413.2anthocyanin 5-aromatic acyltransferase
XLOC_024391	XP_018811096.1 protein CHUP1, chloroplastic
XLOC_024451	PSS11166.1LRR receptor-like serine/threonine-protein kinase precursor
XLOC_024475	PSS33281.1Cytosolic endo-beta-N-acetylglucosaminidase
XLOC_024613	PSR98598.1Protein NUCLEAR FUSION DEFECTIVE 6 like
XLOC_024690	PSS15461.1Serine/threonine-protein kinase
XLOC_024940	PSS08438.1Lamin tail domain-containing protein
XLOC_024945	---NA---
XLOC_025021	---NA---
XLOC_025255	XP_019237100.1 17.3 kDa class II heat shock protein-like
XLOC_025345	XP_027074553.1AAA-ATPase ASD, mitochondrial-like
XLOC_025478	XP_010658151.1 probable protein phosphatase 2C 38 isoform X1
XLOC_025579	XP_021631564.1transcription factor bHLH155-like
XLOC_025802	XP_019237100.1 17.3 kDa class II heat shock protein-like
XLOC_026067	PSR98892.1LysM domain receptor-like kinase
XLOC_026487	PSR89984.1Auxin response factor like
XLOC_026502	PSS14399.1F-box/kelch-repeat protein
XLOC_026670	---NA---
XLOC_026915	---NA---
XLOC_026986	RVX23377.1putative WRKY transcription factor 7
XLOC_027075	XP_022718874.1transcription repressor MYB5-like
XLOC_027158	AKQ62962.1alpha-amylase 2
XLOC_027194	PSR92706.1Glutamate-1-semialdehyde 2,1-aminomutase
XLOC_027337	RVW14693.1NEP1-interacting protein-like 2
XLOC_027381	PSS14236.1Scarecrow-like protein
XLOC_027507	XP_019428766.1 AAA-ATPase ASD, mitochondrial-like isoform X2
XLOC_027572	PSR95043.1Nodulation-signaling pathway 2 protein
XLOC_027943	PSR93593.1Aspartic protease precursor
XLOC_027979	XP_018816414.1 putative pentatricopeptide repeat-containing protein At1g56570
XLOC_028421	PSS32712.1Ferritin like
XLOC_028488	PSS36011.1Hordoindoline-B1 like
XLOC_029240	XP_002282913.1 zinc finger A20 and AN1 domain-containing stress-associated protein 4
XLOC_029409	PSS00170.1GPI-anchored adhesin-like protein precursor
XLOC_029510	PSS06040.1Serine acetyltransferase
XLOC_029637	PSR88213.1CTP synthase
XLOC_029727	PSS06220.1ABC transporter C family member 4 like
XLOC_029829	PSS24476.1DNA-damage-repair/toleration protein
XLOC_030445	PSS30533.1Cytochrome P450 85A1 like
XLOC_030477	PSR85135.1Transcription termination factor like
XLOC_030693	PSS07783.1Inactive poly [ADP-ribose] polymerase SRO5
XLOC_030792	PSR95920.1Nucleoside diphosphate kinase
XLOC_031310	XP_011076095.1fructose-bisphosphate aldolase 3, chloroplastic
XLOC_031685	PSR89303.1Phosphonates import ATP-binding protein like
XLOC_031813	---NA---
XLOC_031844	PSR96967.1Ethylene-responsive transcription factor RAP2-12 like
XLOC_033086	PSR99587.1NAD(P)H-quinone oxidoreductase
XLOC_033137	XP_002281623.1 probable sugar phosphate/phosphate translocator At1g12500
XLOC_033608	PSS32969.1Cytochrome b5 E like
XLOC_033623	PSS31589.1Mitochondrial uncoupling protein
XLOC_033696	PSS04003.1Heavy metal-associated isoprenylated plant protein
XLOC_034439	OMP04734.1hypothetical protein COLO4_09345
XLOC_034847	PSR86715.1B2 protein
XLOC_034907	PSS17523.1Large-conductance mechanosensitive channel like
XLOC_034986	PSS28675.1Pyruvate dehydrogenase E1 component subunit alpha like
XLOC_035240	XP_019053208.1 subtilisin-like protease SBT3.17
XLOC_035425	PSS00263.1Butyrate--CoA ligase AAE11, peroxisomal like
XLOC_035464	PSS35871.1Inositol transporter like
XLOC_035784	PSS32843.1Transmembrane protein
XLOC_035795	XP_022881055.1LIM domain-containing protein A-like
XLOC_035808	PSS26903.1BTB/POZ domain-containing protein
XLOC_035831	RVW71366.1Transposon TX1 uncharacterized 149 kDa protein
XLOC_035991	XP_015865990.1PHD finger protein ALFIN-LIKE 4-like isoform X1
XLOC_036449	---NA---
XLOC_036761	PKU84090.1RNA exonuclease 1
XLOC_037030	XP_021679519.1protein SRG1-like isoform X1
XLOC_037115	XP_017219532.1 endochitinase EP3
XLOC_037277	XP_010646332.1 esterase AGAP003155
XLOC_038397	PSS35871.1Inositol transporter like
XLOC_038503	PSR95868.1CASP-like protein
XLOC_038560	OEL12556.1MADS-box transcription factor 8
XLOC_038982	XP_022136854.1probable E3 ubiquitin-protein ligase RHG1A
XLOC_039073	ESR57474.1hypothetical protein CICLE_v10023116mg
XLOC_039519	PSS33917.1Protein like
XLOC_039566	PSS26206.1Protein like
XLOC_039567	XP_015062742.1uncharacterized protein LOC107008284
XLOC_039726	XP_016499977.1 sugar phosphatase YfbT-like
XLOC_039907	PSR99926.1U-box domain-containing protein
XLOC_040506	PSS23912.1APC membrane recruitment protein like
XLOC_040573	PSS30313.1Serine/threonine-protein kinase
XLOC_040932	PSR88180.1T-cell surface glycoprotein CD8 beta chain like
XLOC_040938	XP_019257903.1 proline-rich receptor-like protein kinase PERK8
XLOC_040977	PSS00349.1Thioredoxin reductase
XLOC_041400	---NA---
XLOC_041474	PSS29301.1Transcription factor bHLH113 like
XLOC_041699	PWA55717.1C4-dicarboxylate transporter/malic acid transport protein
XLOC_041740	AZL19395.1transcription factor TCP2
XLOC_042327	PSR92868.1Glutathione S-transferase
XLOC_043063	PSS21326.1MACPF domain-containing protein
XLOC_043083	PSS30478.1Chorismate mutase
XLOC_043307	PSR96479.1Cationic amino acid transporter 8, vacuolar like
XLOC_043608	XP_009617687.1 30S ribosomal protein S31, mitochondrial
XLOC_043702	AII80417.1RING-type E3 ubiquitin ligase
XLOC_043762	PSR95452.1Protein DETOXIFICATION like
XLOC_043962	PSR86190.1Zinc transporter 6 like
XLOC_043987	PSS28968.150S ribosomal protein
XLOC_044056	PSS24238.1Acidic endochitinase
XLOC_044381	XP_007212176.2dof zinc finger protein DOF1.5
XLOC_044889	XP_022847987.1putative hydrolase C777.06c isoform X2
XLOC_044891	PSR98709.1Homoserine O-succinyltransferase
XLOC_044949	PSR95793.1NEP1-interacting protein-like
XLOC_045021	XP_009378049.1 myelin transcription factor 1-like protein
XLOC_045146	XP_006388158.1zinc finger CCCH domain-containing protein 11 isoform X2
XLOC_045199	PSS26772.1DExH-box ATP-dependent RNA helicase
XLOC_045374	XP_019192036.1 protein kinase APK1A, chloroplastic-like
XLOC_045635	PSS11872.1DNA polymerase delta subunit like
XLOC_045976	---NA---
XLOC_046439	PSR96734.1Leucine-rich repeat receptor-like serine/threonine/tyrosine-protein kinase
XLOC_046488	PSR94897.1Tyrosine decarboxylase
XLOC_046563	XP_021605405.1putative glucuronosyltransferase PGSIP8
XLOC_046725	KYP41064.1Retrovirus-related Pol polyprotein from transposon TNT 1-94
XLOC_046947	PON57143.1Fatty acid desaturase, type
XLOC_047203	PSR92831.1Receptor-like protein kinase
XLOC_047430	XP_012459485.1 protein kinase APK1A, chloroplastic
XLOC_047507	XP_010113156.1hexose carrier protein HEX6
XLOC_048071	XP_021906286.1E3 ubiquitin-protein ligase RHA1B
XLOC_048213	PSR95621.1DNA replication regulator sld2 like
XLOC_000022	PSS02953.1Protein REDUCED WALL ACETYLATION like
XLOC_000192	XP_009589856.1 S-adenosylmethionine synthase 1
XLOC_000451	ARU79077.1beta-glucosidase 9 GH1 family
XLOC_000503	PSS04692.1Dihydrolipoyllysine-residue succinyltransferase component of 2-oxoglutarate dehydrogenase
XLOC_000525	---NA---
XLOC_000598	XP_020548543.1uncharacterized WD repeat-containing protein C2A9.03 isoform X2
XLOC_000600	XP_013460860.1uncharacterized WD repeat-containing protein C2A9.03 isoform X1
XLOC_000628	KHN37815.1Protein IDA
XLOC_000672	XP_009779857.1 probable carboxylesterase 18
XLOC_000718	PSS10079.1Protein NRT1/ PTR FAMILY 7.3 like
XLOC_000731	PSS34769.1WRKY transcription factor 70
XLOC_000821	XP_017182607.1 protein NRT1/ PTR FAMILY 7.3-like
XLOC_000885	XP_019162370.1 heterogeneous nuclear ribonucleoprotein A3 homolog 2-like isoform X1
XLOC_001227	PSR91508.1Osmotin-like protein
XLOC_001604	PSR93307.1Acid phosphatase
XLOC_001695	PSS07800.1U-box domain-containing protein
XLOC_001780	XP_006420621.1putative vesicle-associated membrane protein 726
XLOC_001932	XP_011082571.140S ribosomal protein S24-1
XLOC_002026	XP_008240231.1 non-specific lipid-transfer protein 2-like
XLOC_002027	PSS08386.1Reticulon-like protein
XLOC_002206	EXC17237.1 Epoxide hydrolase 2
XLOC_002297	XP_023887714.1GDSL esterase/lipase 1-like
XLOC_002307	PIN00818.1Plasma membrane H+-transporting ATPase
XLOC_002352	XP_008223466.1 actin
XLOC_002383	XP_018845910.1 formin-like protein 11
XLOC_002414	PSR88080.1DDT domain-containing protein
XLOC_002480	XP_002309925.1E3 ubiquitin-protein ligase RGLG3 isoform X2
XLOC_002703	PSS20920.1Mannitol dehydrogenase
XLOC_002760	PSS02875.1Inner centromere protein like
XLOC_002983	PSS28612.1ACT domain-containing protein
XLOC_003315	OVA17387.1Acyl carrier protein (ACP)
XLOC_003340	PSR90940.1Protein ASPARTIC PROTEASE IN GUARD CELL 2 like
XLOC_003351	PSS26007.1Basigin like
XLOC_003455	XP_010262549.1 cyclin-dependent protein kinase inhibitor SMR2
XLOC_003548	XP_012092922.1enolase 1, chloroplastic
XLOC_003602	XP_004250155.1receptor-like cytosolic serine/threonine-protein kinase RBK1 isoform X1
XLOC_003900	---NA---
XLOC_003990	XP_016474372.1PREDICTED: uncharacterized protein LOC107796146 isoform X4
XLOC_004042	PSS11793.1Binding partner of like
XLOC_004052	XP_010918940.1 receptor-like serine/threonine-protein kinase SD1-7 isoform X3
XLOC_004107	PSS12084.1Cytochrome b-c1 complex subunit Rieske-5 like isoform 1
XLOC_004165	XP_027162122.1protein PHLOEM PROTEIN 2-LIKE A1-like
XLOC_004314	XP_024445860.1probable leucine-rich repeat receptor-like serine/threonine-protein kinase At3g14840 isoform X2
XLOC_004485	PSS01627.1Syntaxin-121 like
XLOC_004531	PHT32714.1hypothetical protein CQW23_29051, partial
XLOC_004564	XP_009761175.1 SNAP25 homologous protein SNAP33
XLOC_004717	XP_012088399.1serine/threonine-protein phosphatase PP1 isozyme 4
XLOC_004731	APQ47313.1AP2/ERF domain-containing transcription factor
XLOC_004774	BAB89349.11-aminocyclopropane-1-carboxylate synthase
XLOC_004785	PSR86003.1Indole-3-acetic acid-amido synthetase GH3.9
XLOC_004827	PSR94789.1Receptor-like serine/threonine-protein kinase
XLOC_004828	PSR94790.1LRR receptor-like serine/threonine-protein kinase
XLOC_004899	XP_027063679.1 glutaredoxin-C11-like
XLOC_004930	XP_002284419.2 DIS3-like exonuclease 2 isoform X1
XLOC_005041	PSR92753.1Slit 2 protein like
XLOC_005115	RVX17469.1Rust resistance kinase Lr10
XLOC_005118	XP_021813614.1ethylene-responsive transcription factor 1A
XLOC_005227	PSR86470.1NAC domain-containing protein
XLOC_005301	PSS26331.1Acyl-coenzyme A thioesterase
XLOC_005437	PSR86166.1Inositol 3-kinase
XLOC_005654	---NA---
XLOC_005815	GAV60470.1GFA domain-containing protein
XLOC_005822	PSR89232.1AAA ATPase forming ring-shaped complexes like
XLOC_005826	PSS29186.1Tubby-like F-box protein
XLOC_005957	PSR85035.1Protein ENHANCED DISEASE RESISTANCE like
XLOC_006010	PSR89309.1Zinc transporter 4 like
XLOC_006018	PSR95924.1ATP-dependent RNA helicase
XLOC_006035	AGG39692.1ERF transcription factor ERF1
XLOC_006055	PSS30309.1BAR domain protein
XLOC_006157	PSS30522.1Receptor-like protein kinase
XLOC_006380	PSR85193.1YTH domain-containing family protein
XLOC_006408	XP_012092659.1probable voltage-gated potassium channel subunit beta
XLOC_006436	PSS28760.1GDP-fucose protein O-fucosyltransferase protein
XLOC_006467	PSS02766.1Heat shock 70 protein
XLOC_006601	PSR91863.1GPI-anchored protein like
XLOC_007303	XP_011079403.1probable cyclic nucleotide-gated ion channel 5
XLOC_007371	PSR88270.1Carbohydrate-responsive element-binding protein
XLOC_007412	GAV58262.1NmrA domain-containing protein
XLOC_007682	RVW66694.1putative carboxylesterase 2
XLOC_007756	PSS36185.1Lactation elevated protein
XLOC_007962	XP_019074698.1 squamosa promoter-binding-like protein 6 isoform X1
XLOC_008004	PSS32946.1Protein TRANSPARENT TESTA GLABRA like
XLOC_008031	PSR93390.1Glycosyltransferase family 64 protein
XLOC_008178	RVW50459.1putative transcription factor KAN4
XLOC_008206	XP_022721114.1ethylene-responsive transcription factor ERF091-like
XLOC_008240	XP_011076015.1cyclic nucleotide-gated ion channel 1
XLOC_008300	---NA---
XLOC_008380	PSR98545.1Cyclin-D6-1 like
XLOC_008386	PSR93617.1Thermospermine synthase
XLOC_008564	XP_027170346.1heavy metal-associated isoprenylated plant protein 16-like
XLOC_008587	PSS26512.1Serine/threonine-protein phosphatase PP1 isozyme like
XLOC_008598	---NA---
XLOC_008656	AYQ58363.1terpene synthase 2
XLOC_008701	PSS24892.1DnaJ subfamily B member like
XLOC_008838	PSS29393.1Mitochondrial fission regulator like
XLOC_008873	AAP80667.1ribosomal Pr 117
XLOC_008881	PSS19667.1Calmodulin-binding protein 60 B like
XLOC_008966	PSR98655.1Cyclin-D-binding Myb-like transcription factor
XLOC_008972	XP_011013494.1 disease resistance RPP13-like protein 4
XLOC_009003	PSR87970.1F-box protein
XLOC_009103	PSR94958.1Histidine-rich glycoprotein
XLOC_009234	---NA---
XLOC_009384	PSR96398.1ABC transporter G family member 10 like
XLOC_009511	PSS28910.1Berberine bridge enzyme-like
XLOC_009533	XP_021749213.1probable aldo-keto reductase 4
XLOC_009664	XP_017254351.1 transmembrane and coiled-coil domain-containing protein 1
XLOC_009712	PSS04969.1Signaling mucin like
XLOC_009749	XP_018841842.1 zinc finger CCCH domain-containing protein 18 isoform X1
XLOC_009804	PSS11419.1Protein LURP-one-related like
XLOC_009838	XP_027114191.1probable glucan endo-1,3-beta-glucosidase A6
XLOC_009843	---NA---
XLOC_009847	PSS15724.1Legume lectin domain protein
XLOC_009896	PSS08143.1Chitotriosidase-1 like
XLOC_009915	PSR89859.1Cytochrome b-c1 complex subunit like
XLOC_009998	---NA---
XLOC_010054	PSR92786.1PRA1 family protein
XLOC_010089	XP_011069505.1probable L-ascorbate peroxidase 6, chloroplastic isoform X2
XLOC_010108	PSS01993.1Serine/threonine-protein kinase
XLOC_010198	PSR85275.1Long-chain-alcohol O-fatty-acyltransferase
XLOC_010286	---NA---
XLOC_010338	ADN96003.140S ribosomal protein
XLOC_010389	PSR99912.1Tetratricopeptide repeat protein like
XLOC_010429	XP_024461028.1ankyrin repeat-containing protein ITN1
XLOC_010531	PSR85451.1LRR receptor-like serine/threonine-protein kinase
XLOC_010625	PSR95270.1G-type lectin S-receptor-like serine/threonine-protein kinase
XLOC_010635	PSS06006.1Galactinol--sucrose galactosyltransferase
XLOC_010752	AYA60150.1vacuolar amino acid transporter 5
XLOC_010791	XP_006381562.1eukaryotic translation initiation factor 3 subunit K
XLOC_010811	PSS24113.1Ubiquitin-associated and SH3 domain-containing protein
XLOC_010878	ACB20696.1putative cold-inducible protein
XLOC_010980	PSS20878.1Set1 complex component ash2 like
XLOC_011076	PSR89479.1Cytochrome P450 71A8 like
XLOC_011235	RLM78735.1auxin efflux carrier component 1
XLOC_011356	PSS05012.1Acetylornithine aminotransferase
XLOC_011425	XP_011084873.1eukaryotic translation initiation factor 2 subunit alpha homolog
XLOC_011435	XP_019074106.1 G-type lectin S-receptor-like serine/threonine-protein kinase B120 isoform X1
XLOC_011645	XP_027111514.1OTU domain-containing protein DDB_G0284757 isoform X1
XLOC_011949	XP_023897942.139S ribosomal protein L45, mitochondrial-like isoform X1
XLOC_011964	PSS11693.1Ferric reduction oxidase
XLOC_012111	PSR93625.1Copper-transporting ATPase
XLOC_012132	XP_018810646.1 G-type lectin S-receptor-like serine/threonine-protein kinase At4g27290
XLOC_012175	PSR93189.1Myosin-5 like
XLOC_012179	PSS28924.1Berberine bridge enzyme-like
XLOC_012182	PSS28924.1Berberine bridge enzyme-like
XLOC_012248	XP_027170394.1peroxidase 3-like
XLOC_012393	XP_018503886.1 zinc finger protein ZAT10-like
XLOC_012626	PSS34342.1Spore coat assembly protein like
XLOC_012664	PSS17969.1Cinnamyl alcohol dehydrogenase
XLOC_012686	RVW47568.1Arabinogalactan peptide 16
XLOC_012761	---NA---
XLOC_012775	---NA---
XLOC_012893	PSS29317.1Cysteine proteinase
XLOC_012919	XP_027116262.1mavicyanin-like isoform X1
XLOC_012975	PSS31847.1Sucrose transport protein
XLOC_013025	PSR90911.1D-galacturonate reductase
XLOC_013061	RVW18297.1Transposon Ty3-G Gag-Pol polyprotein
XLOC_013115	XP_002276804.1 UDP-glycosyltransferase 83A1
XLOC_013406	AZL19530.1transcription factor bHLH5
XLOC_013424	XP_018859878.1 transcriptional regulator DEF1-like
XLOC_013484	PSR85174.1E3 ubiquitin-protein like
XLOC_013486	PSR85174.1E3 ubiquitin-protein like
XLOC_013493	PSS35061.1Protein trichome birefringence-like
XLOC_013549	XP_022762191.1polygalacturonase QRT3-like
XLOC_013578	PSS11512.1Trehalose-phosphate phosphatase
XLOC_013672	PSS28805.1Cyclic nucleotide-gated ion channel like
XLOC_013891	ABH09330.1 putative aquaporin
XLOC_013995	XP_010663122.1 lysine-specific demethylase JMJ706 isoform X2
XLOC_014075	XP_019178575.1 multiple organellar RNA editing factor 2, chloroplastic-like
XLOC_014093	PKU73550.1ataxia telangiectasia mutated family protein
XLOC_014350	---NA---
XLOC_014415	XP_024456548.1G-type lectin S-receptor-like serine/threonine-protein kinase B120
XLOC_014424	PIN01212.1Aldehyde reductase
XLOC_014476	PSS29112.1RNA-directed RNA polymerase
XLOC_014526	PSR95607.1Mediator of RNA polymerase II transcription subunit like
XLOC_014598	PSR89309.1Zinc transporter 4 like
XLOC_014606	PON46081.1VQ motif containing protein
XLOC_014705	PSR85366.1Thermospermine synthase
XLOC_014748	XP_010060203.1 snakin-2
XLOC_014784	PSS31711.1UPF0496 protein
XLOC_014788	PSS31711.1UPF0496 protein
XLOC_014812	PSR92976.1Protein DMR6-LIKE OXYGENASE 2 like
XLOC_014853	PSS21269.1Ethylene-responsive transcription factor
XLOC_014905	XP_015887866.1uncharacterized protein LOC107422873
XLOC_014914	PSR99812.1Receptor protein kinase
XLOC_015019	PSR88361.1Eukaryotic porin/Tom40 protein
XLOC_015050	PSS14314.1Mitogen-activated protein kinase
XLOC_015319	XP_021906078.1heat shock cognate protein 80
XLOC_015375	XP_023894827.1prolyl endopeptidase-like isoform X4
XLOC_015551	XP_023879039.1plant UBX domain-containing protein 10-like isoform X1
XLOC_015561	PSS24736.1Topoisomerase I damage affected protein
XLOC_015608	PSR98641.1Cellulose synthase A catalytic subunit 8 [UDP-forming] like
XLOC_015754	PSR89445.1HVA22-like protein
XLOC_015770	PSR99580.1Pathogenesis-related protein like
XLOC_015815	XP_015879972.1putative glutamine amidotransferase GAT1_2.1 isoform X1
XLOC_015881	RVW35419.1putative thimet oligopeptidase
XLOC_016059	PSS04325.1Gamma-glutamyl peptidase
XLOC_016101	PSR95838.1Sal-like protein
XLOC_016361	PSR96547.1G-type lectin S-receptor-like serine/threonine-protein kinase
XLOC_016579	PSS12141.1LysM domain-containing GPI-anchored protein like
XLOC_016607	XP_022641754.1hydroxyphenylpyruvate reductase
XLOC_016830	PSS28946.1Ninja-family protein
XLOC_016839	RWR94899.1ataxia telangiectasia mutated family protein
XLOC_016893	PSR89883.1RAB6-interacting golgin like
XLOC_017003	XP_021650761.1L-type lectin-domain containing receptor kinase V.9-like
XLOC_017103	PSS19041.1Transmembrane 9 superfamily member 1 like
XLOC_017114	GAV62460.1WI12 domain-containing protein
XLOC_017193	XP_018624763.1 G-type lectin S-receptor-like serine/threonine-protein kinase LECRK3
XLOC_017330	PSS34391.1Glutamate dehydrogenase
XLOC_017361	AET97665.1hydrogen peroxide induced protein 1
XLOC_017414	PSS29198.1WRKY transcription factor
XLOC_017432	PSS11327.1Hydroquinone glucosyltransferase
XLOC_017447	PSR96283.1Centrosomal protein
XLOC_017451	PSS30635.1Glycine-rich domain-containing protein
XLOC_017525	ADN27527.1caffeic acid O-methyltransferase
XLOC_017575	XP_018831904.1 protein KTI12 homolog
XLOC_017653	---NA---
XLOC_017691	PSS04089.1Homeodomain-interacting protein kinase
XLOC_017823	PSR84754.1Protein HEG 1 like
XLOC_017830	PSS11198.1Zinc finger protein
XLOC_017889	XP_027084399.1G-type lectin S-receptor-like serine/threonine-protein kinase CES101
XLOC_018035	---NA---
XLOC_018041	XP_007011612.2 vitellogenin
XLOC_018085	XP_002512368.1uncharacterized GPI-anchored protein At5g19250
XLOC_018160	PSS10079.1Protein NRT1/ PTR FAMILY 7.3 like
XLOC_018232	PSS09893.1Soluble inorganic pyrophosphatase
XLOC_018362	PSS35017.1Zeatin O-glucosyltransferase
XLOC_018438	PSR98673.1Signaling mucin like
XLOC_018445	PSS26856.1U-box domain-containing protein
XLOC_018692	ADD10719.1acetyl-CoA C-acetyltransferase protein
XLOC_018695	PSR96466.1Nudix hydrolase
XLOC_018733	XP_011096967.2 ABC transporter G family member 25
XLOC_018738	PWA45395.1Ribosomal protein L33
XLOC_018750	RVW64152.1Protein accelerated cell death 6
XLOC_018882	PSS31467.1Cytochrome P450 81F3 like
XLOC_018936	XP_026450021.1probable galacturonosyltransferase-like 4
XLOC_019047	XP_027352222.160S ribosomal protein L21-1
XLOC_019135	PSS04906.1Cingulin-like protein
XLOC_019199	---NA---
XLOC_019270	ASU87411.14-coumarate-CoA ligase
XLOC_019338	PSS30768.1Josephin-1 like
XLOC_019367	PSS31540.1Phosphoglycerate mutase-like protein
XLOC_019451	XP_006350990.1 polyubiquitin-like
XLOC_019628	PSS16142.1Mitogen-activated protein kinase kinase
XLOC_019667	PSR87918.1Glycosyltransferase 7
XLOC_019813	PSR89309.1Zinc transporter 4 like
XLOC_019855	PSS15656.1E3 ubiquitin-protein ligase MID2
XLOC_019998	PSS01695.1S-sulfocysteine synthase
XLOC_020139	PSS14303.1Cytochrome c oxidase assembly protein
XLOC_020208	XP_023902738.1type IV inositol polyphosphate 5-phosphatase 3 isoform X2
XLOC_020223	KYP38253.1Peroxidase 39
XLOC_020282	PSR89837.1CCR4-associated factor 1 like
XLOC_020296	PSS11270.1Soluble inorganic pyrophosphatase
XLOC_020355	PSS28921.1Berberine bridge enzyme-like
XLOC_020591	PSR84762.1Polyadenylate-binding protein like
XLOC_020615	PSS11301.1UDP-glucose 4-epimerase
XLOC_020668	---NA---
XLOC_020690	XP_010246832.1 exosome complex component RRP45A-like isoform X1
XLOC_020818	PSR84685.1Phosphomethylethanolamine N-methyltransferase
XLOC_020846	PSR87637.1Thaumatin-like protein
XLOC_020866	XP_008218833.1 cytochrome b-c1 complex subunit 6
XLOC_020962	PSS19230.1Metacaspase-1 like
XLOC_021005	XP_023920878.1AIG2-like protein D isoform X2
XLOC_021189	XP_012843670.1 probable methyltransferase PMT15
XLOC_021199	---NA---
XLOC_021445	PSR92961.1Beta-D-glucosyl crocetin beta-1,6-glucosyltransferase
XLOC_021453	PSS17172.1Serine/threonine-protein kinase
XLOC_021518	XP_002266038.1 probable E3 ubiquitin-protein ligase RHY1A
XLOC_021660	---NA---
XLOC_021820	AEI83425.1transcription factor R2R3-MYB1
XLOC_021894	RVW86929.1Ferredoxin-3, chloroplastic
XLOC_021897	XP_006488031.1ubiquitin-40S ribosomal protein S27a-like
XLOC_022082	PSS17743.1Cytochrome P450 734A6 like
XLOC_022372	---NA---
XLOC_022748	PSS35258.1E3 ubiquitin-protein like
XLOC_022946	PSR95054.1Internal alternative NAD(P)H-ubiquinone oxidoreductase
XLOC_022949	PSS09494.1Zinc finger CCCH domain-containing protein
XLOC_023069	PSS33335.1Aquaporin PIP1-4 like
XLOC_023210	XP_019080324.1 AAA-ATPase At3g28580
XLOC_023258	PSR95943.1Ribonucleoside-diphosphate reductase small chain like
XLOC_023291	XP_021276908.1probable glycosyltransferase At5g03795
XLOC_023582	PSS03071.1Homeobox protein
XLOC_023730	---NA---
XLOC_023732	XP_026427688.1calcium-transporting ATPase 4, plasma membrane-type-like isoform X1
XLOC_023825	AEJ72569.1putative reverse transcriptase family member
XLOC_023925	PSS30816.1Polyol transporter like
XLOC_023963	---NA---
XLOC_024011	PSS13984.1Phospholipase D beta like
XLOC_024013	GAV61832.1LysM domain-containing protein
XLOC_024061	PON89215.1sequence-specific DNA binding transcription factor
XLOC_024470	PSS16221.1Nucleoporin like
XLOC_024532	---NA---
XLOC_024999	PSR99656.1Protein translocase subunit SecA like
XLOC_025035	PSR84826.1Ribose-phosphate pyrophosphokinase
XLOC_025358	PSS29078.1RING-H2 finger protein
XLOC_025456	---NA---
XLOC_025662	---NA---
XLOC_025752	PSS15919.1ABC transporter B family member 29 like
XLOC_025817	PSS35102.1HAD-like domain protein
XLOC_026234	PSS09869.1RHOMBOID-like protein
XLOC_026328	PON82464.1WD repeat protein 35
XLOC_026409	AKQ62850.1raffinose synthase 1
XLOC_026438	PSR89748.1Cortactin-binding protein like
XLOC_026611	AIL29211.13-hydroxyacyl-CoA dehydratase
XLOC_026614	XP_021638895.1subtilisin-like protease SBT1.4
XLOC_026641	PSS16441.1Glutaredoxin-C9 like
XLOC_026695	---NA---
XLOC_027222	PSS24472.1Arabinogalactan protein 40 precursor
XLOC_027343	PSR93625.1Copper-transporting ATPase
XLOC_027351	PSR84510.1Protein kinase C and casein kinase substrate in neurons protein
XLOC_027605	PSR89904.1Aspartic proteinase-like protein
XLOC_027650	AID55355.1NAC protein 4
XLOC_027688	PSS29371.1Protein DMR6-LIKE OXYGENASE 2 like
XLOC_027700	PSR89947.1KiTH-2 like
XLOC_027921	PSS24549.1Glutathione transferase
XLOC_028165	XP_027127316.1ethylene-responsive transcription factor 4-like
XLOC_028170	PSS05696.1Phospholipid-transporting ATPase
XLOC_028263	PSR99880.1Protein like
XLOC_028328	XP_011043029.1 ethylene-responsive transcription factor ERF114
XLOC_028443	---NA---
XLOC_028575	XP_024020706.1uncharacterized protein LOC112091398
XLOC_028685	PSS31561.1Mechanosensitive ion channel protein
XLOC_028821	PSS24733.1Receptor-like serine/threonine-protein kinase
XLOC_028833	PSR96042.1Cytochrome c oxidase subunit 5b-1 like
XLOC_028861	XP_009376002.1 calmodulin-like protein 11
XLOC_029009	---NA---
XLOC_029094	PSR98075.1Protein SMAX1-LIKE like
XLOC_029278	XP_024038073.1protein LITTLE ZIPPER 4
XLOC_029385	---NA---
XLOC_029387	XP_022776716.1protein NRT1/ PTR FAMILY 5.5-like
XLOC_029569	XP_008218833.1 cytochrome b-c1 complex subunit 6
XLOC_029592	XP_002274131.2 peroxidase 55
XLOC_029673	XP_010649056.1 NAC domain-containing protein 37 isoform X2
XLOC_029698	XP_002510484.1probable LRR receptor-like serine/threonine-protein kinase At4g36180
XLOC_029820	ASJ80913.1gibberellin 2-oxidase 1
XLOC_029878	RVW36762.1Retrovirus-related Pol polyprotein from transposon RE1
XLOC_030045	PSS13623.1E3 ubiquitin-protein like
XLOC_030072	---NA---
XLOC_030076	---NA---
XLOC_030165	XP_002274161.2 probable helicase CHR10 isoform X1
XLOC_030389	PSR89685.1Phosphatidylinositol/phosphatidylcholine transfer protein
XLOC_030446	PSS30531.1Protein COBRA like
XLOC_030540	PSS15944.1Uridine nucleosidase
XLOC_030673	XP_018827342.1 serine/threonine-protein kinase tricorner isoform X3
XLOC_030711	---NA---
XLOC_030941	PSS24559.1Microtubule-associated protein
XLOC_031233	XP_021683847.1putative 12-oxophytodienoate reductase 11 isoform X2
XLOC_031287	BAE80325.1cyclin D3-2
XLOC_031308	XP_021296369.1protein ZINC INDUCED FACILITATOR-LIKE 1-like isoform X1
XLOC_031328	PSS01141.1Pentatricopeptide repeat-containing protein
XLOC_031494	PSS30436.1Inositol hexakisphosphate and diphosphoinositol-pentakisphosphate kinase
XLOC_031618	PSR95422.1Elongation factor 1-beta 2 like
XLOC_031638	PSS07400.1(-)-isopiperitenol/(-)-carveol dehydrogenase
XLOC_031701	PSR96661.1Hydroxyproline O-galactosyltransferase
XLOC_032146	PIN01528.1hypothetical protein CDL12_25964
XLOC_032303	PSS31727.1U-box domain-containing protein
XLOC_032518	PSS10445.1C2 and GRAM domain-containing protein
XLOC_032532	XP_021600856.1putative 12-oxophytodienoate reductase 11
XLOC_032600	XP_015886995.1protein FAR1-RELATED SEQUENCE 5-like
XLOC_032767	PSS32562.17-deoxyloganetic acid glucosyltransferase
XLOC_033103	XP_019076602.1 probable cadmium/zinc-transporting ATPase HMA1, chloroplastic isoform X2
XLOC_033117	EOY13993.1Laccase 17
XLOC_033120	PSR89770.150S ribosomal protein like
XLOC_033154	---NA---
XLOC_033288	XP_002266038.1 probable E3 ubiquitin-protein ligase RHY1A
XLOC_033313	PSS30000.1NEP1-interacting protein
XLOC_033698	PSS24269.1Mitogen-activated protein kinase
XLOC_033723	PSS34391.1Glutamate dehydrogenase
XLOC_033874	PSS06366.1Serine/threonine-protein kinase
XLOC_033888	PSS11292.1Dihydroxy-acid dehydratase
XLOC_033917	PSS24736.1Topoisomerase I damage affected protein
XLOC_033936	PSS04279.1TRIO and F-actin-binding protein
XLOC_033937	BBC44637.1valerianol synthase
XLOC_033971	PSR91863.1GPI-anchored protein like
XLOC_034002	KHG07170.140S ribosomal S10-3 -like protein
XLOC_034158	PSR98568.1Serine carboxypeptidase-like
XLOC_034177	PSR86915.1Pumilio 12 like
XLOC_034330	XP_002268701.1 arogenate dehydratase 3, chloroplastic
XLOC_034418	PSR98223.1Phosphatidate phosphatase
XLOC_034499	PSS06018.1Transmembrane emp24 domain-containing protein
XLOC_034742	PSS23607.1Soluble scavenger receptor cysteine-rich domain-containing protein
XLOC_034791	OVA10153.1Chorismate synthase
XLOC_034850	PSS11977.1G-type lectin S-receptor-like serine/threonine-protein kinase
XLOC_035044	XP_006438745.1O-fucosyltransferase 3
XLOC_035072	XP_016567830.1 heavy metal-associated isoprenylated plant protein 20 isoform X1
XLOC_035304	ADJ67439.1ethylene response factor 10
XLOC_035306	PSS29216.1Indole-3-glycerol phosphate synthase
XLOC_035539	PSS11716.1Digalactosyldiacylglycerol synthase
XLOC_035947	PSS01382.1Monodehydroascorbate reductase
XLOC_035995	XP_008233740.1 translation initiation factor IF-2
XLOC_036088	XP_011093185.1MADS-box transcription factor 6
XLOC_036412	XP_012082344.1protein CREG1
XLOC_036618	PSS23572.1Mucin-6 like
XLOC_036898	PSS01608.1Formin-like protein
XLOC_037023	PSS33587.1Leaf rust 10 disease-resistance locus receptor-like protein kinase
XLOC_037101	XP_010665021.1 protein BREVIS RADIX
XLOC_037257	PSR86713.1Receptor-like protein kinase
XLOC_037377	---NA---
XLOC_037379	PSS11968.1VQ motif-containing protein
XLOC_037383	PSS10037.1Transcription termination factor like
XLOC_037466	XP_009341751.1 expansin-A4
XLOC_037628	PSR90081.1Scarecrow-like protein
XLOC_037802	PSR91344.1Protein decapping like
XLOC_037931	PSS03901.13-ketoacyl-CoA synthase
XLOC_037932	PSS03901.13-ketoacyl-CoA synthase
XLOC_037970	XP_022719259.1glucan endo-1,3-beta-glucosidase 8-like
XLOC_038036	PSS32583.1Glucan endo-1,3-beta-glucosidase
XLOC_038045	Q9FNU2.1RecName: Full=ABC transporter B family member 25; Short=ABC transporter ABCB.25; Short=OsABCB25; AltName: Full=Protein ALS1 homolog; AltName: Full=Protein ALUMINUM SENSITIVE 1; Short=OsALS1
XLOC_038115	EOY14848.1 Peptide upstream open reading frame 5
XLOC_038181	PSS36218.1VIN3-like protein
XLOC_038318	PSS26446.1Myb family transcription factor
XLOC_038394	WP_107647109.1DUF4283 domain-containing protein
XLOC_038396	PSS35871.1Inositol transporter like
XLOC_038498	XP_010646785.1 cell wall protein RBR3
XLOC_038701	XP_019080456.1 polyubiquitin 4 isoform X2
XLOC_038722	XP_012828118.1 dual specificity protein phosphatase 12-like
XLOC_038728	XP_002269790.1 spermidine hydroxycinnamoyl transferase
XLOC_038857	XP_004147700.1 putative nuclease HARBI1
XLOC_038862	XP_010260051.1 receptor-like protein kinase THESEUS 1
XLOC_039036	AFN85535.1PRp27-like protein
XLOC_039212	XP_015881049.1putative MO25-like protein At5g47540
XLOC_039453	P13087.3RecName: Full=Miraculin; Short=MIR; Flags: Precursor
XLOC_039507	WP_105299331.1hypothetical protein
XLOC_039607	PSR92635.1E3 ubiquitin-protein like
XLOC_039888	XP_021675400.1IST1-like protein
XLOC_040115	PSS02044.1Protein TIFY 10A like
XLOC_040132	PSS30311.1Glycerophosphodiester phosphodiesterase
XLOC_040246	KVI00623.1Zinc finger, RING/FYVE/PHD-type
XLOC_040402	PON72515.1Splicing factor, SPF
XLOC_040476	PSS28660.1IAA-amino acid hydrolase ILR1-like
XLOC_040527	---NA---
XLOC_040531	PSR98274.1Splicing factor 3B subunit like
XLOC_040699	PSS24252.1Glucose-6-phosphate 1-epimerase
XLOC_040702	---NA---
XLOC_040735	XP_012469303.1 splicing regulatory glutamine/lysine-rich protein 1
XLOC_040975	PSS34832.1BAG-associated GRAM protein
XLOC_041245	XP_027103444.1TOM1-like protein 1
XLOC_041264	PSS06301.1NAD(P)H dehydrogenaseFQR1-like
XLOC_041368	XP_018844047.1 crocetin glucosyltransferase, chloroplastic-like
XLOC_041377	PSS14134.1TRIO and F-actin-binding protein
XLOC_041505	PSS31847.1Sucrose transport protein
XLOC_041553	PSS11341.1Glucose-6-phosphate 1-epimerase
XLOC_041580	PSS00042.17-deoxyloganetin glucosyltransferase
XLOC_041589	PSS23859.1Protein sel-1 1 like
XLOC_041632	ASJ80910.1ent-kaurene oxidase
XLOC_041705	XP_022716022.1G-type lectin S-receptor-like serine/threonine-protein kinase At4g27290 isoform X1
XLOC_041708	OMO92851.1S-locus glycoprotein
XLOC_042299	PSS19395.112-oxophytodienoate reductase 2, N-terminally processed like
XLOC_042385	PSS19805.1BZIP transcription factor
XLOC_042573	PSS24526.1TMV resistance protein like
XLOC_042731	PSR91804.1Histone-lysine N-methyltransferase
XLOC_042762	PSS01950.1Asparagine--tRNA ligase
XLOC_042852	---NA---
XLOC_043052	XP_018814709.1 serine/threonine-protein kinase HT1-like
XLOC_043133	PSS26905.1Oligoxyloglucan-reducing end-specific xyloglucanaseprecursor
XLOC_043181	PSS18229.1Cytochrome b reductase
XLOC_043410	PSR85261.1Mediator of RNA polymerase II transcription subunit like
XLOC_043458	XP_027065404.1phosphatidylinositol:ceramide inositolphosphotransferase 1-like isoform X1
XLOC_043459	PSS09842.1Serine/threonine-protein kinase
XLOC_043495	PSS23567.1NDR1/HIN1-Like protein
XLOC_043510	ALO81815.1phenylacetaldehyde reductase
XLOC_043603	XP_007202511.160S ribosomal protein L6-3
XLOC_043782	GAV67287.1EFP domain-containing protein/EFP_N domain-containing protein/Elong-fact-P_C domain-containing protein
XLOC_043851	PSS35808.1Serine/threonine-protein kinase
XLOC_043968	PSS21510.1Trehalose-phosphate phosphatase
XLOC_044011	PSR87582.1GDSL esterase/lipase
XLOC_044132	RVW28566.1hypothetical protein CK203_094797
XLOC_044278	AYQ58353.12-C-methyl-D-erythritol 2,4-cyclodiphosphate synthase
XLOC_044409	PSR90957.1GEM-like protein
XLOC_044546	PSS28932.1WPP domain-interacting tail-anchored protein
XLOC_044551	ACJ04909.1polyphenol oxidase
XLOC_044657	PSS35988.1Receptor-like serine/threonine-protein kinase
XLOC_044690	---NA---
XLOC_044699	XP_021643359.1rust resistance kinase Lr10-like
XLOC_044718	PSR88213.1CTP synthase
XLOC_044820	PSR98331.1AT-hook motif nuclear-localized protein
XLOC_045181	PSS35048.1OTU domain-containing protein
XLOC_045269	OMO65950.1hypothetical protein COLO4_30895
XLOC_045282	PSR95335.1Protein like
XLOC_045349	PSR99809.1Carbohydrate esterase
XLOC_045410	PSS19866.1Neurotrophin receptor-interacting factor like
XLOC_045413	PSS17964.1Chaperone protein dnaJ 11 like
XLOC_045497	PSR98540.1G-type lectin S-receptor-like serine/threonine-protein kinase
XLOC_045549	XP_011097383.1serine/threonine-protein kinase HT1
XLOC_045929	PSS36067.1Graves disease carrier protein
XLOC_045960	XP_009368895.1 adenosine kinase 2
XLOC_045984	XP_027081184.1beta-adaptin-like protein C
XLOC_045990	PSS04628.1Myosin heavy chain, striated muscle like
XLOC_046002	XP_010658878.1 type I inositol polyphosphate 5-phosphatase 10 isoform X1
XLOC_046029	XP_022766127.1zinc finger protein ZAT5-like
XLOC_046073	---NA---
XLOC_046429	PSS21080.1NADPH--cytochrome P450 reductase
XLOC_046432	XP_007209145.1E3 ubiquitin-protein ligase RGLG2
XLOC_046518	XP_023913661.1uncharacterized protein LOC112025231
XLOC_046572	PSR91586.1TRNA (adenine(58)-N(1))-methyltransferase catalytic subunit
XLOC_046723	PSS20916.1Metallothiol transferase
XLOC_046775	XP_004136568.1 actin
XLOC_046790	OMO56547.1zinc finger protein 7-like protein
XLOC_046833	XP_022861300.1probable ran guanine nucleotide release factor isoform X2
XLOC_046844	XP_021599464.1G-type lectin S-receptor-like serine/threonine-protein kinase B120 isoform X4
XLOC_046860	---NA---
XLOC_046869	PSS21064.1Potassium/sodium hyperpolarization-activated cyclic nucleotide-gated channel 1 like
XLOC_046901	PSS24769.1Protein DMR6-LIKE OXYGENASE 2 like
XLOC_046919	PSS18262.1Magnesium transporter like
XLOC_046928	PSS05774.1Myb-related protein like
XLOC_047087	PSS10077.1Porin QuiX like
XLOC_047112	PSS32533.1Zinc finger CCCH domain-containing protein
XLOC_047113	PSS34472.1Serine/threonine-protein kinase-like protein
XLOC_047146	PSS17319.1Amino acid permease
XLOC_047168	XP_024449558.1probable amino acid permease 7 isoform X4
XLOC_047441	XP_023880781.1fruit protein pKIWI502-like
XLOC_047470	XP_027079432.1F-box protein At5g46170-like
XLOC_047481	AID16042.1putative universal stress protein
XLOC_047485	PSR89243.1Nuclear pore complex protein like
XLOC_047506	EOY22822.1Major facilitator superfamily protein
XLOC_047518	---NA---
XLOC_047525	---NA---
XLOC_047569	PSR89904.1Aspartic proteinase-like protein
XLOC_047715	PSS01968.1Cytidine deaminase
XLOC_047717	PSS04837.1Transcription factor bHLH30 like
XLOC_047787	XP_002281426.1 eukaryotic translation initiation factor 3 subunit C
XLOC_047813	XP_021663732.1uncharacterized protein LOC110652445
XLOC_047815	XP_021663732.1uncharacterized protein LOC110652445
XLOC_047886	PSR93367.150S ribosomal protein
XLOC_048136	PSS36027.1Calcium-transporting ATPase
XLOC_048159	PSS06062.1Stachyose synthase
XLOC_048171	PSR98616.1Glutamate receptor 2.7 like
XLOC_048260	XP_002268178.1 homeobox-leucine zipper protein HOX11
XLOC_048325	---NA---
XLOC_000188	PSS36135.1Mucin-5AC like
XLOC_000530	---NA---
XLOC_001101	ACQ42253.1SnRK2 calcium sensor
XLOC_001295	XP_021670613.1probable glutathione S-transferase
XLOC_001316	XP_022880043.1thaumatin-like protein 1b
XLOC_001557	PSR90082.1Scarecrow-like protein
XLOC_001646	PSS21786.1L-ascorbate oxidase
XLOC_002009	XP_015897269.1ammonium transporter 2-like
XLOC_002249	PSS14374.1Myb-related protein like
XLOC_002558	XP_007045414.2 D-galacturonate reductase
XLOC_002596	PSR96871.1Protein NRT1/ PTR FAMILY 1.2 like
XLOC_002816	---NA---
XLOC_003334	XP_021614075.1homeobox-leucine zipper protein HAT22-like
XLOC_003343	PSR88287.1UV excision repair protein
XLOC_003346	RVW48521.1VQ motif-containing protein 8, chloroplastic
XLOC_003398	OMO99638.1Cation-transporting P-type ATPase
XLOC_003492	---NA---
XLOC_003493	NP_001238525.1OS3-like protein
XLOC_003673	PSR91814.1Pleiotropic drug resistance protein
XLOC_003804	PSS18163.1Glutamine--fructose-6-phosphate aminotransferase
XLOC_003821	PQM33354.1pathogenesis-related protein PR-4
XLOC_004394	PSR89264.1Cellulose synthase-like protein
XLOC_004455	PSS17856.1DNA topoisomerase
XLOC_004512	NP_001289508.1agamous-like MADS-box protein AGL8 homolog
XLOC_004997	XP_010663618.1 LEAF RUST 10 DISEASE-RESISTANCE LOCUS RECEPTOR-LIKE PROTEIN KINASE-like 2.7
XLOC_005038	AYW51595.1mitochondrial alternative oxidase 1d
XLOC_005575	XP_021809939.1UDP-glycosyltransferase 89B2
XLOC_005699	XP_002276272.1 phytosulfokines
XLOC_005706	XP_023884498.1protein ZINC INDUCED FACILITATOR-LIKE 1-like
XLOC_005708	PSS19073.1Protein ZINC INDUCED FACILITATOR-LIKE like
XLOC_005733	XP_017257470.1 dirigent protein 1-like
XLOC_005737	PSS02771.1Nitronate monooxygenase
XLOC_005811	XP_002270182.2 probable xyloglucan endotransglucosylase/hydrolase protein 23
XLOC_005889	---NA---
XLOC_006190	XP_010062724.1 probable glutathione S-transferase
XLOC_006699	PSS34611.1Zinc finger protein
XLOC_006758	PSS33019.1Late embryogenesis abundant protein
XLOC_007016	PSS30105.1Legume lectin domain protein
XLOC_007129	PSS17378.1Protein Ycf2 like
XLOC_007291	PSS35803.1Uclacyanin-3 like
XLOC_007364	XP_023924851.1pentatricopeptide repeat-containing protein At4g16835, mitochondrial
XLOC_007476	OVA03828.1C2 calcium-dependent membrane targeting
XLOC_007602	PSS11544.1DNA mismatch repair protein
XLOC_007603	PSS11544.1DNA mismatch repair protein
XLOC_007701	XP_011089887.1MLO-like protein 6
XLOC_007961	XP_022775756.1protein BIG GRAIN 1-like E
XLOC_008452	PSS26895.1Protein DETOXIFICATION like
XLOC_008566	PSS26596.1NAC domain-containing protein
XLOC_009438	PSS09475.1Josephin-like protein
XLOC_009485	PSR86120.1E3 ubiquitin-protein like
XLOC_009536	XP_021745924.1probable aldo-keto reductase 4
XLOC_009586	XP_024956501.1 aspartyl protease family protein At5g10770
XLOC_009717	PRQ24615.1putative peroxidase
XLOC_009764	PSS31458.1Isoaspartyl peptidase/L-asparaginase 2 subunit beta like
XLOC_009877	RVX01001.1Pectinesterase 2
XLOC_010266	XP_009790063.1 EGF domain-specific O-linked N-acetylglucosamine transferase-like
XLOC_010850	PSS31774.1UUbiquitin carboxyl-terminal hydrolase FAM188B
XLOC_010982	---NA---
XLOC_011339	PSR89730.1Auxin-responsive protein
XLOC_011831	PSS26236.1Metal tolerance protein 1 short form like
XLOC_012056	NP_001238027.2galactinol synthase
XLOC_012057	NP_001313004.1galactinol synthase 2
XLOC_012064	RVW30126.1Scopoletin glucosyltransferase
XLOC_012298	PSS30727.1Cytochrome P450 87A3 like
XLOC_012308	CDY19064.1 BnaA04g18040D
XLOC_012348	XP_027112400.1protein DMR6-LIKE OXYGENASE 2-like
XLOC_012648	PSR93609.1Ankyrin repeat-containing protein
XLOC_013001	PSS09876.1Protein like
XLOC_013337	XP_018844047.1 crocetin glucosyltransferase, chloroplastic-like
XLOC_013634	EOY00903.1 Mediator of RNA polymerase II transcription subunit 18, putative
XLOC_013694	XP_010260609.1 scopoletin glucosyltransferase-like
XLOC_013761	PSS02755.1Receptor-like protein kinase
XLOC_013932	XP_024449125.1ankyrin repeat-containing protein At5g02620
XLOC_013971	PSS24289.1FT-interacting protein
XLOC_014130	XP_010664542.1PREDICTED: uncharacterized protein LOC104882531
XLOC_014242	AMT82756.1Rab 15
XLOC_014338	PSR97927.1Protein phosphatase 2C-like protein
XLOC_014644	PSS34282.1Late embryogenesis abundant protein
XLOC_014907	PSS24314.1NADPH:quinone oxidoreductase
XLOC_015052	---NA---
XLOC_015095	PSS34582.1Aldo-keto reductase
XLOC_015099	XP_018844047.1 crocetin glucosyltransferase, chloroplastic-like
XLOC_015103	XP_018844047.1 crocetin glucosyltransferase, chloroplastic-like
XLOC_015108	AUM57505.1anthocyanidin 3-O-glucosyltransferase
XLOC_015460	NP_001312598.19-cis-epoxycarotenoid dioxygenase NCED1, chloroplastic-like
XLOC_015462	NP_001312598.19-cis-epoxycarotenoid dioxygenase NCED1, chloroplastic-like
XLOC_015794	PQQ20239.1EG45-like domain containing protein
XLOC_015897	PSS11977.1G-type lectin S-receptor-like serine/threonine-protein kinase
XLOC_015943	PSS24314.1NADPH:quinone oxidoreductase
XLOC_016085	AEM62884.1ACC oxidase 5
XLOC_016252	PSS06338.1Auxin-induced protein like
XLOC_016267	PNT27178.1hypothetical protein POPTR_007G049500
XLOC_016430	XP_016559803.1 trans-resveratrol di-O-methyltransferase-like
XLOC_016431	XP_016559803.1 trans-resveratrol di-O-methyltransferase-like
XLOC_016466	---NA---
XLOC_016508	NP_001305525.1galactinol synthase 2
XLOC_016637	ONI31659.1hypothetical protein PRUPE_1G324000
XLOC_016905	RVW70404.1Crocetin glucosyltransferase, chloroplastic
XLOC_017175	PSS11977.1G-type lectin S-receptor-like serine/threonine-protein kinase
XLOC_017518	PSS29354.1Carboxylesterase 12
XLOC_017797	---NA---
XLOC_017820	XP_022865653.1LEAF RUST 10 DISEASE-RESISTANCE LOCUS RECEPTOR-LIKE PROTEIN KINASE-like 1.3 isoform X4
XLOC_017904	PSS23965.1Acyl-activating enzyme like
XLOC_018014	RVX09168.1putative cinnamyl alcohol dehydrogenase 1
XLOC_018029	---NA---
XLOC_018271	RVW34572.1U-box domain-containing protein 21
XLOC_018401	XP_010655476.1 pathogenesis-related genes transcriptional activator PTI5
XLOC_018467	PSR91347.1Abscisic acid 8'-hydroxylase
XLOC_018831	AZL56934.1auxin-responsive protein
XLOC_018866	PSS18992.1TVP38/TMEM64 family membrane protein like
XLOC_019018	APA20280.1nitrate transporter 1:2
XLOC_019738	PSS16441.1Glutaredoxin-C9 like
XLOC_019951	PSS32357.1Late embryogenesis abundant protein
XLOC_019953	PSS34282.1Late embryogenesis abundant protein
XLOC_019976	XP_023878434.1isoflavone reductase homolog PCBER-like
XLOC_020193	RVW65883.1Chitinase 2
XLOC_020461	PQP97490.1PRA1 family protein F4-like
XLOC_020693	---NA---
XLOC_021661	PSS32357.1Late embryogenesis abundant protein
XLOC_021760	PSS16048.1Glutathione S-transferase
XLOC_021837	PSR87926.1BTB/POZ and TAZ domain-containing protein
XLOC_021875	PSR91181.1IST1 like
XLOC_022006	PON60565.1inactive purple acid phosphatase-like protein
XLOC_022109	PSR92700.1Sugar transport protein
XLOC_022167	XP_002514552.1basic leucine zipper 43
XLOC_022218	PSS32880.1Transcription factor like
XLOC_022225	PSS35726.1Autophagy-related protein like
XLOC_022482	PSS11500.1Lipid transfer-like protein
XLOC_022794	PSS29489.1Secretagogin like
XLOC_023012	PSR87926.1BTB/POZ and TAZ domain-containing protein
XLOC_023207	XP_022750614.1AAA-ATPase ASD, mitochondrial-like
XLOC_023431	PSR96924.1Dammarenediol 12-hydroxylase
XLOC_023933	XP_024195046.1probable aldo-keto reductase 3 isoform X2
XLOC_024145	XP_016454830.1 NAD(P)H:quinone oxidoreductase-like
XLOC_024266	PSR84975.1Protein of unknown function DUF1262 protein
XLOC_024285	PSS34418.1Cytochrome c biosynthesis protein
XLOC_024286	PSS34418.1Cytochrome c biosynthesis protein
XLOC_024321	PSS26769.1U-box domain-containing protein
XLOC_024343	XP_017237994.1PREDICTED: uncharacterized protein LOC108211027
XLOC_024454	XP_009785801.1 putative receptor-like protein kinase At4g00960 isoform X1
XLOC_025119	AJO70154.1invertase 4
XLOC_025623	PSS34418.1Cytochrome c biosynthesis protein
XLOC_025709	PSS04865.1LRR receptor-like serine/threonine-protein kinase
XLOC_026018	OMP02348.1DNA-binding WRKY
XLOC_026900	XP_018816685.1 protein GLUTAMINE DUMPER 4-like
XLOC_027279	PSS01415.1Calcium-transporting ATPase 13 plasma membrane-type
XLOC_027495	PSS04743.1Protein PLANT CADMIUM RESISTANCE like
XLOC_027761	PSS02991.1F-box protein
XLOC_027978	NP_001313004.1galactinol synthase 2
XLOC_028354	PSR95481.1Pleiotropic drug resistance protein
XLOC_028355	XP_011088856.1pleiotropic drug resistance protein 2
XLOC_028357	---NA---
XLOC_029234	XP_002282913.1 zinc finger A20 and AN1 domain-containing stress-associated protein 4
XLOC_029483	PSR89724.1Sharpin like
XLOC_030247	PSS04865.1LRR receptor-like serine/threonine-protein kinase
XLOC_030894	PSS13865.1Umecyanin like
XLOC_030896	XP_009794603.1 blue copper protein-like
XLOC_030985	AID51426.1ethylene response factor 21
XLOC_031479	---NA---
XLOC_031988	---NA---
XLOC_032028	XP_019225147.1 peroxisomal (S)-2-hydroxy-acid oxidase-like isoform X1
XLOC_032274	XP_002311369.1transcription factor MYB108
XLOC_032460	AZL19402.1NAC transcription factor
XLOC_032504	ALO19894.1UDP-glycosyltransferase 75L14
XLOC_032772	RVX10566.1Metalloendoproteinase 2-MMP
XLOC_032909	PSR99742.1Trafficking kinesin-binding protein like
XLOC_032945	PSS24732.1G-type lectin S-receptor-like serine/threonine-protein kinase
XLOC_033242	PSR93139.1Wall-associated receptor kinase-like
XLOC_033454	PSR93515.1Haloacid dehalogenase-like hydrolase domain-containing protein
XLOC_033530	PSR86669.1ATP synthase subunit b like
XLOC_033548	RVW65672.1Receptor-like protein kinase HAIKU2
XLOC_033621	XP_009348279.1 sigma factor binding protein 2, chloroplastic
XLOC_033707	PSS33476.1Lysine histidine transporter like
XLOC_033729	XP_002279225.1 F-box protein PP2-B15
XLOC_034299	XP_023904424.1dirigent protein 19-like
XLOC_034300	XP_023904424.1dirigent protein 19-like
XLOC_034357	XP_021597983.1phospholipase A1-IIgamma-like
XLOC_034591	PSS07949.1LRR receptor-like serine/threonine-protein kinase
XLOC_034670	PSS16459.1Transcription factor bHLH30 like
XLOC_034681	PSS19746.1Subtilisin-like protease
XLOC_034969	PSS34476.1Regulatory protein
XLOC_034994	PSR91142.13-dehydroquinate synthase
XLOC_034997	---NA---
XLOC_035077	PSS26823.1D-galacturonate reductase
XLOC_035403	---NA---
XLOC_035462	XP_023923443.1protein DETOXIFICATION 40
XLOC_035561	XP_002284133.1 auxin-responsive protein IAA14
XLOC_035766	PSS11166.1LRR receptor-like serine/threonine-protein kinase precursor
XLOC_035806	PSS26903.1BTB/POZ domain-containing protein
XLOC_035950	PSS21004.1Cortactin-binding protein like
XLOC_036129	PSR86275.1LRR receptor-like serine/threonine-protein kinase
XLOC_036386	PSS34282.1Late embryogenesis abundant protein
XLOC_036480	---NA---
XLOC_037674	PSS08438.1Lamin tail domain-containing protein
XLOC_037805	XP_022858106.1universal stress protein PHOS32-like
XLOC_037915	---NA---
XLOC_037957	PSR95216.14-coumarate--CoA ligase-like
XLOC_037976	EEF36931.1short-chain type dehydrogenase, putative
XLOC_037981	EEF36931.1short-chain type dehydrogenase, putative
XLOC_038031	XP_010251606.1 late embryogenesis abundant protein At1g64065-like
XLOC_038345	PSR86464.1F-box protein
XLOC_038584	PSR91224.1Phospholipid-transporting ATPase 9
XLOC_038636	PSS30175.1UPF0711 protein like
XLOC_038798	PSS01251.1G-type lectin S-receptor-like serine/threonine-protein kinase
XLOC_039071	PSS08277.1Alpha,alpha-trehalose-phosphate synthase
XLOC_039326	PSS33261.1Adenine/guanine permease
XLOC_039445	AGN70869.1O-methyltransferase OMT2
XLOC_039492	XP_002315448.2copper transport protein ATX1
XLOC_039643	PSS32677.1BAHD acyltransferase
XLOC_039693	AID51418.1ethylene response factor 13
XLOC_039772	PSS33014.1S-type anion channel like
XLOC_040934	PSR88180.1T-cell surface glycoprotein CD8 beta chain like
XLOC_040976	PSS36606.1Protein phosphatase
XLOC_041285	ALO19890.1UDP-glycosyltransferase 84A22
XLOC_041286	ALO19890.1UDP-glycosyltransferase 84A22
XLOC_041438	PSR99558.1FAD-dependent urate hydroxylase
XLOC_041444	ALO19886.1UDP-glycosyltransferase 73A20
XLOC_041943	POO01999.1Transmembrane protein
XLOC_042083	PSR90911.1D-galacturonate reductase
XLOC_042086	PSR90911.1D-galacturonate reductase
XLOC_042261	PSS31896.1Aspartic proteinase
XLOC_042568	XP_023880203.1VQ motif-containing protein 20-like
XLOC_043167	PSS34942.1Diacylglycerol kinase
XLOC_043482	PSR88287.1UV excision repair protein
XLOC_043493	PSS23567.1NDR1/HIN1-Like protein
XLOC_043923	PSR93134.1Protein phosphatase
XLOC_044391	ACI22425.1pericarp peroxidase 3
XLOC_044441	EOY15857.1 Poly polymerase 1, putative
XLOC_044442	XP_021284863.1protein MIZU-KUSSEI 1-like
XLOC_044597	PSS20988.1WRKY transcription factor
XLOC_044999	PSS14379.1Potassium transporter like
XLOC_045086	AYW51595.1mitochondrial alternative oxidase 1d
XLOC_045100	PSS24058.1Protein tweety-2 like
XLOC_045295	PSR87765.1Sclerostin like
XLOC_046247	PSR87732.1Phenolic glucoside malonyltransferase
XLOC_046357	PSS14014.1Actin-depolymerizing factor like
XLOC_047464	XP_027079432.1F-box protein At5g46170-like
XLOC_047469	XP_027079432.1F-box protein At5g46170-like
XLOC_047509	PSS32440.1Hexose carrier protein
XLOC_047560	XP_015898009.1probable auxin efflux carrier component 1b
XLOC_047635	PSR84842.1Actin cytoskeleton-regulatory complex protein
XLOC_047999	PSS15501.1IQ domain-containing protein
XLOC_048011	CAI56334.1 TPA: isoflavone reductase-like protein 5

## Sheet: GROUP B
2381 elements ARS1 specific rooting B
XLOC_000003	RHN43924.1 putative Transposase-associated domain-containing protein
XLOC_000005	XP_018859967.1PREDICTED: uncharacterized protein LOC109021722
XLOC_000007	---NA---
XLOC_000011	---NA---
XLOC_000013	---NA---
XLOC_000027	---NA---
XLOC_000052	---NA---
XLOC_000056	GAV83563.1UBN2_3 domain-containing protein
XLOC_000058	---NA---
XLOC_000059	XP_022891863.1uncharacterized protein LOC111406714
XLOC_000069	---NA---
XLOC_000080	RVW85211.1Copia protein
XLOC_000088	---NA---
XLOC_000092	RVW11905.1Transposon Tf2-2 polyprotein
XLOC_000102	CAC95126.1gag-pol polyprotein
XLOC_000125	XP_021888238.150S ribosomal protein L27, chloroplastic
XLOC_000162	---NA---
XLOC_000204	VDD14030.1unnamed protein product
XLOC_000221	RVW15580.1putative ribonuclease H protein
XLOC_000233	KYP41064.1Retrovirus-related Pol polyprotein from transposon TNT 1-94
XLOC_000234	XP_027097338.1piezo-type mechanosensitive ion channel homolog isoform X1
XLOC_000238	KYP34729.1Retrovirus-related Pol polyprotein from transposon TNT 1-94
XLOC_000243	RVW60234.1Transposon Tf2-12 polyprotein
XLOC_000249	PSS21386.1BES1/BZR1 protein
XLOC_000287	QAV58374.1DNA-directed RNA polymerase alpha subunit (chloroplast)
XLOC_000319	---NA---
XLOC_000367	RVW76592.1Retrovirus-related Pol polyprotein from transposon TNT 1-94
XLOC_000368	RVW73560.1Retrovirus-related Pol polyprotein from transposon TNT 1-94
XLOC_000372	---NA---
XLOC_000385	PSR89696.1Serine/threonine-protein kinase
XLOC_000420	PSS19728.1F-box protein
XLOC_000426	PSS19728.1F-box protein
XLOC_000444	EXC28017.1putative tRNA(His) guanylyltransferase
XLOC_000448	XP_027119589.1uncharacterized protein LOC113736714 isoform X2
XLOC_000483	RWR94899.1ataxia telangiectasia mutated family protein
XLOC_000544	PKA60107.1Retrovirus-related Pol polyprotein from transposon TNT 1-94
XLOC_000565	EOX94044.1DNA/RNA polymerases superfamily protein
XLOC_000566	RVX23000.1LINE-1 reverse transcriptase-like
XLOC_000576	RVW44475.1Transposon TX1 uncharacterized 149 kDa protein
XLOC_000582	PSR91090.1Multicopper oxidase
XLOC_000626	GAV83563.1UBN2_3 domain-containing protein
XLOC_000644	KYP34423.1Retrovirus-related Pol polyprotein LINE-1
XLOC_000648	PSS21661.1Glutathione S-transferase zeta class like
XLOC_000656	---NA---
XLOC_000667	XP_009361810.1 molybdenum cofactor sulfurase isoform X1
XLOC_000707	XP_018810463.1PREDICTED: uncharacterized protein LOC108983323, partial
XLOC_000768	---NA---
XLOC_000771	---NA---
XLOC_000813	XP_022768069.1UDP-sugar pyrophosphorylase-like isoform X5
XLOC_000857	RVW19678.1Structural maintenance of chromosomes protein 3
XLOC_000876	AQK94237.1O-fucosyltransferase family protein
XLOC_000897	KYP71220.1Retrovirus-related Pol polyprotein from transposon TNT 1-94
XLOC_000912	XP_020202578.1craniofacial development protein 2-like
XLOC_000915	CAC95126.1gag-pol polyprotein
XLOC_000936	PSS30107.1Kinesin-like protein
XLOC_000986	PSR93353.1Pentatricopeptide repeat-containing protein
XLOC_001023	XP_011047056.1 TATA-binding protein-associated factor BTAF1 isoform X1
XLOC_001029	XP_011013494.1 disease resistance RPP13-like protein 4
XLOC_001057	PSR84598.1Rho GTPase-activating protein
XLOC_001067	---NA---
XLOC_001074	RVW36762.1Retrovirus-related Pol polyprotein from transposon RE1
XLOC_001075	---NA---
XLOC_001083	XP_010267625.1 calcineurin B-like protein 7
XLOC_001113	OVA12634.1Auxin-induced protein
XLOC_001114	OVA12634.1Auxin-induced protein
XLOC_001134	PSS24865.1Trihelix transcription factor
XLOC_001157	---NA---
XLOC_001159	---NA---
XLOC_001170	KYP56875.1Retrovirus-related Pol polyprotein LINE-1
XLOC_001213	---NA---
XLOC_001235	PSS01845.1Vacuolar protein sorting-associated protein like
XLOC_001236	---NA---
XLOC_001242	PSS21544.1Pentatricopeptide repeat-containing protein
XLOC_001256	KOM33130.1hypothetical protein LR48_Vigan01g268600
XLOC_001288	---NA---
XLOC_001315	---NA---
XLOC_001342	EOY19680.1Integrase, putative
XLOC_001348	XP_027114916.1ATP-citrate synthase alpha chain protein 2-like
XLOC_001368	PSS32985.1hypothetical protein CEY00_Acc03281
XLOC_001399	PIN14744.1UDP-glucuronosyl and UDP-glucosyl transferase
XLOC_001409	XP_019237100.1 17.3 kDa class II heat shock protein-like
XLOC_001448	XP_021643464.1uncharacterized protein LOC110637593 isoform X1
XLOC_001524	PSS20927.1Tetratricopeptide repeat protein
XLOC_001540	XP_024927201.1cytochrome P450 704C1-like isoform X2
XLOC_001564	---NA---
XLOC_001565	RVW50129.1Retrovirus-related Pol polyprotein from transposon RE1
XLOC_001579	RVW27688.1Retrovirus-related Pol polyprotein from transposon RE1
XLOC_001589	---NA---
XLOC_001682	---NA---
XLOC_001683	---NA---
XLOC_001702	PSS00139.1G-type lectin S-receptor-like serine/threonine-protein kinase
XLOC_001743	RVW42024.1Methyltransferase-like protein 1
XLOC_001752	RVX23459.1Retrovirus-related Pol polyprotein from transposon TNT 1-94
XLOC_001791	KYP34729.1Retrovirus-related Pol polyprotein from transposon TNT 1-94
XLOC_001795	XP_027181703.1probable LRR receptor-like serine/threonine-protein kinase At3g47570
XLOC_001834	GAV58409.1zf-CCHC domain-containing protein/DUF4219 domain-containing protein/UBN2 domain-containing protein
XLOC_001866	---NA---
XLOC_001870	RVW66755.1Retrovirus-related Pol polyprotein from transposon RE2
XLOC_001901	PHT60200.1Clustered mitochondria protein
XLOC_001902	---NA---
XLOC_001906	RLN04959.1Retrovirus-related Pol polyprotein LINE-1
XLOC_001909	---NA---
XLOC_001964	---NA---
XLOC_001990	XP_024571437.1atp synthase subunit beta
XLOC_001991	VDN56303.1unnamed protein product
XLOC_002049	XP_011074957.1FT-interacting protein 1
XLOC_002086	---NA---
XLOC_002097	PSS17340.1E3 ubiquitin-protein like
XLOC_002171	OVA10864.1Pentatricopeptide repeat
XLOC_002196	PON72378.1Zinc finger, CCHC-type
XLOC_002197	---NA---
XLOC_002235	XP_023911852.1peroxisomal adenine nucleotide carrier 1-like
XLOC_002257	PSS33751.1Myotubularin-related protein like
XLOC_002267	RVX02976.1putative ribonuclease H protein
XLOC_002272	PSS17344.1Protein SABRE like
XLOC_002273	RVW20953.1LINE-1 retrotransposable element ORF2 protein
XLOC_002283	EOX91647.1Acetamidase/Formamidase family protein isoform 2
XLOC_002298	PSR96967.1Ethylene-responsive transcription factor RAP2-12 like
XLOC_002413	---NA---
XLOC_002430	---NA---
XLOC_002471	BAT02007.1Os07g0546150, partial
XLOC_002509	XP_017247923.1 ankyrin repeat-containing protein At3g12360
XLOC_002531	PWA81295.1transposon Ty3-I Gag-Pol polyprotein
XLOC_002542	RWR94899.1ataxia telangiectasia mutated family protein
XLOC_002551	RVW93419.1Transposon Tf2-12 polyprotein
XLOC_002555	KYP34423.1Retrovirus-related Pol polyprotein LINE-1
XLOC_002556	XP_023915578.1F-box protein PP2-B10-like
XLOC_002562	XP_027112556.1probable LRR receptor-like serine/threonine-protein kinase At4g37250
XLOC_002578	OMO98613.1reverse transcriptase
XLOC_002590	XP_027101865.1LOB domain-containing protein 25-like
XLOC_002641	RVW41542.1LINE-1 reverse transcriptase-like
XLOC_002642	---NA---
XLOC_002647	---NA---
XLOC_002659	---NA---
XLOC_002668	PSS12141.1LysM domain-containing GPI-anchored protein like
XLOC_002698	---NA---
XLOC_002759	---NA---
XLOC_002765	XP_012081620.1lanC-like protein GCL1
XLOC_002778	XP_024314247.1mediator of RNA polymerase II transcription subunit 27 isoform X1
XLOC_002796	---NA---
XLOC_002802	RVW97619.1Transposon TX1 uncharacterized 149 kDa protein
XLOC_002803	RVW97619.1Transposon TX1 uncharacterized 149 kDa protein
XLOC_002836	---NA---
XLOC_002887	---NA---
XLOC_002888	---NA---
XLOC_002906	---NA---
XLOC_002914	KYP41064.1Retrovirus-related Pol polyprotein from transposon TNT 1-94
XLOC_003045	---NA---
XLOC_003098	KYP58728.1Retrovirus-related Pol polyprotein from transposon TNT 1-94
XLOC_003121	AXF74604.1zinc finger protein CONSTANS-LIKE 4
XLOC_003138	XP_018825537.1PREDICTED: uncharacterized protein LOC108994682
XLOC_003139	---NA---
XLOC_003224	EOY07291.18-amino-7-oxononanoate synthase
XLOC_003243	GAV92612.1DUF4283 domain-containing protein/zf-CCHC_4 domain-containing protein
XLOC_003246	RDX69481.1hypothetical protein CR513_51399, partial
XLOC_003249	---NA---
XLOC_003250	EXB99124.1G-type lectin S-receptor-like serine/threonine-protein kinase
XLOC_003270	EOY23098.1Retrotransposon, unclassified-like protein
XLOC_003328	PSS32313.1Lysine-specific demethylase
XLOC_003366	PON66942.1Pol-like polyprotein/retrotransposon
XLOC_003379	PSS33494.1Cytochrome P450 94A1 like
XLOC_003399	PSS11759.1TATA-binding protein-associated factor like
XLOC_003401	OWM72074.1hypothetical protein CDL15_Pgr017957
XLOC_003460	FAA01221.1TPA: polyprotein
XLOC_003482	PSS19046.1Receptor-like protein kinase
XLOC_003487	XP_010659256.1 zinc finger CCCH domain-containing protein 53 isoform X1
XLOC_003488	---NA---
XLOC_003498	RWR94899.1ataxia telangiectasia mutated family protein
XLOC_003500	---NA---
XLOC_003556	PSR97889.1Ubiquitin-conjugating enzyme E2 23
XLOC_003606	RVX01041.1Transposon TX1 uncharacterized 149 kDa protein
XLOC_003607	PRQ29559.1putative nucleotidyltransferase, Ribonuclease H
XLOC_003624	---NA---
XLOC_003625	PKU74657.1integrator complex subunit 11
XLOC_003664	---NA---
XLOC_003671	KYP63559.1Retrovirus-related Pol polyprotein from transposon TNT 1-94
XLOC_003679	KYP41064.1Retrovirus-related Pol polyprotein from transposon TNT 1-94
XLOC_003744	RVW98896.1Retrovirus-related Pol polyprotein from transposon 297
XLOC_003763	---NA---
XLOC_003771	XP_016708270.1 metallocarboxypeptidase A-like protein MCYG_01475 isoform X2
XLOC_003790	RVW19353.1Retrovirus-related Pol polyprotein from transposon RE2
XLOC_003795	AEL30371.1TIR-NBS-LRR type disease resistance protein
XLOC_003798	RHN51461.1putative RNA-directed DNA polymerase
XLOC_003801	PSS07269.1Tyrosine-sulfated glycopeptide receptor like
XLOC_003823	PSR85011.1Phosphatidylinositol 4-kinase
XLOC_003824	PSR85011.1Phosphatidylinositol 4-kinase
XLOC_003844	RVW82433.1Transposon TX1 uncharacterized 149 kDa protein
XLOC_003868	PSR93160.17-deoxyloganetic acid glucosyltransferase
XLOC_003869	PSR93160.17-deoxyloganetic acid glucosyltransferase
XLOC_003872	XP_027095883.118.5 kDa class I heat shock protein-like
XLOC_003901	PSS24168.1Zinc finger protein
XLOC_003902	PSS18167.1Mitogen-activated protein kinase
XLOC_003920	PSR95797.1Expansin-A15 like
XLOC_003937	PSS11759.1TATA-binding protein-associated factor like
XLOC_003946	---NA---
XLOC_003949	GAV69859.1UBN2_3 domain-containing protein
XLOC_003950	---NA---
XLOC_004010	PSR85158.1Protein YeeZ like
XLOC_004016	GAV87358.1dsrm domain-containing protein
XLOC_004026	RVX12219.1LINE-1 retrotransposable element ORF2 protein
XLOC_004065	RVX19851.1Transposon TX1 uncharacterized 149 kDa protein
XLOC_004138	RVW42450.1Transposon TX1 uncharacterized 149 kDa protein
XLOC_004141	RVW42450.1Transposon TX1 uncharacterized 149 kDa protein
XLOC_004184	RVW47858.1Retrovirus-related Pol polyprotein from transposon TNT 1-94
XLOC_004229	PSS04490.1CDPK-related kinase
XLOC_004251	AEL30371.1TIR-NBS-LRR type disease resistance protein
XLOC_004252	XP_008777946.1uncharacterized protein LOC103697792
XLOC_004267	OMO98613.1reverse transcriptase
XLOC_004285	RWR75306.1AP2-like protein ethylene-responsive transcription factor AIL5
XLOC_004305	---NA---
XLOC_004306	---NA---
XLOC_004307	---NA---
XLOC_004370	RVW96201.1Transposon Ty3-G Gag-Pol polyprotein
XLOC_004371	RVW66374.1Retrovirus-related Pol polyprotein from transposon 17.6
XLOC_004420	---NA---
XLOC_004422	---NA---
XLOC_004514	PSR90986.1MAP3K epsilon protein kinase
XLOC_004518	PKA61482.1putative mitochondrial protein
XLOC_004520	---NA---
XLOC_004521	---NA---
XLOC_004560	RVW44022.1Mechanosensitive ion channel protein 10
XLOC_004590	PSR95121.1U-box domain-containing protein
XLOC_004613	RWR75099.1Reverse transcriptase zinc-binding domain-containing protein
XLOC_004615	PSR84537.1Potassium channel like
XLOC_004669	---NA---
XLOC_004673	XP_010245679.1 protein LUTEIN DEFICIENT 5, chloroplastic-like isoform X1
XLOC_004724	PSS30198.1TBCC domain-containing protein
XLOC_004849	PNX86003.1retrotransposon protein
XLOC_004859	PSS00162.1Protein disulfide-isomerase
XLOC_004887	---NA---
XLOC_004896	PSR84979.1Transmembrane emp24 domain-containing protein
XLOC_004917	XP_004234972.1phytolongin Phyl2.1
XLOC_004983	PSS09511.1Serine/threonine-protein kinase
XLOC_005000	---NA---
XLOC_005021	AQK66479.1Retrovirus-related Pol polyprotein LINE-1
XLOC_005034	XP_018732840.1 mitotic checkpoint protein BUB3.3
XLOC_005087	XP_018831634.1PREDICTED: uncharacterized protein LOC108999235
XLOC_005090	PSR84888.1Zinc finger protein
XLOC_005094	PNY16248.1glycosyl transferase (glycosyl transferase family 2)
XLOC_005100	PSR99580.1Pathogenesis-related protein like
XLOC_005129	XP_021614021.1sulfate transporter 3.1-like
XLOC_005132	RWR83372.1DUF659 domain-containing protein/Dimer_Tnp_hAT domain-containing protein
XLOC_005134	RVW79564.1Retrovirus-related Pol polyprotein from transposon RE1
XLOC_005135	RVW32397.1Retrovirus-related Pol polyprotein from transposon TNT 1-94
XLOC_005159	---NA---
XLOC_005160	RVX02541.1putative ribonuclease H protein
XLOC_005220	PKU80164.1RNA-directed DNA polymerase
XLOC_005224	---NA---
XLOC_005234	---NA---
XLOC_005237	---NA---
XLOC_005254	PSS08008.1Agamous-like MADS-box protein
XLOC_005255	RVW31018.1Retrovirus-related Pol polyprotein from transposon TNT 1-94
XLOC_005256	PWA81295.1transposon Ty3-I Gag-Pol polyprotein
XLOC_005297	---NA---
XLOC_005323	PKA50536.1ataxia telangiectasia mutated family protein
XLOC_005324	AEL30371.1TIR-NBS-LRR type disease resistance protein
XLOC_005325	RVW30881.1Retrovirus-related Pol polyprotein from transposon TNT 1-94
XLOC_005398	XP_009379329.1 cyclin-D5-1
XLOC_005402	PSR87926.1BTB/POZ and TAZ domain-containing protein
XLOC_005423	XP_018858970.1 extensin-2
XLOC_005449	---NA---
XLOC_005470	---NA---
XLOC_005489	---NA---
XLOC_005491	KYP56875.1Retrovirus-related Pol polyprotein LINE-1
XLOC_005492	XP_021685233.1ent-kaur-16-ene synthase, chloroplastic isoform X3
XLOC_005495	RVW92469.1Retrovirus-related Pol polyprotein from transposon RE1
XLOC_005499	RVW69134.1Retrovirus-related Pol polyprotein from transposon TNT 1-94
XLOC_005501	OMO58913.1reverse transcriptase
XLOC_005504	---NA---
XLOC_005506	RWR94899.1ataxia telangiectasia mutated family protein
XLOC_005510	PSS14458.1E3 ubiquitin-protein like
XLOC_005519	---NA---
XLOC_005541	PSR89596.1Immediate early response protein
XLOC_005551	PIN18243.1Ubiquitinyl hydrolase 1
XLOC_005559	EOX94045.1DNA/RNA polymerases superfamily protein
XLOC_005560	CBL94163.1putative RNA-directed DNA polymerase (Reverse transcriptase)
XLOC_005561	KYP63559.1Retrovirus-related Pol polyprotein from transposon TNT 1-94
XLOC_005601	PSR96689.1Protein tincar like
XLOC_005692	XP_019155847.1PREDICTED: uncharacterized protein LOC109152658
XLOC_005725	RVW73986.1Retrovirus-related Pol polyprotein from transposon RE1
XLOC_005732	---NA---
XLOC_005742	PSR96324.1WD repeat-containing protein
XLOC_005760	PKA66820.1putative mitochondrial protein
XLOC_005765	---NA---
XLOC_005787	XP_022881081.1MACPF domain-containing protein At1g14780-like
XLOC_005792	PSR93174.1Acid phosphatase protein
XLOC_005832	XP_022748983.1AT-hook motif nuclear-localized protein 20-like
XLOC_005868	---NA---
XLOC_005873	---NA---
XLOC_005947	---NA---
XLOC_005949	---NA---
XLOC_005950	---NA---
XLOC_005951	---NA---
XLOC_005952	---NA---
XLOC_005953	---NA---
XLOC_005970	---NA---
XLOC_005972	XP_010654393.1 dnaJ homolog subfamily B member 6-A isoform X2
XLOC_005982	PSS00311.1Dynamin-2A like
XLOC_005990	ARB51599.1myb domain protein 4a
XLOC_005997	PSR91359.1JmjC domain-containing protein
XLOC_006076	---NA---
XLOC_006081	XP_018824395.1 zinc finger protein 5
XLOC_006095	GAV83732.1UBN2_3 domain-containing protein
XLOC_006098	---NA---
XLOC_006195	KYP41064.1Retrovirus-related Pol polyprotein from transposon TNT 1-94
XLOC_006196	PKA61057.1putative mitochondrial protein
XLOC_006197	---NA---
XLOC_006271	XP_020208300.1craniofacial development protein 2-like
XLOC_006275	---NA---
XLOC_006298	---NA---
XLOC_006345	PSS17209.1WD40-repeat-containing domain protein
XLOC_006349	PKA47709.1ataxia telangiectasia mutated family protein
XLOC_006361	EOY08376.1DNA/RNA polymerases superfamily protein
XLOC_006363	RVW54082.1Retrovirus-related Pol polyprotein from transposon 297
XLOC_006364	PKU60250.1putative mitochondrial protein
XLOC_006397	---NA---
XLOC_006422	---NA---
XLOC_006457	RVW56838.1LINE-1 reverse transcriptase-like
XLOC_006483	RVW31094.1Retrovirus-related Pol polyprotein from transposon RE1
XLOC_006485	PSR85974.1Ethylene response sensor like
XLOC_006511	PSS26496.1DNA-directed RNA polymerase V subunit like
XLOC_006527	---NA---
XLOC_006529	---NA---
XLOC_006577	---NA---
XLOC_006581	KYP56875.1Retrovirus-related Pol polyprotein LINE-1
XLOC_006582	RVW41741.1Retrovirus-related Pol polyprotein from transposon TNT 1-94
XLOC_006615	PSS01126.1SPX domain-containing protein
XLOC_006631	PSR96102.1Transcription factor E like
XLOC_006649	---NA---
XLOC_006688	---NA---
XLOC_006689	---NA---
XLOC_006690	PKA47469.1Retrovirus-related Pol polyprotein from transposon TNT 1-94
XLOC_006691	RVW32883.1Retrovirus-related Pol polyprotein from transposon RE1
XLOC_006736	---NA---
XLOC_006737	---NA---
XLOC_006738	---NA---
XLOC_006753	PSS32351.1Membrane-associated kinase regulator 6
XLOC_006783	GAV71362.1UBN2_3 domain-containing protein
XLOC_006828	PSR89530.1Ethylene response sensor like
XLOC_006867	PIA56626.1hypothetical protein AQUCO_00700762v1
XLOC_006903	RVW32397.1Retrovirus-related Pol polyprotein from transposon TNT 1-94
XLOC_006905	ABD63193.1gag-pol polyprotein, putative
XLOC_006912	PSS13586.1AMSH-like ubiquitin thioesterase
XLOC_006923	RVX14359.1Retrovirus-related Pol polyprotein from transposon TNT 1-94
XLOC_006927	PSS04310.1Acyl-CoA N-acyltransferase protein
XLOC_006954	PSS01314.1GDSL esterase/lipase
XLOC_006960	RVW42810.1putative mitochondrial adenine nucleotide transporter BTL1
XLOC_006999	XP_011081336.1B3 domain-containing transcription factor NGA1 isoform X1
XLOC_007031	---NA---
XLOC_007052	PWA92720.1reverse transcriptase domain-containing protein
XLOC_007077	PSS23834.1AMP deaminase
XLOC_007084	RVW25953.1Transposon Ty3-I Gag-Pol polyprotein
XLOC_007094	XP_010659256.1 zinc finger CCCH domain-containing protein 53 isoform X1
XLOC_007159	RVW49334.1AT-hook motif nuclear-localized protein 20
XLOC_007199	PSS18184.1F-box/kelch-repeat protein
XLOC_007211	XP_017256027.1 cytochrome P450 720B2
XLOC_007214	XP_011034773.1 calvin cycle protein CP12-3, chloroplastic-like
XLOC_007232	RVX16979.1Growth-regulating factor 1
XLOC_007233	XP_017978102.1 circumsporozoite protein
XLOC_007308	PSS21039.1Zinc finger RNA-binding protein
XLOC_007320	PSS11349.1Cation/H(+) antiporter like
XLOC_007333	---NA---
XLOC_007418	---NA---
XLOC_007435	XP_027152828.1polygalacturonase At1g48100-like
XLOC_007472	XP_022894528.1protein SHI RELATED SEQUENCE 1-like
XLOC_007493	PSR89115.1Ninja-family protein
XLOC_007499	EXC35359.1Retrovirus-related Pol polyprotein from transposon TNT 1-94
XLOC_007540	---NA---
XLOC_007546	---NA---
XLOC_007547	---NA---
XLOC_007551	---NA---
XLOC_007566	GBC10048.1hypothetical protein RclHR1_00930026
XLOC_007592	KYP58728.1Retrovirus-related Pol polyprotein from transposon TNT 1-94
XLOC_007594	RWR94838.1putative mitochondrial protein
XLOC_007597	KYP34729.1Retrovirus-related Pol polyprotein from transposon TNT 1-94
XLOC_007618	EOX95569.1DNA/RNA polymerases superfamily protein
XLOC_007631	PSR84936.1Tetraketide alpha-pyrone reductase
XLOC_007723	KHG10403.1putative mitochondrial chaperone bcs1
XLOC_007725	PSR91314.1General transcriptional corepressor trfA like
XLOC_007778	PSR93103.1S-adenosylmethionine:tRNA ribosyltransferase-isomerase
XLOC_007860	---NA---
XLOC_007861	---NA---
XLOC_007967	---NA---
XLOC_008041	ONM58670.1Retrovirus-related Pol polyprotein LINE-1
XLOC_008053	AYP70315.1endoglucanase 6
XLOC_008059	PSR94971.1Glyoxalase-like domain protein
XLOC_008063	PSR88117.1Cleavage and polyadenylation specificity factor subunit 3-II like
XLOC_008068	---NA---
XLOC_008084	PSR98341.1Phytosulfokine-beta like
XLOC_008088	KYP58900.1Retrovirus-related Pol polyprotein from transposon TNT 1-94
XLOC_008135	---NA---
XLOC_008189	XP_002281889.1 BEL1-like homeodomain protein 4
XLOC_008204	---NA---
XLOC_008205	---NA---
XLOC_008227	XP_018831634.1PREDICTED: uncharacterized protein LOC108999235
XLOC_008266	RHN75281.1putative RNA-directed DNA polymerase
XLOC_008268	---NA---
XLOC_008289	OMP03349.1Zinc finger, CCHC-type
XLOC_008338	PSS01966.1K(+) efflux antiporter 4 like
XLOC_008339	---NA---
XLOC_008372	XP_024164048.1uncharacterized protein LOC112171037
XLOC_008375	---NA---
XLOC_008382	XP_018826772.1 protein SRG1-like
XLOC_008435	PWA66526.1RNA-directed DNA polymerase, eukaryota, Reverse transcriptase zinc-binding domain protein
XLOC_008438	XP_010102792.1protein PMR5
XLOC_008470	XP_007030280.1 germin-like protein subfamily 1 member 13
XLOC_008493	XP_021614483.123.6 kDa heat shock protein, mitochondrial-like
XLOC_008506	RVW93644.1Retrovirus-related Pol polyprotein from transposon RE2
XLOC_008542	XP_023921396.1serine/threonine-protein kinase SRK2E
XLOC_008572	PSR90995.1Tricalbin-3 like
XLOC_008577	PRQ29559.1putative nucleotidyltransferase, Ribonuclease H
XLOC_008580	ABI34329.1Integrase core domain containing protein
XLOC_008583	---NA---
XLOC_008654	PSR95429.1Protein Hook 3 like
XLOC_008686	PSS33860.1Taste receptor type 1 member 2 like
XLOC_008707	XP_002274290.3 cellulose synthase-like protein E6
XLOC_008743	---NA---
XLOC_008779	---NA---
XLOC_008780	---NA---
XLOC_008781	---NA---
XLOC_008783	---NA---
XLOC_008794	XP_019174942.1 E3 ubiquitin-protein ligase CIP8
XLOC_008796	XP_019174942.1 E3 ubiquitin-protein ligase CIP8
XLOC_008806	PIN05436.1Branching enzyme
XLOC_008855	XP_022776304.1receptor protein kinase-like protein ZAR1
XLOC_008889	PSS08435.1Pentatricopeptide repeat-containing protein
XLOC_008917	PSS06286.1Succinate-semialdehyde dehydrogenase
XLOC_008925	RWR94899.1ataxia telangiectasia mutated family protein
XLOC_008982	---NA---
XLOC_009061	---NA---
XLOC_009083	PSS31309.1Jacalin-related lectin like
XLOC_009084	PSS31310.1Cytokinin dehydrogenase
XLOC_009107	RVX08145.1Retrovirus-related Pol polyprotein from transposon TNT 1-94
XLOC_009119	---NA---
XLOC_009132	RVW26133.1Retrovirus-related Pol polyprotein from transposon RE1
XLOC_009153	XP_011098895.150S ribosomal protein L27, chloroplastic
XLOC_009154	---NA---
XLOC_009159	---NA---
XLOC_009240	AEL30371.1TIR-NBS-LRR type disease resistance protein
XLOC_009259	PSS06467.1Nitrile-specifier protein
XLOC_009269	KYP56875.1Retrovirus-related Pol polyprotein LINE-1
XLOC_009286	XP_022889497.1uncharacterized protein LOC111405037
XLOC_009293	XP_011085320.1ubiquitin domain-containing protein 1 isoform X1
XLOC_009310	XP_002279173.2 probable leucine-rich repeat receptor-like protein kinase At1g68400
XLOC_009319	RVW76419.1Retrovirus-related Pol polyprotein from transposon RE1
XLOC_009344	PSS13545.1RNA recognition motif domain protein
XLOC_009357	PSS35133.1SPX domain-containing protein
XLOC_009371	PSR87810.1HEAT repeat-containing protein isoform 2
XLOC_009373	KYP56875.1Retrovirus-related Pol polyprotein LINE-1
XLOC_009397	PSS24831.1NAC domain-containing protein
XLOC_009414	PSR87555.1Glucose-6-phosphate 1-epimerase
XLOC_009422	XP_012459121.1 putative glucose-6-phosphate 1-epimerase isoform X1
XLOC_009498	PSS07699.1Cellulose synthase-like protein
XLOC_009517	---NA---
XLOC_009538	PKA52309.1integrator complex subunit 11
XLOC_009539	RVW27443.1Retrovirus-related Pol polyprotein from transposon RE1
XLOC_009578	---NA---
XLOC_009645	---NA---
XLOC_009646	---NA---
XLOC_009666	---NA---
XLOC_009669	---NA---
XLOC_009673	GAV87838.1RVT_2 domain-containing protein
XLOC_009688	XP_003621089.1thioredoxin H2
XLOC_009699	PSR96695.1Inactive poly [ADP-ribose] polymerase SRO2
XLOC_009710	RVW84538.1Retrovirus-related Pol polyprotein from transposon TNT 1-94
XLOC_009715	XP_020538355.1DExH-box ATP-dependent RNA helicase DExH8 isoform X2
XLOC_009723	---NA---
XLOC_009726	PSS15795.1DNA ligase
XLOC_009757	---NA---
XLOC_009774	PSS29031.1LRR receptor-like serine/threonine-protein kinase
XLOC_009968	---NA---
XLOC_009972	PSS04059.1Scarecrow-like protein
XLOC_010090	---NA---
XLOC_010095	RVW93020.1Retrovirus-related Pol polyprotein from transposon TNT 1-94
XLOC_010118	CAC95126.1gag-pol polyprotein
XLOC_010121	---NA---
XLOC_010131	PSR93430.1Methyl-CpG-binding domain-containing protein
XLOC_010171	---NA---
XLOC_010172	---NA---
XLOC_010221	AAT68778.2manganese superoxide dismutase
XLOC_010239	PNX73744.1gag-pol polyprotein
XLOC_010240	---NA---
XLOC_010242	PSS34653.1Clathrin light chain like
XLOC_010300	OMP02307.1Integrase, catalytic core
XLOC_010301	ABD63092.1Retrotransposon gag protein
XLOC_010303	XP_018805923.1PREDICTED: uncharacterized protein LOC108979669
XLOC_010304	RVW26608.1Retrovirus-related Pol polyprotein from transposon RE1
XLOC_010305	PKA63925.1Retrovirus-related Pol polyprotein from transposon TNT 1-94
XLOC_010323	---NA---
XLOC_010370	XP_021897646.1peroxidase 17
XLOC_010386	---NA---
XLOC_010388	---NA---
XLOC_010472	XP_018809841.1 protein DMR6-LIKE OXYGENASE 2-like
XLOC_010523	XP_012077326.1vacuolar-processing enzyme
XLOC_010586	---NA---
XLOC_010592	PSS11587.1Trihelix transcription factor
XLOC_010595	PSS11587.1Trihelix transcription factor
XLOC_010599	---NA---
XLOC_010600	---NA---
XLOC_010601	---NA---
XLOC_010602	YP_009520196.1hypothetical chloroplast RF15 (chloroplast)
XLOC_010657	RVW72723.1putative ribonuclease H protein
XLOC_010705	XP_021671041.1fasciclin-like arabinogalactan protein 7
XLOC_010706	PON75910.1Ribulose bisphosphate carboxylase, small chain
XLOC_010707	PSS14515.1Formate--tetrahydrofolate ligase
XLOC_010711	---NA---
XLOC_010716	---NA---
XLOC_010718	PSS34606.1UPF0481 protein
XLOC_010734	XP_021899250.1FIP1[V]-like protein
XLOC_010745	OIT28878.1dead-box atp-dependent rna helicase 32
XLOC_010755	PSR87679.1Ribosomal protein L34Ae protein
XLOC_010766	PKU64612.1integrator complex subunit 11
XLOC_010769	---NA---
XLOC_010775	---NA---
XLOC_010782	PSR93096.1Homeobox protein like
XLOC_010866	---NA---
XLOC_010885	RVX02348.1Retrovirus-related Pol polyprotein from transposon RE1
XLOC_010886	KYP34423.1Retrovirus-related Pol polyprotein LINE-1
XLOC_010889	XP_002311773.1polygalacturonase At1g48100
XLOC_010929	XP_024011381.1uncharacterized protein LOC112086641
XLOC_010973	KYP58728.1Retrovirus-related Pol polyprotein from transposon TNT 1-94
XLOC_011047	---NA---
XLOC_011055	XP_016687846.1 probable serine/threonine-protein kinase At4g35230 isoform X1
XLOC_011078	KHN27112.1Callose synthase 9
XLOC_011079	KRH32588.1hypothetical protein GLYMA_10G062000
XLOC_011080	KMZ72114.11,3-beta-glucan synthase
XLOC_011081	---NA---
XLOC_011083	KYP34423.1Retrovirus-related Pol polyprotein LINE-1
XLOC_011085	---NA---
XLOC_011086	OTG14587.1putative reverse transcriptase zinc-binding domain-containing protein
XLOC_011208	PSR95304.1Protein lsd90 like
XLOC_011245	RVW89745.1Retrovirus-related Pol polyprotein from transposon TNT 1-94
XLOC_011259	---NA---
XLOC_011261	XP_023915578.1F-box protein PP2-B10-like
XLOC_011293	PKA61678.1putative mitochondrial protein
XLOC_011375	XP_027061084.1squamosa promoter-binding-like protein 3
XLOC_011380	KYP56875.1Retrovirus-related Pol polyprotein LINE-1
XLOC_011452	---NA---
XLOC_011465	RVW53285.1 Amidase 1
XLOC_011476	---NA---
XLOC_011477	---NA---
XLOC_011478	XP_020553152.1uncharacterized protein LOC105172774
XLOC_011479	AEL30371.1TIR-NBS-LRR type disease resistance protein
XLOC_011507	---NA---
XLOC_011509	RVW70313.1Retrovirus-related Pol polyprotein from transposon TNT 1-94
XLOC_011512	RVW56704.1Retrovirus-related Pol polyprotein from transposon RE1
XLOC_011539	XP_011019014.1 expansin-A8-like
XLOC_011600	XP_011027439.1 UDP-sugar pyrophosphorylase
XLOC_011618	PSS13913.1Interleukin-2 receptor subunit beta like
XLOC_011655	ABA95797.1retrotransposon protein, putative, unclassified
XLOC_011659	CBI19402.3unnamed protein product, partial
XLOC_011660	---NA---
XLOC_011711	PSS36578.1Prolyl 4-hydroxylase
XLOC_011712	PSS36578.1Prolyl 4-hydroxylase
XLOC_011715	PSS30114.1Acyl-activating enzyme like
XLOC_011750	RHN52239.1putative RNA-directed DNA polymerase
XLOC_011763	RVW70296.1Retrovirus-related Pol polyprotein from transposon TNT 1-94
XLOC_011775	---NA---
XLOC_011776	XP_021628602.1E3 ubiquitin ligase BIG BROTHER-related-like isoform X2
XLOC_011808	PSS01583.1Serine/threonine-protein kinase
XLOC_011812	KYP34423.1Retrovirus-related Pol polyprotein LINE-1
XLOC_011813	PSS04278.1Syntaxin-61 like
XLOC_011819	XP_003634430.1 activating signal cointegrator 1 complex subunit 2 isoform X1
XLOC_011825	RVW16467.1Pentatricopeptide repeat-containing protein
XLOC_011841	RVW86926.1Retrovirus-related Pol polyprotein from transposon RE1
XLOC_011887	RVW91047.1Retrovirus-related Pol polyprotein from transposon TNT 1-94
XLOC_011925	---NA---
XLOC_011929	XP_017615187.1 uncharacterized mitochondrial protein AtMg00810-like
XLOC_011939	PSS28717.1LRR receptor-like serine/threonine-protein kinase precursor
XLOC_011966	XP_017234709.1 probable polygalacturonase
XLOC_011973	---NA---
XLOC_011974	---NA---
XLOC_011992	---NA---
XLOC_012001	PSS33793.1Pentatricopeptide repeat-containing protein
XLOC_012002	XP_017257211.1 GDSL esterase/lipase At4g10955-like
XLOC_012003	---NA---
XLOC_012029	PSS14557.1Digestive organ expansion factor like
XLOC_012038	OMO61386.1Ubiquitin-conjugating enzyme, E2
XLOC_012043	RVW71833.1LINE-1 reverse transcriptase-like
XLOC_012049	XP_002283352.1 protein BRASSINAZOLE-RESISTANT 1
XLOC_012080	ONM31803.1Retrovirus-related Pol polyprotein LINE-1
XLOC_012104	---NA---
XLOC_012130	AOR05815.1pectinesterase 1
XLOC_012185	---NA---
XLOC_012188	KYP44825.1Retrovirus-related Pol polyprotein from transposon TNT 1-94
XLOC_012240	PSR88087.1TPR-containing protein
XLOC_012270	---NA---
XLOC_012289	XP_004295713.1PREDICTED: uncharacterized protein LOC101311556
XLOC_012292	RVW98628.1Retrovirus-related Pol polyprotein from transposon TNT 1-94
XLOC_012301	CDP13752.1unnamed protein product
XLOC_012327	---NA---
XLOC_012359	KYP72724.1Retrovirus-related Pol polyprotein from transposon TNT 1-94
XLOC_012398	---NA---
XLOC_012437	PSS12032.1Pentatricopeptide repeat-containing protein
XLOC_012440	PSS24209.1F-box protein
XLOC_012450	PSS13760.1ATP-dependent RNA helicase DDX46
XLOC_012457	XP_027174366.1uncharacterized protein LOC113773978
XLOC_012459	XP_027084980.1amino acid permease 8-like
XLOC_012476	PSR87826.1Futsch light chain LC(f) like
XLOC_012482	---NA---
XLOC_012519	XP_015944828.1arogenate dehydrogenase 1, chloroplastic isoform X1
XLOC_012520	---NA---
XLOC_012538	PKA52309.1integrator complex subunit 11
XLOC_012542	PSS36121.1Latent-transforming growth factor beta-binding protein like
XLOC_012553	XP_010647869.1 transcription factor TGA2.3
XLOC_012554	XP_009802969.1PREDICTED: uncharacterized protein LOC104248423
XLOC_012582	RVW27496.1LINE-1 reverse transcriptase-like
XLOC_012617	XP_010653434.1 transcription factor LAX PANICLE
XLOC_012620	PSR93397.1Ycf20 family protein
XLOC_012627	XP_008238118.1 formamidase-like isoform X1
XLOC_012681	RVW20953.1LINE-1 retrotransposable element ORF2 protein
XLOC_012703	---NA---
XLOC_012817	XP_023898099.1uncharacterized protein LOC112009972
XLOC_012830	RVW33358.1Transposon Ty3-G Gag-Pol polyprotein
XLOC_012842	PSS30683.1Glycosyltransferase 7
XLOC_012846	---NA---
XLOC_012860	PSS34724.1Protein SIEL like
XLOC_012861	PSS23854.1Macrophage migration inhibitory factor like
XLOC_012872	PSR95930.1adenylate kinase
XLOC_012877	PSS21343.1Vacuolar protein sorting-associated protein like
XLOC_012958	XP_019173741.1 putative disease resistance protein RGA4
XLOC_012959	XP_023929303.1putative disease resistance protein RGA3
XLOC_012971	PSS17322.1Receptor-like protein kinase
XLOC_013028	XP_017232455.1 protein PHR1-LIKE 1-like
XLOC_013034	---NA---
XLOC_013035	---NA---
XLOC_013045	PNX95208.1retrovirus-related Pol polyprotein from transposon TNT 1-94
XLOC_013059	PSS02768.114-3-3-like protein
XLOC_013080	---NA---
XLOC_013119	RVX23085.1Transposon TX1 uncharacterized 149 kDa protein
XLOC_013127	---NA---
XLOC_013183	PSS29334.1Ferredoxin--nitrite reductase
XLOC_013187	---NA---
XLOC_013288	---NA---
XLOC_013300	---NA---
XLOC_013329	PON93857.1Ribosomal protein
XLOC_013330	XP_016903443.1 uncharacterized mitochondrial protein AtMg00810-like
XLOC_013338	XP_018844047.1 crocetin glucosyltransferase, chloroplastic-like
XLOC_013363	XP_017979201.1PREDICTED: uncharacterized protein At5g39570 isoform X2
XLOC_013366	---NA---
XLOC_013400	KYP41064.1Retrovirus-related Pol polyprotein from transposon TNT 1-94
XLOC_013429	PSS35048.1OTU domain-containing protein
XLOC_013433	KYP34423.1Retrovirus-related Pol polyprotein LINE-1
XLOC_013440	XP_022747477.1DNA excision repair protein ERCC-1 isoform X2
XLOC_013511	---NA---
XLOC_013525	PSS31545.1Rhamnogalacturonate lyase
XLOC_013560	---NA---
XLOC_013562	XP_027097338.1piezo-type mechanosensitive ion channel homolog isoform X1
XLOC_013564	---NA---
XLOC_013582	EOY04465.1RING/U-box superfamily protein isoform 1
XLOC_013612	PSS13886.1General transcription factor 3C polypeptide 3 like
XLOC_013626	PSS18212.1Vesicle-associated membrane protein
XLOC_013642	PSR89096.1Transcription factor like
XLOC_013643	RVX13390.1Retrovirus-related Pol polyprotein from transposon RE1
XLOC_013650	PSS01924.13-hydroxyisobutyrate dehydrogenase-like
XLOC_013680	PSS29487.1Auxin-responsive protein
XLOC_013687	---NA---
XLOC_013717	PSS07377.1Protein EARLY FLOWERING like
XLOC_013736	PSS16141.1Aspartic proteinase
XLOC_013737	AHB32105.1aspartic proteinase
XLOC_013783	RVW97359.1Retrovirus-related Pol polyprotein from transposon RE1
XLOC_013787	PKU60330.1RNA-directed DNA polymerase
XLOC_013788	XP_017255857.1 transposon Ty3-I Gag-Pol polyprotein isoform X1
XLOC_013789	---NA---
XLOC_013876	YP_009159802.1Ycf68 protein (chloroplast)
XLOC_013877	CBL94163.1putative RNA-directed DNA polymerase (Reverse transcriptase)
XLOC_013910	XP_011005462.1 staphylococcal-like nuclease CAN2
XLOC_013918	XP_004298866.1 2-alkenal reductase (NADP(+)-dependent)-like
XLOC_013978	XP_018860637.1 mitogen-activated protein kinase homolog NTF6-like
XLOC_013999	PSR96247.1Cytochrome P450 71D10 like
XLOC_014014	ONM06616.1Retrovirus-related Pol polyprotein LINE-1
XLOC_014108	RVX23459.1Retrovirus-related Pol polyprotein from transposon TNT 1-94
XLOC_014148	RDX73611.1Orf V
XLOC_014184	XP_021674520.1snakin-2-like isoform X1
XLOC_014238	XP_002514230.1NADP-dependent malic enzyme
XLOC_014310	AJU57227.1sugar transport protein 5
XLOC_014330	PSS24038.1Feruloyl esterase A precursor
XLOC_014356	XP_019233445.1 DNA topoisomerase 3-alpha-like
XLOC_014382	PNX95208.1retrovirus-related Pol polyprotein from transposon TNT 1-94
XLOC_014384	XP_023910746.1uncharacterized protein LOC112022388
XLOC_014478	PSS02923.14-hydroxy-7-methoxy-3-oxo-3,4-dihydro-2H-1, 4-benzoxazin-2-yl glucoside beta-D-glucosidase
XLOC_014500	PSS31576.1BEACH domain-containing protein
XLOC_014502	RVX03908.1putative ribonuclease H protein
XLOC_014505	RVW15269.1LINE-1 reverse transcriptase-like
XLOC_014506	RVX18958.1Transposon TX1 uncharacterized 149 kDa protein
XLOC_014507	RVX23000.1LINE-1 reverse transcriptase-like
XLOC_014511	PSR85066.1DUF724 domain-containing protein
XLOC_014515	RVW99117.1Phospholipase D zeta 1
XLOC_014528	XP_002877709.1ADP-ribosylation factor-like protein 8a
XLOC_014562	---NA---
XLOC_014563	---NA---
XLOC_014566	KYP56875.1Retrovirus-related Pol polyprotein LINE-1
XLOC_014567	---NA---
XLOC_014568	---NA---
XLOC_014575	---NA---
XLOC_014605	PIN20244.1Calcium-responsive transcription coactivator
XLOC_014611	XP_021279848.1IRK-interacting protein
XLOC_014649	XP_010264097.1 cyclin-dependent kinase inhibitor 5
XLOC_014657	PSS08294.1Peptide chain release factor 2 like
XLOC_014694	PSR91150.1Glutamine--tRNA ligase
XLOC_014695	---NA---
XLOC_014707	AYP70307.1beta-galactosidase 6
XLOC_014728	XP_006340014.1 FHA domain-containing protein FHA2-like
XLOC_014737	KYP46112.1Retrovirus-related Pol polyprotein from transposon TNT 1-94
XLOC_014751	KYP55651.1Retrovirus-related Pol polyprotein from transposon TNT 1-94
XLOC_014763	PSS24914.1E3 ubiquitin-protein like
XLOC_014768	PSS13608.1F-box protein
XLOC_014794	AFX74875.1MADS domain transcription factor APL2
XLOC_014843	---NA---
XLOC_014849	OMP02307.1Integrase, catalytic core
XLOC_014852	XP_002283079.1 CBS domain-containing protein CBSX1, chloroplastic
XLOC_014888	XP_015877241.1ABC transporter G family member 24-like
XLOC_014949	RVW65750.1Retrovirus-related Pol polyprotein from transposon RE1
XLOC_014952	CBL94165.1putative reverse transcriptase family member
XLOC_014954	RVW65750.1Retrovirus-related Pol polyprotein from transposon RE1
XLOC_014965	KZV43906.1uridine-cytidine kinase C
XLOC_014993	BAB89348.11-aminocyclopropane-1-carboxylate synthase
XLOC_014996	BAB89348.11-aminocyclopropane-1-carboxylate synthase
XLOC_015006	PWA77683.1C1-like protein
XLOC_015025	PSS08454.1L-cysteine desulfhydrase
XLOC_015030	RVW96872.1Transposon TX1 uncharacterized 149 kDa protein
XLOC_015043	XP_012435921.1 BTB/POZ domain-containing protein At1g03010-like isoform X2
XLOC_015065	KYP74314.1Retrovirus-related Pol polyprotein from transposon TNT 1-94
XLOC_015067	---NA---
XLOC_015111	XP_022866509.1alpha-L-fucosidase 1-like
XLOC_015143	---NA---
XLOC_015160	PSS24556.1Non-specific phospholipase
XLOC_015170	PSS24680.1ADP-ribosylation factor GTPase-activating protein AGD5
XLOC_015202	AEL30371.1TIR-NBS-LRR type disease resistance protein
XLOC_015223	---NA---
XLOC_015226	---NA---
XLOC_015267	PSR91150.1Glutamine--tRNA ligase
XLOC_015314	KYP41064.1Retrovirus-related Pol polyprotein from transposon TNT 1-94
XLOC_015315	RVX23571.1Retrovirus-related Pol polyprotein from transposon TNT 1-94
XLOC_015316	CBL94163.1putative RNA-directed DNA polymerase (Reverse transcriptase)
XLOC_015322	KHN06274.1Retrovirus-related Pol polyprotein from transposon TNT 1-94
XLOC_015358	---NA---
XLOC_015360	GAV91993.1zf-RVT domain-containing protein
XLOC_015367	AEJ72569.1putative reverse transcriptase family member
XLOC_015368	PKU64612.1integrator complex subunit 11
XLOC_015384	RVW70899.1LINE-1 retrotransposable element ORF2 protein
XLOC_015385	---NA---
XLOC_015406	PSS01529.1Acetate/butyrate--CoA ligase AAE7, peroxisomal like
XLOC_015407	---NA---
XLOC_015412	PSS28794.1Sterol 24-C-methyltransferase
XLOC_015454	PSS33906.1Mediator of RNA polymerase II transcription subunit 33A like
XLOC_015542	KYP56875.1Retrovirus-related Pol polyprotein LINE-1
XLOC_015557	---NA---
XLOC_015558	---NA---
XLOC_015559	---NA---
XLOC_015574	---NA---
XLOC_015583	---NA---
XLOC_015594	RVW28823.1Retrovirus-related Pol polyprotein from transposon TNT 1-94
XLOC_015596	---NA---
XLOC_015666	RVW88412.1LINE-1 reverse transcriptase-like
XLOC_015679	XP_027067649.1mitogen-activated protein kinase kinase kinase 18-like
XLOC_015685	XP_027097683.1F-box protein At1g67340-like
XLOC_015717	---NA---
XLOC_015737	PSS08454.1L-cysteine desulfhydrase
XLOC_015785	---NA---
XLOC_015793	RVW98603.1Transposon TX1 uncharacterized 149 kDa protein
XLOC_015832	PSR95493.1Release factor glutamine methyltransferase
XLOC_015877	XP_006432439.1aspartyl protease AED3
XLOC_015878	PQM33553.1trihelix transcription factor ASIL2
XLOC_015918	PRQ20008.1putative ribonuclease H-like domain-containing protein
XLOC_015921	---NA---
XLOC_015937	RVW63759.1Retrovirus-related Pol polyprotein from transposon TNT 1-94
XLOC_015938	WP_107647113.1hypothetical protein
XLOC_015951	KYP55818.1Retrovirus-related Pol polyprotein from transposon TNT 1-94
XLOC_015960	---NA---
XLOC_015984	XP_002509785.1glutathione S-transferase T1
XLOC_015999	RWR72228.1Cytidyltransferase-like domain-containing protein
XLOC_016020	---NA---
XLOC_016064	PWA81295.1transposon Ty3-I Gag-Pol polyprotein
XLOC_016067	RVX18473.1putative ribonuclease H protein
XLOC_016089	AZI71050.1pathogenesis-related protein 1
XLOC_016100	RWR75228.1TBC1 domain-containing protein
XLOC_016136	XP_010250123.1 CBL-interacting serine/threonine-protein kinase 24
XLOC_016137	---NA---
XLOC_016150	AEL30371.1TIR-NBS-LRR type disease resistance protein
XLOC_016182	PSS14394.1Leucine-rich repeat receptor-like protein kinase precursor
XLOC_016241	RVW99650.1putative ribonuclease H protein
XLOC_016329	PKU79361.1integrator complex subunit 11
XLOC_016335	XP_021651733.1myb-related protein 306-like
XLOC_016344	PSS19296.1Oligopeptide transporter like
XLOC_016346	PSS29234.1Galectin-3 like
XLOC_016350	---NA---
XLOC_016351	KYP63559.1Retrovirus-related Pol polyprotein from transposon TNT 1-94
XLOC_016352	XP_027097338.1piezo-type mechanosensitive ion channel homolog isoform X1
XLOC_016353	---NA---
XLOC_016357	PSR87887.1Cysteine desulfurase
XLOC_016375	XP_015867679.1auxin-responsive protein SAUR76-like
XLOC_016452	ONM53611.1Retrovirus-related Pol polyprotein LINE-1
XLOC_016487	XP_003537493.1probable inactive receptor-like protein kinase At3g56050
XLOC_016515	AHB32108.1dihydropyrimidinase-like protein
XLOC_016560	---NA---
XLOC_016562	RVW27439.1Retrovirus-related Pol polyprotein from transposon TNT 1-94
XLOC_016563	PSR87682.1Granule-bound starch synthase
XLOC_016631	PKA47709.1ataxia telangiectasia mutated family protein
XLOC_016716	---NA---
XLOC_016756	OVA08061.1Reverse transcriptase zinc-binding domain
XLOC_016757	---NA---
XLOC_016779	XP_023913807.1ferredoxin, root R-B1-like
XLOC_016782	KYP58900.1Retrovirus-related Pol polyprotein from transposon TNT 1-94
XLOC_016793	RVX03908.1putative ribonuclease H protein
XLOC_016842	---NA---
XLOC_016891	PSS35175.1Prolyl 4-hydroxylase
XLOC_016998	XP_027161811.1L-type lectin-domain containing receptor kinase IV.1-like
XLOC_017000	XP_027161811.1L-type lectin-domain containing receptor kinase IV.1-like
XLOC_017001	XP_027106995.1L-type lectin-domain containing receptor kinase IV.1-like
XLOC_017025	XP_018815872.1 probable mitochondrial saccharopine dehydrogenase-like oxidoreductase At5g39410
XLOC_017077	---NA---
XLOC_017140	PSR96094.1Plastidic ATP/ADP-transporter like
XLOC_017173	PSS15652.1Carboxyl-terminal-processing peptidase
XLOC_017178	XP_022846608.1defensin-like protein P322
XLOC_017180	XP_009614488.1 defensin J1-2-like
XLOC_017199	PSS26773.1Aspartic proteinase
XLOC_017225	RVW70296.1Retrovirus-related Pol polyprotein from transposon TNT 1-94
XLOC_017269	XP_012089904.1protease Do-like 7
XLOC_017293	XP_023929612.1zinc finger protein 4-like
XLOC_017323	PKU64679.1ataxia telangiectasia mutated family protein
XLOC_017423	---NA---
XLOC_017443	PSR86120.1E3 ubiquitin-protein like
XLOC_017469	OVA06141.1Ribonuclease H domain
XLOC_017470	---NA---
XLOC_017473	OVA19679.1Reverse transcriptase zinc-binding domain
XLOC_017513	---NA---
XLOC_017514	---NA---
XLOC_017528	RHN51461.1putative RNA-directed DNA polymerase
XLOC_017597	---NA---
XLOC_017633	WP_107647108.1DUF4283 domain-containing protein
XLOC_017634	---NA---
XLOC_017651	---NA---
XLOC_017660	---NA---
XLOC_017705	PSS35817.1H/ACA ribonucleoprotein complex subunit like
XLOC_017712	PSR96908.13-epi-6-deoxocathasterone 23-monooxygenase
XLOC_017755	PSS00175.1GDSL esterase/lipase
XLOC_017770	PSS07444.1Late embryogenesis abundant protein, LEA-14 protein
XLOC_017796	XP_002269615.1 S-type anion channel SLAH1
XLOC_017817	---NA---
XLOC_017818	---NA---
XLOC_017837	PSS13792.1E3 ubiquitin-protein like
XLOC_017866	AAT40504.2Polyprotein, putative
XLOC_017867	RWR94899.1ataxia telangiectasia mutated family protein
XLOC_017870	AXR86867.1hypothetical chloroplast RF21 (chloroplast)
XLOC_017878	XP_006494482.1tRNA-dihydrouridine(16/17) synthase [NAD(P)(+)]-like
XLOC_017886	XP_022717468.1late embryogenesis abundant protein At1g64065-like
XLOC_017935	XP_022895563.1glycine-rich RNA-binding protein RZ1A
XLOC_017940	---NA---
XLOC_017941	---NA---
XLOC_017953	RVW34472.1Retrovirus-related Pol polyprotein from transposon RE2
XLOC_017954	---NA---
XLOC_018009	PSS05658.1Protein strawberry notch like
XLOC_018028	RVW65750.1Retrovirus-related Pol polyprotein from transposon RE1
XLOC_018043	---NA---
XLOC_018081	---NA---
XLOC_018094	PSR88044.1Scarecrow-like protein
XLOC_018109	PSR91133.1Nicotinamide mononucleotide adenylyltransferase
XLOC_018120	XP_010053448.1 protein NRT1/ PTR FAMILY 6.3
XLOC_018140	PSS36264.1Glutamate dehydrogenase
XLOC_018154	PSS24839.1Protein ECERIFERUM like
XLOC_018155	PSS24838.1Protein ECERIFERUM like
XLOC_018176	---NA---
XLOC_018194	---NA---
XLOC_018209	XP_018850465.1 scarecrow-like protein 14
XLOC_018240	---NA---
XLOC_018241	---NA---
XLOC_018269	AAB65787.1plasma membrane intrinsic protein
XLOC_018279	PSS24131.1Non-canonical poly(A) RNA polymerase
XLOC_018330	RVW31016.1LINE-1 retrotransposable element ORF2 protein
XLOC_018352	RVW76062.1Retrovirus-related Pol polyprotein from transposon RE1
XLOC_018354	RVX19039.1Transposon TX1 uncharacterized 149 kDa protein
XLOC_018374	XP_027061528.1LRR receptor-like serine/threonine-protein kinase
XLOC_018446	XP_021638269.1cysteine-rich receptor-like protein kinase 10
XLOC_018505	---NA---
XLOC_018584	GBC10048.1hypothetical protein RclHR1_00930026
XLOC_018620	PKA50536.1ataxia telangiectasia mutated family protein
XLOC_018649	AAL75999.1putative polyprotein
XLOC_018655	PSR93526.1TLDc protein
XLOC_018700	---NA---
XLOC_018729	PSR99548.1Mitochondrial protein import protein
XLOC_018732	XP_016698107.1 dnaJ homolog subfamily B member 13-like
XLOC_018736	RVW17601.1Protein lateral root primordium 1
XLOC_018824	RWR94899.1ataxia telangiectasia mutated family protein
XLOC_018828	GAV67986.1DUF4228 domain-containing protein
XLOC_018838	RVW67625.1Retrovirus-related Pol polyprotein from transposon TNT 1-94
XLOC_018840	RVW93623.1Retrovirus-related Pol polyprotein from transposon RE1
XLOC_018841	---NA---
XLOC_018856	XP_027097338.1piezo-type mechanosensitive ion channel homolog isoform X1
XLOC_018875	PSS30361.1Futsch light chain LC(f) like
XLOC_018930	YP_009526575.1ATPase subunit 1 (mitochondrion)
XLOC_018931	KUM46512.1DNA polymerase (mitochondrion)
XLOC_018962	---NA---
XLOC_018963	XP_006844883.1dnaJ homolog subfamily B member 1
XLOC_018991	---NA---
XLOC_019007	PSR86160.1Pleckstriny domain-containing protein
XLOC_019085	OIT40319.1exocyst complex component sec6
XLOC_019094	XP_021631173.1primary amine oxidase-like
XLOC_019141	PSS35246.1F-box/LRR-repeat protein
XLOC_019163	---NA---
XLOC_019166	---NA---
XLOC_019188	PSS17564.1ATP-dependent RNA helicase ddx42
XLOC_019194	RVW56421.1Retrovirus-related Pol polyprotein from transposon TNT 1-94
XLOC_019197	PSR87869.1Protein RMD5 A like
XLOC_019222	XP_008358139.1 TATA-binding protein-associated factor BTAF1-like isoform X2
XLOC_019223	XP_011047056.1 TATA-binding protein-associated factor BTAF1 isoform X1
XLOC_019226	---NA---
XLOC_019227	XP_008358139.1 TATA-binding protein-associated factor BTAF1-like isoform X2
XLOC_019228	RVX14206.1Retrovirus-related Pol polyprotein from transposon RE1
XLOC_019259	XP_009629528.1 beta-D-glucosyl crocetin beta-1,6-glucosyltransferase-like isoform X1
XLOC_019278	RVW46374.1Transposon TX1 uncharacterized 149 kDa protein
XLOC_019280	XP_016458393.1 protein SULFUR DEFICIENCY-INDUCED 1-like
XLOC_019287	XP_009364180.1PREDICTED: uncharacterized protein LOC103954099 isoform X2
XLOC_019288	---NA---
XLOC_019290	RVW89271.1putative ribonuclease H protein
XLOC_019306	CAC95126.1gag-pol polyprotein
XLOC_019364	PSS05790.1G-type lectin S-receptor-like serine/threonine-protein kinase
XLOC_019365	PSS05790.1G-type lectin S-receptor-like serine/threonine-protein kinase
XLOC_019391	XP_027122555.1putative leucine-rich repeat receptor-like serine/threonine-protein kinase At2g24130
XLOC_019403	---NA---
XLOC_019430	---NA---
XLOC_019435	XP_012852182.1 probable aminotransferase ACS12
XLOC_019442	XP_015887216.1beta-galactosidase 9 isoform X1
XLOC_019455	PKA52309.1integrator complex subunit 11
XLOC_019456	KYP34423.1Retrovirus-related Pol polyprotein LINE-1
XLOC_019484	XP_016648759.1 cysteine-rich receptor-like protein kinase 10
XLOC_019513	---NA---
XLOC_019540	PSS31324.1Auxilin-like protein
XLOC_019573	RVX14062.1Transposon TX1 uncharacterized 149 kDa protein
XLOC_019585	RVW74515.1Retrovirus-related Pol polyprotein from transposon RE2
XLOC_019613	XP_015895666.1probable galacturonosyltransferase-like 3
XLOC_019614	PSR89268.1Extra-large guanine nucleotide-binding protein like
XLOC_019627	XP_010252457.1 S-type anion channel SLAH1-like
XLOC_019629	---NA---
XLOC_019654	XP_015885436.1probable carboxylesterase 2
XLOC_019671	PSS30677.1VQ motif-containing protein
XLOC_019733	KYP41064.1Retrovirus-related Pol polyprotein from transposon TNT 1-94
XLOC_019755	YP_004237279.1ribosomal protein S1 (mitochondrion)
XLOC_019765	---NA---
XLOC_019789	---NA---
XLOC_019815	AOR05813.1beta-galactosidase 8
XLOC_019915	---NA---
XLOC_019940	---NA---
XLOC_019947	---NA---
XLOC_019994	AGN70864.1O-methyltransferase OMT2
XLOC_020016	PSR86692.1Ethylene-responsive transcription factor
XLOC_020038	RVW88342.1Retrovirus-related Pol polyprotein from transposon TNT 1-94
XLOC_020056	PSR99992.1WD40 repeat, conserved site protein
XLOC_020057	---NA---
XLOC_020058	---NA---
XLOC_020095	---NA---
XLOC_020115	---NA---
XLOC_020197	PSR90197.1Pentatricopeptide repeat-containing protein
XLOC_020236	GAV87838.1RVT_2 domain-containing protein
XLOC_020238	XP_021290578.1 putative disease resistance protein RGA1
XLOC_020239	---NA---
XLOC_020253	---NA---
XLOC_020294	PSS29335.1Abscisic acid 8'-hydroxylase
XLOC_020331	PSR95912.1Multidrug resistance protein
XLOC_020350	RWR75228.1TBC1 domain-containing protein
XLOC_020358	---NA---
XLOC_020415	PSR95822.1YLP motif-containing protein
XLOC_020439	---NA---
XLOC_020472	XP_002284038.1 CASP-like protein 3A1
XLOC_020532	PSS25993.1Thaumatin-like protein
XLOC_020548	PSS31852.1Protein DETOXIFICATION like
XLOC_020581	---NA---
XLOC_020677	PSS26185.1Protein EXECUTER 1 like
XLOC_020718	PKA51585.1ataxia telangiectasia mutated family protein
XLOC_020719	KYP63559.1Retrovirus-related Pol polyprotein from transposon TNT 1-94
XLOC_020721	XP_023880760.1protein PHLOEM PROTEIN 2-LIKE A9-like
XLOC_020751	---NA---
XLOC_020832	PKU60330.1RNA-directed DNA polymerase
XLOC_020849	PSS28683.1Transcription factor MYB1R1 like
XLOC_020865	RVW97027.1ERI1 exoribonuclease 2
XLOC_020871	PSR85166.1DnaJ subfamily B member like
XLOC_020875	XP_027097338.1piezo-type mechanosensitive ion channel homolog isoform X1
XLOC_020881	---NA---
XLOC_020893	RVW39635.1Retrovirus-related Pol polyprotein from transposon RE1
XLOC_020910	---NA---
XLOC_020936	PON42168.143kDa postsynaptic protein
XLOC_020937	---NA---
XLOC_020953	PSS07267.1Mitogen-activated protein kinase
XLOC_020968	PKU79361.1integrator complex subunit 11
XLOC_020982	XP_002274290.3 cellulose synthase-like protein E6
XLOC_020983	---NA---
XLOC_020991	---NA---
XLOC_020996	ESR42273.1hypothetical protein CICLE_v10013313mg, partial
XLOC_021003	EOY16048.1Glycosyl hydrolase family protein isoform 1
XLOC_021037	AQK94478.1Putative ubiquitin-conjugating enzyme family
XLOC_021043	XP_002282535.1 beta-hexosaminidase 1
XLOC_021056	---NA---
XLOC_021082	GAV81526.1gag_pre-integrs domain-containing protein/UBN2_3 domain-containing protein
XLOC_021106	XP_016564858.1 pentatricopeptide repeat-containing protein At5g62370
XLOC_021119	---NA---
XLOC_021149	PSS07267.1Mitogen-activated protein kinase
XLOC_021154	PWA87891.1RNA-directed DNA polymerase, eukaryota, Reverse transcriptase zinc-binding domain protein
XLOC_021162	---NA---
XLOC_021163	---NA---
XLOC_021250	KYP56875.1Retrovirus-related Pol polyprotein LINE-1
XLOC_021251	---NA---
XLOC_021315	KYP76032.1Retrovirus-related Pol polyprotein from transposon TNT 1-94
XLOC_021316	RVW50129.1Retrovirus-related Pol polyprotein from transposon RE1
XLOC_021328	XP_009803549.1 fasciclin-like arabinogalactan protein 4
XLOC_021406	AEL30371.1TIR-NBS-LRR type disease resistance protein
XLOC_021407	CBL94163.1putative RNA-directed DNA polymerase (Reverse transcriptase)
XLOC_021410	RVW96915.1Retrovirus-related Pol polyprotein from transposon TNT 1-94
XLOC_021423	XP_019078846.1PREDICTED: uncharacterized protein LOC100252779
XLOC_021468	XP_002266616.2 methylmalonate-semialdehyde dehydrogenase [acylating], mitochondrial
XLOC_021482	XP_021627300.1aspartyl protease AED3-like
XLOC_021486	PSS31447.1Soyasapogenol B glucuronide galactosyltransferase
XLOC_021509	---NA---
XLOC_021530	XP_022730241.1ribulose bisphosphate carboxylase small chain-like isoform X2
XLOC_021548	XP_019192393.1 protein-tyrosine-phosphatase MKP1
XLOC_021558	PRQ29559.1putative nucleotidyltransferase, Ribonuclease H
XLOC_021565	---NA---
XLOC_021580	RVW36518.1Transposon Ty3-I Gag-Pol polyprotein
XLOC_021597	GAV58961.1 Pkinase domain-containing protein/LRR_1 domain-containing protein/RVT_2 domain-containing protein/LRR_8 domain-containing protein
XLOC_021609	PSS09583.1Myb-like protein
XLOC_021692	GAV63787.1UBN2_3 domain-containing protein
XLOC_021694	PRQ29559.1putative nucleotidyltransferase, Ribonuclease H
XLOC_021719	PSS11495.1Primary amine oxidase
XLOC_021731	PSS03027.1MRNA-capping enzyme subunit beta like
XLOC_021773	---NA---
XLOC_021863	RVW83299.1Retrovirus-related Pol polyprotein from transposon RE1
XLOC_021864	XP_016447348.1 uncharacterized mitochondrial protein AtMg00810-like
XLOC_021886	XP_010249474.1 early nodulin-93-like
XLOC_021906	---NA---
XLOC_021955	---NA---
XLOC_021978	EOX91547.1End binding protein 1C isoform 1
XLOC_022052	XP_019149680.1 heat shock protein 83
XLOC_022133	XP_025012290.1uncharacterized protein LOC112533968
XLOC_022154	BAO50884.1ATP synthase F1 subunit 1 (mitochondrion)
XLOC_022166	XP_024994943.1uncharacterized protein LOC112528207
XLOC_022168	---NA---
XLOC_022169	---NA---
XLOC_022189	PSR90053.1Pentatricopeptide repeat-containing protein
XLOC_022202	---NA---
XLOC_022207	PSS08147.130S ribosomal protein
XLOC_022212	RVW49455.1Beta-hexosaminidase 1
XLOC_022290	PSS33797.1Pentatricopeptide repeat-containing protein
XLOC_022295	PSS11247.1Mediator of RNA polymerase II transcription subunit 10b like
XLOC_022320	PSS10269.1hypothetical protein CEY00_Acc17363
XLOC_022322	RVW40927.1Retrovirus-related Pol polyprotein from transposon TNT 1-94
XLOC_022344	XP_019198845.1 myosin heavy chain kinase B-like
XLOC_022362	CAC95126.1gag-pol polyprotein
XLOC_022371	KYP56875.1Retrovirus-related Pol polyprotein LINE-1
XLOC_022467	---NA---
XLOC_022489	PWZ22060.1Craniofacial development protein 2
XLOC_022490	PWZ22060.1Craniofacial development protein 2
XLOC_022514	PSR97895.1Universal stress protein
XLOC_022519	PSR97895.1Universal stress protein
XLOC_022525	---NA---
XLOC_022526	PSS24429.1Disease resistance RPP13-like protein
XLOC_022624	---NA---
XLOC_022633	RVW29975.1Retrovirus-related Pol polyprotein from transposon TNT 1-94
XLOC_022637	PSR96887.1Nuclear poly(A) polymerase
XLOC_022645	---NA---
XLOC_022710	RWR94899.1ataxia telangiectasia mutated family protein
XLOC_022743	PSS21457.1Vegetative cell wall protein like
XLOC_022769	---NA---
XLOC_022815	---NA---
XLOC_022843	KYP58728.1Retrovirus-related Pol polyprotein from transposon TNT 1-94
XLOC_022845	KYP34729.1Retrovirus-related Pol polyprotein from transposon TNT 1-94
XLOC_022851	CBL94163.1putative RNA-directed DNA polymerase (Reverse transcriptase)
XLOC_022854	---NA---
XLOC_022855	RVW23988.1Transposon Ty3-I Gag-Pol polyprotein
XLOC_022868	PSS30772.1Geraniol 8-hydroxylase
XLOC_022884	---NA---
XLOC_022893	PSR94824.1Protein indeterminate-domain like
XLOC_022948	PSS09495.1Omega-3 fatty acid desaturase, endoplasmic reticulum like
XLOC_022968	GBC10048.1hypothetical protein RclHR1_00930026
XLOC_023079	YP_009545791.1RNA polymerase beta subunit (chloroplast)
XLOC_023092	XP_027077129.1UDP-glycosyltransferase 92A1-like
XLOC_023098	PSR89473.1DNA replication regulator like
XLOC_023100	PSR89473.1DNA replication regulator like
XLOC_023106	AGY62835.1orf224 (mitochondrion)
XLOC_023128	---NA---
XLOC_023152	XP_018831634.1PREDICTED: uncharacterized protein LOC108999235
XLOC_023168	---NA---
XLOC_023196	XP_024447951.1uncharacterized protein LOC112325519
XLOC_023199	PSR88326.1DEAD-box ATP-dependent RNA helicase
XLOC_023201	RWR76766.1protein NYNRIN-like protein
XLOC_023219	XP_027768908.1eIF-2-alpha kinase GCN2 isoform X2
XLOC_023220	---NA---
XLOC_023221	---NA---
XLOC_023295	XP_025015683.1protein SKIP34
XLOC_023352	---NA---
XLOC_023382	---NA---
XLOC_023383	---NA---
XLOC_023384	Q5QA71.2RecName: Full=DNA-directed RNA polymerase subunit beta'; AltName: Full=PEP; AltName: Full=Plastid-encoded RNA polymerase subunit beta'; Short=RNA polymerase subunit beta'
XLOC_023385	QAT19588.1ATP synthase CF1 alpha subunit (chloroplast)
XLOC_023390	RVX08739.1putative ribonuclease H protein
XLOC_023391	RVW42450.1Transposon TX1 uncharacterized 149 kDa protein
XLOC_023404	PSR98592.1Dof zinc finger protein like
XLOC_023447	AEJ72569.1putative reverse transcriptase family member
XLOC_023462	KYP41064.1Retrovirus-related Pol polyprotein from transposon TNT 1-94
XLOC_023487	RWR92626.1disease resistance protein TAO1
XLOC_023491	---NA---
XLOC_023527	OTF84779.1putative ribosomal protein L22/L17 (plastid)
XLOC_023610	ACV60359.1putative glucose-6-phosphate/phosphate translocator
XLOC_023641	GAV87838.1RVT_2 domain-containing protein
XLOC_023673	---NA---
XLOC_023760	RVW98461.1Retrovirus-related Pol polyprotein from transposon TNT 1-94
XLOC_023770	XP_027097338.1piezo-type mechanosensitive ion channel homolog isoform X1
XLOC_023800	QAV58400.1hypothetical chloroplast RF1 (chloroplast)
XLOC_023869	XP_021859450.1protein VACUOLELESS1
XLOC_023873	GAV60273.1gag_pre-integrs domain-containing protein/UBN2_3 domain-containing protein
XLOC_023881	PSS09664.1Pentatricopeptide repeat-containing protein
XLOC_023935	XP_024453958.1NAC domain-containing protein 71 isoform X1
XLOC_023936	RVW15342.1NAC domain-containing protein 86
XLOC_023937	---NA---
XLOC_023987	EOY17025.1 Zinc finger and BTB domain-containing protein 11 isoform 1
XLOC_023999	---NA---
XLOC_024038	PKU79659.1Retrovirus-related Pol polyprotein from transposon TNT 1-94
XLOC_024042	XP_021834805.1putative disease resistance protein RGA4 isoform X2
XLOC_024106	RVW42450.1Transposon TX1 uncharacterized 149 kDa protein
XLOC_024110	RVX12389.1LINE-1 reverse transcriptase-like
XLOC_024155	RVW76742.1Retrovirus-related Pol polyprotein from transposon RE1
XLOC_024184	---NA---
XLOC_024206	---NA---
XLOC_024237	PKU74657.1integrator complex subunit 11
XLOC_024262	KYP34423.1Retrovirus-related Pol polyprotein LINE-1
XLOC_024267	AAP59467.1NADH dehydrogenase (chloroplast)
XLOC_024279	PSS11431.1Lethal(3)malignant brain tumor-like protein
XLOC_024283	XP_021617781.1LOB domain-containing protein 15
XLOC_024307	PSR96726.1Quinolinate synthase
XLOC_024326	RWR76766.1protein NYNRIN-like protein
XLOC_024341	PSS09845.1Pair-rule protein like
XLOC_024361	KYP34423.1Retrovirus-related Pol polyprotein LINE-1
XLOC_024363	---NA---
XLOC_024413	XP_012833334.1 glutamine--tRNA ligase
XLOC_024426	RWR80163.1Retrotransposon gag protein
XLOC_024427	---NA---
XLOC_024431	PSS09924.1Disease resistance RPP13-like protein
XLOC_024439	PSR89226.1Plant intracellular Ras-group-related LRR protein
XLOC_024517	PSS24241.1Phosphatidyl-myo-inositol mannosyltransferase
XLOC_024537	RVW73600.1putative ribonuclease H protein
XLOC_024552	AZI71056.1regulatory protein NPR1
XLOC_024562	ABF81427.1TIR-NBS-LRR-TIR type disease resistance protein
XLOC_024569	XP_022750959.1ankyrin repeat-containing protein NPR4-like isoform X2
XLOC_024621	PKU79361.1integrator complex subunit 11
XLOC_024623	AEL30371.1TIR-NBS-LRR type disease resistance protein
XLOC_024628	OVA04698.1START domain
XLOC_024639	RVX00846.1hypothetical protein CK203_026407
XLOC_024648	PIN01347.1Glutaminyl-tRNA synthetase
XLOC_024692	---NA---
XLOC_024734	PSS26765.1Ion channel POLLUX like
XLOC_024746	AEL30371.1TIR-NBS-LRR type disease resistance protein
XLOC_024774	OMP13994.1tubulin-tyrosine ligase family protein
XLOC_024783	XP_023899076.1zinc finger CCCH domain-containing protein 13-like
XLOC_024796	XP_002283504.2 growth-regulating factor 1
XLOC_024810	RVW53000.1Suppressor of mec-8 and unc-52 protein-like 1
XLOC_024811	PSR91143.1Endoribonuclease
XLOC_024818	---NA---
XLOC_024829	---NA---
XLOC_024840	RVW34428.1putative ribonuclease H protein
XLOC_024958	XP_021605632.17-deoxyloganetin glucosyltransferase-like
XLOC_024969	RVW93419.1Transposon Tf2-12 polyprotein
XLOC_024993	PSR99675.1DNA-3-methyladenine glycosylase
XLOC_025028	PSS33297.1Shutoff protein
XLOC_025077	XP_019441998.1 sucrose transport protein SUC8-like isoform X1
XLOC_025084	PSS13447.1Peptide chain release factor 1 like
XLOC_025086	GAU44158.1hypothetical protein TSUD_399800
XLOC_025087	RVW94843.1Retrovirus-related Pol polyprotein from transposon TNT 1-94
XLOC_025089	RVW12373.1ARM repeat protein interacting with ABF2
XLOC_025095	---NA---
XLOC_025164	PSS02893.1DExH-box ATP-dependent RNA helicase
XLOC_025166	KHN06274.1Retrovirus-related Pol polyprotein from transposon TNT 1-94
XLOC_025171	XP_016719338.1 photosystem II CP47 reaction center protein-like
XLOC_025175	RVW65037.1Transcription factor HBP-1b(c1)
XLOC_025201	AAQ64541.1NADH dehydrogenase subunit B (chloroplast)
XLOC_025212	XP_023880760.1protein PHLOEM PROTEIN 2-LIKE A9-like
XLOC_025265	XP_015882483.1quinolinate synthase, chloroplastic
XLOC_025274	---NA---
XLOC_025463	YP_008999587.1transport membrane protein (mitochondrion)
XLOC_025486	---NA---
XLOC_025487	---NA---
XLOC_025489	---NA---
XLOC_025523	RWR97900.1photosystem II CP47 reaction center-like protein
XLOC_025529	XP_024160137.1protein yippee-like At5g53940 isoform X1
XLOC_025534	---NA---
XLOC_025553	QAV58400.1hypothetical chloroplast RF1 (chloroplast)
XLOC_025572	EEF38517.1catalytic, putative
XLOC_025595	XP_017984721.1 putative disease resistance RPP13-like protein 1
XLOC_025609	RVW96784.1hypothetical protein CK203_026117
XLOC_025619	RVW84538.1Retrovirus-related Pol polyprotein from transposon TNT 1-94
XLOC_025633	RVW98618.1Retrovirus-related Pol polyprotein from transposon RE1
XLOC_025636	ONM32720.1Retrovirus-related Pol polyprotein LINE-1
XLOC_025727	XP_022730900.1copper transporter 1-like
XLOC_025735	PSS34928.1EIF-2-alpha kinase
XLOC_025737	---NA---
XLOC_025804	PSS35317.1Heat shock protein HSP 90-alpha like
XLOC_025816	---NA---
XLOC_025837	---NA---
XLOC_025846	XP_022739536.1tRNA-dihydrouridine(16/17) synthase [NAD(P)(+)]-like
XLOC_025862	PSS31456.1Protein DCL like
XLOC_025889	---NA---
XLOC_025891	KYP56875.1Retrovirus-related Pol polyprotein LINE-1
XLOC_025908	RVW63855.1Ferredoxin-3, chloroplastic
XLOC_025919	PSS33495.1Cytochrome P450 94A1 like
XLOC_025923	---NA---
XLOC_025942	AEI83422.1chlorophyll synthase
XLOC_025961	---NA---
XLOC_025965	---NA---
XLOC_026030	XP_019247853.1 CASP-like protein 4A3
XLOC_026038	KYP58728.1Retrovirus-related Pol polyprotein from transposon TNT 1-94
XLOC_026057	---NA---
XLOC_026134	GBC10048.1hypothetical protein RclHR1_00930026
XLOC_026157	ACJ54183.1PB1 domain-containing protein
XLOC_026215	YP_009342744.1ribosomal protein S16 (chloroplast)
XLOC_026222	---NA---
XLOC_026235	QAV58389.1NADH-plastoquinone oxidoreductase subunit 5 (chloroplast)
XLOC_026279	XP_022846608.1defensin-like protein P322
XLOC_026307	XP_010257045.1 cytosolic endo-beta-N-acetylglucosaminidase 1-like
XLOC_026313	---NA---
XLOC_026337	XP_021619172.1protein ALUMINUM SENSITIVE 3
XLOC_026377	RVX14147.1Retrovirus-related Pol polyprotein from transposon TNT 1-94
XLOC_026440	XP_010256190.1 protein NRT1/ PTR FAMILY 2.9-like
XLOC_026478	RVW39613.1Copia protein
XLOC_026493	RVW23870.1putative ribonuclease H protein
XLOC_026524	---NA---
XLOC_026529	KRG94371.1hypothetical protein GLYMA_19G079800, partial
XLOC_026545	---NA---
XLOC_026561	ABN09452.1maturase K (plastid)
XLOC_026574	RWR98151.1NADPH-quinone oxidoreductase subunit 2
XLOC_026586	XP_003634371.1 bifunctional nuclease 2
XLOC_026600	KHN13665.1Retrovirus-related Pol polyprotein from transposon TNT 1-94
XLOC_026617	XP_006344234.1 chaperone protein DnaJ-like
XLOC_026638	GAV81240.1zf-RVT domain-containing protein
XLOC_026661	---NA---
XLOC_026719	---NA---
XLOC_026723	PSS13660.1Acid phosphatase/vanadium-dependent haloperoxidase-related protein
XLOC_026778	XP_010242380.1 plant cysteine oxidase 2 isoform X2
XLOC_026818	---NA---
XLOC_026857	---NA---
XLOC_026888	---NA---
XLOC_026944	KYP56875.1Retrovirus-related Pol polyprotein LINE-1
XLOC_026950	ATI24793.1ribosomal protein L2 (plastid)
XLOC_026964	ATI24797.1NADH-plastoquinone oxidoreductase subunit 2 (plastid)
XLOC_026994	PSR98034.1Zinc finger A20 and AN1 domain-containing stress-associated protein
XLOC_026999	CBL94163.1putative RNA-directed DNA polymerase (Reverse transcriptase)
XLOC_027017	RVW87179.1Cellulose synthase-like protein E1
XLOC_027024	OTG37238.1putative RNA-directed DNA polymerase, eukaryota, Reverse transcriptase zinc-binding domain protein
XLOC_027059	EOY29818.1Phosphofructokinase 3 isoform 1
XLOC_027107	OMO64185.1O-methyltransferase, family 2
XLOC_027133	---NA---
XLOC_027269	AYP70936.1endoglucanase 8
XLOC_027272	---NA---
XLOC_027277	PSS06103.1BPI/LBP family protein
XLOC_027292	OTF84779.1putative ribosomal protein L22/L17 (plastid)
XLOC_027296	XP_002509785.1glutathione S-transferase T1
XLOC_027298	OVA06663.1AMP-dependent synthetase/ligase
XLOC_027320	XP_016436734.1 endo-1,3;1,4-beta-D-glucanase-like
XLOC_027377	PSR90208.1Chromatin structure-remodeling complex protein like
XLOC_027379	XP_027097338.1piezo-type mechanosensitive ion channel homolog isoform X1
XLOC_027402	OVA10864.1Pentatricopeptide repeat
XLOC_027405	RVW78414.1Retrovirus-related Pol polyprotein from transposon RE1
XLOC_027408	---NA---
XLOC_027409	---NA---
XLOC_027421	RWR94899.1ataxia telangiectasia mutated family protein
XLOC_027426	PSR99686.1CRAL-TRIO domain-containing protein
XLOC_027461	XP_008813356.1probable disease resistance protein At5g45440
XLOC_027469	---NA---
XLOC_027474	---NA---
XLOC_027476	---NA---
XLOC_027479	RVW16046.1Retrovirus-related Pol polyprotein from transposon TNT 1-94
XLOC_027481	PSR98498.11,4-alpha-glucan-branching enzyme 1/amyloplastic like
XLOC_027482	XP_009125373.1PREDICTED: uncharacterized protein LOC103850383
XLOC_027485	EOY08149.1Starch branching enzyme 2.1 isoform 1
XLOC_027487	GAV92708.1zf-RVT domain-containing protein
XLOC_027518	XP_019199124.1 eukaryotic peptide chain release factor GTP-binding subunit-like
XLOC_027541	YP_009342820.1hypothetical chloroplast RF1 (chloroplast)
XLOC_027542	YP_009342820.1hypothetical chloroplast RF1 (chloroplast)
XLOC_027559	---NA---
XLOC_027563	YP_009342820.1hypothetical chloroplast RF1 (chloroplast)
XLOC_027564	OTG15260.1putative ribosomal protein S15
XLOC_027569	PSR95043.1Nodulation-signaling pathway 2 protein
XLOC_027581	---NA---
XLOC_027585	RWR97900.1photosystem II CP47 reaction center-like protein
XLOC_027586	RWR97900.1photosystem II CP47 reaction center-like protein
XLOC_027593	---NA---
XLOC_027594	---NA---
XLOC_027595	---NA---
XLOC_027599	PKU74657.1integrator complex subunit 11
XLOC_027604	XP_027168752.1CBL-interacting serine/threonine-protein kinase 5-like
XLOC_027610	QAV58351.1acetyl-CoA carboxylase carboxyl transferase beta (chloroplast)
XLOC_027612	PSR95058.1Protein SMAX1-LIKE like
XLOC_027622	QAV58386.1Ycf2 (chloroplast)
XLOC_027629	EXC35359.1Retrovirus-related Pol polyprotein from transposon TNT 1-94
XLOC_027632	QAV58400.1hypothetical chloroplast RF1 (chloroplast)
XLOC_027669	---NA---
XLOC_027675	PQQ07542.1putative leucine-rich repeat receptor-like protein kinase
XLOC_027719	PSR92621.1Vesicle-associated membrane protein
XLOC_027726	KYP58728.1Retrovirus-related Pol polyprotein from transposon TNT 1-94
XLOC_027772	RVW65502.1Transposon TX1 uncharacterized 149 kDa protein
XLOC_027836	---NA---
XLOC_027845	---NA---
XLOC_027887	PSS36449.1Dammarenediol 12-hydroxylase
XLOC_027924	XP_021826138.1protein SUPPRESSOR OF npr1-1, CONSTITUTIVE 1-like
XLOC_027966	KYP56875.1Retrovirus-related Pol polyprotein LINE-1
XLOC_028003	---NA---
XLOC_028045	---NA---
XLOC_028079	RVW64757.1Transposon Ty3-I Gag-Pol polyprotein
XLOC_028092	PSS30286.1Autophagy-related protein like
XLOC_028093	PKU62236.1putative mitochondrial protein
XLOC_028116	RVW86452.1Retrovirus-related Pol polyprotein from transposon TNT 1-94
XLOC_028133	---NA---
XLOC_028138	RVW46689.1putative ribonuclease H protein
XLOC_028153	PSS24720.1Transcription factor
XLOC_028191	PKU79361.1integrator complex subunit 11
XLOC_028197	RVW50129.1Retrovirus-related Pol polyprotein from transposon RE1
XLOC_028214	---NA---
XLOC_028215	---NA---
XLOC_028216	KYP34423.1Retrovirus-related Pol polyprotein LINE-1
XLOC_028217	ONM17895.1Double Clp-N motif-containing P-loop nucleoside triphosphate hydrolase superfamily protein
XLOC_028226	OMO64185.1O-methyltransferase, family 2
XLOC_028232	OMO97829.16-phosphogluconolactonase, DevB-type
XLOC_028326	AEL30371.1TIR-NBS-LRR type disease resistance protein
XLOC_028351	PSS01049.1Pentatricopeptide repeat-containing protein
XLOC_028368	RVW97585.1Retrovirus-related Pol polyprotein from transposon TNT 1-94
XLOC_028412	PNX74094.1copia LTR rider
XLOC_028423	PSS32715.1Abscisic acid receptor like
XLOC_028437	RVX21344.1Retrovirus-related Pol polyprotein from transposon RE2
XLOC_028460	RWR94899.1ataxia telangiectasia mutated family protein
XLOC_028461	XP_008803890.1chromatin structure-remodeling complex protein SYD-like isoform X1
XLOC_028464	KHN06274.1Retrovirus-related Pol polyprotein from transposon TNT 1-94
XLOC_028466	RVW75295.1Retrovirus-related Pol polyprotein from transposon TNT 1-94
XLOC_028468	RVX10871.1Retrovirus-related Pol polyprotein from transposon RE2
XLOC_028471	AFN88207.1integrase core domain containing protein
XLOC_028474	PKA50536.1ataxia telangiectasia mutated family protein
XLOC_028515	OTF96511.1 putative reverse transcriptase domain, Reverse transcriptase zinc-binding domain protein
XLOC_028520	---NA---
XLOC_028558	---NA---
XLOC_028604	KYP41064.1Retrovirus-related Pol polyprotein from transposon TNT 1-94
XLOC_028631	---NA---
XLOC_028644	ABB89014.1CXE carboxylesterase
XLOC_028691	---NA---
XLOC_028717	OMO64389.1hypothetical protein CCACVL1_21795
XLOC_028732	RVW39723.1LINE-1 reverse transcriptase-like
XLOC_028739	XP_010249574.1 probable protein phosphatase 2C 8
XLOC_028741	PSR96218.1Complex I intermediate-associated protein
XLOC_028745	RVW77037.1Brefeldin A-inhibited guanine nucleotide-exchange protein 5
XLOC_028746	RVW42450.1Transposon TX1 uncharacterized 149 kDa protein
XLOC_028757	AED99879.1cytochrome P450
XLOC_028797	PSR84662.1F-box protein
XLOC_028802	RVW56421.1Retrovirus-related Pol polyprotein from transposon TNT 1-94
XLOC_028819	---NA---
XLOC_028822	---NA---
XLOC_028854	RVW41005.1Retrovirus-related Pol polyprotein from transposon TNT 1-94
XLOC_028881	XP_022872562.1protein CELLULOSE SYNTHASE INTERACTIVE 3-like
XLOC_028903	RVX03908.1putative ribonuclease H protein
XLOC_028911	---NA---
XLOC_028935	XP_021593844.1protein SRG1-like
XLOC_028936	PSR85140.1Reticulon-like protein
XLOC_028947	GAV78761.1Cyt-b5 domain-containing protein
XLOC_028962	---NA---
XLOC_028982	OMO97311.1hypothetical protein COLO4_14695
XLOC_028983	XP_017237575.1 protein DA1-related 2 isoform X1
XLOC_029011	XP_020235874.1cation-chloride cotransporter 1 isoform X2
XLOC_029013	---NA---
XLOC_029023	---NA---
XLOC_029031	PKU82406.1Putative ribonuclease H protein
XLOC_029035	RHN49223.1putative reverse transcriptase domain-containing protein
XLOC_029036	PRQ20008.1putative ribonuclease H-like domain-containing protein
XLOC_029044	PSS31815.17-deoxyloganetin glucosyltransferase
XLOC_029063	---NA---
XLOC_029087	AQK72949.1Retrovirus-related Pol polyprotein LINE-1
XLOC_029090	---NA---
XLOC_029105	RVW99650.1putative ribonuclease H protein
XLOC_029106	AQK84025.1Retrovirus-related Pol polyprotein LINE-1
XLOC_029133	PSR91260.1Aquaporin TIP4-1 like
XLOC_029154	PSR96829.1Cyclic nucleotide-gated ion channel 8
XLOC_029156	PSR97981.1GTPase
XLOC_029176	PSS26076.1Cytochrome P450 82C2 like
XLOC_029191	PRQ53440.1putative RNA-directed DNA polymerase
XLOC_029193	---NA---
XLOC_029195	PKA61678.1putative mitochondrial protein
XLOC_029216	PKU67611.1ataxia telangiectasia mutated family protein
XLOC_029264	KYP56875.1Retrovirus-related Pol polyprotein LINE-1
XLOC_029266	RVW33358.1Transposon Ty3-G Gag-Pol polyprotein
XLOC_029277	PSR93118.1Mesoderm induction early response protein
XLOC_029285	XP_027166324.1zinc finger MYM-type protein 1-like
XLOC_029309	EOY01217.1LRR and NB-ARC domains-containing disease resistance protein, putative
XLOC_029317	AQK78972.1Retrovirus-related Pol polyprotein LINE-1
XLOC_029354	OVA07970.1tRNA transferase Trm5/Tyw2
XLOC_029362	PRQ17191.1putative RNA-directed DNA polymerase
XLOC_029363	KYP78386.1Retrovirus-related Pol polyprotein from transposon TNT 1-94
XLOC_029371	XP_022897411.1rac-like GTP-binding protein ARAC7
XLOC_029400	---NA---
XLOC_029436	---NA---
XLOC_029537	PSS09474.1Josephin-like protein
XLOC_029558	---NA---
XLOC_029567	KYP56875.1Retrovirus-related Pol polyprotein LINE-1
XLOC_029635	OMO82495.1Cytochrome P450
XLOC_029647	ADD30903.1putative RF1 protein (chloroplast)
XLOC_029665	PSS00490.1Zinc finger CCCH domain-containing protein
XLOC_029666	---NA---
XLOC_029756	PSR99656.1Protein translocase subunit SecA like
XLOC_029768	---NA---
XLOC_029778	PKA63925.1Retrovirus-related Pol polyprotein from transposon TNT 1-94
XLOC_029779	RVW55942.1Retrovirus-related Pol polyprotein from transposon RE1
XLOC_029785	PSS13996.1Cytochrome P450 704C1 like
XLOC_029796	PSR89843.1hypothetical protein CEY00_Acc30036
XLOC_029804	XP_010655735.1 serine/threonine-protein phosphatase 6 regulatory subunit 2 isoform X1
XLOC_029810	RVX23459.1Retrovirus-related Pol polyprotein from transposon TNT 1-94
XLOC_029811	PRQ42827.1putative nucleotidyltransferase, Ribonuclease H
XLOC_029812	RVW32682.1Transposon TX1 uncharacterized 149 kDa protein
XLOC_029813	RVW84538.1Retrovirus-related Pol polyprotein from transposon TNT 1-94
XLOC_029846	PSR95152.1Neurofilament light polypeptide like
XLOC_029863	PSS24323.1Thioredoxin-like fold protein
XLOC_029876	RVX22358.1GTP-binding protein OBGC, chloroplastic
XLOC_029883	RVW36762.1Retrovirus-related Pol polyprotein from transposon RE1
XLOC_029890	---NA---
XLOC_029915	PSS14049.1Protein PHOSPHATE STARVATION RESPONSE like
XLOC_029932	PSS32250.1Glioma tumor suppressor candidate region protein
XLOC_029933	PSS21245.1Membrane-associated kinase regulator
XLOC_029942	---NA---
XLOC_030009	XP_019078846.1PREDICTED: uncharacterized protein LOC100252779
XLOC_030101	---NA---
XLOC_030150	CAC95126.1gag-pol polyprotein
XLOC_030178	AAK92545.1Putative retroelement
XLOC_030196	RVW45888.1Phospholipase A I
XLOC_030204	PSS17329.1CBL-interacting serine/threonine-protein kinase
XLOC_030207	XP_021284667.1transcription factor bHLH93-like
XLOC_030261	PSS04861.1BES1/BZR1 protein
XLOC_030274	---NA---
XLOC_030276	---NA---
XLOC_030283	---NA---
XLOC_030295	PSR86707.1Protein like
XLOC_030302	---NA---
XLOC_030359	PSS35791.1Renalase
XLOC_030413	KYP34423.1Retrovirus-related Pol polyprotein LINE-1
XLOC_030428	XP_027180938.136.4 kDa proline-rich protein-like
XLOC_030454	XP_027116618.1mitochondrial substrate carrier family protein ucpB-like isoform X3
XLOC_030465	RVW35277.1Retrovirus-related Pol polyprotein from transposon TNT 1-94
XLOC_030478	PSR85143.1Ribose-5-phosphate isomerase
XLOC_030498	PKU64612.1integrator complex subunit 11
XLOC_030510	KYP74314.1Retrovirus-related Pol polyprotein from transposon TNT 1-94
XLOC_030553	PSS15656.1E3 ubiquitin-protein ligase MID2
XLOC_030611	XP_023929760.1uncharacterized protein LOC112041089
XLOC_030645	PSS33327.1LRR receptor-like serine/threonine-protein kinase precursor
XLOC_030701	XP_021276637.1phosphoglycerate mutase-like protein 1 isoform X1
XLOC_030759	---NA---
XLOC_030773	RVW30706.1putative ribonuclease H protein
XLOC_030853	PKU64612.1integrator complex subunit 11
XLOC_030854	---NA---
XLOC_030876	---NA---
XLOC_030897	---NA---
XLOC_030906	XP_017615187.1 uncharacterized mitochondrial protein AtMg00810-like
XLOC_030927	---NA---
XLOC_030940	PSS24556.1Non-specific phospholipase
XLOC_031002	AES97459.1RNA recognition motif
XLOC_031032	XP_019710167.1 eukaryotic translation initiation factor 3 subunit I isoform X2
XLOC_031069	XP_010684019.1PREDICTED: uncharacterized protein LOC104898622
XLOC_031085	XP_027096114.1zinc finger BED domain-containing protein RICESLEEPER 2-like
XLOC_031151	XP_023877718.1xyloglucan endotransglucosylase/hydrolase 2-like
XLOC_031154	XP_002283883.1 protodermal factor 1
XLOC_031169	PSR93352.1Pectinesterase inhibitor domain protein
XLOC_031205	PSR96528.1Serine/threonine-protein kinase
XLOC_031213	---NA---
XLOC_031274	PSS24639.1Ubiquitin-conjugating enzyme E2 24
XLOC_031278	RVW12382.1Transposon Ty3-I Gag-Pol polyprotein
XLOC_031309	---NA---
XLOC_031390	PSR92961.1Beta-D-glucosyl crocetin beta-1,6-glucosyltransferase
XLOC_031395	---NA---
XLOC_031396	RVX16116.1Retrovirus-related Pol polyprotein from transposon RE1
XLOC_031437	PSS30044.1Transmembrane protein like
XLOC_031470	---NA---
XLOC_031481	---NA---
XLOC_031489	RVW16659.1hypothetical protein CK203_080894
XLOC_031542	XP_018831634.1PREDICTED: uncharacterized protein LOC108999235
XLOC_031544	---NA---
XLOC_031593	---NA---
XLOC_031623	---NA---
XLOC_031686	---NA---
XLOC_031698	PSS07378.1PiRNA biogenesis protein
XLOC_031722	PSR95664.1B3 domain-containing protein
XLOC_031726	XP_022768069.1UDP-sugar pyrophosphorylase-like isoform X5
XLOC_031727	---NA---
XLOC_031732	RVW87285.1putative ribonuclease H protein
XLOC_031745	XP_023899076.1zinc finger CCCH domain-containing protein 13-like
XLOC_031747	XP_021617629.1ubiquitin carboxyl-terminal hydrolase 12-like isoform X6
XLOC_031778	PSS35700.1F-box/kelch-repeat protein
XLOC_031820	---NA---
XLOC_031849	---NA---
XLOC_031856	OMP00330.1reverse transcriptase
XLOC_031857	---NA---
XLOC_031860	OMO98613.1reverse transcriptase
XLOC_031861	PON88277.1Aminotransferase-like mobile domain containing protein
XLOC_031895	XP_023916991.1uncharacterized protein LOC112028525
XLOC_031984	CBL94163.1putative RNA-directed DNA polymerase (Reverse transcriptase)
XLOC_031996	GAV67141.1ADH_zinc_N domain-containing protein
XLOC_031997	XP_023895459.12-alkenal reductase (NADP(+)-dependent)-like
XLOC_032010	PSS06369.1CST complex subunit like
XLOC_032042	XP_011078126.1protein MARD1
XLOC_032053	PSR91858.1MADS-box protein like
XLOC_032190	GAV87838.1RVT_2 domain-containing protein
XLOC_032191	RVW54646.1Retrovirus-related Pol polyprotein from transposon TNT 1-94
XLOC_032192	RVW53095.1Retrovirus-related Pol polyprotein from transposon TNT 1-94
XLOC_032195	RVX23459.1Retrovirus-related Pol polyprotein from transposon TNT 1-94
XLOC_032267	XP_015163352.1PREDICTED: uncharacterized protein LOC107060243
XLOC_032287	ONI02115.1hypothetical protein PRUPE_6G177500
XLOC_032290	XP_010644270.1 transcription initiation factor TFIID subunit 11 isoform X1
XLOC_032309	OMO64702.1hypothetical protein COLO4_31887
XLOC_032313	XP_023916938.1protein NYNRIN-like
XLOC_032328	EOY00436.1H0502G05.11 protein
XLOC_032330	---NA---
XLOC_032333	AAL75999.1putative polyprotein
XLOC_032334	RVX02750.1LINE-1 retrotransposable element ORF2 protein
XLOC_032427	RVX10346.1Retrovirus-related Pol polyprotein from transposon RE1
XLOC_032457	XP_015871729.1ribonuclease 3-like protein 1
XLOC_032487	XP_027084003.1glutathione S-transferase 3-like
XLOC_032580	RVW84538.1Retrovirus-related Pol polyprotein from transposon TNT 1-94
XLOC_032581	RVX21645.1Retrovirus-related Pol polyprotein from transposon RE1
XLOC_032582	RVW77862.1Retrovirus-related Pol polyprotein from transposon TNT 1-94
XLOC_032587	---NA---
XLOC_032602	PSS34929.1Serine/threonine-protein kinase-like protein
XLOC_032606	XP_002272712.1 protein AAR2 homolog isoform X2
XLOC_032632	AEL30371.1TIR-NBS-LRR type disease resistance protein
XLOC_032674	XP_002269322.1PREDICTED: uncharacterized protein At4g22758
XLOC_032684	PSR95930.1adenylate kinase
XLOC_032695	OMO63131.1Integrase, catalytic core
XLOC_032748	XP_021829081.1heavy metal-associated isoprenylated plant protein 23
XLOC_032751	XP_021829081.1heavy metal-associated isoprenylated plant protein 23
XLOC_032852	PSS10349.1Bifunctional pectinesterase 18/rRNA N-glycosylase
XLOC_032942	---NA---
XLOC_032954	---NA---
XLOC_032969	---NA---
XLOC_032972	PSS11952.15-hydroxyisourate hydrolase like isoform 1
XLOC_033012	XP_018506897.1 glycine-rich RNA-binding protein-like
XLOC_033047	PSS21348.1Odorant receptor 98a like
XLOC_033099	---NA---
XLOC_033100	PSS29000.1LRR receptor-like serine/threonine-protein kinase
XLOC_033124	PSS14464.13-phosphoshikimate 1-carboxyvinyltransferase
XLOC_033129	XP_023876131.1uncharacterized protein LOC111988571
XLOC_033138	XP_002281639.1 growth-regulating factor 10
XLOC_033149	RVW53829.1Transposon TX1 uncharacterized 149 kDa protein
XLOC_033187	XP_014496249.1S-adenosylmethionine synthase 4
XLOC_033263	---NA---
XLOC_033295	AZL19539.1transcription factor GRAS2
XLOC_033300	XP_017229533.1 peroxidase 17
XLOC_033318	RVX09076.1Transposon TX1 uncharacterized 149 kDa protein
XLOC_033348	XP_010050347.1 plant intracellular Ras-group-related LRR protein 4-like
XLOC_033368	PSR95350.1Protein trichome birefringence-like
XLOC_033379	PSS11502.1Pectinesterase inhibitor domain protein
XLOC_033439	PKU64612.1integrator complex subunit 11
XLOC_033443	PSR95124.1CLE46p like
XLOC_033452	RVW94843.1Retrovirus-related Pol polyprotein from transposon TNT 1-94
XLOC_033475	XP_010250452.1 probable protein S-acyltransferase 7
XLOC_033486	XP_016500822.1 ribosomal protein S4, mitochondrial
XLOC_033505	PSS30527.1Rapid alkalinization factor like
XLOC_033518	PSR88194.1Protein BREAKING OF ASYMMETRY IN THE STOMATAL LINEAGE like
XLOC_033617	PSR91803.1Molybdate transporter like
XLOC_033732	RVW93188.1Transposon TX1 uncharacterized 149 kDa protein
XLOC_033743	PSR97894.1Serine/threonine-protein kinase
XLOC_033757	RVW43354.1putative ribonuclease H protein
XLOC_033777	---NA---
XLOC_033824	XP_021274836.1transcription factor bHLH121 isoform X2
XLOC_033830	PSR92931.1Pentatricopeptide repeat-containing protein
XLOC_033845	RVW93026.1DNA-directed RNA polymerase I subunit 2
XLOC_033849	PSS36126.1Pyrophosphate-energized vacuolar membrane proton pump like
XLOC_033855	RVW13061.1Transposon TX1 uncharacterized 149 kDa protein
XLOC_033863	RWR88474.1putative E3 ubiquitin-protein ligase RHC2A
XLOC_033911	PSS15811.1FH protein interacting protein
XLOC_033913	---NA---
XLOC_033924	XP_018810895.1PREDICTED: uncharacterized protein LOC108983648
XLOC_033953	PIN12419.1Non-specific protein-tyrosine kinase
XLOC_033994	PSR86855.1ETHYLENE INSENSITIVE 3-like 3 protein
XLOC_034017	---NA---
XLOC_034028	---NA---
XLOC_034030	XP_022737378.1probable copper-transporting ATPase HMA5
XLOC_034031	XP_010089121.1probable copper-transporting ATPase HMA5
XLOC_034051	XP_023892835.1universal stress protein PHOS34
XLOC_034085	PSS31380.1Cytochrome P450 82A3 like
XLOC_034087	PSR99689.1Inactive protein kinase
XLOC_034089	OVA15437.1Cytochrome P450
XLOC_034090	PSS31380.1Cytochrome P450 82A3 like
XLOC_034097	EOY16011.1 E3 ubiquitin-protein ligase HUWE1, putative
XLOC_034110	---NA---
XLOC_034114	PSS14217.1Bifunctional lysine-specific demethylase and histidyl-hydroxylase
XLOC_034135	PSS09948.1Dentin sialoprotein
XLOC_034183	PSS14598.1Protein NETWORKED 1D like
XLOC_034292	---NA---
XLOC_034298	---NA---
XLOC_034310	PSS33005.1Zinc finger protein
XLOC_034325	AOY34417.1transcription factor BHLH046
XLOC_034394	---NA---
XLOC_034398	---NA---
XLOC_034414	EOY23266.1Hydroxyproline-rich glycoprotein family protein isoform 1
XLOC_034423	PSS17210.1Protein indeterminate-domain like
XLOC_034449	OIT34550.1putative ubiquitin-like-specific protease 2b
XLOC_034450	---NA---
XLOC_034465	PSR86537.1Serine carboxypeptidase-like
XLOC_034490	PHU17987.1Potassium channel GORK
XLOC_034504	KYP58728.1Retrovirus-related Pol polyprotein from transposon TNT 1-94
XLOC_034507	---NA---
XLOC_034508	RVW91675.1LINE-1 reverse transcriptase-like
XLOC_034509	---NA---
XLOC_034522	XP_021660830.1dof zinc finger protein DOF2.2-like
XLOC_034608	---NA---
XLOC_034617	PHT60200.1Clustered mitochondria protein
XLOC_034691	GAV73547.1NB-ARC domain-containing protein
XLOC_034745	XP_027113345.1NAC domain-containing protein 35-like
XLOC_034844	---NA---
XLOC_034868	---NA---
XLOC_034871	KYP56875.1Retrovirus-related Pol polyprotein LINE-1
XLOC_034904	RVW44349.1LINE-1 reverse transcriptase-like
XLOC_034948	KYP34423.1Retrovirus-related Pol polyprotein LINE-1
XLOC_034979	PSR90248.1E3 ubiquitin-protein ligase BRE1-like
XLOC_034983	PSS05651.1Riboflavin kinase
XLOC_035009	PSS16338.1Callose synthase
XLOC_035010	PIN22751.11,3-beta-glucan synthase/callose synthase catalytic subunit
XLOC_035012	---NA---
XLOC_035013	RVW21614.1Retrovirus-related Pol polyprotein from transposon TNT 1-94
XLOC_035036	PSS06020.1Poly(A)-specific ribonuclease
XLOC_035066	RVW55533.1Retrovirus-related Pol polyprotein from transposon RE2
XLOC_035101	---NA---
XLOC_035104	RVW72723.1putative ribonuclease H protein
XLOC_035136	XP_002270439.2 pentatricopeptide repeat-containing protein At1g04840
XLOC_035143	---NA---
XLOC_035150	---NA---
XLOC_035151	PHT60200.1Clustered mitochondria protein
XLOC_035185	---NA---
XLOC_035230	AOY34426.1transcription factor BHLH055
XLOC_035272	OMO74715.1Late embryogenesis abundant protein, LEA-14
XLOC_035279	XP_027084399.1G-type lectin S-receptor-like serine/threonine-protein kinase CES101
XLOC_035364	XP_006360782.1 protein OBERON 2-like isoform X1
XLOC_035369	RVW93419.1Transposon Tf2-12 polyprotein
XLOC_035370	EOY01158.1DNA/RNA polymerases superfamily protein
XLOC_035420	---NA---
XLOC_035435	PSR92946.1Protein SMAX1-LIKE like
XLOC_035522	XP_021685202.1probable aquaporin PIP2-8
XLOC_035531	PSS04971.1Pleiotropic drug resistance protein
XLOC_035587	---NA---
XLOC_035592	ONM06296.1Retrovirus-related Pol polyprotein LINE-1
XLOC_035663	---NA---
XLOC_035732	RVW35277.1Retrovirus-related Pol polyprotein from transposon TNT 1-94
XLOC_035770	XP_017232593.1 glyoxylate/hydroxypyruvate reductase HPR3-like
XLOC_035771	PSS31545.1Rhamnogalacturonate lyase
XLOC_035796	RVW12358.1Transposon Ty3-I Gag-Pol polyprotein
XLOC_035826	PSS35932.1Homeobox-leucine zipper protein
XLOC_035834	RVW96791.1Transposon TX1 uncharacterized 149 kDa protein
XLOC_035837	XP_015879647.1ribosomal lysine N-methyltransferase 3-like isoform X1
XLOC_035863	RVX17860.1Transposon TX1 uncharacterized 149 kDa protein
XLOC_035869	---NA---
XLOC_035883	XP_021598600.1ras-related protein RABB1b
XLOC_035891	---NA---
XLOC_035894	---NA---
XLOC_035899	XP_017255857.1 transposon Ty3-I Gag-Pol polyprotein isoform X1
XLOC_035902	RVW52101.1Transposon TX1 uncharacterized 149 kDa protein
XLOC_035906	XP_024639922.1zinc finger BED domain-containing protein RICESLEEPER 2
XLOC_035958	---NA---
XLOC_035974	XP_022019187.1probable beta-D-xylosidase 7
XLOC_035976	---NA---
XLOC_035977	---NA---
XLOC_035982	XP_002279230.2 homeobox protein BEL1 homolog
XLOC_035984	XP_021895092.1probable boron transporter 2 isoform X1
XLOC_035985	PSR95873.1Boron transporter like
XLOC_036024	XP_017974110.1 TMV resistance protein N
XLOC_036029	PSR89157.1Actin cytoskeleton-regulatory complex protein
XLOC_036046	PSS31576.1BEACH domain-containing protein
XLOC_036058	GAV93098.1DUF4283 domain-containing protein/zf-CCHC_4 domain-containing protein
XLOC_036059	RVX06204.1Retrovirus-related Pol polyprotein from transposon TNT 1-94
XLOC_036060	RVW74515.1Retrovirus-related Pol polyprotein from transposon RE2
XLOC_036061	RVW48950.1Transposon Ty3-I Gag-Pol polyprotein
XLOC_036062	---NA---
XLOC_036077	---NA---
XLOC_036099	KHG28118.1ARF2-B: ADP-ribosylation factor 2-B
XLOC_036103	PKA66013.1ataxia telangiectasia mutated family protein
XLOC_036116	PSS12150.1Monosaccharide-sensing protein
XLOC_036133	AAL75999.1putative polyprotein
XLOC_036193	---NA---
XLOC_036201	---NA---
XLOC_036204	RVW25417.1Retrovirus-related Pol polyprotein from transposon TNT 1-94
XLOC_036230	RVW28424.1Retrovirus-related Pol polyprotein from transposon RE1
XLOC_036231	XP_022768069.1UDP-sugar pyrophosphorylase-like isoform X5
XLOC_036262	AAX92941.1retrotransposon protein, putative, Ty1-copia sub-class
XLOC_036265	XP_021686393.11-aminocyclopropane-1-carboxylate oxidase homolog 1-like isoform X1
XLOC_036282	---NA---
XLOC_036285	---NA---
XLOC_036288	XP_022873792.11-aminocyclopropane-1-carboxylate oxidase homolog
XLOC_036300	XP_027078582.1uncharacterized protein LOC113701895 isoform X1
XLOC_036303	RVW49549.1Transposon TX1 uncharacterized 149 kDa protein
XLOC_036317	PSS09902.1putative zinc- or iron-chelating domain containing protein
XLOC_036361	AAT40504.2Polyprotein, putative
XLOC_036367	XP_010652717.1 probable N-acetyltransferase HLS1
XLOC_036418	---NA---
XLOC_036433	PSR97956.1Electron transfer flavoprotein subunit beta like
XLOC_036501	XP_021663578.1receptor homology region, transmembrane domain- and RING domain-containing protein 2-like
XLOC_036564	AEL30371.1TIR-NBS-LRR type disease resistance protein
XLOC_036573	XP_011046767.1 proline-rich protein 4
XLOC_036577	PSS12037.1Auxin-responsive protein
XLOC_036588	OIT32621.1protein nrt1 ptr family 5.2
XLOC_036632	RVW59101.1Pol polyprotein
XLOC_036697	RVW33465.1Retrovirus-related Pol polyprotein from transposon RE2
XLOC_036699	PKU81295.1ataxia telangiectasia mutated family protein
XLOC_036736	XP_006434705.1F-box protein At1g47056
XLOC_036745	PHT52732.1Brefeldin A-inhibited guanine nucleotide-exchange protein 5
XLOC_036787	PKU80435.1integrator complex subunit 11
XLOC_036788	RVW37133.1Eukaryotic translation initiation factor 5B
XLOC_036791	PWA63920.1reverse transcriptase domain-containing protein
XLOC_036796	KYP54935.1Retrovirus-related Pol polyprotein from transposon TNT 1-94
XLOC_036804	---NA---
XLOC_036808	OVA10864.1Pentatricopeptide repeat
XLOC_036809	RVW17729.1Retrovirus-related Pol polyprotein from transposon TNT 1-94
XLOC_036810	---NA---
XLOC_036821	RHN48942.1putative RNA-directed DNA polymerase
XLOC_036828	---NA---
XLOC_036839	PSR98171.1Serine/threonine-protein kinase
XLOC_036847	XP_009769835.1 serine/threonine-protein kinase-like protein CCR1 isoform X1
XLOC_036858	KYP34487.1Retrovirus-related Pol polyprotein from transposon TNT 1-94
XLOC_036887	XP_019187873.1 probable calcium-binding protein CML36
XLOC_036936	PSS11253.1Growth-regulating factor like
XLOC_037026	RVW69546.1Retrovirus-related Pol polyprotein from transposon TNT 1-94
XLOC_037034	PSS24853.1Eukaryotic translation initiation factor 4G like
XLOC_037039	---NA---
XLOC_037064	XP_006356461.1 1-Cys peroxiredoxin
XLOC_037103	XP_002266720.1 nicotinamidase 1
XLOC_037137	---NA---
XLOC_037213	PSS13660.1Acid phosphatase/vanadium-dependent haloperoxidase-related protein
XLOC_037231	PSS01176.1hypothetical protein CEY00_Acc22534, partial
XLOC_037243	EOY23098.1Retrotransposon, unclassified-like protein
XLOC_037244	---NA---
XLOC_037245	---NA---
XLOC_037262	PKA47709.1ataxia telangiectasia mutated family protein
XLOC_037269	---NA---
XLOC_037270	PSS31347.1Glucose-6-phosphate isomerase
XLOC_037275	---NA---
XLOC_037297	KYP56875.1Retrovirus-related Pol polyprotein LINE-1
XLOC_037376	XP_018628968.1 CENP-B homolog protein 2-like
XLOC_037386	XP_022862169.1protein NUCLEAR FUSION DEFECTIVE 4
XLOC_037397	ADR71244.160S ribosomal protein L27A
XLOC_037447	PSR92471.1Inactive DNA (cytosine-5)-methyltransferase DRM3
XLOC_037471	ARU79073.1beta-glucosidase 5 GH1 family
XLOC_037504	---NA---
XLOC_037513	---NA---
XLOC_037643	---NA---
XLOC_037657	---NA---
XLOC_037660	CAC95126.1gag-pol polyprotein
XLOC_037692	---NA---
XLOC_037716	PSS15730.1Vacuolar amino acid transporter like
XLOC_037717	---NA---
XLOC_037721	XP_015898602.1F-box protein PP2-A15
XLOC_037732	PSS35633.1Serine/threonine-protein kinase
XLOC_037772	XP_015891434.1heat stress transcription factor A-7a-like
XLOC_037849	---NA---
XLOC_037865	XP_015890632.1calmodulin-binding transcription activator 3 isoform X1
XLOC_037919	PSS05761.1GTPase-activating protein
XLOC_037940	---NA---
XLOC_037974	XP_015902364.1GATA transcription factor 9-like
XLOC_037991	---NA---
XLOC_038000	PSR99743.1Hepatoma-derived growth factor-related protein like
XLOC_038034	AFU25705.1gag-pol precursor
XLOC_038047	XP_023756491.1protein NRT1/ PTR FAMILY 2.7-like
XLOC_038052	XP_012073217.1MAPK kinase substrate protein At1g80180
XLOC_038155	PSS24406.1Protein CLEC16A like
XLOC_038163	RVW71744.1Retrovirus-related Pol polyprotein from transposon TNT 1-94
XLOC_038164	OVA10864.1Pentatricopeptide repeat
XLOC_038165	---NA---
XLOC_038172	---NA---
XLOC_038174	---NA---
XLOC_038193	RVW42450.1Transposon TX1 uncharacterized 149 kDa protein
XLOC_038214	OMO64185.1O-methyltransferase, family 2
XLOC_038219	KYP45441.1Retrovirus-related Pol polyprotein from transposon TNT 1-94
XLOC_038222	AFN88207.1integrase core domain containing protein
XLOC_038246	---NA---
XLOC_038250	---NA---
XLOC_038284	XP_027097338.1piezo-type mechanosensitive ion channel homolog isoform X1
XLOC_038291	RVW54646.1Retrovirus-related Pol polyprotein from transposon TNT 1-94
XLOC_038293	KYP47640.1Retrovirus-related Pol polyprotein from transposon TNT 1-94
XLOC_038294	CDN96898.1putative Ty-1 copia retrotransposon
XLOC_038297	EOX95569.1DNA/RNA polymerases superfamily protein
XLOC_038323	---NA---
XLOC_038324	XP_022867746.1uncharacterized protein LOC111387423
XLOC_038326	XP_018828436.1 UPF0481 protein At3g47200-like
XLOC_038328	RVX07636.1Transposon Ty3-I Gag-Pol polyprotein
XLOC_038330	---NA---
XLOC_038337	---NA---
XLOC_038339	RVX23975.1LINE-1 reverse transcriptase-like
XLOC_038340	PSR93322.1Ran-binding protein
XLOC_038357	XP_026657612.1uncharacterized protein LOC113461736
XLOC_038358	RVW33600.1putative MO25-like protein
XLOC_038366	---NA---
XLOC_038377	PSR98904.1Ubiquitin-conjugating enzyme like
XLOC_038385	---NA---
XLOC_038387	RVW63114.1Serine/threonine-protein phosphatase 7 long form-like
XLOC_038390	---NA---
XLOC_038391	---NA---
XLOC_038409	PRQ55093.1putative nucleotidyltransferase, Ribonuclease H
XLOC_038418	XP_022882791.1secoisolariciresinol dehydrogenase-like
XLOC_038445	XP_010916037.1 OPA3-like protein
XLOC_038448	ALL97704.1bZIP transcription factor 17
XLOC_038472	EOX95569.1DNA/RNA polymerases superfamily protein
XLOC_038480	PSR93498.1Phosphatidylinositol 4-phosphate 5-kinase
XLOC_038501	PSR96693.1E3 ubiquitin-protein like
XLOC_038538	RVX23459.1Retrovirus-related Pol polyprotein from transposon TNT 1-94
XLOC_038545	XP_009757992.1 MLO-like protein 1
XLOC_038555	OTG20094.1putative reverse transcriptase domain, Reverse transcriptase zinc-binding domain protein
XLOC_038566	PSS14739.1Nodal modulator 1 like
XLOC_038571	---NA---
XLOC_038572	OMO94091.1reverse transcriptase
XLOC_038573	XP_018810895.1PREDICTED: uncharacterized protein LOC108983648
XLOC_038574	KYP34423.1Retrovirus-related Pol polyprotein LINE-1
XLOC_038590	PKU59787.1Retrovirus-related Pol polyprotein from transposon TNT 1-94
XLOC_038591	KYP36562.1Retrovirus-related Pol polyprotein from transposon TNT 1-94
XLOC_038601	PSS04140.1Protein IQ-DOMAIN like
XLOC_038603	KHG00578.1DNA topoisomerase 4 subunit B
XLOC_038630	PSR87527.1Succinate dehydrogenase [ubiquinone] iron-sulfur subunit 2 like
XLOC_038640	RVX16072.1Catalase isozyme 1
XLOC_038645	XP_024451282.1protein NLP4
XLOC_038658	EOY01158.1DNA/RNA polymerases superfamily protein
XLOC_038659	RVW57760.1Retrovirus-related Pol polyprotein from transposon RE2
XLOC_038660	RVW35571.1LINE-1 reverse transcriptase-like
XLOC_038661	RVW74319.1Transposon TX1 uncharacterized 149 kDa protein
XLOC_038663	---NA---
XLOC_038668	PSS04271.1[Fructose-bisphosphate aldolase]-lysine N-methyltransferase
XLOC_038671	---NA---
XLOC_038674	CAC95126.1gag-pol polyprotein
XLOC_038686	PSS02584.1MADS-box transcription factor
XLOC_038695	PKA47469.1Retrovirus-related Pol polyprotein from transposon TNT 1-94
XLOC_038735	RVX23459.1Retrovirus-related Pol polyprotein from transposon TNT 1-94
XLOC_038737	RVW53252.1Transposon TX1 uncharacterized 149 kDa protein
XLOC_038738	KYP44825.1Retrovirus-related Pol polyprotein from transposon TNT 1-94
XLOC_038743	EOY08376.1DNA/RNA polymerases superfamily protein
XLOC_038763	RVW27249.1Transposon Ty3-G Gag-Pol polyprotein
XLOC_038764	---NA---
XLOC_038766	PSS07931.1DnaJ subfamily C member 10 like
XLOC_038770	RVX07474.1Retrovirus-related Pol polyprotein from transposon RE1
XLOC_038777	PRQ29559.1putative nucleotidyltransferase, Ribonuclease H
XLOC_038787	PSS24320.1Disease resistance RPP13-like protein
XLOC_038802	PSR91681.1GATA transcription factor
XLOC_038804	PSS09683.1Kelch repeat-containing protein
XLOC_038829	---NA---
XLOC_038838	XP_022768069.1UDP-sugar pyrophosphorylase-like isoform X5
XLOC_038841	---NA---
XLOC_038842	---NA---
XLOC_038852	KYP56875.1Retrovirus-related Pol polyprotein LINE-1
XLOC_038893	RVW19212.1LINE-1 reverse transcriptase-like
XLOC_038897	PSS05026.1Protein CHROMATIN REMODELING like
XLOC_038899	PSS11235.12-keto-3-deoxy-L-rhamnonate aldolase
XLOC_038920	---NA---
XLOC_038924	XP_010660906.1 myosin-9 isoform X1
XLOC_038944	RVX08030.11-aminocyclopropane-1-carboxylate oxidase
XLOC_038976	YP_009498116.1CcmFC (mitochondrion)
XLOC_038980	RVW32968.1Retrovirus-related Pol polyprotein from transposon TNT 1-94
XLOC_038984	AAT40504.2Polyprotein, putative
XLOC_038989	PKA47709.1ataxia telangiectasia mutated family protein
XLOC_039025	RVW52056.1Retrovirus-related Pol polyprotein from transposon TNT 1-94
XLOC_039026	XP_023881412.1uncharacterized protein LOC111993823
XLOC_039067	PSS09989.1Nuclear transcription factor Y subunit A-1 like
XLOC_039098	XP_024456548.1G-type lectin S-receptor-like serine/threonine-protein kinase B120
XLOC_039100	RVW88342.1Retrovirus-related Pol polyprotein from transposon TNT 1-94
XLOC_039146	GAV69859.1UBN2_3 domain-containing protein
XLOC_039160	XP_011084187.136.4 kDa proline-rich protein-like
XLOC_039163	XP_011084187.136.4 kDa proline-rich protein-like
XLOC_039166	CBL94163.1putative RNA-directed DNA polymerase (Reverse transcriptase)
XLOC_039168	---NA---
XLOC_039180	---NA---
XLOC_039181	AHL29280.1trehalose-phosphate synthase 6
XLOC_039199	RVW38802.1LINE-1 reverse transcriptase-like
XLOC_039238	XP_015932175.1cyanate hydratase isoform X1
XLOC_039275	PSS04519.1UNC93-like protein
XLOC_039286	PSS02718.1Pentatricopeptide repeat-containing protein
XLOC_039289	RLN04959.1Retrovirus-related Pol polyprotein LINE-1
XLOC_039290	XP_020233683.1craniofacial development protein 2-like
XLOC_039293	XP_010255596.1 MADS-box transcription factor 6
XLOC_039344	---NA---
XLOC_039345	---NA---
XLOC_039350	KYP56875.1Retrovirus-related Pol polyprotein LINE-1
XLOC_039376	RVW89271.1putative ribonuclease H protein
XLOC_039386	RVX18068.1Retrovirus-related Pol polyprotein from transposon RE1
XLOC_039388	RVW70491.1Lysine--tRNA ligase, cytoplasmic
XLOC_039399	XP_021623640.1putative disease resistance protein RGA3
XLOC_039498	RWR76766.1protein NYNRIN-like protein
XLOC_039555	XP_006381614.2guanine nucleotide-binding protein subunit gamma 3 isoform X1
XLOC_039573	---NA---
XLOC_039578	PSS15521.1Inactive protein kinase
XLOC_039579	---NA---
XLOC_039580	RWR94899.1ataxia telangiectasia mutated family protein
XLOC_039581	---NA---
XLOC_039584	---NA---
XLOC_039595	ONL94081.1Retrovirus-related Pol polyprotein LINE-1
XLOC_039604	RVW39635.1Retrovirus-related Pol polyprotein from transposon RE1
XLOC_039641	ACD03223.1xyloglucan endotransglucosylase/hydrolase 13
XLOC_039652	---NA---
XLOC_039708	PSS31722.1Transcription factor like
XLOC_039735	XP_002271823.2 protease Do-like 7 isoform X1
XLOC_039765	---NA---
XLOC_039793	RVW71911.1Retrovirus-related Pol polyprotein from transposon TNT 1-94
XLOC_039799	EOX95569.1DNA/RNA polymerases superfamily protein
XLOC_039811	PSR86481.1Rho GTPase-activating protein
XLOC_039914	PSR99931.1BZIP transcription factor
XLOC_039923	RVX20218.1Transposon TX1 uncharacterized 149 kDa protein
XLOC_039953	XP_021681597.1uncharacterized protein LOC110665692
XLOC_039991	XP_022882039.1multicopper oxidase LPR2-like
XLOC_040003	---NA---
XLOC_040007	---NA---
XLOC_040011	---NA---
XLOC_040018	---NA---
XLOC_040026	XP_011069335.115.7 kDa heat shock protein, peroxisomal
XLOC_040029	---NA---
XLOC_040033	XP_021593894.1uncharacterized protein LOC110601166
XLOC_040083	PSS10394.1GDP-fucose protein O-fucosyltransferase protein
XLOC_040084	---NA---
XLOC_040114	PSR84827.1Anthranilate phosphoribosyltransferase
XLOC_040122	---NA---
XLOC_040137	---NA---
XLOC_040150	XP_027097338.1piezo-type mechanosensitive ion channel homolog isoform X1
XLOC_040155	RVW96972.1Retrovirus-related Pol polyprotein from transposon RE2
XLOC_040156	RVW80368.1Retrovirus-related Pol polyprotein from transposon TNT 1-94
XLOC_040157	PKA47469.1Retrovirus-related Pol polyprotein from transposon TNT 1-94
XLOC_040158	RVW94843.1Retrovirus-related Pol polyprotein from transposon TNT 1-94
XLOC_040160	PSR87848.1Protein PIN-LIKES like
XLOC_040171	PSR94765.1Spastin like
XLOC_040173	KYP76032.1Retrovirus-related Pol polyprotein from transposon TNT 1-94
XLOC_040182	RVW96784.1hypothetical protein CK203_026117
XLOC_040184	KYP56875.1Retrovirus-related Pol polyprotein LINE-1
XLOC_040197	---NA---
XLOC_040202	---NA---
XLOC_040203	RVW43354.1putative ribonuclease H protein
XLOC_040226	XP_022722437.154S ribosomal protein L51, mitochondrial-like
XLOC_040247	XP_018831634.1PREDICTED: uncharacterized protein LOC108999235
XLOC_040253	EOY18623.1Uncharacterized protein TCM_043123
XLOC_040275	---NA---
XLOC_040298	RVW64704.1Retrovirus-related Pol polyprotein from transposon RE1
XLOC_040322	PSS06030.1Inactive beta-amylase
XLOC_040364	---NA---
XLOC_040372	GAV56876.1UBN2_3 domain-containing protein
XLOC_040389	---NA---
XLOC_040390	---NA---
XLOC_040424	PSR92681.1Mediator of RNA polymerase II transcription subunit 33A like
XLOC_040464	RVW53756.1Transposon TX1 uncharacterized 149 kDa protein
XLOC_040517	---NA---
XLOC_040550	RVW39635.1Retrovirus-related Pol polyprotein from transposon RE1
XLOC_040560	---NA---
XLOC_040621	---NA---
XLOC_040631	---NA---
XLOC_040634	RVW53975.1Retrovirus-related Pol polyprotein from transposon RE1
XLOC_040657	XP_015893859.1protein SRC2-like
XLOC_040769	---NA---
XLOC_040776	---NA---
XLOC_040789	PSS14598.1Protein NETWORKED 1D like
XLOC_040833	RVW86922.1Retrovirus-related Pol polyprotein from transposon TNT 1-94
XLOC_040834	PKA50536.1ataxia telangiectasia mutated family protein
XLOC_040879	---NA---
XLOC_040930	PKA52309.1integrator complex subunit 11
XLOC_040931	---NA---
XLOC_040998	XP_022875280.1protein YLS3-like
XLOC_041018	---NA---
XLOC_041023	RVW18695.1Transposon Tf2-11 polyprotein
XLOC_041043	KYP63385.1Retrovirus-related Pol polyprotein from transposon TNT 1-94
XLOC_041050	RVW53095.1Retrovirus-related Pol polyprotein from transposon TNT 1-94
XLOC_041113	PSR95881.1Heme-binding protein like
XLOC_041166	XP_024314247.1mediator of RNA polymerase II transcription subunit 27 isoform X1
XLOC_041184	---NA---
XLOC_041197	PSS31541.1Atherin like
XLOC_041201	KYP56875.1Retrovirus-related Pol polyprotein LINE-1
XLOC_041231	RWR76766.1protein NYNRIN-like protein
XLOC_041253	RVX11253.1putative ribonuclease H protein
XLOC_041273	PSS33870.1Thiosulfate/3-mercaptopyruvate sulfurtransferase
XLOC_041353	---NA---
XLOC_041360	XP_021657216.1elongator complex protein 2
XLOC_041406	XP_023924663.1uncharacterized protein LOC112036069
XLOC_041418	PHT50231.1Threonylcarbamoyladenosine tRNA methylthiotransferase
XLOC_041450	KYP66499.1Enzymatic polyprotein
XLOC_041451	PSR95875.1Protein ApaG like
XLOC_041470	XP_027097338.1piezo-type mechanosensitive ion channel homolog isoform X1
XLOC_041498	XP_015866140.1carboxyl-terminal-processing peptidase 3, chloroplastic
XLOC_041512	PSS33534.1Pentatricopeptide repeat-containing protein
XLOC_041520	XP_009601004.1 glycine-rich RNA-binding protein 4, mitochondrial-like
XLOC_041535	KYP34423.1Retrovirus-related Pol polyprotein LINE-1
XLOC_041543	EOY08376.1DNA/RNA polymerases superfamily protein
XLOC_041544	---NA---
XLOC_041545	OMO94091.1reverse transcriptase
XLOC_041588	PSS33812.1Protein transport protein
XLOC_041614	PSR92593.1Inosine-5'-monophosphate dehydrogenase
XLOC_041621	PSR89439.1Auxin-responsive protein
XLOC_041641	KYP34423.1Retrovirus-related Pol polyprotein LINE-1
XLOC_041688	KYP56875.1Retrovirus-related Pol polyprotein LINE-1
XLOC_041689	PSR86302.1RNA-directed RNA polymerase
XLOC_041690	PSR86303.1Sodium/metabolite cotransporter like
XLOC_041751	---NA---
XLOC_041754	---NA---
XLOC_041759	---NA---
XLOC_041784	---NA---
XLOC_041785	---NA---
XLOC_041793	XP_002299412.1flavanone 3-dioxygenase 3
XLOC_041800	RVW65077.1Retrovirus-related Pol polyprotein from transposon TNT 1-94
XLOC_041879	---NA---
XLOC_041901	PSS36698.1Rabphilin-1 like
XLOC_041904	XP_021663652.1putative disease resistance RPP13-like protein 1
XLOC_041908	PSS11943.1Disease resistance RPP13-like protein
XLOC_041950	PSR98241.1Protein LONGIFOLIA like
XLOC_041975	PSS36623.1Ultraviolet-B receptor like
XLOC_041983	XP_008229578.1 glutathione S-transferase F9-like isoform X1
XLOC_041992	PKA50536.1ataxia telangiectasia mutated family protein
XLOC_041993	---NA---
XLOC_042004	---NA---
[truncated: 382 more rows]

## Sheet: GROUP C
768 elements ARS1 specific rooting C
XLOC_000744	PSS32761.1Serine/threonine-protein kinase
XLOC_000868	XP_010925207.1 calcium-binding mitochondrial carrier protein SCaMC-1-like isoform X1
XLOC_001378	XP_006350528.1 putative aminoacrylate hydrolase RutD
XLOC_001721	XP_010926492.1 protein REDUCED WALL ACETYLATION 3-like
XLOC_001817	---NA---
XLOC_002212	---NA---
XLOC_002445	---NA---
XLOC_002535	XP_010265711.1PREDICTED: uncharacterized protein LOC104603387
XLOC_002679	PSS03090.1PsbP domain-containing protein
XLOC_002851	---NA---
XLOC_002878	XP_019077179.1 UDP-glycosyltransferase 73C3
XLOC_002900	PSS10091.1Flotillin-2 like
XLOC_003007	PSR96336.1Myosin-2 like
XLOC_003018	XP_027073253.1protein LIKE COV 3 isoform X1
XLOC_003074	RVX03272.1ABC transporter B family member 13
XLOC_004200	RVW41746.1DNA (cytosine-5)-methyltransferase CMT2
XLOC_004709	PSS32695.1Protein trichome birefringence-like
XLOC_005066	PSS02877.1ATP-dependent DNA helicase Q-like
XLOC_005190	RWR74797.1DUF659 domain-containing protein/Dimer_Tnp_hAT domain-containing protein
XLOC_005762	PSS15722.1Kinesin-like protein
XLOC_005838	PSS35061.1Protein trichome birefringence-like
XLOC_006113	ANB66341.1MYC2 trancriptor
XLOC_006139	PSS11601.1Poly(U)-specific endoribonuclease-B like
XLOC_006278	PSS01917.1Disease resistance protein like
XLOC_006292	XP_011028027.1 probable inactive serine/threonine-protein kinase fnkC
XLOC_006394	XP_021277355.1probable lactoylglutathione lyase, chloroplastic isoform X2
XLOC_006507	AEC10965.150S ribosomal protein L29
XLOC_006815	PSS06430.1F-box/kelch-repeat protein
XLOC_006870	PSS03072.1Pentatricopeptide repeat-containing protein
XLOC_006953	PNY17540.1putative NAD(P)-binding rossmann-fold protein
XLOC_007464	PSR89347.1Receptor-like protein kinase
XLOC_007623	XP_027071386.1proline-rich receptor-like protein kinase PERK1
XLOC_007849	PSS04865.1LRR receptor-like serine/threonine-protein kinase
XLOC_007882	EOY17074.1 Leucine-rich repeat structural protein ORF147 isoform 1
XLOC_007939	PSS01119.1Histone acetyltransferase
XLOC_008677	---NA---
XLOC_008741	AZL41247.1asparagine synthetase
XLOC_008936	XP_011023656.1 zinc finger protein NUTCRACKER-like
XLOC_009105	PSR90951.1Myosin-1 like
XLOC_009232	---NA---
XLOC_009324	XP_023736360.1probable amidase At4g34880
XLOC_009522	RVW41880.1putative membrane protein YjcL
XLOC_009728	PSR98812.1C-Myc-binding protein
XLOC_009809	XP_010660906.1 myosin-9 isoform X1
XLOC_009837	PSR86321.1Receptor-like kinase
XLOC_010098	PSS06128.1Tetraacyldisaccharide 4'-kinase precursor
XLOC_010146	PSR97967.1E3 ubiquitin-protein ligase HERC1
XLOC_010483	PSR89448.1hypothetical protein CEY00_Acc29649
XLOC_010547	PSR88310.1Coiled-coil domain-containing protein
XLOC_010960	EXC20528.1Protein PLASTID MOVEMENT IMPAIRED 2
XLOC_011012	XP_027111302.1ribonuclease H2 subunit A-like
XLOC_011675	AZL19376.1transcription factor bHLH4
XLOC_011791	PSR93171.1Proliferating cell nuclear antigen large form
XLOC_012101	PSR92572.1Protein DETOXIFICATION like
XLOC_012138	---NA---
XLOC_012169	PSR88310.1Coiled-coil domain-containing protein
XLOC_012689	XP_018822803.1 DNA mismatch repair protein MSH7 isoform X1
XLOC_012783	---NA---
XLOC_012806	PSS29257.1Trichohyalin like
XLOC_012944	XP_023913991.1zinc finger MYM-type protein 1-like
XLOC_013593	PSS32753.1LRR receptor-like serine/threonine-protein kinase
XLOC_013646	PSS26671.1Plastid-lipid-associated protein
XLOC_013824	PSS02996.1Receptor-like protein
XLOC_013828	PSS04605.1Cytochrome P450 89A2 like
XLOC_013994	XP_010663135.1 probable transcription factor KAN2 isoform X2
XLOC_014587	PSR93577.1Pollen receptor-like kinase
XLOC_015046	PSR98358.1Serine/threonine-protein kinase
XLOC_015098	PSS34807.1Crocetin glucosyltransferase
XLOC_015366	EOY22946.1Nucleotide-sensitive chloride conductance regulator (ICln) family protein
XLOC_015713	PSS01405.1Nucleoredoxin
XLOC_015741	PSS06349.12-methyl-6-phytyl-1,4-hydroquinone methyltransferase
XLOC_015825	PSS03161.1DnaJ subfamily C member 14 like
XLOC_015957	XP_021905904.1cyclic nucleotide-gated ion channel 4
XLOC_015967	PSS32921.1GTP diphosphokinase RSH3 precursor
XLOC_016056	XP_018849198.1 NAC domain-containing protein 35-like
XLOC_016570	PSR93160.17-deoxyloganetic acid glucosyltransferase
XLOC_016628	PSS07647.1RecQ-mediated genome instability protein like
XLOC_016677	---NA---
XLOC_016719	---NA---
XLOC_017568	XP_024996318.1G-type lectin S-receptor-like serine/threonine-protein kinase At1g67520
XLOC_017901	---NA---
XLOC_018459	XP_007047144.2 salicylic acid-binding protein 2
XLOC_018469	---NA---
XLOC_018687	XP_022776291.1auxin-responsive protein SAUR40-like
XLOC_018705	PSS31839.1Leucine-rich repeat receptor-like tyrosine-protein kinase
XLOC_019008	AIC83789.1alcohol acyltransferase
XLOC_019096	PQQ08830.1G-type lectin S-receptor-like serine/threonine-protein kinase
XLOC_019782	PON48652.1Glycoside hydrolase
XLOC_019786	OAY63824.1Chlorophyll a-b binding protein 151, chloroplastic
XLOC_019809	EOX99433.1Microtubule-associated protein 6, putative
XLOC_020013	XP_024924216.1protein ALP1-like
XLOC_020070	PSS04986.1Dual specificity phosphatase protein
XLOC_020101	PSS02645.1BTB/POZ domain-containing protein
XLOC_020316	---NA---
XLOC_020664	RVX17848.1Pyruvate dehydrogenase E1 component subunit beta-2, mitochondrial
XLOC_020840	---NA---
XLOC_021621	PSR94993.1MLO-like protein
XLOC_021709	---NA---
XLOC_021815	RVW73600.1putative ribonuclease H protein
XLOC_022110	PSS02799.1Protein DMR6-LIKE OXYGENASE 2 like
XLOC_022440	PSR88011.1B3 domain-containing protein
XLOC_023034	PSS09962.1Methyltransferase-like protein
XLOC_023492	XP_015074800.1DNA polymerase alpha subunit B
XLOC_023499	EOY25697.1Fatty acid hydroxylase 1 isoform 1
XLOC_024067	---NA---
XLOC_024520	PSS23556.1Neuron navigator like
XLOC_024610	XP_021657285.1GDSL esterase/lipase At2g03980 isoform X2
XLOC_024700	---NA---
XLOC_025007	PSS17199.1Maf-like protein
XLOC_025122	PSR96171.1Glyoxylate/succinic semialdehyde reductase
XLOC_025145	KVI10840.1DNA polymerase, Y-family, little finger domain-containing protein
XLOC_025422	XP_012490143.1 WD repeat-containing protein 44-like isoform X1
XLOC_025964	PSS04143.1Scopoletin glucosyltransferase
XLOC_026361	PSR92789.1CRM-domain containing factor CFM3A like
XLOC_026636	PSS21263.1UPF0481 protein
XLOC_026856	XP_002269834.1 acetyl-coenzyme A carboxylase carboxyl transferase subunit alpha, chloroplastic
XLOC_027580	PSR95201.1Protein CNGC15c like
XLOC_027690	AGO05993.1bZIP transcription factor family protein 9
XLOC_027952	PSS07878.1Soyasapogenol B glucuronide galactosyltransferase
XLOC_028011	XP_006469503.1zinc finger CCCH domain-containing protein 18 isoform X3
XLOC_028150	PWA87891.1RNA-directed DNA polymerase, eukaryota, Reverse transcriptase zinc-binding domain protein
XLOC_028660	PSR84909.1MAU2 chromatid cohesion factor like
XLOC_028844	GAV87838.1RVT_2 domain-containing protein
XLOC_029218	RVW85377.1Transcription factor bHLH130
XLOC_029245	PSS11334.1Myosin-3 like
XLOC_029423	XP_010664218.1 sister chromatid cohesion protein PDS5 homolog A isoform X2
XLOC_029460	PSS12122.1Protein CHAPERONE-LIKE PROTEIN OF like
XLOC_030053	PSS28554.1ABC transporter B family member 15 like
XLOC_030337	ADR74193.1 (E)-beta-caryophyllene synthase
XLOC_030397	PSS07767.1Protein MICRORCHIDIA like
XLOC_030596	---NA---
XLOC_030793	PSR89505.1Chromosome partition protein like
XLOC_030856	PSS34679.1Vacuolar cation/proton exchanger like
XLOC_031422	PSR93235.1Protein RETICULATA-RELATED 6 like
XLOC_031655	PSS14665.1Wee1-like protein kinase
XLOC_032160	XP_019250530.1 protein EMBRYO DEFECTIVE 1674-like isoform X1
XLOC_032721	PSS34709.1Ethylene-overproduction protein like
XLOC_033172	XP_027166732.1zinc finger BED domain-containing protein RICESLEEPER 2-like
XLOC_033656	---NA---
XLOC_033980	XP_023756584.1receptor-like kinase TMK4
XLOC_034205	PSR95794.1Ribulose-phosphate 3-epimerase
XLOC_034246	PSS24240.1UDP-D-xylose:L-fucose alpha-1,3-D-xylosyltransferase
XLOC_034289	PSS33186.1Leucine-rich repeat receptor-like protein kinase
XLOC_034690	XP_010646544.1 protein INAPERTURATE POLLEN1-like
XLOC_034733	PSS36559.1MLO-like protein
XLOC_035221	PSS04447.1Plastid-lipid-associated protein
XLOC_035271	PSS30039.1Rhamnogalacturonate lyase
XLOC_035288	XP_022755224.1LRR receptor-like serine/threonine-protein kinase FLS2
XLOC_036521	---NA---
XLOC_036693	PSS04605.1Cytochrome P450 89A2 like
XLOC_037199	---NA---
XLOC_037252	PSS31447.1Soyasapogenol B glucuronide galactosyltransferase
XLOC_037256	XP_015874114.1probable serine/threonine-protein kinase PBL10
XLOC_037489	XP_023895920.1uclacyanin 1-like
XLOC_037871	XP_012087454.1protein CHROMATIN REMODELING 4 isoform X1
XLOC_038265	PSR98199.1Pentatricopeptide repeat-containing protein
XLOC_038969	PSR90018.1Receptor-like protein kinase HERK
XLOC_039049	AVZ45858.1gibberellin 2-oxidase 8
XLOC_039297	---NA---
XLOC_039466	PSR90188.1Chromosome partition protein like
XLOC_039565	PSS05933.1Protein trichome birefringence-like
XLOC_039658	PSR99858.1Protein FAM91A1 like
XLOC_039901	XP_023874885.1lecithin-cholesterol acyltransferase-like 1
XLOC_040030	XP_019078823.1 ankyrin repeat-containing protein At5g02620
XLOC_040256	EOY02751.1Calcium-binding EF-hand family protein, putative
XLOC_040992	XP_027173699.1pentatricopeptide repeat-containing protein At5g02830, chloroplastic isoform X2
XLOC_041110	GAV60340.1DUF679 domain-containing protein
XLOC_041306	XP_009620047.1 calcium-dependent protein kinase 29
XLOC_041343	PSS24828.1Arogenate dehydratase/prephenate dehydratase
XLOC_041521	XP_002275955.2 B3 domain-containing protein At2g36080
XLOC_041601	PSS15765.1Transcription elongation factor like
XLOC_041674	PSS13768.1Homogentisate solanesyltransferase
XLOC_041778	PSR95961.1Sacsin like
XLOC_042186	PSS33506.1Beta-D-glucosyl crocetin beta-1,6-glucosyltransferase
XLOC_042470	PSR96450.1DUF724 domain-containing protein
XLOC_042533	PSS31524.1Inositol-tetrakisphosphate 1-kinase
XLOC_042536	---NA---
XLOC_042641	XP_018856432.1 protein EMBRYO SAC DEVELOPMENT ARREST 3, chloroplastic-like isoform X2
XLOC_042953	PSR86554.1Ciliary rootlet coiled-coil protein
XLOC_042964	PSR90217.1Transcription factor bHLH130 like
XLOC_043192	---NA---
XLOC_043469	PSS23795.1TBC1 domain family member 5 B like
XLOC_043511	PSR89406.1E3 ubiquitin-protein like
XLOC_043550	PSS31577.1Protein ECERIFERUM like
XLOC_043710	PSR98208.1GTPase-activating protein
XLOC_043911	XP_027340508.1translation initiation factor IF-2, chloroplastic
XLOC_043991	XP_002266329.1 serine/threonine-protein kinase STY8 isoform X1
XLOC_044097	PSS17754.1Peptidyl-prolyl cis-trans isomerase
XLOC_044187	PSS05039.1Vacuolar-sorting receptor 6 like
XLOC_044628	PSR94716.1Universal stress protein
XLOC_045274	RVW25323.1putative xyloglucan endotransglucosylase/hydrolase protein 23
XLOC_045304	XP_016580580.1 protein NRT1/ PTR FAMILY 6.4-like
XLOC_045576	PSR92609.1ABC transporter C family member 14 like
XLOC_045608	EXC26782.1 putative methyltransferase TARBP1
XLOC_045689	PSS31409.1Succinate dehydrogenase subunit 5 like
XLOC_046425	XP_022023605.1uncharacterized protein LOC110923858
XLOC_046538	PSS21186.1Serine hydroxymethyltransferaseprecursor
XLOC_046652	PSS10307.1Calcium-binding protein
XLOC_047751	PKA47709.1ataxia telangiectasia mutated family protein
XLOC_047761	XP_010247433.1 probable glutamate carboxypeptidase 2 isoform X1
XLOC_048059	---NA---
XLOC_048319	PSS04293.17,8-diamino-pelargonic acid aminotransferase
XLOC_048321	AYP70949.1xyloglucan endotransglucosylase 11
XLOC_000048	XP_027153794.1D-galacturonate reductase-like
XLOC_000193	XP_009589856.1 S-adenosylmethionine synthase 1
XLOC_000231	---NA---
XLOC_000469	---NA---
XLOC_000635	PSS11974.1Protein lin-37 like
XLOC_000646	PSS16145.1L-ascorbate oxidase
XLOC_000697	PSS31841.1Embryogenesis-associated protein
XLOC_000712	PSS28666.1Two-component response regulator like
XLOC_000911	XP_009589433.1 galacturonokinase isoform X2
XLOC_000922	XP_010249317.1 chalcone synthase
XLOC_000929	PSR91684.1Vesicle-associated protein 2-1, N-terminally processed like
XLOC_000944	XP_002272449.1 cinnamoyl-CoA reductase-like SNL6 isoform X1
XLOC_001116	XP_018817895.1 ABSCISIC ACID-INSENSITIVE 5-like protein 7
XLOC_001152	PSS33624.1E3 ubiquitin-protein ligase RING1-like
XLOC_001184	XP_012092328.1receptor-like protein 12
XLOC_001570	PSR99686.1CRAL-TRIO domain-containing protein
XLOC_001616	PSR96612.1Myb-like protein
XLOC_001622	---NA---
XLOC_001754	EXC19455.1hypothetical protein L484_006150
XLOC_001852	XP_002278515.1 glutaredoxin-C9
XLOC_001924	PSS21654.1Coatomer subunit like
XLOC_001926	PSS08436.1DEAD-box ATP-dependent RNA helicase
XLOC_002177	PSR84612.1Serine carboxypeptidase-like
XLOC_002245	PSR95581.1Nucleolar complex protein
XLOC_002321	PSS07590.1Nuclear pore complex protein
XLOC_002423	XP_011081254.1putative glucuronosyltransferase PGSIP8
XLOC_002505	XP_009396464.1 replication factor C subunit 1 isoform X1
XLOC_002597	PSR96871.1Protein NRT1/ PTR FAMILY 1.2 like
XLOC_002602	PSS07424.1Malonate--CoA ligase
XLOC_002742	XP_020533935.1two-component response regulator ARR9-like
XLOC_002824	XP_011086652.1probable E3 ubiquitin-protein ligase XERICO
XLOC_002982	PSS28607.1Large proline-rich protein
XLOC_002996	---NA---
XLOC_003055	PSS04928.1Vacuolar protein sorting-associated protein
XLOC_003068	XP_002279563.1 receptor protein kinase CLAVATA1
XLOC_003081	PSS11736.1Synaptotagmin-4 like
XLOC_003116	AFD63133.1senescence-associated protein
XLOC_003203	PSS30545.1Protein furry-like
XLOC_003389	PSR93566.1Calcium-binding protein
XLOC_003457	PSR96790.1U-box domain-containing protein
XLOC_003462	PSS04665.1Inositol monophosphatase
XLOC_003512	PSS12133.1Receptor-like serine/threonine-protein kinase
XLOC_003647	PSR86300.1Poly(A)-specific ribonuclease PARN-like
XLOC_003653	XP_027092473.1ferredoxin-2, mitochondrial-like
XLOC_003733	XP_019426244.1 fasciclin-like arabinogalactan protein 11
XLOC_003831	XP_023924182.1WAT1-related protein At3g28050-like isoform X1
XLOC_003922	XP_022864279.1pleiotropic drug resistance protein 1-like
XLOC_003981	PSR94784.1PAX-interacting protein
XLOC_004002	PSS04128.1SPX domain-containing membrane protein
XLOC_004032	PSR95176.1Titin like
XLOC_004289	PSS00383.1Syntaxin-binding protein
XLOC_004312	XP_010253626.1 fasciclin-like arabinogalactan protein 11
XLOC_004768	PON68035.143kDa postsynaptic protein
XLOC_004844	PSS23903.1Long-chain-alcohol oxidase
XLOC_004862	XP_017611233.1 topless-related protein 2-like
XLOC_004904	PSR96941.1Transcription initiation factor TFIID subunit 12b like
XLOC_005082	XP_004133834.1 tubulin gamma-2 chain
XLOC_005095	PSR89611.1Two-component response regulator like
XLOC_005108	XP_019181049.1 transmembrane emp24 domain-containing protein p24beta3-like
XLOC_005266	PSS36454.1NAD(P)H dehydrogenaseFQR1-like
XLOC_005276	PSS04095.1hypothetical protein CEY00_Acc19935
XLOC_005322	PSS30419.1E2F transcription factor-like
XLOC_005344	PSS15867.1Solanesyl diphosphate synthase
XLOC_005410	PSS29431.1AP-3 complex subunit sigma like
XLOC_005427	PSS24439.1Serine carboxypeptidase-like
XLOC_005478	XP_010258630.1 receptor-like protein 12 isoform X1
XLOC_005486	PSS07963.1AT-rich interactive domain-containing protein
XLOC_005521	PWA43591.1metallothionein, family 15
XLOC_005586	PSR85188.1Mitogen-activated protein kinase
XLOC_005646	PSR98237.1Exocyst complex component EXO70A1 like
XLOC_005681	PSS10121.1ATP-dependent DNA helicase Q-like
XLOC_005739	PIN14037.1Phosphatidylinositol transfer protein SEC14
XLOC_005752	---NA---
XLOC_005777	PSS15687.1Calcium-transporting ATPase
XLOC_005778	XP_022766635.1probable calcium-binding protein CML49
XLOC_005781	PSS01775.1Alpha carbonic anhydrase
XLOC_006032	PSS20979.1Ubiquitin carboxyl-terminal hydrolase
XLOC_006089	PSS19762.1Serine carboxypeptidase II-3 chain B like
XLOC_006161	---NA---
XLOC_006215	PSS07255.1Glutamate receptor 2.8 like
XLOC_006230	PSS14405.12-alkenal reductase
XLOC_006343	PSS19788.1Protein gar2 like
XLOC_006369	PSR91216.1Protein IDA like
XLOC_006479	XP_012844795.1 polygalacturonase-1 non-catalytic subunit beta-like
XLOC_006510	PSS34844.12-alkenal reductase
XLOC_006531	---NA---
XLOC_006542	PSR98230.1Uveal autoantigen with coiled-coil domains and ankyrin repeats protein
XLOC_006653	OTF99113.1putative translation elongation factor EF1A, eukaryotic/archaeal
XLOC_006760	PSS33013.1S-type anion channel like
XLOC_006803	XP_006479883.1 glutaredoxin-C11
XLOC_006976	---NA---
XLOC_006991	XP_021282822.1neurofilament medium polypeptide-like
XLOC_007151	PSS11548.1Anthocyanin regulatory C1 protein
XLOC_007198	PSR98258.1Increased DNA methylation like
XLOC_007259	PSR87783.1Receptor-like protein kinase
XLOC_007359	RWR88474.1putative E3 ubiquitin-protein ligase RHC2A
XLOC_007456	PSR85956.1Limonene hydroxylase
XLOC_007579	PSS09499.1Protein like
XLOC_007654	XP_027085660.1phospholipase A1-Ibeta2, chloroplastic-like
XLOC_007727	PSR87537.1Protein SIEVE ELEMENT OCCLUSION B like
XLOC_007915	PSS30488.1Cyclic nucleotide-gated ion channel like
XLOC_007999	XP_011047814.1 copper amine oxidase 1-like isoform X1
XLOC_008008	---NA---
XLOC_008105	XP_016701538.1 peptidyl-prolyl cis-trans isomerase-like
XLOC_008194	XP_019156211.1 probable galacturonosyltransferase-like 1
XLOC_008243	XP_010261579.1 probable protein phosphatase 2C 51
XLOC_008263	PSS09919.1Steroid 5-alpha-reductase
XLOC_008473	PSS26337.1DEAD-box ATP-dependent RNA helicase
XLOC_008489	XP_007038402.1 trehalose-phosphate phosphatase A
XLOC_008532	PWA62269.1zinc finger, CCHC-type
XLOC_008608	PSR96658.1Calcium-dependent protein kinase
XLOC_008642	XP_015896036.130S ribosomal protein S6 alpha, chloroplastic
XLOC_008738	PSR86178.1Protein like
XLOC_008879	PSS03060.1GATA transcription factor
XLOC_008884	RWV90724.1hypothetical protein GW17_00047045
XLOC_008993	PSS31625.1Protein EXORDIUM like
XLOC_009002	---NA---
XLOC_009019	XP_021904125.1LOB domain-containing protein 21
XLOC_009209	---NA---
XLOC_009686	PSR85037.1Glutathione S-transferase
XLOC_009693	---NA---
XLOC_009698	PSR95871.1Pantothenate kinase
XLOC_009714	PSR98045.1Nuclear valosin-containing protein
XLOC_010263	ADL36832.1TCP domain class transcription factor
XLOC_010279	PSR89662.1Arabinosyltransferase ARAD1
XLOC_010309	PSS02877.1ATP-dependent DNA helicase Q-like
XLOC_010329	PSR85174.1E3 ubiquitin-protein like
XLOC_010393	PSS31467.1Cytochrome P450 81F3 like
XLOC_010446	PSS16291.1External alternative NAD(P)H-ubiquinone oxidoreductase
XLOC_010510	PSR99925.1Lecithin-cholesterol acyltransferase-like
XLOC_010517	PSS33839.11,2-dihydroxy-3-keto-5-methylthiopentene dioxygenase
XLOC_010608	PSS16049.1Serine/threonine-protein kinase
XLOC_010691	PSS01237.1Vacuolar-processing enzyme like
XLOC_010725	PSS11800.1Inositol-tetrakisphosphate 1-kinase
XLOC_010749	PSS35144.1Intracellular ribonuclease
XLOC_010805	PSS30799.1Calcium-binding protein
XLOC_010894	RVW92238.1LINE-1 reverse transcriptase-like
XLOC_010952	XP_015874692.1probable LRR receptor-like serine/threonine-protein kinase At1g06840
XLOC_010979	PSS04152.1Protein mesh like
XLOC_010991	XP_024451915.1eukaryotic translation initiation factor 4B1
XLOC_010992	PSR94725.1Protein cordon-bleu like
XLOC_011056	AYA60141.1lysine histidine transporter 4
XLOC_011161	PSR95890.1Copper methylamine oxidase
XLOC_011211	PSS00111.1Wall-associated receptor kinase
XLOC_011264	PSS03091.1Golgi apparatus membrane protein-like protein
XLOC_011495	PSS15797.1Protein pns1 like
XLOC_011547	XP_002270134.1 transcription repressor OFP1
XLOC_011612	PSS21558.1Disease resistance protein
XLOC_011672	XP_018827041.1 probable xyloglucan galactosyltransferase GT17
XLOC_011706	PSS31222.1Nucleoredoxin like
XLOC_012048	PSS30603.1Protein DETOXIFICATION like
XLOC_012055	PSS23776.1Kinesin-like protein
XLOC_012089	NP_001190205.1non-intrinsic ABC protein 9
XLOC_012281	PSR95688.1Vesicle-fusing ATPase
XLOC_012332	XP_002276415.1 laccase-7
XLOC_012343	RWR83310.1hypothetical protein CKAN_01206300
XLOC_012363	PSS02029.1Subtilisin-like protease
XLOC_012419	AFP93964.1metallothionein type 2
XLOC_012590	AIA57520.1NAC domain-containing protein
XLOC_012628	PSS21235.1UPF0553 protein
XLOC_012739	PSR85174.1E3 ubiquitin-protein like
XLOC_012810	XP_027345885.1tubulin alpha chain
XLOC_013162	RVX16817.1Nucleolar protein 6
XLOC_013179	PSS32883.1Zinc finger protein
XLOC_013223	EXC26782.1 putative methyltransferase TARBP1
XLOC_013289	PSS30623.1U-box domain-containing protein
XLOC_013321	PSS32671.1Steroid 5-alpha-reductase
XLOC_013422	---NA---
XLOC_013523	---NA---
XLOC_013532	XP_006443006.1probable fructokinase-4
XLOC_013572	PSS15649.1Chaperone protein like
XLOC_013714	PSS10115.1Spermidine coumaroyl-CoA acyltransferase
XLOC_013742	PSS25982.1Proline-rich receptor-like protein kinase
XLOC_013820	PSS30039.1Rhamnogalacturonate lyase
XLOC_013904	KVH94018.1Glycosyl transferase, family 1
XLOC_014016	PSR88135.1Pectinesterase inhibitor domain protein
XLOC_014261	PSR87854.1U-box domain-containing protein
XLOC_014263	XP_010663514.1 putative disease resistance protein At1g50180 isoform X1
XLOC_014297	XP_017971346.1 mitotic checkpoint protein BUB3.3 isoform X1
XLOC_014425	---NA---
XLOC_014700	XP_027106687.1protein YLS3-like isoform X1
XLOC_014711	XP_024030957.1G-type lectin S-receptor-like serine/threonine-protein kinase At1g11410 isoform X1
XLOC_014717	PSR89873.1DNA polymerase epsilon catalytic subunit A like
XLOC_014749	RVW93317.1Type III polyketide synthase B
XLOC_014933	AGZ20101.1phosphomannomutase isoform 2
XLOC_015003	PWA77683.1C1-like protein
XLOC_015027	---NA---
XLOC_015116	PSS32484.1Microtubule-actin cross-linking factor 1, like
XLOC_015134	PSS08143.1Chitotriosidase-1 like
XLOC_015550	---NA---
XLOC_015578	---NA---
XLOC_015598	PSS18143.11-phosphatidylinositol-3-phosphate 5-kinase
XLOC_015617	PSS15973.1Transcription factor bHLH92 like
XLOC_015855	XP_023910912.1ras-related protein Rab11C
XLOC_015864	PRQ47203.1 putative transcription factor WD40-like family
XLOC_015973	PSR91325.1IQ domain-containing protein
XLOC_016112	XP_018841715.1 histone H4-like
XLOC_016123	XP_022887445.1trihelix transcription factor GT-3b-like
XLOC_016365	PSS01226.1Transcription factor MYB1R1 like
XLOC_016415	PSR89745.1Exocyst complex component EXO84B like
XLOC_016420	EEF35101.1 fimbrin, putative
XLOC_016455	PSS26854.1Potassium transporter like
XLOC_016491	XP_027090913.1dihydrolipoyllysine-residue acetyltransferase component 5 of pyruvate dehydrogenase complex, chloroplastic-like
XLOC_016572	AND76217.1glutathione transferase
XLOC_016659	PSS19862.1Tubulin beta-1 chain
XLOC_016661	XP_027061520.1transcription factor TCP4-like
XLOC_016923	PSR90002.1Ethylene-responsive transcription factor like isoform 1
XLOC_016924	PSR86638.1Ethylene-responsive transcription factor RAP2-7 like
XLOC_016996	PSS06092.1Histone-lysine N-methyltransferase
XLOC_017144	PSS17893.12-oxoglutarate-dependent dioxygenase AOP1.2
XLOC_017605	PSS24599.1Calmodulin like
XLOC_017616	---NA---
XLOC_017726	POO02185.1Survival protein SurE-like phosphatase/nucleotidase
XLOC_017812	PSR98576.1CBS domain-containing protein
XLOC_017956	---NA---
XLOC_017989	PSS26072.1Cold-regulated 413 plasma membrane protein
XLOC_018130	PSS04067.1Pathogenesis-related protein
XLOC_018151	PSS00368.1MLO-like protein
XLOC_018188	PSR98417.1Tyrosyl-DNA phosphodiesterase
XLOC_018576	XP_021599123.1transmembrane protein 184C-like
XLOC_018616	RDX83485.1Leishmanolysin-like peptidase
XLOC_018691	GAV68459.1Thiolase_N domain-containing protein/Thiolase_C domain-containing protein/ABC1 domain-containing protein
XLOC_018725	XP_022856087.1cellulose synthase A catalytic subunit 2 [UDP-forming]-like
XLOC_018730	---NA---
XLOC_018798	---NA---
XLOC_018807	PSS23741.1Soluble inorganic pyrophosphatase
XLOC_018949	PSR86223.1CBL-interacting serine/threonine-protein kinase
XLOC_018968	---NA---
XLOC_019176	XP_012475235.1PREDICTED: uncharacterized protein At1g01500-like
XLOC_019273	XP_021609595.1expansin-like A2
XLOC_019404	XP_022865926.1probable methyltransferase PMT11
XLOC_019472	---NA---
XLOC_019515	PSR87628.1Zinc finger protein
XLOC_019588	PSS19374.1Succinate dehydrogenase assembly factor 1A like
XLOC_019641	PSR97991.1Growth hormone-releasing hormone receptor like
XLOC_019723	RVX08414.1Calmodulin-binding protein 60 C
XLOC_019743	---NA---
XLOC_019792	PSS26429.1Protein NUCLEAR FUSION DEFECTIVE like
XLOC_019847	XP_002263396.3 heavy metal-associated isoprenylated plant protein 41-like
XLOC_019960	PRQ55723.1putative glutathione transferase
XLOC_019961	AND76217.1glutathione transferase
XLOC_020180	XP_024039882.1uncharacterized aarF domain-containing protein kinase At1g71810, chloroplastic isoform X1
XLOC_020191	---NA---
XLOC_020252	PNY16248.1glycosyl transferase (glycosyl transferase family 2)
XLOC_020273	PSS26048.1Receptor-like serine/threonine-protein kinase
XLOC_020608	PSS30156.1Biorientation of chromosomes in cell division protein
XLOC_020625	PSS11489.1Myosin-52 like
XLOC_020628	XP_027092232.1carbamoyl-phosphate synthase large chain, chloroplastic-like
XLOC_020629	XP_010244970.1 LOB domain-containing protein 1-like
XLOC_020917	XP_018838242.1 RNA polymerase sigma factor sigE, chloroplastic/mitochondrial-like
XLOC_020941	XP_002308708.1early nodulin-like protein 1
XLOC_020961	PSS36581.1IST1 like
XLOC_021068	PSR86547.1Anion transporter 5 like
XLOC_021132	PSR93173.1Glucan endo-1,3-beta-glucosidase
XLOC_021273	PSS11733.1Phospholipase D beta like
XLOC_021396	XP_018820139.1 protein ODORANT1-like
XLOC_021466	OVA17387.1Acyl carrier protein (ACP)
XLOC_021511	PSS01554.1Leghemoglobin reductase
XLOC_021613	PSS14154.1Glyoxylate/succinic semialdehyde reductase
XLOC_021797	PSR98438.1Methylthioribose-1-phosphate isomerase
XLOC_021872	PSR91182.1Homologous-pairing protein
XLOC_022165	PSR98193.12-hydroxy-6-oxononadienedioate/2-hydroxy-6- oxononatrienedioate hydrolase
XLOC_022478	PSS00102.1ACT domain-containing protein
XLOC_022635	---NA---
XLOC_022760	PSR86225.1IRK-interacting protein
XLOC_022870	PSR88007.1Dof zinc finger protein like
XLOC_022977	XP_010025469.1 annexin D2
XLOC_023019	---NA---
XLOC_023058	---NA---
XLOC_023071	ABN58480.1cyclin-dependent kinase
XLOC_023459	XP_017982562.1 cysteine-rich receptor-like protein kinase 4
XLOC_023510	PSS01920.12-oxoglutarate-Fe(II) type oxidoreductase
XLOC_023619	OTG25549.1putative histone H27
XLOC_023700	PSR98345.1TRNA modification GTPase
XLOC_023724	XP_002266096.1 WAT1-related protein At5g40240
XLOC_023792	XP_010277179.1 prohibitin-1, mitochondrial
XLOC_023879	AES99104.2hypothetical protein MTR_5g076600
XLOC_023890	XP_006420044.1stem-specific protein TSJT1
XLOC_023891	EOY05805.1DNA repair family protein
XLOC_023901	AFO65511.1actin 2
XLOC_023919	AHB32109.1endoglucanase 6-like protein
XLOC_023989	PSS16400.1Peroxisomal and mitochondrial division factor like
XLOC_024027	PIN07081.1putative hydrolase/acyltransferase (alpha/beta hydrolase superfamily)
XLOC_024045	XP_010108371.1store-operated calcium entry-associated regulatory factor
XLOC_024114	XP_018809209.1 cold-regulated 413 plasma membrane protein 1-like
XLOC_024157	XP_008219369.1 glutathione transferase GST 23-like
XLOC_024191	PSS19368.1Oleoyl-acyl carrier protein thioesteraseprecursor
XLOC_024457	RWR97720.1DUF2232 domain-containing protein
XLOC_024505	PSS11793.1Binding partner of like
XLOC_024541	XP_009369480.1 mitochondrial inner membrane protease subunit 2-like
XLOC_024578	XP_023911034.1receptor-like protein 12
XLOC_024658	PSS07877.1(-)-isopiperitenol/(-)-carveol dehydrogenase
XLOC_024676	---NA---
XLOC_024719	XP_018816875.1 phytoene synthase 2, chloroplastic
XLOC_024799	XP_018836728.1 endoplasmic reticulum metallopeptidase 1-like isoform X1
XLOC_024834	PSS17840.1Topless-related protein
XLOC_024920	PON88688.1Armadillo-type fold containing protein
XLOC_024997	PSS17989.1Phosphatidylinositol/phosphatidylcholine transfer protein
XLOC_025066	PON49143.1Transmembrane protein
XLOC_025072	PSS31841.1Embryogenesis-associated protein
XLOC_025169	XP_011023656.1 zinc finger protein NUTCRACKER-like
XLOC_025178	XP_027090164.1probable pyridoxal 5'-phosphate synthase subunit PDX1
XLOC_025214	XP_024161769.1aquaporin NIP1-1-like
XLOC_025522	PSS02877.1ATP-dependent DNA helicase Q-like
XLOC_025561	---NA---
XLOC_025656	PSS17811.1Myosin-M heavy chain like
XLOC_025689	KMZ66971.1Pantothenate kinase
XLOC_025706	PSS07760.1Short-chain dehydrogenase
XLOC_025729	---NA---
XLOC_025738	PSS26392.1Pentatricopeptide repeat-containing protein
XLOC_025797	XP_002271195.1 15.4 kDa class V heat shock protein
XLOC_025970	PSR91177.1Dihydrolipoyllysine-residue acetyltransferase component 4 of pyruvate dehydrogenase
XLOC_025989	PON47699.1S-adenosyl-l-methionine decarboxylase leader peptide
XLOC_026045	AHL29281.1sucrose synthase 1
XLOC_026119	---NA---
XLOC_026129	XP_027159247.1CCR4-NOT transcription complex subunit 1 isoform X2
XLOC_026141	PSS07424.1Malonate--CoA ligase
XLOC_026408	PSR84530.1Zinc finger BED domain-containing protein
XLOC_026439	XP_015381257.1probable leucine-rich repeat receptor-like protein kinase At1g35710
XLOC_026685	---NA---
XLOC_026764	---NA---
XLOC_026992	XP_018852721.1 pentatricopeptide repeat-containing protein At2g27610-like
XLOC_027232	PSS26096.1Carboxylesterase 13
XLOC_027342	XP_009763054.1 F-box protein PP2-B10-like
XLOC_027803	XP_027338676.1patatin-like protein 7
XLOC_027958	PSS26916.1Protein SIEVE ELEMENT OCCLUSION B like
XLOC_028040	XP_020224665.1pirin-like protein
XLOC_028143	XP_023884310.1shaggy-related protein kinase epsilon isoform X1
XLOC_028161	XP_002284134.1 ruBisCO large subunit-binding protein subunit beta, chloroplastic
XLOC_028288	XP_021650894.1probable cation transporter HKT7
XLOC_028416	PSS32715.1Abscisic acid receptor like
XLOC_028424	PSS17664.1Dehydration-responsive element-binding protein like
XLOC_028486	NP_001295667.1oleosin 18.2 kDa-like
XLOC_028611	PSS23607.1Soluble scavenger receptor cysteine-rich domain-containing protein
XLOC_028614	PSS23607.1Soluble scavenger receptor cysteine-rich domain-containing protein
XLOC_028684	EOX97554.1ACT-like protein tyrosine kinase family protein isoform 1
XLOC_028779	XP_010088151.1protein DMP8
XLOC_028985	PSS34518.1Mitochondrial substrate carrier family protein like
XLOC_029074	RVW36099.1Pentatricopeptide repeat-containing protein
XLOC_029227	PSR98499.1BTB/POZ domain-containing protein
XLOC_029237	PSS15944.1Uridine nucleosidase
XLOC_029243	PSS09361.1Protein kinase
XLOC_029328	XP_018852982.1 signal peptidase complex catalytic subunit SEC11C-like
XLOC_029527	XP_010648268.1 E3 ubiquitin-protein ligase RHA2B-like
XLOC_029608	PSS21052.1Heptahelical transmembrane protein
XLOC_029611	PSS04328.1ABC transporter permease protein YtcP
XLOC_029621	PSS34909.1Cytochrome P450 76A2 like
XLOC_029623	AYQ58355.1Hydroxymethylbutenyl diphosphate reductase
XLOC_029692	RVW85305.1putative cysteine desulfurase
XLOC_029803	XP_027072226.1uncharacterized protein LOC113697007 isoform X2
XLOC_029895	PSS04293.17,8-diamino-pelargonic acid aminotransferase
XLOC_029944	PSS30707.1Ycf36 family protein
XLOC_030349	XP_027070049.1cytochrome P450 93A3-like
XLOC_030524	PNX92072.1Ty3/gypsy retrotransposon protein
XLOC_030529	PSS30491.1Micronuclear linker histone-gamma like
XLOC_030677	PON57718.1Zinc finger, FYVE/PHD-type
XLOC_030700	PSS29238.1K(+) efflux antiporter 3 like
XLOC_030760	PSS04226.1Glucosamine-1-phosphate N-acetyltransferase
XLOC_030901	PSS31886.1Glioma tumor suppressor candidate region protein
XLOC_030912	PSR90029.1Centromere protein like
XLOC_030926	XP_009613435.1 topless-related protein 4 isoform X2
XLOC_031026	XP_023919223.1TMV resistance protein N-like
XLOC_031247	XP_010668985.1 putative F-box/kelch-repeat protein At4g12810
XLOC_031279	PSS32623.1Kinesin-like protein
XLOC_031282	XP_008365221.1 cysteine proteinase inhibitor B-like
XLOC_031292	PSS15722.1Kinesin-like protein
XLOC_031302	PSS17247.1Protein TIC 22 like
XLOC_031319	---NA---
XLOC_031432	PSR95309.1G-type lectin S-receptor-like serine/threonine-protein kinase
XLOC_031533	XP_021289758.1caffeic acid 3-O-methyltransferase
XLOC_031540	PSR86021.1Nodulin homeobox like
XLOC_031627	PSS24484.1Sister chromatid cohesion 1 protein
XLOC_031648	PSS01272.1Methanol O-anthraniloyltransferase
XLOC_031657	PSR94768.1Homeobox protein
XLOC_031671	XP_016652167.1 S-adenosylmethionine decarboxylase proenzyme
XLOC_031714	XP_017442824.1 purple acid phosphatase 8-like isoform X1
XLOC_031753	XP_010243540.1 peptide chain release factor APG3, chloroplastic
XLOC_031772	PSS35960.1Zinc finger protein
XLOC_031911	PSR85990.1E3 ubiquitin-protein ligase BAH1-like
XLOC_032004	PSR93341.1Trehalose-phosphate phosphatase
XLOC_032047	PSS15444.1Ethylene-responsive transcription factor
XLOC_032060	AGV53046.1UDP-glucose flavonoid glucosyl-transferase
XLOC_032086	PSS14031.1E3 ubiquitin-protein ligase XBOS34
XLOC_032131	AGL50916.1chalcone synthase
XLOC_032157	PSS03048.1Protein like
XLOC_032167	PSS11327.1Hydroquinone glucosyltransferase
XLOC_032255	PSS32902.1Processed cyclic AMP-responsive element-binding protein 3-like protein
XLOC_032295	PSS04143.1Scopoletin glucosyltransferase
XLOC_032560	PSR95202.1Von Willebrand factor, type A protein
XLOC_032605	PSR87853.1WD repeat-containing protein
XLOC_032630	---NA---
XLOC_032816	PSS17357.1Mechanosensitive ion channel protein
XLOC_032907	XP_010664603.1 gamma-tubulin complex component 5 isoform X1
XLOC_033021	---NA---
XLOC_033135	XP_002275095.2 protein TPX2
XLOC_033183	PSS01283.1AP-4 complex subunit epsilon like
XLOC_033243	---NA---
XLOC_033339	XP_021679877.1eukaryotic peptide chain release factor subunit 1-3-like
XLOC_033342	PSR86577.1Rho-associated protein kinase
XLOC_033541	PSS00007.1F-box/kelch-repeat protein
XLOC_033558	XP_023883548.1pentatricopeptide repeat-containing protein At1g59720, chloroplastic/mitochondrial
XLOC_033705	PSS33474.1Thymidylate kinase
XLOC_033720	PSR93288.1Histone-lysine N-methyltransferase, H3 lysine-9 specific protein
XLOC_033721	EEF51628.1 cyclin-dependent protein kinase, putative
XLOC_033736	PSS29457.1Receptor-like protein kinase
XLOC_033815	XP_002520211.1metalloendoproteinase 2-MMP
XLOC_033823	PSS00478.1Calcium-dependent protein kinase
XLOC_033885	XP_010659397.1 phosphatidylinositol 4-kinase gamma 2
XLOC_033909	XP_021622228.1protein SRC1
XLOC_034003	PSR91572.1Flavin-containing monooxygenase FMO GS-OX-like
XLOC_034026	PSR91884.1L10-interacting MYB domain-containing protein
XLOC_034032	AHL29281.1sucrose synthase 1
XLOC_034104	PSS36439.1BTB/POZ domain-containing protein
XLOC_034152	PSS21652.1Ran GTPase-activating protein
XLOC_034159	PSS04766.1Helicase-like transcription factor
XLOC_034200	PSS35048.1OTU domain-containing protein
XLOC_034234	XP_010941967.1 pathogenesis-related protein PRB1-3-like
XLOC_034262	PSS00414.1Two-component response regulator like
XLOC_034269	PSS31806.1Ribonucleoprotein like
XLOC_034282	---NA---
XLOC_034373	AFH56411.1ethylene response factor 4
XLOC_034435	PSR99718.1Titin like
XLOC_034441	AGG39691.1bZIP transcription factor bZIP7
XLOC_034635	PSS36620.1Butyrate--CoA ligase AAE11, peroxisomal like
XLOC_034683	PSR99785.1Subtilisin-like protease
XLOC_034887	ALF39596.1long-chain acyl-CoA synthetase 4
XLOC_034906	XP_012078248.1chlorophyllide a oxygenase, chloroplastic
XLOC_034915	PSR87976.1Histone-lysine N-methyltransferase
XLOC_035000	XP_017641702.1 uncharacterized mitochondrial protein AtMg00810-like
XLOC_035078	AHL29281.1sucrose synthase 1
XLOC_035118	---NA---
XLOC_035222	PSS04447.1Plastid-lipid-associated protein
XLOC_035303	PSR94867.1Inorganic phosphate transporter 1-4 like
XLOC_035738	XP_024923258.1dirigent protein 22-like isoform X1
XLOC_035781	PSS28640.1Potassium transporter like
XLOC_035818	XP_018837669.1PREDICTED: uncharacterized protein LOC109003818
XLOC_035864	XP_002276734.2 cycloartenol-C-24-methyltransferase isoform X2
XLOC_035890	XP_022733705.1probable peroxygenase 4 isoform X1
XLOC_036053	PSS13780.1Dirigent protein
XLOC_036056	PSS07941.1LON peptidase N-terminal domain and RING finger protein
XLOC_036065	PSS07940.1Formin-like protein
XLOC_036069	XP_015894246.1putative lysozyme-like protein
XLOC_036127	PSS08338.1NDR1/HIN1-Like protein
XLOC_036143	---NA---
XLOC_036202	---NA---
XLOC_036272	XP_018824073.1 AAA-ATPase At2g18193-like
XLOC_036388	PSS33479.1Protein like
XLOC_036428	PSS31266.15'-3' exoribonuclease
XLOC_036436	PSS13553.1Glutathione S-transferase
XLOC_036531	---NA---
XLOC_036532	PSS01774.1Pyridoxal kinase, N-terminally processed like
XLOC_036650	AJO70149.1myo-inositol 1-phosphate synthase
XLOC_036706	PSS29908.1Cytochrome P450 84A1 like
XLOC_036767	---NA---
XLOC_036876	PSS11084.1Zinc transporter like
XLOC_036964	AGX26650.1S-adenosyl-l-homocysteine hydrolase A
XLOC_036984	XP_026453234.1high mobility group nucleosome-binding domain-containing protein 5-like
XLOC_037008	XP_020695474.1ras-related protein rab7-like
XLOC_037067	PSS28587.1Cytochrome P450 78A5 like
XLOC_037140	PSS07741.1C2 and GRAM domain-containing protein
XLOC_037263	PSS14503.1Glucan endo-1,3-beta-glucosidase
XLOC_037279	PSS36484.1Late embryogenesis abundant protein like
XLOC_037385	---NA---
XLOC_037563	XP_010684666.1 phosphatidylinositol:ceramide inositolphosphotransferase 1-like
XLOC_037600	PON93269.1hypothetical protein TorRG33x02_108400
XLOC_038068	PSS32562.17-deoxyloganetic acid glucosyltransferase
XLOC_038100	---NA---
XLOC_038186	---NA---
XLOC_038482	AHJ09602.1chloroplast beta-amylase 3
XLOC_038489	PSR84928.1CTL-like protein
XLOC_038524	PSS00382.1Serine/arginine-rich splicing factor like
XLOC_038616	---NA---
XLOC_038727	XP_023875597.1UDP-glycosyltransferase 88F3-like
XLOC_038752	PSS00037.130S ribosomal protein
XLOC_039052	PSS10341.1UDP-3-O-acylglucosamine N-acyltransferase
XLOC_039062	PSS26466.1ATP synthase subunit O like
XLOC_039164	XP_023927662.1putative clathrin assembly protein At5g35200
XLOC_039203	PSS36382.1Calcium-transporting ATPase
XLOC_039215	PSS16099.1Cytochrome b561 and DOMON domain-containing protein
XLOC_039435	XP_002515949.1acid phosphatase 1 isoform X1
XLOC_039506	XP_009369668.1 nucleolin
XLOC_039718	XP_012831577.1 probable linoleate 9S-lipoxygenase 5
XLOC_039816	PSS14541.1Dicarboxylate transporter 1 like
XLOC_039821	PSR91639.1AT-hook motif nuclear-localized protein
XLOC_040001	PSS28877.1Rhodanese-like domain-containing protein
XLOC_040034	PSS04615.1ACT domain-containing protein
XLOC_040407	PSR92495.1GPI-anchored adhesin-like protein precursor
XLOC_040564	PSS34685.1Myb family transcription factor
XLOC_040580	PSS01723.1Protein like
XLOC_040866	PSS24426.1Myosin heavy chain kinase
XLOC_040912	PSR86021.1Nodulin homeobox like
XLOC_040995	PSR91014.1Fasciclin-like arabinogalactan protein
XLOC_041269	PSR85360.1RNA-directed RNA polymerase
XLOC_041301	PON44879.1Alpha/Beta hydrolase fold containing protein
XLOC_041310	XP_011003080.1 probable nucleoredoxin 2
XLOC_041363	PSS16061.1Subtilisin-like protease
XLOC_041364	---NA---
XLOC_041488	PIN17743.1UDP-glucose 4-epimerase/UDP-sulfoquinovose synthase
XLOC_041522	XP_018835308.1 B3 domain-containing protein At2g36080-like isoform X1
XLOC_041547	XP_011087481.1protein disulfide-isomerase like 2-1-like
XLOC_041654	---NA---
XLOC_041721	PSS29029.1GDSL esterase/lipase
XLOC_041949	PSR98241.1Protein LONGIFOLIA like
XLOC_041960	XP_024995339.1endoglucanase 5
XLOC_042145	PSS34754.1CBL-interacting serine/threonine-protein kinase
XLOC_042297	PSR95890.1Copper methylamine oxidase
XLOC_042409	PSR89466.1Protein DETOXIFICATION like
XLOC_042684	---NA---
XLOC_042766	---NA---
XLOC_043012	PSR88044.1Scarecrow-like protein
XLOC_043029	XP_017249289.1 F-box protein At3g07870-like
XLOC_043101	PSS02844.1UPF0496 protein
XLOC_043534	PSR86015.1CSC1-like protein
XLOC_043567	PSR86075.1Trigger factor like
XLOC_043571	XP_015892105.1RAN GTPase-activating protein 1
XLOC_043606	PSS29481.1Arginine decarboxylase
XLOC_043847	PSS11846.1Plasma membrane ATPase
XLOC_043876	PSR85105.1Serine hydroxymethyltransferase
XLOC_044034	PSR99735.1Mitogen-activated protein kinase kinase kinase
XLOC_044124	PSR98306.1Fructokinase-4 like
XLOC_044158	AKE33276.11-deoxy-d-xylulose 5-phosphate reductoisomerase
XLOC_044161	PSS17567.1DNA cross-link repair protein
XLOC_044286	---NA---
XLOC_044555	PSS11603.1BOI-related E3 ubiquitin-protein like
XLOC_044630	XP_011079567.1GTP-binding protein SAR1A-like
XLOC_044631	PSR94716.1Universal stress protein
XLOC_044736	PSR89517.1S-adenosyl-L-methionine-dependent methyltransferase
XLOC_044737	NP_001305503.1magnesium/proton exchanger
XLOC_044769	RVW98800.1putative DNA helicase MCM8
XLOC_045016	PSS18246.12,3-bisphosphoglycerate-dependent phosphoglycerate mutase
XLOC_045229	AOR05828.1xyloglucan endotransglycosylase/hydrolase 10
XLOC_045401	XP_021902435.1putative ER lumen protein-retaining receptor C28H8.4 isoform X2
XLOC_045408	PSS31253.1Calponiny domain-containing protein
XLOC_045458	PSS32352.1Spastin like
XLOC_045460	XP_027110181.1reticulon-like protein B2
XLOC_045894	XP_027085778.1inositol monophosphatase 3-like isoform X1
XLOC_046026	XP_002265706.1 phosphatidylinositol 4-phosphate 5-kinase 9 isoform X1
XLOC_046182	PSS15496.1Serine/threonine-protein kinase
XLOC_046447	PSS18129.1Protein of unknown function DUF936, plant protein
XLOC_046453	A5B4D2.1RecName: Full=Translation factor GUF1 homolog, chloroplastic; AltName: Full=Elongation factor 4 homolog; Short=EF-4; AltName: Full=GTPase GUF1 homolog; AltName: Full=Ribosomal back-translocase; Flags: Precursor
XLOC_046619	XP_010241669.1 ylmG homolog protein 1-2, chloroplastic-like
XLOC_046842	PSS13524.1Protein PHYTOCHROME KINASE SUBSTRATE like
XLOC_046943	---NA---
XLOC_046984	PSS21348.1Odorant receptor 98a like
XLOC_047092	PSS24841.1UMP-CMP kinase
XLOC_047148	---NA---
XLOC_047170	---NA---
XLOC_047290	PSS23984.1Clathrin interactor EPSIN like
XLOC_047345	AHL29281.1sucrose synthase 1
XLOC_047363	EEF50806.1 glutaredoxin, grx, putative
XLOC_047378	PSR91177.1Dihydrolipoyllysine-residue acetyltransferase component 4 of pyruvate dehydrogenase
XLOC_047380	PSR84931.1ACD11 protein
XLOC_047598	PSS07400.1(-)-isopiperitenol/(-)-carveol dehydrogenase
XLOC_047611	PSS26266.1Serine/threonine-protein kinase
XLOC_047623	PSR87990.1Transmembrane protein 131-like
XLOC_047735	PON54495.1actin binding protein family
XLOC_047738	PSR96890.1U3 small nucleolar RNA-associated protein like
XLOC_047836	KEH23534.1 DUF1639 family protein
XLOC_047972	PSS15541.1Meiotic nuclear division protein
XLOC_048066	PSS24275.1Growth-regulating factor like
XLOC_048087	XP_027337374.1uncharacterized protein LOC113851088
XLOC_048170	PSR98616.1Glutamate receptor 2.7 like
XLOC_048172	PSR98616.1Glutamate receptor 2.7 like
XLOC_048280	PSS09489.1Cell division cycle protein like
XLOC_048315	PSS35848.1Protein YIF1B-B like

## Sheet: GROUP D
120 elements ARS1 specific rooting D
XLOC_000273	---NA---
XLOC_000312	---NA---
XLOC_006709	XP_011010945.1 BAG family molecular chaperone regulator 2
XLOC_009111	PSS13987.1MADS-box protein
XLOC_009348	PSR85040.1Protein NRT1/ PTR FAMILY 2.13 like
XLOC_010340	---NA---
XLOC_012983	AOY34426.1transcription factor BHLH055
XLOC_013684	PSR96521.1Potassium transporter like
XLOC_015393	---NA---
XLOC_017367	XP_018835508.1 gibberellin 2-beta-dioxygenase 8
XLOC_017887	XP_019179430.1 E3 ubiquitin-protein ligase MIEL1
XLOC_021258	XP_009600543.1 zeatin O-glucosyltransferase-like
XLOC_021369	XP_002281334.1 alcohol dehydrogenase 1 isoform X2
XLOC_021382	PSS33932.11-deoxy-D-xylulose-5-phosphate synthase
XLOC_021418	XP_019078846.1PREDICTED: uncharacterized protein LOC100252779
XLOC_022235	---NA---
XLOC_025319	---NA---
XLOC_025702	XP_021282213.1polygalacturonase inhibitor-like
XLOC_026032	---NA---
XLOC_028540	XP_024981866.1polygalacturonase inhibitor-like
XLOC_028546	XP_024981866.1polygalacturonase inhibitor-like
XLOC_030355	PSR92512.1Bifunctional TENA-E protein
XLOC_030798	PSR95922.1Nuclear speckle splicing regulatory protein like
XLOC_035354	XP_018846882.1 basic 7S globulin-like
XLOC_036508	---NA---
XLOC_038073	PSS19475.1alcohol dehydrogenase
XLOC_038452	AWH62807.1resveratrol O-methyltransferase-like protein
XLOC_040960	XP_019236181.1 bZIP transcription factor 11-like
XLOC_043617	PSR88125.1Nudix hydrolase
XLOC_043759	PSS28927.1E3 ubiquitin-protein like
XLOC_046817	XP_019081933.1 NF-X1-type zinc finger protein NFXL1
XLOC_047515	XP_023895611.1acyl-CoA--sterol O-acyltransferase 1-like
XLOC_047712	XP_022844378.1E3 ubiquitin-protein ligase ATL59-like
XLOC_047960	PSS32488.1Expansin-A8 like
XLOC_047981	PSS08252.1Auxin-responsive protein
XLOC_001454	PSS17591.1Nucleotide-diphospho-sugar transferase protein
XLOC_001840	PSS30105.1Legume lectin domain protein
XLOC_002993	PSR88014.1Protein monoglycylase
XLOC_003269	PSS15437.1Disks large like
XLOC_003465	AEX07363.1cycloidea-like 6
XLOC_003769	XP_020264310.1hydrophobic protein RCI2A-like
XLOC_003968	PSS07639.1Bidirectional sugar transporter like
XLOC_004529	XP_018855745.1 disease resistance protein RPP8-like
XLOC_005210	PSS32884.1Heavy metal-associated isoprenylated plant protein
XLOC_005214	---NA---
XLOC_006327	---NA---
XLOC_007015	PSS36609.1Legume lectin, beta chain, Mn/Ca-binding site protein
XLOC_007375	XP_021297386.1F-box protein At2g32560-like isoform X1
XLOC_007964	PSS04102.1Protein LITTLE ZIPPER like
XLOC_008821	PSS30844.1suppressor of gene silencing like protein
XLOC_009440	PSS09475.1Josephin-like protein
XLOC_010516	XP_022760182.11,2-dihydroxy-3-keto-5-methylthiopentene dioxygenase 2-like
XLOC_010638	XP_012078512.1probable galactinol--sucrose galactosyltransferase 1
XLOC_012613	PSS07495.1Auxin-responsive protein
XLOC_012973	XP_021832184.1protein DOG1-like 4
XLOC_013346	---NA---
XLOC_015301	XP_010037991.1 1-aminocyclopropane-1-carboxylate oxidase homolog 1 isoform X1
XLOC_015304	XP_002514739.1thioredoxin-like 1-2, chloroplastic
XLOC_016904	XP_018809222.1 crocetin glucosyltransferase, chloroplastic-like
XLOC_018126	ADM88555.1lactate dehydrogenase
XLOC_018518	XP_018845474.1 early nodulin-93-like
XLOC_019331	PSR98169.1Leucine-rich repeat extensin-like protein
XLOC_022114	ABF60002.1lipoxygenase 2
XLOC_022799	ANB66337.11-deoxy-D-xylulose-5-phosphate synthase
XLOC_023276	AFQ39766.1polygalacturonase-inhibiting protein
XLOC_023289	PSS04316.1WAT1-related protein
XLOC_024861	PSS11246.1Methionine gamma-lyase
XLOC_025721	EOY23980.1 PLATZ transcription factor family protein isoform 1
XLOC_026359	---NA---
XLOC_027182	---NA---
XLOC_027568	PSS30718.1Cytochrome P450 81E8 like
XLOC_028343	PSR90245.1Transmembrane protein like
XLOC_028716	XP_021599985.1dof zinc finger protein DOF1.4-like
XLOC_029326	PSS07468.1Metallothiol transferase
XLOC_029339	PON56925.1Voltage dependent potassium channel
XLOC_029969	PSR89063.1Transcription factor BEE like
XLOC_031009	AZL19543.1transcription factor MBF1
XLOC_031582	PON83378.1CBS domain containing protein
XLOC_032117	XP_021645860.1translationally-controlled tumor protein homolog
XLOC_032604	PSR96407.1Zinc transporter 5 like
XLOC_032657	PSS29276.1Zinc finger protein
XLOC_033245	PSR93139.1Wall-associated receptor kinase-like
XLOC_034029	XP_010089121.1probable copper-transporting ATPase HMA5
XLOC_034094	PSS31376.1Histone-lysine N-methyltransferase
XLOC_034973	AYQ58362.1P(E)-nerolidol/(E,E)-geranyl linalool synthase
XLOC_035518	PSS17428.1Laccase-14 like
XLOC_036178	ABF60002.1lipoxygenase 2
XLOC_036319	PSR98487.1Peroxiredoxin-2E-2 like
XLOC_038019	ABF60002.1lipoxygenase 2
XLOC_038477	PON33146.1MORN motif
XLOC_038875	RWR88867.1hevein-like preproprotein
XLOC_038881	XP_016713193.1 pathogenesis-related protein PR-4-like
XLOC_039695	PSS04315.1Protein ECERIFERUM like
XLOC_039715	PSS10131.1Linoleate 9S-lipoxygenase
XLOC_040024	---NA---
XLOC_040475	XP_021651354.1gibberellin-regulated protein 3-like
XLOC_041369	PSS23929.1Crocetin glucosyltransferase
XLOC_042574	PSS03965.1Protein DETOXIFICATION like
XLOC_043362	XP_013460468.1probable glutathione S-transferase parA
XLOC_043472	XP_016753103.1 17.3 kDa class I heat shock protein-like
XLOC_044506	PSR88395.1Ureide permease
XLOC_044721	PSS14691.1Lipid-phosphate phosphatase
XLOC_045475	---NA---
XLOC_045856	ALO19896.1UDP-glycosyltransferase 74B5
XLOC_046167	---NA---
XLOC_046557	XP_022755366.1protein ECERIFERUM 3 isoform X2
XLOC_046651	PSS24740.1B-box zinc finger protein
XLOC_047058	XP_011089652.1cytochrome P450 82C2
XLOC_047648	XP_002272852.1 glutaredoxin-C1
XLOC_047775	---NA---
XLOC_047982	PSS08252.1Auxin-responsive protein
XLOC_008337	AZL19357.11-aminocyclopropane-1-carboxylate oxidase 7
XLOC_010356	PSS35093.1NADH dehydrogenase [ubiquinone] 1 alpha subcomplex subunit like
XLOC_018128	PSS11521.1Root meristem growth factor 6 like
XLOC_026189	OMO99362.1hypothetical protein CCACVL1_03837
XLOC_026684	AZL19357.11-aminocyclopropane-1-carboxylate oxidase 7
XLOC_032344	XP_018817177.1 protein GAST1
XLOC_034879	XP_021613971.1transcription factor PRE6
XLOC_037958	XP_006833223.1heavy metal-associated isoprenylated plant protein 3 isoform X1
XLOC_039437	PSS18026.1ATP-dependent 6-phosphofructokinase

## Sheet: GROUP E
739 elements ARS1 specific rooting E
XLOC_000846	XP_022851118.1intracellular protein transport protein USO1-like
XLOC_001069	PSR95660.1Double-strand break repair protein
XLOC_001214	---NA---
XLOC_002456	PSS29908.1Cytochrome P450 84A1 like
XLOC_003861	PSS04781.1Stem-specific protein
XLOC_004324	PSR92489.1Cell wall / vacuolar inhibitor of fructosidase
XLOC_004742	OVA10864.1Pentatricopeptide repeat
XLOC_005131	XP_027340039.1ribulose bisphosphate carboxylase/oxygenase activase, chloroplastic isoform X2
XLOC_005156	RVW48943.1Transposon TX1 uncharacterized 149 kDa protein
XLOC_007318	XP_023874979.1uncharacterized protein LOC111987485
XLOC_007459	RVX17371.1putative ribonuclease H protein
XLOC_010606	PSS05893.1Leucine-rich repeat receptor-like serine/threonine-protein kinase
XLOC_010944	XP_021603818.1cytochrome P450 87A3-like
XLOC_011043	---NA---
XLOC_011070	PSR94710.1Protein trichome birefringence-like
XLOC_012960	---NA---
XLOC_013140	PSR93203.1NF-X1-type zinc finger protein
XLOC_013769	XP_002281889.1 BEL1-like homeodomain protein 4
XLOC_015773	---NA---
XLOC_016154	XP_009594768.1 FT-interacting protein 1-like
XLOC_016792	PSS07993.1Zinc finger CCCH domain-containing protein
XLOC_017661	---NA---
XLOC_018647	PKA47214.1ataxia telangiectasia mutated family protein
XLOC_021089	KJB70660.1hypothetical protein B456_011G085800
XLOC_023515	---NA---
XLOC_023585	PSS00213.1Pyrophosphate-energized vacuolar membrane proton pump (H(+)-PPase) like
XLOC_024415	RVW95836.1Stem-specific protein TSJT1
XLOC_024924	PKA50536.1ataxia telangiectasia mutated family protein
XLOC_025285	PWA92720.1reverse transcriptase domain-containing protein
XLOC_026883	RVW92496.1Pentatricopeptide repeat-containing protein
XLOC_027661	PSS34381.1Ethylene-responsive transcription factor
XLOC_027847	XP_018814518.1 E3 ubiquitin-protein ligase SDIR1 isoform X4
XLOC_029498	PSS11264.1StAR-related lipid transfer protein like
XLOC_029509	---NA---
XLOC_029732	---NA---
XLOC_031517	---NA---
XLOC_032338	XP_010654234.1 BEL1-like homeodomain protein 9
XLOC_034481	---NA---
XLOC_035975	PRQ21495.1putative glycosidase
XLOC_036907	RVW64625.1Retrovirus-related Pol polyprotein from transposon TNT 1-94
XLOC_036997	PRQ52491.1putative RNA-directed DNA polymerase
XLOC_037359	---NA---
XLOC_038518	XP_013665327.1uncharacterized protein LOC106369758
XLOC_039256	PSS24030.1Hydroxyethylthiazole kinase
XLOC_040538	PSS11286.1RNA methyltransferase
XLOC_040589	PON69249.1protamine P1 family protein
XLOC_041817	---NA---
XLOC_043399	RVX08315.1Retrovirus-related Pol polyprotein from transposon RE1
XLOC_043959	XP_024033090.1probable phytol kinase 3, chloroplastic
XLOC_044301	---NA---
XLOC_044958	PKU61034.1putative mitochondrial protein
XLOC_045223	CBL94163.1putative RNA-directed DNA polymerase (Reverse transcriptase)
XLOC_045438	PSS03012.1Plant-specific TFIIB-related protein
XLOC_046156	---NA---
XLOC_000033	KYP62388.1Retrovirus-related Pol polyprotein from transposon TNT 1-94
XLOC_000034	---NA---
XLOC_000104	---NA---
XLOC_000170	AEN02469.1germin-like protein
XLOC_000215	PSS30229.1Diacylglycerol kinase
XLOC_000230	XP_024438520.1zinc finger MYM-type protein 1
XLOC_000262	---NA---
XLOC_000337	PSR86660.1LRR receptor-like serine/threonine-protein kinase
XLOC_000419	XP_021601648.1transcription factor MYB44-like
XLOC_000568	XP_024926210.1myosin-11 isoform X2
XLOC_000607	XP_009628313.1 myosin-9-like isoform X1
XLOC_000609	XP_008461146.1 F-box/LRR-repeat protein 20
XLOC_000669	XP_023926826.1molybdenum cofactor sulfurase-like
XLOC_000677	---NA---
XLOC_000745	RVW42755.1putative mitochondrial protein
XLOC_000780	AEL30371.1TIR-NBS-LRR type disease resistance protein
XLOC_000815	---NA---
XLOC_000860	XP_010263781.1 lysine histidine transporter-like 8
XLOC_000873	PSS35227.150S ribosomal protein
XLOC_000878	---NA---
XLOC_001040	XP_018834363.1 putative proline-rich receptor-like protein kinase PERK11 isoform X1
XLOC_001237	PSR91333.1Anthranilate N-benzoyltransferase protein
XLOC_001271	XP_023894684.1uncharacterized protein LOC112006613
XLOC_001299	XP_027079938.1ABC transporter B family member 10-like
XLOC_001480	PSS13684.1Squamosa promoter-binding-like protein
XLOC_001502	XP_024443831.1probable LRR receptor-like serine/threonine-protein kinase At1g53440 isoform X1
XLOC_001598	KYP56875.1Retrovirus-related Pol polyprotein LINE-1
XLOC_001666	---NA---
XLOC_001740	---NA---
XLOC_001893	PSR91019.1Protein ACCUMULATION AND REPLICATION OF CHLOROPLASTS 3 like
XLOC_001922	PSS08436.1DEAD-box ATP-dependent RNA helicase
XLOC_002014	---NA---
XLOC_002103	PSS03929.1DmX-like protein
XLOC_002208	PSS29461.1Chromatin remodeling protein like
XLOC_002213	---NA---
XLOC_002296	XP_023887255.1GDSL esterase/lipase 1-like
XLOC_002341	PSR89547.1Conserved oligomeric Golgi complex subunit 2 like
XLOC_002385	BAW35440.1desiccation-related protein
XLOC_002604	XP_010648509.1 protein EMBRYONIC FLOWER 1
XLOC_002842	PSS21583.1Somatic embryogenesis receptor kinase
XLOC_002844	PSS08370.1Serine/threonine-protein kinase cdc7
XLOC_002879	PSS04621.1Protein SHOOT GRAVITROPISM like
XLOC_003011	---NA---
XLOC_003026	PSS35031.1Zinc finger CCCH domain-containing protein
XLOC_003042	PSS36149.1Two-component response regulator like
XLOC_003084	XP_027115021.1receptor-like serine/threonine-protein kinase At2g45590
XLOC_003110	PSS21583.1Somatic embryogenesis receptor kinase
XLOC_003387	PSS28533.1Serine/threonine-protein kinase
XLOC_003397	PSS01416.1Calcium-transporting ATPase
XLOC_003425	PSR92792.1RNA polymerase-associated protein
XLOC_003431	---NA---
XLOC_003516	PSS31564.1Rop guanine nucleotide exchange factor like
XLOC_003519	---NA---
XLOC_003713	PSS15578.1Inactive cyclic nucleotide-dependent protein kinase
XLOC_003800	PSS07271.1Protein STRUBBELIG-RECEPTOR FAMILY 6 like
XLOC_003835	---NA---
XLOC_003889	PKA61482.1putative mitochondrial protein
XLOC_003909	XP_012090413.1protein LOW PSII ACCUMULATION 2, chloroplastic
XLOC_003931	---NA---
XLOC_003938	PSS11759.1TATA-binding protein-associated factor like
XLOC_004390	XP_027072482.1auxin transporter-like protein 2
XLOC_004424	RVW78414.1Retrovirus-related Pol polyprotein from transposon RE1
XLOC_004433	XP_007013487.2 early nodulin-like protein 2
XLOC_004437	PWA90654.1Retrovirus-related Pol polyprotein from transposon TNT 1-94
XLOC_004463	---NA---
XLOC_004473	XP_002268101.2PREDICTED: uncharacterized protein LOC100261869
XLOC_004480	AEL30371.1TIR-NBS-LRR type disease resistance protein
XLOC_004498	---NA---
XLOC_004597	PKA47709.1ataxia telangiectasia mutated family protein
XLOC_004628	PSS30722.1Transcription factor like
XLOC_004703	PSS32694.1Phosphoinositide phosphatase
XLOC_004726	PSS21505.1BTB/POZ domain-containing protein
XLOC_004799	PSS06228.1Heavy metal-associated isoprenylated plant protein
XLOC_004938	PSS30451.1ABC transporter B family member 19 like
XLOC_004940	---NA---
XLOC_005081	PSS26289.1Hydroquinone glucosyltransferase
XLOC_005089	PSR91007.1Histidine kinase
XLOC_005143	AJO70152.1disproportionating enzyme 2
XLOC_005178	PSS34623.1Ataxin-3 like
XLOC_005218	---NA---
XLOC_005242	AGT29356.1xyloglucan endotransglucosylase/hydrolase 6
XLOC_005287	---NA---
XLOC_005291	PSS36645.1Kinesin light chain like
XLOC_005310	XP_002279197.1 proline-rich receptor-like protein kinase PERK1
XLOC_005368	PSS15658.1DNA-directed RNA polymerase subunit beta like
XLOC_005558	---NA---
XLOC_005633	XP_018823086.1 probable bifunctional methylthioribulose-1-phosphate dehydratase/enolase-phosphatase E1 isoform X1
XLOC_005661	PSR89479.1Cytochrome P450 71A8 like
XLOC_005668	PSS33116.1TraB domain-containing protein
XLOC_005797	PSR88338.1Paired amphipathic helix protein Sin3-like
XLOC_005992	PSR95743.1Serine protease
XLOC_006208	---NA---
XLOC_006258	PSS11659.1Protein LHY like
XLOC_006283	PSS00327.1Ferric reduction oxidase
XLOC_006309	PSS07537.1Sodium-coupled neutral amino acid transporter 6
XLOC_006329	PSS15442.1Auxin response factor like
XLOC_006374	XP_011078413.1heptahelical transmembrane protein 1
XLOC_006377	PSR92471.1Inactive DNA (cytosine-5)-methyltransferase DRM3
XLOC_006438	XP_016481727.1 DNA mismatch repair protein MSH5-like isoform X3
XLOC_006465	---NA---
XLOC_006544	PSR98221.1Flagellar hook-associated protein like
XLOC_006589	BAO51833.1UDP-glycosyltransferase 85K10
XLOC_006683	XP_007048873.2 probable WRKY transcription factor 71
XLOC_006821	EEF41650.1conserved hypothetical protein
XLOC_006893	PSS19778.1Histone deacetylase complex subunit like
XLOC_007123	PSR91237.1Chaperonin 60 subunit beta 4 like
XLOC_007187	AHY02120.1histone H2A12
XLOC_007244	PSS10286.1B3 domain-containing protein
XLOC_007336	PNY07765.1putative copia-type polyprotein
XLOC_007340	XP_002285355.1 LIM domain-containing protein WLIM1
XLOC_007400	PKU64612.1integrator complex subunit 11
XLOC_007462	XP_026380748.1heavy metal-associated isoprenylated plant protein 21-like
XLOC_007535	RVW53096.1Retrovirus-related Pol polyprotein from transposon TNT 1-94
XLOC_007576	---NA---
XLOC_007637	PSS26778.1Cysteine-rich repeat secretory protein like
XLOC_007686	---NA---
XLOC_007759	---NA---
XLOC_007789	PSR93441.1Zinc finger Ran-binding domain-containing protein
XLOC_007910	---NA---
XLOC_007925	PSS20996.1Anion transporter 6 like
XLOC_007945	PSS07713.1GDSL esterase/lipase
XLOC_007966	PSS04103.1Ycf49-like protein
XLOC_007990	PSS32952.1StAR-related lipid transfer protein like
XLOC_008044	PSS29473.1Zinc finger CCCH domain-containing protein
XLOC_008120	PSR89816.1Protein IQ-DOMAIN like
XLOC_008132	---NA---
XLOC_008137	---NA---
XLOC_008179	PSR99691.1Wall-associated receptor kinase-like
XLOC_008394	PSR87614.1Protein NRT1/ PTR FAMILY 5.8 like
XLOC_008437	PSS09497.1Increased DNA methylation like
XLOC_008514	XP_012080011.1probable LRR receptor-like serine/threonine-protein kinase At4g26540
XLOC_008854	XP_016686119.1 isoamylase 1, chloroplastic-like
XLOC_008915	PSS06297.1Eukaryotic translation initiation factor 4E transporter like
XLOC_009049	---NA---
XLOC_009100	PSS33359.1Scarecrow-like protein
XLOC_009173	PSS16339.1ATP synthase protein like
XLOC_009221	AYA73394.1WRKY transcription factor 65
XLOC_009284	PSR92443.1SWI/SNF-related matrix-associated actin-dependent regulator of chromatin subfamily A-like protein
XLOC_009317	RVW40790.1putative ribonuclease H protein
XLOC_009320	AEJ72569.1putative reverse transcriptase family member
XLOC_009331	PSR89332.1Protein TSS like
XLOC_009350	XP_022741808.13-epi-6-deoxocathasterone 23-monooxygenase-like
XLOC_009369	PSS10091.1Flotillin-2 like
XLOC_009378	PSS30635.1Glycine-rich domain-containing protein
XLOC_009381	PSS15503.1Heat shock factor protein
XLOC_009449	OUZ99275.1Multicopper oxidase
XLOC_009496	AOY34376.1transcription factor BHLH005
XLOC_009546	XP_012472375.1PREDICTED: uncharacterized protein LOC105789545
XLOC_009597	PSS15924.1Glutathione S-transferase-like protein
XLOC_009598	PSS23583.1Alpha carbonic anhydrase
XLOC_009615	PSS06378.1Inactive patatin-like protein
XLOC_009656	---NA---
XLOC_009719	XP_023871937.1isoamylase 1, chloroplastic isoform X2
XLOC_009747	---NA---
XLOC_009977	PSR95194.1Homeobox-leucine zipper protein like
XLOC_010243	XP_002528105.1chlorophyll a-b binding protein CP29.1, chloroplastic
XLOC_010426	---NA---
XLOC_010530	AFB82644.1NAC transcription factor
XLOC_010533	XP_022886393.1photosystem II 10 kDa polypeptide, chloroplastic
XLOC_010557	PSS24002.1NADH-ubiquinone oxidoreductase
XLOC_010580	PSS24429.1Disease resistance RPP13-like protein
XLOC_010585	EMS49379.1Retrovirus-related Pol polyprotein LINE-1
XLOC_010649	XP_007027253.2 interactor of constitutive active ROPs 2, chloroplastic
XLOC_010719	PSS34606.1UPF0481 protein
XLOC_010723	ACD03213.1xyloglucan endotransglucosylase/hydrolase 3
XLOC_010726	PSR91738.1Cytochrome P450 711A1 like
XLOC_010763	PSR95701.1Nuclear pore complex protein like
XLOC_010830	PSS17232.1Lysine histidine transporter-like
XLOC_010856	PSS31346.1Pre-mRNA-splicing factor like
XLOC_010874	XP_021688993.1xyloglucan endotransglucosylase/hydrolase protein 9
XLOC_011092	PSS15837.1Atrophin-1 like
XLOC_011141	XP_011090312.1NDR1/HIN1-like protein 1
XLOC_011247	XP_022767608.1protein RETICULATA, chloroplastic-like
XLOC_011284	---NA---
XLOC_011473	PSS10150.1Heavy metal-associated isoprenylated plant protein
XLOC_011558	ACH87169.1MYB transcription factor
XLOC_011603	PSS00117.1NAD(P)H-quinone oxidoreductase subunit M like
XLOC_011613	XP_003635142.1 dof zinc finger protein DOF1.1 isoform X2
XLOC_011650	PSS13905.1UPF0481 protein
XLOC_011671	XP_027077238.1protein S-acyltransferase 10-like
XLOC_011695	XP_022847374.1L10-interacting MYB domain-containing protein-like
XLOC_011710	PON83315.1P-loop containing nucleoside triphosphate hydrolase
XLOC_011785	AUD40407.1DELLA protein 3
XLOC_011803	XP_021660532.1indole-3-pyruvate monooxygenase YUCCA6-like
XLOC_011809	XP_027067043.1DExH-box ATP-dependent RNA helicase DExH10-like isoform X1
XLOC_011956	---NA---
XLOC_012019	PSR94820.1Serine/threonine-protein kinase
XLOC_012118	---NA---
XLOC_012222	RVX06168.1Lysosomal Pro-X carboxypeptidase
XLOC_012243	---NA---
XLOC_012583	---NA---
XLOC_012765	GAV93080.1zf-RVT domain-containing protein
XLOC_012815	PSS26149.1F-box protein
XLOC_012928	PSS32596.1CAMP-specific 3',5'-cyclic phosphodiesterase, like
XLOC_012999	PSS17794.1Fe(3+) ions import ATP-binding protein like
XLOC_013126	PSS35041.1Mannose-6-phosphate isomerase
XLOC_013153	XP_018848828.1 probable glutamate carboxypeptidase 2
XLOC_013157	XP_010247433.1 probable glutamate carboxypeptidase 2 isoform X1
XLOC_013190	XP_018829558.1 alpha-mannosidase
XLOC_013225	YP_009179554.1 hypothetical chloroplast RF68 (chloroplast)
XLOC_013322	RVW73600.1putative ribonuclease H protein
XLOC_013326	PSS32544.1Auxin transporter-like protein
XLOC_013373	XP_012842807.1 adenosine kinase
XLOC_013381	XP_018811911.1 BON1-associated protein 2-like
XLOC_013426	XP_018859878.1 transcriptional regulator DEF1-like
XLOC_013445	PSR96989.1FMN-binding split barrel protein
XLOC_013476	XP_027172420.1protein CONSERVED ONLY IN THE GREEN LINEAGE 160, chloroplastic
XLOC_013502	---NA---
XLOC_013723	XP_002281805.1 calcium uniporter protein 4, mitochondrial
XLOC_013738	XP_027062546.1probable WRKY transcription factor 31
XLOC_013755	GAV67895.1PEARLI-4 domain-containing protein
XLOC_013926	PSS30305.1BRO1 domain-containing protein
XLOC_013928	PSR87450.1Protein AUXIN SIGNALING F-BOX like
XLOC_013977	XP_010650198.2 myosin-6 isoform X1
XLOC_013993	XP_023897043.1leucine-rich repeat extensin-like protein 4
XLOC_014156	PSR98055.1Phosphoglucan phosphatase DSP4
XLOC_014186	XP_002280359.1 peroxidase 65
XLOC_014317	PSR94917.1Transcriptional corepressor like
XLOC_014380	PSR93024.1E3 SUMO-protein like
XLOC_014604	PSR86569.1Maintenance of mitochondrial morphology protein like
XLOC_014654	XP_012854869.1 pheophytinase, chloroplastic
XLOC_014678	RVW80412.1putative ribonuclease H protein
XLOC_014811	PSR92977.1Myosin-11 like
XLOC_014958	PSS08009.1UspA protein
XLOC_015440	PSR88144.1NAD(P)H-quinone oxidoreductase subunit L like
XLOC_015493	PSR84973.1DnaJ subfamily B member like
XLOC_015545	---NA---
XLOC_015571	AML79205.1putative LOV domain-containing protein
XLOC_015645	XP_023915452.1putative disease resistance protein RGA3
XLOC_015767	XP_003553421.1DNA-binding protein SMUBP-2
XLOC_015817	PSR91135.1UDP-N-acetylmuramate--L-alanine ligase
XLOC_015849	PSS33793.1Pentatricopeptide repeat-containing protein
XLOC_015946	XP_023914746.1 cysteine-rich receptor-like protein kinase 10
XLOC_015950	PSS10340.1Cysteine-rich receptor-like protein kinase
XLOC_015975	PSR91738.1Cytochrome P450 711A1 like
XLOC_016163	---NA---
XLOC_016249	PSS01671.1Double-stranded RNA-binding protein
XLOC_016381	PSS26261.1Nucleosomal histone kinase
XLOC_016556	PSS05947.1Protein NRT1/ PTR FAMILY 6.4 like
XLOC_016577	PSS31550.1Flavin-containing monooxygenase
XLOC_016662	PSS10418.1Cytochrome b561 and DOMON domain-containing protein
XLOC_016763	PSS17662.1Protein trichome birefringence-like
XLOC_016821	PSR92656.1Serine/threonine-protein kinase
XLOC_016844	PSS36293.1DNA-3-methyladenine glycosylase
XLOC_016867	GAV77028.1p450 domain-containing protein
XLOC_016877	---NA---
XLOC_016934	---NA---
XLOC_017023	---NA---
XLOC_017159	PSS32387.1Intracellular protein transport protein
XLOC_017311	PSS31320.1Inositol-pentakisphosphate 2-kinase
XLOC_017372	---NA---
XLOC_017389	PSS32391.1Protein Rev like
XLOC_017395	XP_023897208.1UDP-glycosyltransferase 13-like
XLOC_017434	AZL19538.1transcription factor GLK2
XLOC_017488	PSR89542.1Inactive leucine-rich repeat receptor-like protein kinase precursor
XLOC_017603	PSS24596.1Protein IQ-DOMAIN like
XLOC_017803	PSS32610.1Lipid-A-disaccharide synthase
XLOC_017838	PSS13792.1E3 ubiquitin-protein like
XLOC_017925	PSS32317.1Paramyosin like
XLOC_017993	PSS00149.17-deoxyloganetin glucosyltransferase
XLOC_018127	PSR91577.1Lipid transfer protein EARLI 1 like
XLOC_018170	XP_008375185.1 putative disease resistance protein RGA3
XLOC_018187	XP_020417187.1probable rhamnogalacturonate lyase B
XLOC_018204	PSS14475.126S proteasome non-ATPase regulatory subunit 2 A like
XLOC_018242	PSS19184.1Armadillo repeat-containing protein
XLOC_018270	PSS08410.1Receptor kinase-like protein Xa21, processed
XLOC_018306	PSR99872.17-deoxyloganetin glucosyltransferase
XLOC_018310	PSS01865.1Leucine-rich repeat extensin-like protein
XLOC_018311	PSS01865.1Leucine-rich repeat extensin-like protein
XLOC_018381	PSS00437.1Ribonuclease E/G-like protein
XLOC_018553	XP_010264363.1 leucine-rich repeat receptor-like protein kinase TDR isoform X1
XLOC_018606	XP_002273931.1 transcription initiation factor TFIID subunit 9
XLOC_018741	KYP35696.1Enzymatic polyprotein
XLOC_018904	PSS01227.1Homeobox protein
XLOC_018989	---NA---
XLOC_019009	EOY31735.1Transferring glycosyl groups
XLOC_019089	AJO70152.1disproportionating enzyme 2
XLOC_019112	XP_008374730.1 alpha-galactosidase 3-like
XLOC_019129	PSR99693.1Lipoyltransferase-like protein
XLOC_019215	PSR87882.1ATP-dependent 6-phosphofructokinase
XLOC_019220	XP_010260148.1 pentatricopeptide repeat-containing protein At5g02830, chloroplastic isoform X1
XLOC_019421	PSS33158.1Heterogeneous nuclear ribonucleoprotein like
XLOC_019458	XP_010648589.1 protein DDB_G0276689 isoform X2
XLOC_019478	---NA---
XLOC_019525	XP_012853557.1 ras-related protein RABC1
XLOC_019533	PSS08231.1Glutamate receptor 3.2 like
XLOC_019574	PSS31523.1Heat shock protein
XLOC_019621	PON83288.1Formin, FH2 domain containing protein
XLOC_019630	PSR98720.1Serine/threonine-protein phosphatase 6 regulatory subunit like
XLOC_019673	PSS00151.1Receptor-like protein kinase
XLOC_019715	---NA---
XLOC_019740	XP_003631469.1 disease resistance protein RPM1
XLOC_019763	PSS19355.1Pentatricopeptide repeat-containing protein
XLOC_019861	XP_011095576.1serine/threonine-protein phosphatase 7 long form homolog isoform X1
XLOC_019926	KDP43858.1hypothetical protein JCGZ_20868
XLOC_020022	XP_021887647.1ACT domain-containing protein ACR9-like
XLOC_020033	GAV76008.1DUF1517 domain-containing protein
XLOC_020052	PSS04575.1Chaperone protein like
XLOC_020154	PSS05685.1Frizzled and smoothened-like protein
XLOC_020260	PSR99914.1Exocyst complex component EXO70A1 like
XLOC_020279	PSR95455.1EF-Hand 1, calcium-binding site protein
XLOC_020361	XP_018825162.1 heme-binding protein 2-like
XLOC_020479	XP_022768064.1UDP-sugar pyrophosphorylase-like isoform X1
XLOC_020490	PSR86018.1ATP-dependent RNA helicase
XLOC_020537	---NA---
XLOC_020542	PKU60988.1RNA-directed DNA polymerase
XLOC_020621	XP_018826215.1PREDICTED: uncharacterized protein LOC108995167
XLOC_020632	AQL08720.1Retrovirus-related Pol polyprotein LINE-1
XLOC_020663	XP_023923916.1vinorine synthase-like
XLOC_020708	PSS33906.1Mediator of RNA polymerase II transcription subunit 33A like
XLOC_020740	XP_019199932.1 formin-like protein 20 isoform X1
XLOC_020873	RVW79120.1Retrovirus-related Pol polyprotein from transposon RE1
XLOC_020886	---NA---
XLOC_020921	XP_024463698.1protein NRT1/ PTR FAMILY 8.1
XLOC_021017	PSS21704.1Legume lectin domain protein
XLOC_021077	PSS30305.1BRO1 domain-containing protein
XLOC_021187	XP_010661562.1 homeobox-leucine zipper protein ANTHOCYANINLESS 2 isoform X2
XLOC_021256	PSS28560.1Pectate lyase
XLOC_021268	PSS24340.1SPX domain-containing membrane protein
XLOC_021277	XP_002272965.1 subtilisin-like protease SBT1.1
XLOC_021379	PSS28982.1ABC transporter B family member 9 like
XLOC_021600	PSS07276.1Transcription factor hamlet like
XLOC_021634	PSS01743.1Ferredoxin-dependent glutamate synthase
XLOC_021651	PSS04552.1Heat stress transcription factor A-1 like
XLOC_021664	PSS07286.1Subtilisin-like protease
XLOC_021666	XP_023895630.1cytochrome P450 98A2
XLOC_021714	XP_011095869.1glucuronoxylan 4-O-methyltransferase 1-like
XLOC_021759	---NA---
XLOC_021771	PSS11964.1Vacuolar protein sorting-associated protein
XLOC_021845	XP_023886424.1xanthohumol 4'-O-methyltransferase-like
XLOC_021909	PSS02626.1Microtubule-associated protein
XLOC_021918	XP_010031356.1 pyruvate kinase, cytosolic isozyme
XLOC_021935	XP_010262867.1 phenylalanine ammonia-lyase
XLOC_022017	PSS24057.1inactive leucine-rich repeat receptor-like protein kinase
XLOC_022219	PSS23647.1ABC transporter B family member 1 like
XLOC_022222	XP_019186913.1 auxin transporter-like protein 2
XLOC_022556	PSS21372.1Leucine-rich repeat receptor-like protein kinase
XLOC_022592	---NA---
XLOC_022654	RVX21175.1Long chain base biosynthesis protein 1
XLOC_022782	---NA---
XLOC_022806	XP_024929179.1formin-like protein 20 isoform X1
XLOC_022862	XP_021300940.1methylesterase 10-like
XLOC_022867	PSS30772.1Geraniol 8-hydroxylase
XLOC_022923	XP_022868965.1disease resistance protein RPP13-like
XLOC_022927	---NA---
XLOC_022943	XP_002264923.1 protein LNK1
XLOC_023179	PSR96380.1Cobyrinate a,c-diamide synthase
XLOC_023249	XP_022868965.1disease resistance protein RPP13-like
XLOC_023256	---NA---
XLOC_023263	XP_007011870.2 ethylene-responsive transcription factor SHINE 2
XLOC_023754	PSS28864.1Nicotianamine synthase
XLOC_023765	---NA---
XLOC_023797	PHT60200.1Clustered mitochondria protein
XLOC_023861	XP_023923518.1187-kDa microtubule-associated protein AIR9 isoform X2
XLOC_023872	XP_021890026.1nuclear transcription factor Y subunit B-3-like
XLOC_023916	---NA---
XLOC_023956	CBL94163.1putative RNA-directed DNA polymerase (Reverse transcriptase)
XLOC_024024	---NA---
XLOC_024115	APU53711.1MYB transcription factor protein 1
XLOC_024132	KHG09017.1 Chaperone htpG
XLOC_024175	XP_008389928.1 somatic embryogenesis receptor kinase 1-like isoform X2
XLOC_024291	PSS04384.1Scarecrow-like protein
XLOC_024369	PSR98288.1Pyrimidine 5-nucleotidase protein
XLOC_024383	PSS01459.1Heavy metal-associated isoprenylated plant protein
XLOC_024408	PSR96150.1Leucine-rich repeat receptor-like protein kinase
XLOC_024424	PSS36113.1Receptor-like protein kinase
XLOC_024550	AJB84622.1lycopene beta cyclase
XLOC_024698	PSS35656.1BRCA1-A complex subunit BRE like
XLOC_024727	PSS04595.1Phosphoglycerate kinase
XLOC_024772	RVW90360.1Transposon Tf2-12 polyprotein
XLOC_024802	XP_021814710.1receptor expression-enhancing protein 3-like isoform X1
XLOC_024921	PIN00218.1Apoptotic ATPase
XLOC_025000	AOR05814.1mannosidase 1
XLOC_025004	PSR99668.1Sterile alpha motif domain-containing protein
XLOC_025038	PSS28516.1Glutamate--glyoxylate aminotransferase
XLOC_025298	EOY21283.1 FKBP-type peptidyl-prolyl cis-trans isomerase 5 isoform 1
XLOC_025483	PSS30635.1Glycine-rich domain-containing protein
XLOC_025503	---NA---
XLOC_025589	APR63877.1phenylalanine ammonia-lyase 4
XLOC_025701	XP_021616477.1protein CHLOROPLAST IMPORT APPARATUS 2-like
XLOC_025928	KRY07909.1Retrovirus-related Pol polyprotein from type-1 retrotransposable element
XLOC_025940	PSS33681.1CGMP-specific 3',5'-cyclic phosphodiesterase
XLOC_026059	XP_009619160.1 auxin transporter-like protein 4
XLOC_026088	XP_016647234.1 retrovirus-related Pol polyprotein from transposon TNT 1-94
XLOC_026125	PSS26372.1Expansin-B2 like
XLOC_026201	PSS11119.1Tensin-1 like
XLOC_026314	OEL12782.1Peroxisome biogenesis protein 22
XLOC_026486	XP_010243625.1 myosin-6-like
XLOC_026555	PSR85390.130S ribosomal protein
XLOC_026563	PSS26238.1Two-component response regulator-like
XLOC_026566	PSR84792.1Thimet oligopeptidase
XLOC_026714	PSS32261.1Pentatricopeptide repeat-containing protein
XLOC_026893	XP_010656371.1 dnaJ homolog subfamily C GRV2 isoform X2
XLOC_026931	GAV67850.1Methyltransf_29 domain-containing protein
XLOC_026977	---NA---
XLOC_027186	AML76450.1putative LOV domain-containing protein
XLOC_027228	XP_015874289.1uncharacterized protein LOC107411258
XLOC_027330	XP_011027643.1PREDICTED: uncharacterized protein LOC105127877
XLOC_027444	---NA---
XLOC_027493	PWA55517.1reverse transcriptase zinc-binding domain-containing protein
XLOC_027500	PSS17443.1Protein GIGANTEA like
XLOC_027638	PSR85267.1PHD finger protein
XLOC_027830	PSR99937.1Transcription repressor like
XLOC_028075	PSR98865.1Protein of unknown function DUF1997 protein
XLOC_028087	---NA---
XLOC_028239	PSS32296.1Molybdate-anion transporter like
XLOC_028245	PSS31636.1Signal peptidase complex-like protein
XLOC_028293	XP_010048551.1 sodium transporter HKT1
XLOC_028299	PSS35927.1Pentatricopeptide repeat-containing protein
XLOC_028810	KYP67484.1Retrovirus-related Pol polyprotein from transposon TNT 1-94
XLOC_028859	PSS33823.1Toll-like receptor 7
XLOC_029059	PSS34787.1LRR receptor-like serine/threonine-protein kinase
XLOC_029209	PSS09806.1MLO-like protein
XLOC_029292	PSS05018.1U11/U12 small nuclear ribonucleoprotein
XLOC_029365	XP_010060485.1 probable serine/threonine-protein kinase abkC
XLOC_029397	PSS31754.1Thioredoxin M-type Md like
XLOC_029407	PSS00151.1Receptor-like protein kinase
XLOC_029415	RVW81457.1Kinesin-like protein KIN-7K, chloroplastic
XLOC_029496	XP_010648366.1 probable protein phosphatase 2C 53
XLOC_029627	PSS08014.1ATP-dependent helicase
XLOC_029629	XP_021606243.1probable xyloglucan endotransglucosylase/hydrolase protein 26
XLOC_029651	PSS04585.1Origin of replication complex subunit like
XLOC_029750	---NA---
XLOC_029916	PSS14057.1MDIS1-interacting receptor like kinase
XLOC_029936	PIN07424.1hypothetical protein CDL12_20011
XLOC_029967	XP_024036973.1LOW QUALITY PROTEIN: uncharacterized protein LOC112096958
XLOC_029971	PSR85028.1CRM-domain containing factor like
XLOC_030011	XP_010647268.1 protein MOR1 isoform X1
XLOC_030113	PSR86437.1Berberine bridge enzyme-like
XLOC_030217	PWZ26506.1Craniofacial development protein 2
XLOC_030419	XP_011091074.1UPF0481 protein At3g47200-like
XLOC_030512	RVW38886.1Retrovirus-related Pol polyprotein from transposon TNT 1-94
XLOC_030523	RVW11905.1Transposon Tf2-2 polyprotein
XLOC_030547	PSS08243.1NmrA-like protein
XLOC_030566	XP_024046747.1beta-galactosidase 8
XLOC_030605	PSS09924.1Disease resistance RPP13-like protein
XLOC_030691	XP_027169107.1omega-hydroxypalmitate O-feruloyl transferase-like
XLOC_030715	PSR86560.1Translation initiation factor IF-2 like
XLOC_030742	XP_010648221.1 tRNA(adenine(34)) deaminase, chloroplastic
XLOC_030755	PSS11349.1Cation/H(+) antiporter like
XLOC_030830	PSR87933.1Ribonuclease III domain-containing protein
XLOC_030859	XP_002528105.1chlorophyll a-b binding protein CP29.1, chloroplastic
XLOC_031012	AIL29215.1aldehyde dehydrogenase
XLOC_031084	---NA---
XLOC_031096	XP_023875393.1pentatricopeptide repeat-containing protein At4g01030, mitochondrial
XLOC_031225	PSS01882.1Lycopene epsilon cyclase
XLOC_031252	EOX94870.1DNAse I-like superfamily protein
XLOC_031275	PSS04784.1Callose synthase
XLOC_031301	PSS31419.1Calcium-binding protein CML10
XLOC_031316	PSS02791.1Beta carbonic anhydrase
XLOC_031420	PSS16088.1Chaperone protein like
XLOC_031441	---NA---
XLOC_031505	PSS00118.1Zinc finger CCCH domain-containing protein
XLOC_031552	PSS26161.1A-agglutinin anchorage subunit like
XLOC_031736	XP_002266139.1 WAT1-related protein At5g40240
XLOC_031742	XP_022722122.1LRR receptor-like serine/threonine-protein kinase GSO2
XLOC_031804	---NA---
XLOC_031805	---NA---
XLOC_031897	---NA---
XLOC_031912	PSS08186.14-coumarate--CoA ligase
XLOC_031948	RVW17265.1leucine-rich repeat receptor-like protein kinase
XLOC_032084	RWR83310.1hypothetical protein CKAN_01206300
XLOC_032198	XP_010277890.1 putative cyclin-D6-1
XLOC_032221	XP_022759596.1ATP synthase delta chain, chloroplastic-like
XLOC_032353	AEJ72569.1putative reverse transcriptase family member
XLOC_032387	PSS24526.1TMV resistance protein like
XLOC_032557	---NA---
XLOC_032565	PSS30793.1Protein moonraker like
XLOC_032681	PSR89508.14-coumarate--CoA ligase-like
XLOC_032691	PSR95930.1adenylate kinase
XLOC_032717	PSS34707.1Nudix hydrolase
XLOC_032742	PSS02923.14-hydroxy-7-methoxy-3-oxo-3,4-dihydro-2H-1, 4-benzoxazin-2-yl glucoside beta-D-glucosidase
XLOC_032847	PSR85374.12-hydroxyisoflavanone dehydratase
XLOC_032898	XP_021672654.1GATA transcription factor 5-like
XLOC_032991	PSS26726.1Serine/threonine-protein kinase
XLOC_033040	XP_006492865.1late embryogenesis abundant protein 46-like
XLOC_033097	NP_001314019.1chlorophyll a-b binding protein of LHCII type 1-like
XLOC_033250	PSR91183.1Monocarboxylate transporter 6 like
XLOC_033352	AZL56929.1auxin-responsive factor
XLOC_033503	PSS30527.1Rapid alkalinization factor like
XLOC_033572	PSS24364.1Nuclear protein localization protein
XLOC_033581	XP_022764736.1aspartyl protease AED3-like
XLOC_033610	PSS32970.1Metal-nicotianamine transporter like
XLOC_033783	PSS26057.1Polyol transporter like
XLOC_033790	---NA---
XLOC_033826	PSS23891.1Reverse transcriptase/Ribonuclease
XLOC_033997	XP_023890823.1IRK-interacting protein
XLOC_034125	---NA---
XLOC_034541	PSS33903.1Adenylate isopentenyltransferase
XLOC_034575	PSS26864.1Polygalacturonase-1 non-catalytic subunit beta like
XLOC_034652	XP_015570769.1hydroxyproline O-arabinosyltransferase 3 isoform X2
XLOC_034710	OMO53722.1Zinc finger, RING-type
XLOC_034771	PSS02626.1Microtubule-associated protein
XLOC_035063	XP_022005875.1ubiquitin carboxyl-terminal hydrolase 12-like
XLOC_035158	PSR89416.1ADP-ribosylation factor GTPase-activating protein
XLOC_035186	---NA---
XLOC_035280	XP_027080659.1G-type lectin S-receptor-like serine/threonine-protein kinase CES101
XLOC_035289	XP_016727828.1 leucine-rich repeat receptor-like protein CLAVATA2 isoform X1
XLOC_035293	PSS21019.1LRR receptor-like serine/threonine-protein kinase
XLOC_035385	PSS19778.1Histone deacetylase complex subunit like
XLOC_035386	---NA---
XLOC_035533	PSS13991.1Gibberellin 20 oxidase
XLOC_035644	PSS19093.1Acyltransferase-like protein
XLOC_035817	PSR84975.1Protein of unknown function DUF1262 protein
XLOC_035910	XP_006439494.1homeobox protein BEL1 homolog isoform X1
XLOC_035941	PSS19184.1Armadillo repeat-containing protein
XLOC_035964	PSS29973.1Amino acid transporter like
XLOC_035965	XP_023886352.1cytochrome P450 71A3-like
XLOC_036015	PSR96683.1Nucleobase-ascorbate transporter like
XLOC_036092	PSS19841.1Thioredoxin-like protein
XLOC_036328	PSS02626.1Microtubule-associated protein
XLOC_036340	RVX01687.1Retrovirus-related Pol polyprotein from transposon RE1
XLOC_036426	PSR99604.1Filament-like plant protein
XLOC_036610	AAI29241.1Zgc:158463 protein
XLOC_036723	PSS35972.1NF-X1-type zinc finger protein
XLOC_036832	PSR98171.1Serine/threonine-protein kinase
XLOC_036842	XP_022926121.1CASP-like protein 5A2
XLOC_036879	XP_018841185.1 RING-H2 finger protein ATL74-like
XLOC_036948	PSR89717.1CLIP-associated protein
XLOC_036970	XP_027070849.1cysteine-rich receptor-like protein kinase 10
XLOC_037202	PSS06452.1ABC transporter C family member 13 like
XLOC_037204	XP_010275512.1 K(+) efflux antiporter 3, chloroplastic
XLOC_037210	PSS11601.1Poly(U)-specific endoribonuclease-B like
XLOC_037220	PSS21016.1UPF0481 protein
XLOC_037240	XP_027166472.1BURP domain-containing protein 16-like
XLOC_037242	XP_027118644.1polygalacturonase non-catalytic subunit AroGP2-like
XLOC_037280	---NA---
XLOC_037281	PSS36482.1DNA-3-methyladenine glycosylase
XLOC_037312	---NA---
XLOC_037510	---NA---
XLOC_037511	---NA---
XLOC_037515	PSR92937.1Auxin efflux carrier component like
XLOC_037591	XP_023929688.1protein RICE SALT SENSITIVE 3
XLOC_037606	PSS26216.1Protein like
XLOC_037629	---NA---
XLOC_037651	XP_011626778.1mediator of RNA polymerase II transcription subunit 6
XLOC_037711	XP_016571353.1 probable LRR receptor-like serine/threonine-protein kinase At3g47570
XLOC_037713	XP_009799744.1 probable LRR receptor-like serine/threonine-protein kinase At3g47570 isoform X1
XLOC_037748	PSR92523.1Altered inheritance of mitochondria protein
XLOC_037749	PSS36344.1Magnesium-chelatase subunit ChlH like
XLOC_037936	PSS03061.1DnaJ subfamily B member like
XLOC_037978	PSR84576.1Photosynthetic NDH subunit of subcomplex B 2 like
XLOC_038051	RVX05674.1Pentatricopeptide repeat-containing protein, chloroplastic
XLOC_038111	EFN65035.1hypothetical protein EAG_01178
XLOC_038187	PSR89212.1Aluminum-activated malate transporter like
XLOC_038241	PSS09621.1Disease resistance protein
XLOC_038347	---NA---
XLOC_038559	PSS28957.1UspA protein
XLOC_038579	KYP37955.1Retrovirus-related Pol polyprotein from transposon TNT 1-94
XLOC_038860	PSS33374.1Photosynthetic NDH subunit of lumenal location 1 like
XLOC_038867	PSR94687.1Transmembrane protein like
XLOC_038913	PSR99766.1Photosystem I chlorophyll a/b-binding protein like
XLOC_038917	PSS31426.1Methyltransferase PMT5
XLOC_039088	XP_018812563.1PREDICTED: uncharacterized protein LOC108984919
XLOC_039250	PSR91075.1Sulfate transporter 3.3 like
XLOC_039337	PSS21314.1CBS domain-containing protein
XLOC_039371	PSR98767.1D-alanine aminotransferase
XLOC_039594	PSS19682.1Oligopeptide transporter like
XLOC_039801	---NA---
XLOC_039814	PIN17704.1Mitochondrial GTPase
XLOC_039879	PSS26898.1Suppressor protein
XLOC_040025	XP_010648914.1 ankyrin repeat-containing protein NPR4-like isoform X1
XLOC_040066	---NA---
XLOC_040130	PSS11662.1Zinc finger protein like
XLOC_040166	PSS30604.1Protein DETOXIFICATION like
XLOC_040309	---NA---
XLOC_040440	---NA---
XLOC_040457	XP_024990375.1photosynthetic NDH subunit of lumenal location 2, chloroplastic
XLOC_040604	PON65005.1Major facilitator
XLOC_040668	XP_024449806.1RNA-binding protein 38 isoform X2
XLOC_040747	PSR85272.1Transcription initiation factor TFIID subunit like
XLOC_040873	PSR93145.1Protein NRT1/ PTR FAMILY 5.6 like
XLOC_040893	GAV89437.1gag_pre-integrs domain-containing protein/UBN2_3 domain-containing protein
XLOC_041036	XP_010653375.1 glucan endo-1,3-beta-glucosidase 3 isoform X1
XLOC_041122	---NA---
XLOC_041248	RVW81951.1putative arabinosyltransferase ARAD1
XLOC_041331	PSS28602.1Squamosa promoter-binding-like protein
XLOC_041334	---NA---
XLOC_041345	PSS10375.15'-adenylylsulfate reductase like
XLOC_041513	XP_027095360.1anthocyanidin 3-O-glucosyltransferase 2-like
XLOC_041683	---NA---
XLOC_041709	PSS13776.1Kinesin-like protein
XLOC_041807	XP_012088784.1protein LUTEIN DEFICIENT 5, chloroplastic isoform X4
XLOC_041839	PSR91047.1Cysteine-rich repeat secretory protein like
XLOC_041853	XP_002274405.2PREDICTED: uncharacterized protein LOC100246569 isoform X1
XLOC_042100	PHU17987.1Potassium channel GORK
XLOC_042132	XP_002270750.3 probable WRKY transcription factor 65
XLOC_042167	PSR91574.1Adenine phosphoribosyltransferase
XLOC_042168	---NA---
XLOC_042260	PSS08234.1Protein EXORDIUM-like
XLOC_042402	AGO05993.1bZIP transcription factor family protein 9
XLOC_042480	---NA---
XLOC_042559	PSR93357.1Protein EXORDIUM-like
XLOC_042682	PSS09962.1Methyltransferase-like protein
XLOC_042724	XP_019199932.1 formin-like protein 20 isoform X1
XLOC_042769	XP_002265088.1 UDP-glucuronate 4-epimerase 6
XLOC_042832	XP_006477962.2receptor-like protein 7
XLOC_042845	---NA---
XLOC_042872	PSR98666.1Cell wall integrity and stress response component 4 like
XLOC_042938	XP_023894877.1receptor-like serine/threonine-protein kinase SD1-8
XLOC_042942	XP_003590996.1GRF1-interacting factor 1
XLOC_043035	PSS00149.17-deoxyloganetin glucosyltransferase
XLOC_043104	XP_023875793.1protein trichome birefringence-like 34
XLOC_043173	RVW23686.1Retrovirus-related Pol polyprotein from transposon TNT 1-94
XLOC_043197	PSS29433.1Glycine-rich RNA-binding protein
XLOC_043216	EOX91143.1RNA-binding family protein isoform 1
XLOC_043223	XP_007204325.1protein indeterminate-domain 2
XLOC_043235	XP_018499704.1 probable LRR receptor-like serine/threonine-protein kinase At3g47570
XLOC_043254	---NA---
XLOC_043302	PSR94693.1Phytoene synthase
XLOC_043391	PSS02916.1Non-lysosomal glucosylceramidase
XLOC_043392	XP_018726034.1 TMV resistance protein N-like
XLOC_043425	---NA---
XLOC_043523	PSR87878.1Leucine-rich repeat receptor-like serine/threonine-protein kinase
XLOC_043573	---NA---
XLOC_043779	PSS11895.1Protein RESPONSE TO LOW SULFUR like
XLOC_043860	XP_023737664.1nitrate regulatory gene2 protein-like
XLOC_043867	PSS24699.1Lysine-specific demethylase
XLOC_043921	---NA---
XLOC_043948	---NA---
XLOC_043951	XP_022026250.1protein RADIALIS-like 3
XLOC_044059	XP_017618969.1 hevamine-A-like
XLOC_044087	PSR96553.1Zinc finger protein like
XLOC_044126	RVW35772.1Protein FAR1-related sequence 5
XLOC_044184	PSS04956.1Cationic amino acid transporter like
XLOC_044499	---NA---
XLOC_044684	PSS30060.1PHD finger protein MALE MEIOCYTE DEATH like
XLOC_044755	PSS04027.1Pentatricopeptide repeat-containing protein
XLOC_044758	PSR99958.1Receptor-like protein kinase
XLOC_044766	XP_008224939.1 B3 domain-containing protein Os07g0563300
XLOC_044796	PON51595.1ABC transporter
XLOC_044817	XP_015876424.1L10-interacting MYB domain-containing protein-like
XLOC_044831	XP_018824334.1 granule-bound starch synthase 1, chloroplastic/amyloplastic-like isoform X1
XLOC_044843	---NA---
XLOC_044845	EOY33469.1WIP domain protein 3
XLOC_044893	PSS28915.1Pentatricopeptide repeat-containing protein
XLOC_045015	XP_006446950.1secoisolariciresinol dehydrogenase
XLOC_045242	---NA---
XLOC_045252	PSS04991.1Transcription initiation factor TFIID subunit like
XLOC_045266	PSS19549.1Biotin carboxylase
XLOC_045354	---NA---
XLOC_045378	XP_002278642.1 dof zinc finger protein DOF3.6 isoform X1
XLOC_045391	---NA---
XLOC_045480	---NA---
XLOC_045557	PSS26602.1Polyketide cyclase
XLOC_045722	PSS00363.1Nijmegen breakage syndrome 1 protein
XLOC_045803	PSS15997.1Wall-associated receptor kinase-like
XLOC_045865	PSS33479.1Protein like
XLOC_045963	PSS10337.1Translation initiation factor eIF-2B subunit delta like
XLOC_046000	---NA---
XLOC_046099	---NA---
XLOC_046166	---NA---
XLOC_046194	XP_012470239.1 photosystem I reaction center subunit N, chloroplastic-like
XLOC_046336	XP_023923518.1187-kDa microtubule-associated protein AIR9 isoform X2
XLOC_046339	RVW84538.1Retrovirus-related Pol polyprotein from transposon TNT 1-94
XLOC_046498	PSR91519.1Transcriptional regulator SLK2
XLOC_046589	PWZ53585.140S ribosomal protein S3a
XLOC_046598	PSS24061.1Protein TonB like
XLOC_046728	XP_010656409.1 zinc finger CCCH domain-containing protein 34 isoform X1
XLOC_046743	PSS14615.1Ent-copalyl diphosphate synthase
XLOC_046759	PSS26430.1Cobyrinate a,c-diamide synthase
XLOC_046760	PSS28910.1Berberine bridge enzyme-like
XLOC_046812	XP_002274152.1 HVA22-like protein a
XLOC_046871	XP_022745388.1protein ZINC INDUCED FACILITATOR-LIKE 1-like
XLOC_047081	XP_022768064.1UDP-sugar pyrophosphorylase-like isoform X1
XLOC_047090	PSR86840.1Chromatin structure-remodeling complex protein like
XLOC_047147	PSR99958.1Receptor-like protein kinase
XLOC_047157	XP_021624214.1calmodulin-like protein 11 isoform X2
XLOC_047285	XP_010090165.2flavonoid 3'-monooxygenase
XLOC_047405	---NA---
XLOC_047647	XP_021609576.1ACT domain-containing protein ACR6
XLOC_047658	PSS26956.1Ribosome biogenesis GTPase
XLOC_047678	PSR86593.1Homeobox-leucine zipper protein like
XLOC_047767	XP_006347977.1 uclacyanin-3-like
XLOC_047936	PSR92727.1Serine/threonine-protein kinase
XLOC_047970	---NA---
XLOC_048003	---NA---
XLOC_048084	---NA---
XLOC_048111	PSS29238.1K(+) efflux antiporter 3 like
XLOC_048230	RVW38649.1Retrovirus-related Pol polyprotein from transposon TNT 1-94
XLOC_048265	---NA---
XLOC_048279	XP_012075651.1BTB/POZ domain-containing protein At1g30440 isoform X1
XLOC_048295	XP_023917881.1squamosa promoter-binding-like protein 6
XLOC_048313	PSS35846.1B-box zinc finger protein
XLOC_024287	PSS33260.1Phosphoglucan phosphatase
