# Supplementary material for: Comparing adventitious root-formation and graft-unification abilities in clones of Argania spinosa
Source: Front Plant Sci. 2022 Nov 14;13:1002703. doi: 10.3389/fpls.2022.1002703 (PMC9702570; doi:10.3389/fpls.2022.1002703)
Supplement: Supplementary Table 7 — List of transcripts in the yellow zones in Figure 5 . [file Table_7.xlsx]

## Sheet: a
397 common elements in "ARS7 G 1" and "ARS1 G 4":
XLOC_000233	KYP41064.1Retrovirus-related Pol polyprotein from transposon TNT 1-94
XLOC_000415	PSR91856.1Homeobox protein knotted-1-like
XLOC_000634	XP_010265939.1 homeobox-leucine zipper protein HOX11-like
XLOC_001002	XP_021654508.1BAG-associated GRAM protein 1-like isoform X1
XLOC_001361	PSR92609.1ABC transporter C family member 14 like
XLOC_001446	---NA---
XLOC_001454	PSS17591.1Nucleotide-diphospho-sugar transferase protein
XLOC_001524	PSS20927.1Tetratricopeptide repeat protein
XLOC_001720	PSS28994.1WRKY transcription factor 28
XLOC_001828	PSR93271.1Protein ENHANCED DISEASE RESISTANCE like
XLOC_001878	XP_012072123.1protein TIFY 5A
XLOC_002021	---NA---
XLOC_002142	PSS30710.1DNA damage-binding protein
XLOC_002291	PSS18139.1Ethylene-responsive transcription factor RAP2-12 like
XLOC_002390	PSS00085.1Protein transport protein
XLOC_002989	XP_011098422.1cyclin-dependent protein kinase inhibitor SMR6
XLOC_003146	PSR95304.1Protein lsd90 like
XLOC_003155	XP_019231677.1 protein YLS9
XLOC_003269	PSS15437.1Disks large like
XLOC_003663	XP_021816274.1phosphoglucan, water dikinase, chloroplastic-like
XLOC_003782	PSR89857.1Glucan endo-1,3-beta-glucosidase
XLOC_003801	PSS07269.1Tyrosine-sulfated glycopeptide receptor like
XLOC_003907	RVX16433.1 Basic endochitinase
XLOC_004019	KHG13052.1RING finger and CHY zinc finger domain-containing 1
XLOC_004230	XP_010267445.1 auxin-responsive protein SAUR32-like
XLOC_004288	PSS04998.1Origin recognition complex subunit like
XLOC_004816	XP_002284189.1PREDICTED: uncharacterized protein At1g66480
XLOC_005036	XP_016200200.1omega-6 fatty acid desaturase, chloroplastic isoform X1
XLOC_005085	PSS24204.1Jasmonic acid-amido synthetase
XLOC_005166	---NA---
XLOC_005345	XP_017980412.1 major pollen allergen Ole e 10 isoform X1
XLOC_005454	XP_006420839.1protein DMR6-LIKE OXYGENASE 2
XLOC_005572	XP_021290972.1receptor like protein kinase S.2
XLOC_005596	PSS18111.1Atrial natriuretic peptide receptor 3 like
XLOC_005641	PSR98233.1Ankyrin repeat-containing protein
XLOC_005994	PSS05669.1Acyl-coenzyme A oxidase 3, peroxisomal like
XLOC_006058	PSS30307.1Acyltransferase-like protein
XLOC_006115	PSS15743.1Serine carboxypeptidase-like
XLOC_006328	---NA---
XLOC_006349	PKA47709.1ataxia telangiectasia mutated family protein
XLOC_006395	PSR91785.1Casein kinase 1-like protein
XLOC_006439	XP_019076242.1 glutathione S-transferase U17
XLOC_006712	PSS36503.1Protein HYPER-SENSITIVITY-RELATED like
XLOC_006733	AFP73462.1F-box/kelch protein
XLOC_006767	XP_027158024.1 receptor-like protein kinase HSL1
XLOC_006872	PSS03048.1Protein like
XLOC_006876	PSS03048.1Protein like
XLOC_007005	XP_017257470.1 dirigent protein 1-like
XLOC_007367	PSR96687.1Ubiquitin-conjugating enzyme like
XLOC_007509	PSS21255.1Eukaryotic peptide chain release factor GTP-binding subunit like
XLOC_007582	PSR86185.1Mitogen-activated protein kinase kinase kinase
XLOC_007620	---NA---
XLOC_007626	XP_027162635.1receptor-like cytoplasmic kinase 176
XLOC_007775	PSR93107.1Protein kinase
XLOC_007803	PSS34273.1Lysozyme like
XLOC_007818	---NA---
XLOC_008072	PSR98568.1Serine carboxypeptidase-like
XLOC_008086	PSR98340.1Serine/threonine-protein kinase
XLOC_008131	PSS02838.1Glycine-rich RNA-binding protein like
XLOC_008337	AZL19357.11-aminocyclopropane-1-carboxylate oxidase 7
XLOC_008382	XP_018826772.1 protein SRG1-like
XLOC_008383	XP_006381086.1protein SRG1
XLOC_008406	XP_022941216.14-hydroxyphenylpyruvate dioxygenase
XLOC_008465	XP_022718998.1germin-like protein subfamily 1 member 13
XLOC_008467	XP_022719993.1germin-like protein subfamily 1 member 13
XLOC_008514	XP_012080011.1probable LRR receptor-like serine/threonine-protein kinase At4g26540
XLOC_008611	XP_021618466.1WRKY transcription factor 22
XLOC_008658	PSS30718.1Cytochrome P450 81E8 like
XLOC_008675	PSS32731.1TOM1-like protein
XLOC_008684	---NA---
XLOC_009073	PSS31441.1E3 ubiquitin-protein like
XLOC_009241	PSS16128.1Cellulose synthase-like protein
XLOC_009348	PSR85040.1Protein NRT1/ PTR FAMILY 2.13 like
XLOC_009484	PSR95094.1Pumilio 1 like
XLOC_009774	PSS29031.1LRR receptor-like serine/threonine-protein kinase
XLOC_009901	PSS09668.1Lon protease 2, peroxisomal like
XLOC_009945	XP_027085267.1VAN3-binding protein-like
XLOC_010086	XP_013633433.1 cytosolic sulfotransferase 18-like
XLOC_010314	PSS07991.1HAD-like domain protein
XLOC_010435	PSR85261.1Mediator of RNA polymerase II transcription subunit like
XLOC_010468	XP_006492604.1protein DMR6-LIKE OXYGENASE 2-like
XLOC_010469	PSR91122.1Enhancer of mRNA-decapping protein
XLOC_010582	XP_027363407.1serine/threonine-protein phosphatase PP1-like isoform X1
XLOC_010966	ASR73785.1acyl-CoA oxidase 5
XLOC_011017	PSS29234.1Galectin-3 like
XLOC_011116	XP_017236615.1 protein PMR5-like
XLOC_011171	PSR95899.1High-affinity nitrate transporter 3.1 like
XLOC_011355	PSS01272.1Methanol O-anthraniloyltransferase
XLOC_011409	XP_006429440.1pyruvate decarboxylase 2
XLOC_011460	RVW44040.1Stress-response A/B barrel domain-containing protein UP3
XLOC_011631	PSS02952.1Purine permease
XLOC_011655	ABA95797.1retrotransposon protein, putative, unclassified
XLOC_012061	RVW30126.1Scopoletin glucosyltransferase
XLOC_012314	PSS03021.1Protein trichome birefringence-like
XLOC_012331	PSS05657.1Protein trichome birefringence-like
XLOC_012362	PSS36384.1UPF0307 protein like
XLOC_012616	XP_006429440.1pyruvate decarboxylase 2
XLOC_012687	PSS20880.1Aldehyde dehydrogenase family 2 member like
XLOC_012771	PSS15947.1Cytochrome P450 94C1 like
XLOC_012780	AII19314.1 PLATZ1
XLOC_012861	PSS23854.1Macrophage migration inhibitory factor like
XLOC_013094	NP_001268217.1CBL-interacting protein kinase 04
XLOC_013116	PSS35113.1Transcription factor like
XLOC_013346	---NA---
XLOC_013687	---NA---
XLOC_013718	XP_021638895.1subtilisin-like protease SBT1.4
XLOC_013775	AJO70164.1sucrose transporter 6
XLOC_013790	XP_022843208.1two pore calcium channel protein 1A-like
XLOC_013881	XP_012848738.1 probable LRR receptor-like serine/threonine-protein kinase RFK1 isoform X1
XLOC_013973	PSR93158.17-deoxyloganetic acid glucosyltransferase
XLOC_014069	XP_007219361.1caffeic acid 3-O-methyltransferase
XLOC_014076	PSS36441.1Protein DA1-related like
XLOC_014155	PSR98054.1SEC12-like protein
XLOC_014238	XP_002514230.1NADP-dependent malic enzyme
XLOC_014478	PSS02923.14-hydroxy-7-methoxy-3-oxo-3,4-dihydro-2H-1, 4-benzoxazin-2-yl glucoside beta-D-glucosidase
XLOC_014517	RVX10437.1IAA-amino acid hydrolase ILR1-like 6
XLOC_014823	XP_022735920.1probable inactive purple acid phosphatase 27
XLOC_014879	XP_004238864.1repressor of RNA polymerase III transcription MAF1 homolog
XLOC_015163	PSS33310.1Transcription factor bHLH51 like
XLOC_015164	PSS33310.1Transcription factor bHLH51 like
XLOC_015304	XP_002514739.1thioredoxin-like 1-2, chloroplastic
XLOC_015318	PSR85418.1Calcineurin B-like protein 3
XLOC_015466	PSS16174.1Protein DETOXIFICATION like
XLOC_015691	PSS36444.1Vacuolar amino acid transporter YPQ1
XLOC_015939	---NA---
XLOC_016007	KFK45076.1hypothetical protein AALP_AA1G340200
XLOC_016111	AQK86477.1ubiquitin carrier protein 7
XLOC_016180	XP_021610794.14-hydroxy-3-methylbut-2-en-1-yl diphosphate synthase (ferredoxin), chloroplastic-like
XLOC_016349	PSS11074.1Haloacid dehalogenase-like hydrolase domain-containing protein
XLOC_016408	AUM57505.1anthocyanidin 3-O-glucosyltransferase
XLOC_016442	XP_024022584.1transcription factor BHLH089
XLOC_016608	PSS07433.1NDR1/HIN1-like protein
XLOC_016644	PSS04089.1Homeodomain-interacting protein kinase
XLOC_016748	PSS19857.1Receptor protein kinase
XLOC_017011	XP_010108709.1integrin-linked protein kinase 1
XLOC_017068	PSR91788.1Bark storage protein like
XLOC_017128	PSS01608.1Formin-like protein
XLOC_017294	PSS30066.1Cysteine-rich receptor-like protein kinase
XLOC_017438	PSS14229.1Lectin-receptor kinase
XLOC_017579	PSS21746.1Anti-sigma-I factor RsgI6 like
XLOC_017886	XP_022717468.1late embryogenesis abundant protein At1g64065-like
XLOC_017887	XP_019179430.1 E3 ubiquitin-protein ligase MIEL1
XLOC_017960	PSR91083.1Glycoprotein gp2 precursor
XLOC_017984	PSS30708.1Protein like
XLOC_018120	XP_010053448.1 protein NRT1/ PTR FAMILY 6.3
XLOC_018125	XP_010053448.1 protein NRT1/ PTR FAMILY 6.3
XLOC_018154	PSS24839.1Protein ECERIFERUM like
XLOC_018200	PSS01688.1Cyclic dof factor like
XLOC_018209	XP_018850465.1 scarecrow-like protein 14
XLOC_018224	XP_022722213.1probable LRR receptor-like serine/threonine-protein kinase At4g36180
XLOC_018243	PSS01219.1Late embryogenesis abundant protein, LEA-14 protein
XLOC_018285	XP_002276533.1 acetate/butyrate--CoA ligase AAE7, peroxisomal
XLOC_018430	PSS04460.1Protein DEFECTIVE IN MERISTEM SILENCING like
XLOC_018537	RVW33482.1Ferredoxin-3, chloroplastic
XLOC_018551	XP_009334622.1 NAC transcription factor 56
XLOC_018723	XP_019151160.1 sorting nexin 2B-like
XLOC_018759	PRQ42208.1putative linoleate 9S-lipoxygenase
XLOC_018828	GAV67986.1DUF4228 domain-containing protein
XLOC_018830	AZL56934.1auxin-responsive protein
XLOC_019019	POO00028.1Proton-dependent oligopeptide transporter
XLOC_019108	PSS36032.1LOB domain-containing protein
XLOC_019196	PSR87868.1Von Willebrand factor, type A protein
XLOC_019279	AGG39699.1aquaporin protein AQU21
XLOC_019305	AXO59800.1sucrose non-fermenting-1-related protein kinase 2.4
XLOC_019614	PSR89268.1Extra-large guanine nucleotide-binding protein like
XLOC_019626	RWR75228.1TBC1 domain-containing protein
XLOC_019795	PSS07839.1Titin like
XLOC_019883	RVW30126.1Scopoletin glucosyltransferase
XLOC_019916	PSS31585.1AT-hook motif nuclear-localized protein
XLOC_020093	XP_007051457.2 transcription factor bHLH14
XLOC_020548	PSS31852.1Protein DETOXIFICATION like
XLOC_020733	PSS10317.1G-type lectin S-receptor-like serine/threonine-protein kinase
XLOC_020936	PON42168.143kDa postsynaptic protein
XLOC_021303	XP_021664828.1probable pectinesterase/pectinesterase inhibitor 17
XLOC_021326	XP_013635581.1 phospholipase A(1) DAD1, chloroplastic
XLOC_021327	RVW57747.1Phospholipase A(1) DAD1, chloroplastic
XLOC_021369	XP_002281334.1 alcohol dehydrogenase 1 isoform X2
XLOC_021472	PSS36446.1Elongation of fatty acids protein like
XLOC_021794	XP_002273091.2 O-glucosyltransferase rumi homolog
XLOC_021842	AKJ86992.1flavonoid 3'-hydroxylase 1
XLOC_021915	XP_022727958.1heat stress transcription factor A-2d-like isoform X3
XLOC_022114	ABF60002.1lipoxygenase 2
XLOC_022590	PSS30306.1Acyltransferase-like protein
XLOC_022948	PSS09495.1Omega-3 fatty acid desaturase, endoplasmic reticulum like
XLOC_023276	AFQ39766.1polygalacturonase-inhibiting protein
XLOC_023404	PSR98592.1Dof zinc finger protein like
XLOC_023474	AAF78757.1putative aquaporin TIP3
XLOC_023589	XP_021283476.1universal stress protein A-like protein isoform X2
XLOC_023674	XP_019229276.1 calcineurin B-like protein 10 isoform X1
XLOC_023792	XP_010277179.1 prohibitin-1, mitochondrial
XLOC_023845	XP_007035120.2 glutathione transferase GST 23
XLOC_023948	PSS04325.1Gamma-glutamyl peptidase
XLOC_024063	---NA---
XLOC_024211	PSS30336.1hypothetical protein CEY00_Acc05575
XLOC_024341	PSS09845.1Pair-rule protein like
XLOC_024344	PSS21554.1U-box domain-containing protein
XLOC_024369	PSR98288.1Pyrimidine 5-nucleotidase protein
XLOC_024409	ASR73782.1acyl-CoA oxidase 2
XLOC_024436	---NA---
XLOC_024438	PSR93525.1NAC domain-containing protein
XLOC_024580	XP_019068519.1protein yippee-like isoform X1
XLOC_024796	XP_002283504.2 growth-regulating factor 1
XLOC_024861	PSS11246.1Methionine gamma-lyase
XLOC_024929	XP_010259644.1 respiratory burst oxidase homolog protein B-like
XLOC_024954	---NA---
XLOC_025484	AGG39699.1aquaporin protein AQU21
XLOC_025529	XP_024160137.1protein yippee-like At5g53940 isoform X1
XLOC_025575	---NA---
XLOC_025702	XP_021282213.1polygalacturonase inhibitor-like
XLOC_025703	XP_021282213.1polygalacturonase inhibitor-like
XLOC_025721	EOY23980.1 PLATZ transcription factor family protein isoform 1
XLOC_025837	---NA---
XLOC_025902	XP_021656560.1TOM1-like protein 6 isoform X2
XLOC_026186	XP_015874406.14-hydroxy-3-methylbut-2-en-1-yl diphosphate synthase (ferredoxin), chloroplastic
XLOC_026319	PSS06110.1Mitochondrial pyruvate carrier like
XLOC_026375	PSS01529.1Acetate/butyrate--CoA ligase AAE7, peroxisomal like
XLOC_026788	XP_021907628.1CBL-interacting serine/threonine-protein kinase 12-like
XLOC_027011	XP_022856454.1cytochrome P450 76A1-like
XLOC_027111	---NA---
XLOC_027116	RVX05397.112-oxophytodienoate reductase 3
XLOC_027119	PSS33283.1Terpene cyclase
XLOC_027125	XP_006429440.1pyruvate decarboxylase 2
XLOC_027350	---NA---
XLOC_027397	---NA---
XLOC_027399	---NA---
XLOC_027667	PIN17193.1Molecular chaperone (small heat-shock protein Hsp26/Hsp42)
XLOC_027856	XP_022772285.1RING-H2 finger protein ATL11-like
XLOC_028081	PSS10336.1Transcription factor
XLOC_028252	PSS04483.1Metal-nicotianamine transporter like
XLOC_028540	XP_024981866.1polygalacturonase inhibitor-like
XLOC_028609	PON36340.1Heat shock transcription factor
XLOC_028982	OMO97311.1hypothetical protein COLO4_14695
XLOC_029125	PSS17954.1AP2-associated protein kinase
XLOC_029127	PSS17954.1AP2-associated protein kinase
XLOC_029180	XP_022865653.1LEAF RUST 10 DISEASE-RESISTANCE LOCUS RECEPTOR-LIKE PROTEIN KINASE-like 1.3 isoform X4
XLOC_029559	XP_024036099.1ATP-dependent 6-phosphofructokinase 6
XLOC_029828	XP_022954077.1zinc finger A20 and AN1 domain-containing stress-associated protein 5-like
XLOC_029876	RVX22358.1GTP-binding protein OBGC, chloroplastic
XLOC_029909	XP_010256764.1 protein NRT1/ PTR FAMILY 5.6
XLOC_030220	PSS31464.1Cytochrome P450 81E8 like
XLOC_030369	PSS13736.1Nudix hydrolase
XLOC_030494	PSS07677.1SNF1-related protein kinase regulatory subunit gamma-1 like
XLOC_030589	PSS34340.1Pentatricopeptide repeat-containing protein
XLOC_030630	PSS02795.1Plant intracellular Ras-group-related LRR protein
XLOC_031089	PSS03957.1Trehalose-phosphate phosphatase
XLOC_031151	XP_023877718.1xyloglucan endotransglucosylase/hydrolase 2-like
XLOC_031226	PSS01880.1Polyol transporter like
XLOC_031346	XP_010098855.2protein PELOTA 1
XLOC_031419	XP_021273738.1F-box protein At3g07870-like
XLOC_031424	PSR93237.1Polyadenylate-binding protein-interacting protein
XLOC_031480	---NA---
XLOC_031648	PSS01272.1Methanol O-anthraniloyltransferase
XLOC_031649	PSS01272.1Methanol O-anthraniloyltransferase
XLOC_031922	PSS33643.1Cytochrome P450 85A1 like
XLOC_031992	AXC43360.1terpene synthase 7
XLOC_032266	PSR91155.1Protein transport protein
XLOC_032301	RHN51461.1putative RNA-directed DNA polymerase
XLOC_032614	EOY04003.1 Plastid movement impaired 2
XLOC_032734	PSS29111.1Chloride channel protein like
XLOC_032917	XP_021657755.1protein MIZU-KUSSEI 1-like
XLOC_032957	PSS14005.1Protein DMR6-LIKE OXYGENASE 2 like
XLOC_032983	RVW60246.1Retrovirus-related Pol polyprotein from transposon 297
XLOC_033045	PSR84546.1(-)-alpha-terpineol synthase
XLOC_033057	AIL29212.1malonyl-CoA:ACP transacylase
XLOC_033094	PSS29000.1LRR receptor-like serine/threonine-protein kinase
XLOC_033104	PSS30722.1Transcription factor like
XLOC_033168	PSS10010.1Thaumatin-like protein
XLOC_033245	PSR93139.1Wall-associated receptor kinase-like
XLOC_033278	PSS10006.1LRR receptor-like serine/threonine-protein kinase precursor
XLOC_033443	PSR95124.1CLE46p like
XLOC_033445	XP_009800616.1 osmotin-like protein
XLOC_033786	PSS26057.1Polyol transporter like
XLOC_033994	PSR86855.1ETHYLENE INSENSITIVE 3-like 3 protein
XLOC_034033	XP_002275524.1 auxin-responsive protein SAUR50
XLOC_034074	XP_010272036.1 LIM domain-containing protein WLIM1-like
XLOC_034079	XP_010259075.1 protein MARD1
XLOC_034315	PSS12093.1Zinc finger protein like
XLOC_034504	KYP58728.1Retrovirus-related Pol polyprotein from transposon TNT 1-94
XLOC_034855	XP_018814435.1 transcription factor bHLH128-like
XLOC_034873	XP_019154201.1 caffeic acid 3-O-methyltransferase-like
XLOC_034983	PSS05651.1Riboflavin kinase
XLOC_035135	RVW99947.1Cytochrome P450 81E8
XLOC_035302	---NA---
XLOC_035332	PSS34896.11-aminocyclopropane-1-carboxylate oxidase
XLOC_035356	XP_018846882.1 basic 7S globulin-like
XLOC_035417	PSS30708.1Protein like
XLOC_035448	PSS30336.1hypothetical protein CEY00_Acc05575
XLOC_035453	PSS24394.1TRNA (guanine-N(1)-)-methyltransferase
XLOC_035546	PSR87682.1Granule-bound starch synthase
XLOC_035591	PSS07456.1F-box/kelch-repeat protein
XLOC_035649	PSS00166.1Patellin-5 like
XLOC_036001	---NA---
XLOC_036178	ABF60002.1lipoxygenase 2
XLOC_036265	XP_021686393.11-aminocyclopropane-1-carboxylate oxidase homolog 1-like isoform X1
XLOC_036432	RVW90585.1 Retrovirus-related Pol polyprotein from transposon TNT 1-94
XLOC_036593	PSS16118.1Ethylene-responsive transcription factor 3 like
XLOC_036888	PSS01761.1Triacylglycerol lipase
XLOC_036897	PSS01608.1Formin-like protein
XLOC_037105	---NA---
XLOC_037255	XP_012492838.1 pathogenesis-related protein PR-4-like
XLOC_037502	RVW33482.1Ferredoxin-3, chloroplastic
XLOC_037561	PON89057.1Mono-/di-acylglycerol lipase
XLOC_037884	PSR98477.1Aspartic proteinase-like protein
XLOC_037958	XP_006833223.1heavy metal-associated isoprenylated plant protein 3 isoform X1
XLOC_038019	ABF60002.1lipoxygenase 2
XLOC_038135	XP_004138418.2 transcription factor bHLH51
XLOC_038196	PSS15861.1E3 ubiquitin-protein like
XLOC_038452	AWH62807.1resveratrol O-methyltransferase-like protein
XLOC_038477	PON33146.1MORN motif
XLOC_038678	PSS18175.1Exocyst complex component EXO84B like
XLOC_038874	XP_016668922.1 pathogenesis-related protein PR-4-like
XLOC_038908	PSS11235.12-keto-3-deoxy-L-rhamnonate aldolase
XLOC_039087	---NA---
XLOC_039241	PSS23908.1Protein NRT1/ PTR FAMILY 5.2 like
XLOC_039266	PSS04515.1Legume lectin domain protein
XLOC_039272	PSS32937.1EF-Hand 1, calcium-binding site protein
XLOC_039435	XP_002515949.1acid phosphatase 1 isoform X1
XLOC_039437	PSS18026.1ATP-dependent 6-phosphofructokinase
XLOC_039528	PSS17293.1Acyl-CoA-binding domain-containing protein
XLOC_039659	PSS19575.1Homeobox-leucine zipper protein like
XLOC_039663	XP_010647264.2 probable LRR receptor-like serine/threonine-protein kinase At5g10290
XLOC_039715	PSS10131.1Linoleate 9S-lipoxygenase
XLOC_039964	---NA---
XLOC_040024	---NA---
XLOC_040027	PSS30051.1Tripartite motif-containing protein
XLOC_040123	PSS24137.1Flavin-containing monooxygenase FMO GS-OX-like
XLOC_040160	PSR87848.1Protein PIN-LIKES like
XLOC_040266	XP_002524454.1early nodulin-93
XLOC_040420	XP_010649854.1 endo-1,3;1,4-beta-D-glucanase
XLOC_040564	PSS34685.1Myb family transcription factor
XLOC_040640	XP_011009377.1 transcription factor TCP13-like isoform X2
XLOC_040705	OMO63305.1GH3 auxin-responsive promoter
XLOC_040724	---NA---
XLOC_040779	PSS13573.1Tetratricopeptide repeat protein like
XLOC_041048	PSR93089.1ACT domain-containing protein
XLOC_041371	XP_018844047.1 crocetin glucosyltransferase, chloroplastic-like
XLOC_041486	XP_002269170.1 probable WRKY transcription factor 14
XLOC_041646	PSS01388.1UPF0481 protein
XLOC_042045	EOX91767.1Squalene monooxygenase isoform 1
XLOC_042120	XP_027095390.1cytochrome P450 94A1-like
XLOC_042145	PSS34754.1CBL-interacting serine/threonine-protein kinase
XLOC_042192	---NA---
XLOC_042468	XP_011008369.1 probable prolyl 4-hydroxylase 6
XLOC_042540	PSS32374.1Receptor-like protein kinase
XLOC_042570	PSS07728.1Cytochrome P450 71A1 like
XLOC_043035	PSS00149.17-deoxyloganetin glucosyltransferase
XLOC_043343	XP_012091425.1thioredoxin-like protein CXXS1
XLOC_043478	XP_015866052.2plasma membrane ATPase 4
XLOC_043602	PSS11105.1Ankyrin repeat-containing protein
XLOC_043617	PSR88125.1Nudix hydrolase
XLOC_043618	PSR88122.1Calcium-binding protein
XLOC_043662	XP_027075221.1ethylene-responsive transcription factor ERF056-like
XLOC_043718	XP_021276381.1uncharacterized protein LOC110410822
XLOC_043759	PSS28927.1E3 ubiquitin-protein like
XLOC_044158	AKE33276.11-deoxy-d-xylulose 5-phosphate reductoisomerase
XLOC_044236	PSS05719.1Two pore calcium channel protein like
XLOC_044430	PSS31143.1Diacylglycerol kinase
XLOC_044473	PSS00367.1RING-H2 finger protein
XLOC_044509	PSR88389.1Inactive purple acid phosphatase
XLOC_044641	XP_022748983.1AT-hook motif nuclear-localized protein 20-like
XLOC_044653	PSR93120.1Aspartic proteinase
XLOC_044721	PSS14691.1Lipid-phosphate phosphatase
XLOC_044978	XP_016753568.1 germin-like protein subfamily 1 member 14
XLOC_045043	PSS33389.1Aquaporin PIP2-5 like
XLOC_045110	PSR95290.1LysM domain receptor-like kinase
XLOC_045348	XP_002285015.1 transcription factor MYB44
XLOC_045366	PSS15743.1Serine carboxypeptidase-like
XLOC_045382	PSS33871.1Stem-specific protein
XLOC_045440	PSS21212.1Protein PHLOEM PROTEIN 2-LIKE like
XLOC_045467	PSS35162.1Plant cysteine oxidase
XLOC_045601	PSS28705.1Homeobox-leucine zipper protein
XLOC_045839	AGC39177.1thaumatin-like protein
XLOC_045847	XP_002325976.1proteinase inhibitor type-2
XLOC_046003	XP_002276380.1 ETHYLENE INSENSITIVE 3-like 1 protein
XLOC_046027	PSS32867.1Protein fluG like
XLOC_046059	XP_011017834.1 36.4 kDa proline-rich protein-like
XLOC_046063	PSS13878.1Hydrophobic seed protein
XLOC_046342	XP_011073815.1putative disease resistance protein At1g50180
XLOC_046526	PSS32735.1Aspartate aminotransferase
XLOC_046712	GAV61454.1 DUF2828 domain-containing protein
XLOC_046751	PSR84933.1Protein like
XLOC_046933	PSS32512.1Abscisic acid receptor like
XLOC_047058	XP_011089652.1cytochrome P450 82C2
XLOC_047104	XP_006426798.1alanine aminotransferase 2, mitochondrial
XLOC_047311	XP_002278211.1 trans-resveratrol di-O-methyltransferase
XLOC_047438	PSS14258.1Glucuronoxylan glucuronosyltransferase
XLOC_047484	---NA---
XLOC_047505	PSS07810.1Ankyrin repeat-containing protein
XLOC_047515	XP_023895611.1acyl-CoA--sterol O-acyltransferase 1-like
XLOC_047522	PSS04672.1Acyl-CoA--sterol O-acyltransferase
XLOC_047712	XP_022844378.1E3 ubiquitin-protein ligase ATL59-like
XLOC_047728	PSS07398.1Transcription factor MYB1R1 like
XLOC_047740	XP_018830283.1 acid phosphatase 1-like
XLOC_047849	PSS26055.1BURP domain protein
XLOC_047867	XP_015896868.1abscisic acid receptor PYR1-like
XLOC_047868	ANB66341.1MYC2 trancriptor
XLOC_048222	XP_010093007.1zinc finger protein CONSTANS-LIKE 2

## Sheet: b
749 common elements in "ARS7 G 2" and "ARS 1 G1":
XLOC_000192	XP_009589856.1 S-adenosylmethionine synthase 1
XLOC_000193	XP_009589856.1 S-adenosylmethionine synthase 1
XLOC_000294	PSS28757.1Phosphate transporter like
XLOC_000388	---NA---
XLOC_000423	PSS17284.1E3 ubiquitin-protein like
XLOC_000453	PSR90173.1Large neutral amino acids transporter small subunit like
XLOC_000515	PSS10377.1F-box protein
XLOC_000535	XP_011000749.1 methylecgonone reductase-like
XLOC_000554	PSS35635.1Oxidation resistance protein
XLOC_000586	---NA---
XLOC_000598	XP_020548543.1uncharacterized WD repeat-containing protein C2A9.03 isoform X2
XLOC_000600	XP_013460860.1uncharacterized WD repeat-containing protein C2A9.03 isoform X1
XLOC_000621	---NA---
XLOC_000628	KHN37815.1Protein IDA
XLOC_000718	PSS10079.1Protein NRT1/ PTR FAMILY 7.3 like
XLOC_000784	PSS18085.1Pollen-specific leucine-rich repeat extensin-like protein
XLOC_000990	PSS08367.1Caffeoylshikimate esterase
XLOC_001055	XP_008369618.1 transaldolase-like
XLOC_001115	OMO74455.1Major intrinsic protein
XLOC_001210	---NA---
XLOC_001287	---NA---
XLOC_001578	PSS36730.1ATP-dependent RNA helicase
XLOC_001670	AZQ19316.1WRKY DNA-binding protein 30
XLOC_001695	PSS07800.1U-box domain-containing protein
XLOC_001841	PSS00353.1Subtilisin-like protease
XLOC_001897	PSS04384.1Scarecrow-like protein
XLOC_001998	RVW13862.1Receptor-like serine/threonine-protein kinase SD1-8
XLOC_002077	XP_021807127.1protein phosphatase 2C 56-like
XLOC_002264	XP_027113237.1protein DMP3-like
XLOC_002297	XP_023887714.1GDSL esterase/lipase 1-like
XLOC_002543	PSS15869.1C2 domain-containing protein
XLOC_002549	RWR94899.1ataxia telangiectasia mutated family protein
XLOC_002607	XP_015881704.1uncharacterized protein LOC107417610 isoform X3
XLOC_002632	PSS16134.1LysM domain receptor-like kinase
XLOC_002657	AJF46885.1bHLH transcription factor MYC1
XLOC_002827	XP_011086652.1probable E3 ubiquitin-protein ligase XERICO
XLOC_002849	ALD83478.1cinnamate 4-hydroxylase
XLOC_002850	ALD83478.1cinnamate 4-hydroxylase
XLOC_002852	XP_021607374.1ankyrin repeat domain-containing protein 13C-B-like
XLOC_002895	XP_010656826.1 probable xyloglucan endotransglucosylase/hydrolase protein 23
XLOC_003019	PSS30602.1Protein DETOXIFICATION like
XLOC_003021	PSS30602.1Protein DETOXIFICATION like
XLOC_003116	AFD63133.1senescence-associated protein
XLOC_003119	AFD63133.1senescence-associated protein
XLOC_003188	PSS08335.1BRO1 domain-containing protein
XLOC_003214	PSS04384.1Scarecrow-like protein
XLOC_003266	XP_004243918.1probable flavin-containing monooxygenase 1
XLOC_003275	AXC25340.1sucrose non-fermenting-1-like protein kinase 2.2
XLOC_003305	---NA---
XLOC_003365	---NA---
XLOC_003377	PSS09712.1WAT1-related protein
XLOC_003424	XP_009614938.1 transcription factor bHLH92
XLOC_003448	XP_022727079.1probable beta-D-xylosidase 5 isoform X1
XLOC_003451	XP_018806018.1 probable beta-D-xylosidase 5
XLOC_003601	PSS36661.1U-box domain-containing protein
XLOC_003658	XP_009590797.1 inositol-3-phosphate synthase
XLOC_003783	PSR89856.1Calcium-binding protein
XLOC_003807	XP_002279219.1 auxin transporter-like protein 2 isoform X1
XLOC_003818	PSR95108.1DNA polymerase
XLOC_003887	XP_022868140.1peroxisomal adenine nucleotide carrier 1-like
XLOC_003900	---NA---
XLOC_003921	PSR91814.1Pleiotropic drug resistance protein
XLOC_003922	XP_022864279.1pleiotropic drug resistance protein 1-like
XLOC_003989	PSS30271.1Shikimate kinase
XLOC_004151	ALP43797.1transcription factor MYB10
XLOC_004170	PSS24536.1Disease resistance protein
XLOC_004479	PSR95735.1Phospholipid-transporting ATPase 9
XLOC_004485	PSS01627.1Syntaxin-121 like
XLOC_004500	PSR95735.1Phospholipid-transporting ATPase 9
XLOC_004564	XP_009761175.1 SNAP25 homologous protein SNAP33
XLOC_004572	PSR86642.1Serine/threonine-protein kinase
XLOC_004596	XP_018823263.1 probable mediator of RNA polymerase II transcription subunit 37c
XLOC_004667	---NA---
XLOC_004725	XP_010087594.1ras-related protein RABH1e
XLOC_004884	RVX14359.1Retrovirus-related Pol polyprotein from transposon TNT 1-94
XLOC_004939	PSS30449.1Thioredoxin-like fold protein
XLOC_005046	---NA---
XLOC_005117	XP_021813614.1ethylene-responsive transcription factor 1A
XLOC_005118	XP_021813614.1ethylene-responsive transcription factor 1A
XLOC_005119	XP_022758310.1G-type lectin S-receptor-like serine/threonine-protein kinase LECRK3
XLOC_005120	---NA---
XLOC_005426	PSS24438.1UPF0496 protein
XLOC_005597	PSR96948.1Linoleate 13S-lipoxygenase
XLOC_005615	XP_008384737.1 UDP-glycosyltransferase 87A1-like
XLOC_005680	PSS24591.1Luminal-binding protein like
XLOC_005696	---NA---
XLOC_005729	KVH94628.1Metallothionein, family 15, plant
XLOC_005812	RVW67883.1putative xyloglucan endotransglucosylase/hydrolase protein 23
XLOC_005813	OVA16013.1Glycoside hydrolase
XLOC_005816	RVW25324.1putative xyloglucan endotransglucosylase/hydrolase protein 23
XLOC_005821	---NA---
XLOC_005957	PSR85035.1Protein ENHANCED DISEASE RESISTANCE like
XLOC_005961	PSS28690.1LRR receptor-like serine/threonine-protein kinase
XLOC_005976	AFU07481.1phosphate transporter
XLOC_006035	AGG39692.1ERF transcription factor ERF1
XLOC_006102	OMO74987.1Multi antimicrobial extrusion protein
XLOC_006109	XP_022028055.1phosphatidylinositol 3,4,5-trisphosphate 3-phosphatase and protein-tyrosine-phosphatase PTEN2A-like
XLOC_006118	PSS24526.1TMV resistance protein like
XLOC_006153	---NA---
XLOC_006169	PSS13881.1Heptahelical transmembrane protein
XLOC_006342	PSS17209.1WD40-repeat-containing domain protein
XLOC_006370	AHI54564.1 OleII
XLOC_006374	XP_011078413.1heptahelical transmembrane protein 1
XLOC_006538	PSS07595.1Germin-like protein subfamily 3 member 4
XLOC_006594	XP_023925115.1leucoanthocyanidin reductase-like
XLOC_006596	---NA---
XLOC_006629	---NA---
XLOC_006734	PSR84834.1ATP-citrate synthase alpha chain protein
XLOC_006787	PSS03076.1Cell wall protein
XLOC_006845	---NA---
XLOC_007000	RVW72844.1Retrovirus-related Pol polyprotein from transposon TNT 1-94
XLOC_007018	PSR93082.1Zinc finger protein
XLOC_007028	---NA---
XLOC_007104	XP_006408160.1hevein-like preproprotein
XLOC_007151	PSS11548.1Anthocyanin regulatory C1 protein
XLOC_007191	XP_025806216.1soluble inorganic pyrophosphatase 4 isoform X2
XLOC_007394	PSS29256.1Pyruvate kinase isozyme A like
XLOC_007431	PSR99636.1Purple acid phosphatase
XLOC_007432	PQM38550.1purple acid phosphatase 2
XLOC_007490	EXB67898.1Soluble inorganic pyrophosphatase
XLOC_007579	PSS09499.1Protein like
XLOC_007590	PSR94957.1Transcription factor bHLH78 like
XLOC_007639	PSS26779.1High mobility group nucleosome-binding domain-containing protein
XLOC_007646	---NA---
XLOC_007940	PSS01120.1EEIG1/EHBP1 N-terminal domain protein
XLOC_008003	OVA04688.1Late embryogenesis abundant protein
XLOC_008009	PSS32954.1Regulator of telomere elongation helicase
XLOC_008161	RVX23022.1UDP-glycosyltransferase 87A2
XLOC_008190	PSR99690.1Myosin heavy chain kinase
XLOC_008194	XP_019156211.1 probable galacturonosyltransferase-like 1
XLOC_008222	---NA---
XLOC_008241	XP_021656134.1probable protein phosphatase 2C 8
XLOC_008243	XP_010261579.1 probable protein phosphatase 2C 51
XLOC_008287	PSS11170.1Adenine phosphoribosyltransferase
XLOC_008303	ACB20696.1putative cold-inducible protein
XLOC_008318	PSS30271.1Shikimate kinase
XLOC_008325	XP_012485812.1 uridine nucleosidase 1 isoform X2
XLOC_008429	PSR99799.1WRKY transcription factor
XLOC_008562	XP_007017754.2 auxin-induced protein 6B
XLOC_008563	KZV47633.1adenine phosphoribosyltransferase 2-like
XLOC_008607	PSR89631.1DnaJ subfamily B member 1 like
XLOC_008655	XP_003632240.1 RING-H2 finger protein ATL34-like
XLOC_008740	PSS09499.1Protein like
XLOC_008831	PSR87514.1F-box protein
XLOC_008895	PSR95177.1MLO-like protein
XLOC_008927	XP_015897475.1vesicle transport protein GOT1-like
XLOC_008993	PSS31625.1Protein EXORDIUM like
XLOC_008998	PSS17753.1UPF0182 protein like
XLOC_009100	PSS33359.1Scarecrow-like protein
XLOC_009180	PSS19248.1Protein like
XLOC_009216	PSS34472.1Serine/threonine-protein kinase-like protein
XLOC_009423	PSR87556.1Altered inheritance of mitochondria protein
XLOC_009441	EOY07493.1 Haloacid dehalogenase-like hydrolase (HAD) superfamily protein
XLOC_009521	PSS32375.1Dentin sialoprotein
XLOC_009682	AEA72280.1phenylalanine ammonia-lyase
XLOC_009693	---NA---
XLOC_009714	PSR98045.1Nuclear valosin-containing protein
XLOC_009892	PSS19524.1Choline kinase
XLOC_009967	KYP32675.1Putative calcium-binding protein CML19
XLOC_009981	PSR91414.1WD repeat-containing protein
XLOC_010020	---NA---
XLOC_010084	GAV62626.1AAA domain-containing protein/CDC48_N domain-containing protein/CDC48_2 domain-containing protein
XLOC_010264	PSR87464.1Metal-nicotianamine transporter like
XLOC_010268	PSR98457.1Glutathione reductase
XLOC_010354	---NA---
XLOC_010393	PSS31467.1Cytochrome P450 81F3 like
XLOC_010398	XP_002285105.1 isoflavone 2'-hydroxylase
XLOC_010405	PSS19334.1Ankyrin repeat-containing protein
XLOC_010416	---NA---
XLOC_010462	XP_004152854.1 heat shock 70 kDa protein
XLOC_010528	PSS28797.1WRKY transcription factor
XLOC_010607	AHI54570.1glutathione S-transferase
XLOC_010623	PSR95270.1G-type lectin S-receptor-like serine/threonine-protein kinase
XLOC_010739	---NA---
XLOC_010849	XP_017243620.1 beta-1,3-galactosyltransferase 7-like
XLOC_010921	PSR84509.1Phospholipase D alpha 1 like
XLOC_011008	PSR91085.11-phosphatidylinositol-3-phosphate 5-kinase
XLOC_011029	ALO19894.1UDP-glycosyltransferase 75L14
XLOC_011076	PSR89479.1Cytochrome P450 71A8 like
XLOC_011159	PSS31683.1NAC domain-containing protein
XLOC_011199	XP_027112817.1root phototropism protein 3-like isoform X1
XLOC_011247	XP_022767608.1protein RETICULATA, chloroplastic-like
XLOC_011341	XP_021288449.1precursor of CEP14
XLOC_011422	---NA---
XLOC_011462	PON58877.1Zf-FLZ domain containing protein
XLOC_011537	PSS32283.1Glycerol-3-phosphate O-acyltransferase
XLOC_011563	---NA---
XLOC_011671	XP_027077238.1protein S-acyltransferase 10-like
XLOC_011692	PSS13901.1HSP-interacting protein
XLOC_011833	PSS26237.1NDR1/HIN1-like protein
XLOC_011859	PSS26390.1Palmitoyl-protein like
XLOC_011915	RVW79699.1putative xyloglucan endotransglucosylase/hydrolase protein 23
XLOC_011955	---NA---
XLOC_012005	PSS04455.1Dipeptidyl aminopeptidase
XLOC_012055	PSS23776.1Kinesin-like protein
XLOC_012068	RWR80163.1Retrotransposon gag protein
XLOC_012088	XP_004288353.1 galactinol synthase 2-like
XLOC_012180	PSR89823.1Berberine bridge enzyme-like
XLOC_012390	PSS00243.1Galactinol synthase
XLOC_012438	PSS03959.1WRKY transcription factor 53
XLOC_012439	PSS24207.1Hydroquinone glucosyltransferase
XLOC_012467	AYA60116.1amino acid permease 7
XLOC_012552	PSR88256.1hypothetical protein CEY00_Acc31285
XLOC_012578	PSR99976.1HVA22-like protein
XLOC_012749	XP_015892430.1cysteine protease RD19A
XLOC_012752	---NA---
XLOC_012767	---NA---
XLOC_012832	XP_011022429.1 oligopeptide transporter 7-like
XLOC_012844	PSS30685.1Nuclear envelope pore membrane protein like
XLOC_012850	PSR89264.1Cellulose synthase-like protein
XLOC_012864	AJO70150.1sucrose synthase 3
XLOC_012865	PSS00266.1ALA-interacting subunit like
XLOC_012911	XP_019253003.1 LOB domain-containing protein 1-like
XLOC_013010	PSR90082.1Scarecrow-like protein
XLOC_013055	PSS11714.1K(+) efflux antiporter 1 like
XLOC_013131	XP_022718874.1transcription repressor MYB5-like
XLOC_013198	PSS35250.1Altered inheritance of mitochondria protein
XLOC_013256	XP_022727079.1probable beta-D-xylosidase 5 isoform X1
XLOC_013345	XP_010686499.1 DNA-directed RNA polymerase II subunit RPB2
XLOC_013406	AZL19530.1transcription factor bHLH5
XLOC_013483	PSR85174.1E3 ubiquitin-protein like
XLOC_013546	XP_022762191.1polygalacturonase QRT3-like
XLOC_013549	XP_022762191.1polygalacturonase QRT3-like
XLOC_013738	XP_027062546.1probable WRKY transcription factor 31
XLOC_013771	XP_018845990.1 protein DETOXIFICATION 33-like
XLOC_013811	---NA---
XLOC_013820	PSS30039.1Rhamnogalacturonate lyase
XLOC_013957	XP_010660322.1 caffeic acid 3-O-methyltransferase
XLOC_014045	AFC37246.1anthocyanidin synthase
XLOC_014368	PSS09712.1WAT1-related protein
XLOC_014375	XP_009794987.1 mitochondrial chaperone BCS1-like
XLOC_014526	PSR95607.1Mediator of RNA polymerase II transcription subunit like
XLOC_014572	XP_004299654.1 protein EXORDIUM-like
XLOC_014676	PSR98720.1Serine/threonine-protein phosphatase 6 regulatory subunit like
XLOC_014831	XP_022861037.1cold-regulated 413 plasma membrane protein 2-like
XLOC_014833	XP_022861026.1protein JINGUBANG-like
XLOC_014880	PSS30271.1Shikimate kinase
XLOC_014899	PSS09445.16-methylsalicylic acid synthase
XLOC_014923	PSS09445.16-methylsalicylic acid synthase
XLOC_014948	PSS14158.1Bifunctional bis(5'-adenosyl)-triphosphatase/adenylylsulfatase
XLOC_015103	XP_018844047.1 crocetin glucosyltransferase, chloroplastic-like
XLOC_015142	XP_012082344.1protein CREG1
XLOC_015178	PSR95182.1Pyridoxal 5'-phosphate synthase
XLOC_015274	PSR86811.1Transcription initiation factor IIB like
XLOC_015435	ABI33224.1ACC oxidase
XLOC_015493	PSR84973.1DnaJ subfamily B member like
XLOC_015494	PSR91083.1Glycoprotein gp2 precursor
XLOC_015541	PON65022.1WRKY domain containing protein
XLOC_015579	PSR96757.1Transcription factor SPATULA like
XLOC_015606	AYA73394.1WRKY transcription factor 65
XLOC_015617	PSS15973.1Transcription factor bHLH92 like
XLOC_015670	XP_020533637.1protein O-linked-mannose beta-1,4-N-acetylglucosaminyltransferase 2
XLOC_015858	PSS16146.1Arogenate dehydratase/prephenate dehydratase
XLOC_015865	XP_011089737.1probable polyamine transporter At3g13620
XLOC_015911	---NA---
XLOC_015973	PSR91325.1IQ domain-containing protein
XLOC_015992	PSS26770.1Potassium channel SKOR like
XLOC_016134	---NA---
XLOC_016166	XP_010103551.1glycerol-3-phosphate dehydrogenase SDP6, mitochondrial
XLOC_016214	XP_006429584.1dentin sialophosphoprotein
XLOC_016223	XP_021820235.1phosphatidate phosphatase PAH2
XLOC_016292	AMN88620.1pyruvate kinase
XLOC_016361	PSR96547.1G-type lectin S-receptor-like serine/threonine-protein kinase
XLOC_016376	XP_027173997.1respiratory burst oxidase homolog protein E
XLOC_016544	XP_022854516.1probable beta-D-xylosidase 5
XLOC_016551	PSS08423.1Synaptotagmin-5 like
XLOC_016556	PSS05947.1Protein NRT1/ PTR FAMILY 6.4 like
XLOC_016770	XP_011026286.1 cytochrome P450 78A7-like
XLOC_016832	PSS06095.1Ninja-family protein
XLOC_016833	---NA---
XLOC_016931	XP_024994496.1aspartyl protease family protein 2-like
XLOC_017063	RVW66056.1Exocyst complex component EXO70H1
XLOC_017183	PSR91746.1Glycine dehydrogenase
XLOC_017229	XP_022888772.1cytokinin hydroxylase-like
XLOC_017364	PSR84658.1Alcohol dehydrogenase-like
XLOC_017394	XP_023897208.1UDP-glycosyltransferase 13-like
XLOC_017441	PSR86120.1E3 ubiquitin-protein like
XLOC_017447	PSR96283.1Centrosomal protein
XLOC_017500	PSS32665.1Sugar phosphate/phosphate translocator like
XLOC_017536	XP_006450748.1oleosin 1
XLOC_017562	PSR89740.1MDIS1-interacting receptor like kinase
XLOC_017587	XP_002282146.1 cell division cycle protein 48 homolog
XLOC_017588	PSS11977.1G-type lectin S-receptor-like serine/threonine-protein kinase
XLOC_017691	PSS04089.1Homeodomain-interacting protein kinase
XLOC_017825	XP_022847534.1precursor of CEP14-like
XLOC_017917	PSS05987.1Membrane-associated kinase regulator
XLOC_018042	PSS01035.1WRKY transcription factor
XLOC_018049	XP_018806018.1 probable beta-D-xylosidase 5
XLOC_018052	PSS19111.1Cysteine protease
XLOC_018055	PSS26028.1Cysteine protease
XLOC_018344	PSR92804.1Vacuolar protein sorting-associated protein
XLOC_018382	XP_006425314.1basic endochitinase
XLOC_018458	PSS33095.1Heat stress transcription factor B-2a like
XLOC_018459	XP_007047144.2 salicylic acid-binding protein 2
XLOC_018460	PSS30774.1Salicylic acid-binding protein like
XLOC_018512	PSS32283.1Glycerol-3-phosphate O-acyltransferase
XLOC_018619	PSR86751.1Hydroxymethylglutaryl-CoA lyase
XLOC_018637	XP_012856749.1 protein YIPF1 homolog
XLOC_018638	PSS19649.1Peroxisomal adenine nucleotide carrier 1 like
XLOC_018705	PSS31839.1Leucine-rich repeat receptor-like tyrosine-protein kinase
XLOC_018846	XP_010252310.1 dihydrolipoyl dehydrogenase 1, mitochondrial
XLOC_018858	PSS16151.1Aconitate hydratase
XLOC_018950	---NA---
XLOC_019392	PSS30452.1Plexin-C1 like
XLOC_019444	ASU87426.1flavanone 3'-hydroxylase
XLOC_019447	ASU87426.1flavanone 3'-hydroxylase
XLOC_019480	OMO96467.1Plastocyanin-like protein
XLOC_019505	PSS24769.1Protein DMR6-LIKE OXYGENASE 2 like
XLOC_019596	XP_021678997.1NAC domain-containing protein 100-like
XLOC_019811	---NA---
XLOC_019888	PSR85950.1E3 ubiquitin-protein like
XLOC_019905	PSS09939.1Annexin like
XLOC_019922	XP_015874643.1UDP-glycosyltransferase 87A1-like isoform X1
XLOC_019946	GAV84439.1PRK domain-containing protein
XLOC_019984	PSS15808.1Plant cysteine oxidase
XLOC_020114	XP_011020663.1 CLAVATA3/ESR (CLE)-related protein TDIF-like
XLOC_020199	---NA---
XLOC_020242	PSR99812.1Receptor protein kinase
XLOC_020296	PSS11270.1Soluble inorganic pyrophosphatase
XLOC_020629	XP_010244970.1 LOB domain-containing protein 1-like
XLOC_020645	BAO58432.1flavonoid 3'-hydroxylase
XLOC_020665	PSR95788.1DCTP pyrophosphatase
XLOC_020870	KYP56875.1Retrovirus-related Pol polyprotein LINE-1
XLOC_020903	PON68328.1Beta-glucosidase GBA2-type
XLOC_020956	PSS19649.1Peroxisomal adenine nucleotide carrier 1 like
XLOC_021038	PSS04422.1Inactive receptor kinase
XLOC_021086	BAE71196.1putative hydroxymethylglutaryl-CoA lyase
XLOC_021287	PSR88287.1UV excision repair protein
XLOC_021318	XP_019053917.1 MDIS1-interacting receptor like kinase 2-like
XLOC_021370	PSS28541.1SufE-like protein
XLOC_021534	PSS28541.1SufE-like protein
XLOC_021564	XP_023913363.1bifunctional aspartate aminotransferase and glutamate/aspartate-prephenate aminotransferase-like
XLOC_021590	PSS33868.1Serine/threonine-protein kinase
XLOC_021623	PSS14157.1Calcium uniporter protein
XLOC_021660	---NA---
XLOC_021671	PSR89090.1Vacuolar protein-sorting protein
XLOC_021822	XP_006423594.1DNA-directed RNA polymerase II subunit RPB2
XLOC_021846	AGN70869.1O-methyltransferase OMT2
XLOC_021935	XP_010262867.1 phenylalanine ammonia-lyase
XLOC_021986	PSR87678.1Splicing factor 3B subunit 1 like
XLOC_022226	POO02001.1Transmembrane protein
XLOC_022468	PSS01348.1E3 ubiquitin-protein like
XLOC_022476	PSS11500.1Lipid transfer-like protein
XLOC_022533	XP_027121312.1transcription repressor OFP12-like
XLOC_022572	XP_009366906.1 sugar transport protein 13-like
XLOC_022730	XP_027367180.1 transcription factor RAX2
XLOC_022949	PSS09494.1Zinc finger CCCH domain-containing protein
XLOC_022988	XP_010247897.1 protein STRICTOSIDINE SYNTHASE-LIKE 3-like
XLOC_022989	XP_009366205.1 heat shock 70 kDa protein
XLOC_023063	PSR90927.1DEP domain-containing mTOR-interacting protein
XLOC_023224	BAO58432.1flavonoid 3'-hydroxylase
XLOC_023226	BAO58432.1flavonoid 3'-hydroxylase
XLOC_023291	XP_021276908.1probable glycosyltransferase At5g03795
XLOC_023452	XP_017975213.1 cinnamoyl-CoA reductase 2
XLOC_023465	AGG39692.1ERF transcription factor ERF1
XLOC_023626	XP_024023110.1GTP-binding nuclear protein Ran-3
XLOC_023660	PSS19524.1Choline kinase
XLOC_023727	PSR89463.1Serine/threonine-protein kinase
XLOC_023789	PSS04815.1ABC transporter like
XLOC_023922	AHB32109.1endoglucanase 6-like protein
XLOC_023996	XP_016497882.1 NDR1/HIN1-Like protein 3-like
XLOC_024011	PSS13984.1Phospholipase D beta like
XLOC_024013	GAV61832.1LysM domain-containing protein
XLOC_024026	PSS34597.1Sushi, nidogen and EGF-like domain-containing protein
XLOC_024090	---NA---
XLOC_024132	KHG09017.1 Chaperone htpG
XLOC_024171	---NA---
XLOC_024183	PSS34798.1Calcium-binding protein like
XLOC_024215	AGT37413.2anthocyanin 5-aromatic acyltransferase
XLOC_024286	PSS34418.1Cytochrome c biosynthesis protein
XLOC_024291	PSS04384.1Scarecrow-like protein
XLOC_024293	PSS34418.1Cytochrome c biosynthesis protein
XLOC_024303	PSS29295.1Pathogenesis-related homeodomain protein
XLOC_024470	PSS16221.1Nucleoporin like
XLOC_024527	XP_010251606.1 late embryogenesis abundant protein At1g64065-like
XLOC_024619	RVX06353.1hypothetical protein CK203_023578
XLOC_024649	PSS21095.1Histone-lysine N-methyltransferase
XLOC_024664	XP_019163283.1 protein YLS9
XLOC_024670	XP_023895166.1protein EXORDIUM-like
XLOC_024750	PSS06210.1Disease resistance protein
XLOC_024753	PSS10179.1Transcription termination factor like
XLOC_025131	PSS21691.1Natterin-3 like
XLOC_025194	RVW47394.1hypothetical protein CK203_105895
XLOC_025258	---NA---
XLOC_025483	PSS30635.1Glycine-rich domain-containing protein
XLOC_025589	APR63877.1phenylalanine ammonia-lyase 4
XLOC_025791	PSS35048.1OTU domain-containing protein
XLOC_026018	OMP02348.1DNA-binding WRKY
XLOC_026322	XP_011001167.1PREDICTED: uncharacterized protein LOC105108532
XLOC_026690	---NA---
XLOC_026785	PSR98633.1Oryzain alpha chain like
XLOC_026792	XP_017978965.1 low-temperature-induced cysteine proteinase
XLOC_026797	XP_011085984.1protein DOG1-like 4
XLOC_026967	RVW81169.1hypothetical protein CK203_041119
XLOC_027023	XP_024197617.1desiccation-related protein PCC13-62-like
XLOC_027079	---NA---
XLOC_027175	---NA---
XLOC_027180	AGW45458.1calcium binding protein
XLOC_027193	PSR92700.1Sugar transport protein
XLOC_027606	---NA---
XLOC_027651	---NA---
XLOC_028040	XP_020224665.1pirin-like protein
XLOC_028169	PSS14470.1Zinc finger CCCH domain-containing protein
XLOC_028234	PSS04483.1Metal-nicotianamine transporter like
XLOC_028308	XP_018832047.1 serine/threonine-protein kinase-like protein CCR4
XLOC_028404	PSR95260.1C2 domain-containing protein
XLOC_028419	PSS23857.1CASP-like protein
XLOC_028501	PSR98799.1LRR receptor-like serine/threonine-protein kinase precursor
XLOC_028564	ABQ10201.1cysteine protease Cp3
XLOC_028570	PSS26025.1Carbamoyl-phosphate synthase small chain like
XLOC_028611	PSS23607.1Soluble scavenger receptor cysteine-rich domain-containing protein
XLOC_028614	PSS23607.1Soluble scavenger receptor cysteine-rich domain-containing protein
XLOC_028748	XP_018839908.1 auxin-responsive protein SAUR41-like
XLOC_028831	PSS17884.1DUF724 domain-containing protein
XLOC_029053	PSS34796.1Protein PIN-LIKES like
XLOC_029060	PSS34784.1BTB/POZ domain-containing protein
XLOC_029161	XP_017232180.1 two-component response regulator-like APRR5
XLOC_029235	PSS01376.1Solute carrier family 35 member like
XLOC_029282	PSS08107.1CBL-interacting serine/threonine-protein kinase
XLOC_029283	PSS08107.1CBL-interacting serine/threonine-protein kinase
XLOC_029326	PSS07468.1Metallothiol transferase
XLOC_029421	XP_011019014.1 expansin-A8-like
XLOC_029479	PSR86405.1Aminopyrimidine aminohydrolase
XLOC_029571	EEF38518.1 catalytic, putative
XLOC_029642	PSR88213.1CTP synthase
XLOC_029660	XP_019151292.1 beta-D-glucosyl crocetin beta-1,6-glucosyltransferase-like
XLOC_029969	PSR89063.1Transcription factor BEE like
XLOC_030176	AHL69786.1dehydration-responsive element-binding protein
XLOC_030209	PSS17284.1E3 ubiquitin-protein like
XLOC_030215	PSS19718.1Syntaxin-61 like
XLOC_030250	PSS18984.1Pectin acetylesterase
XLOC_030259	PSS02983.1U-box domain-containing protein
XLOC_030444	XP_023728970.1UDP-arabinopyranose mutase 1-like
XLOC_030591	PSS33117.1Dehydration-responsive element-binding protein like
XLOC_030629	XP_024194520.1LEAF RUST 10 DISEASE-RESISTANCE LOCUS RECEPTOR-LIKE PROTEIN KINASE-like 1.1 isoform X1
XLOC_030673	XP_018827342.1 serine/threonine-protein kinase tricorner isoform X3
XLOC_030687	XP_027108903.1metalloendoproteinase 4-MMP-like
XLOC_030723	PSS04442.1Rust resistance kinase
XLOC_030727	PSS34256.1Rust resistance kinase
XLOC_030745	PSR91224.1Phospholipid-transporting ATPase 9
XLOC_030755	PSS11349.1Cation/H(+) antiporter like
XLOC_030758	PSS11349.1Cation/H(+) antiporter like
XLOC_030783	PSS36181.1E3 ubiquitin-protein like
XLOC_030836	PSR90928.1Clathrin assembly protein
XLOC_030861	XP_012068768.1ATPase 10, plasma membrane-type
XLOC_030941	PSS24559.1Microtubule-associated protein
XLOC_030969	XP_019075130.1 G-type lectin S-receptor-like serine/threonine-protein kinase LECRK3
XLOC_031239	PSS18189.1General transcription factor IIH subunit like
XLOC_031310	XP_011076095.1fructose-bisphosphate aldolase 3, chloroplastic
XLOC_031338	RVW30491.1NAC domain-containing protein 100
XLOC_031358	RWR87036.1DUF3339 domain-containing protein
XLOC_031410	---NA---
XLOC_031411	---NA---
XLOC_031458	XP_015873145.1protein STRICTOSIDINE SYNTHASE-LIKE 3
XLOC_031502	XP_022849813.1ethylene-responsive transcription factor ERF014-like
XLOC_031525	PSS04118.1Protein STAY-GREEN like
XLOC_031567	PSR99750.1Patatin-like protein
XLOC_031589	PSR97921.1Futsch light chain LC(f) like
XLOC_031752	XP_019076516.1 transcription termination factor MTERF15, mitochondrial-like
XLOC_031846	PSR96967.1Ethylene-responsive transcription factor RAP2-12 like
XLOC_031866	XP_012087010.1UDP-galactose/UDP-glucose transporter 2
XLOC_031973	PSS13743.1Aquaporin SIP1-2 like
XLOC_031976	PWA63920.1reverse transcriptase domain-containing protein
XLOC_032047	PSS15444.1Ethylene-responsive transcription factor
XLOC_032051	PSS24487.1GDP-fucose protein O-fucosyltransferase protein
XLOC_032079	BAH89267.1putative leucoanthocyanidin reductase
XLOC_032105	XP_007026536.1 short-chain dehydrogenase reductase 2a
XLOC_032139	PSS19847.1NEP1-interacting protein
XLOC_032183	PSS32461.1Metacaspase-1 like
XLOC_032281	PSR98209.1Glutathione S-transferase
XLOC_032308	PSS31727.1U-box domain-containing protein
XLOC_032405	CBI34376.3unnamed protein product, partial
XLOC_032456	XP_023883997.1ethylene-responsive transcription factor ERF003-like
XLOC_032504	ALO19894.1UDP-glycosyltransferase 75L14
XLOC_032518	PSS10445.1C2 and GRAM domain-containing protein
XLOC_032526	RVW82659.1Beta-1,3-galactosyltransferase GALT1
XLOC_032572	PSS00250.1Cingulin-like protein
XLOC_032782	---NA---
XLOC_032830	---NA---
XLOC_032833	BAJ08043.1dihydroflavonol 4-reductase
XLOC_032834	PSS36490.1Dihydroflavonol 4-reductase
XLOC_032925	PSS35192.1Zinc finger AN1 domain-containing stress-associated protein
XLOC_033125	ARE30654.1vacuolar invertase INV9
XLOC_033228	PSS18206.1TMV resistance protein like
XLOC_033259	PSS15981.1Reticulon-like protein
XLOC_033422	---NA---
XLOC_033430	PSS24692.1F-box protein
XLOC_033450	XP_002283532.2 heat shock cognate 70 kDa protein 2
XLOC_033611	XP_009589243.1 probable 6-phosphogluconolactonase 4, chloroplastic isoform X2
XLOC_033637	PSR92509.1Receptor-like protein kinase
XLOC_033698	PSS24269.1Mitogen-activated protein kinase
XLOC_033761	XP_002277074.1 transcription factor TCP13
XLOC_033889	XP_012474814.1 B2 protein-like
XLOC_033978	AES63827.2 transmembrane protein, putative
XLOC_034078	PSR94812.1Antimicrobial peptide 2d like
XLOC_034108	PSS36443.1LysM domain receptor-like kinase
XLOC_034122	---NA---
XLOC_034133	XP_011088351.1CSC1-like protein At3g54510 isoform X1
XLOC_034190	RVW68686.1G-type lectin S-receptor-like serine/threonine-protein kinase
XLOC_034200	PSS35048.1OTU domain-containing protein
XLOC_034233	PSS29253.1NADPH oxidase
XLOC_034263	PSS17519.1Aldehyde dehydrogenase family 3 member like
XLOC_034313	PSS04444.1Glutamate synthase 1 [NADH] like
XLOC_034337	PSS24693.1External alternative NAD(P)H-ubiquinone oxidoreductase
XLOC_034418	PSR98223.1Phosphatidate phosphatase
XLOC_034534	---NA---
XLOC_034620	XP_021652762.1sulfite exporter TauE/SafE family protein 3-like
XLOC_034675	PSR99699.1Protein DA1-related like
XLOC_034791	OVA10153.1Chorismate synthase
XLOC_034850	PSS11977.1G-type lectin S-receptor-like serine/threonine-protein kinase
XLOC_034997	---NA---
XLOC_034998	---NA---
XLOC_035014	PSR89832.1NDR1/HIN1-Like protein
XLOC_035242	PSS01784.1Transcription initiation factor IIB-2
XLOC_035271	PSS30039.1Rhamnogalacturonate lyase
XLOC_035318	PSS31839.1Leucine-rich repeat receptor-like tyrosine-protein kinase
XLOC_035323	XP_012082417.1cell division cycle protein 48 homolog
XLOC_035339	PSS26364.13-phosphoshikimate 1-carboxyvinyltransferase
XLOC_035415	PSS17753.1UPF0182 protein like
XLOC_035496	XP_006380310.1MYB-like transcription factor ETC3
XLOC_035541	PSS24354.1BON1-associated protein
XLOC_035773	AGV53047.1leucoanthocyanidin dioxygenase
XLOC_035781	PSS28640.1Potassium transporter like
XLOC_035803	PSR84969.1E3 ubiquitin-protein like
XLOC_036169	ASU87428.1flavonoid 3',5'-hydroxylase
XLOC_036493	PSR91343.1GREB1-like protein
XLOC_036546	XP_023927173.1laccase-1 isoform X1
XLOC_036812	PSS15531.1Flocculation protein
XLOC_036970	XP_027070849.1cysteine-rich receptor-like protein kinase 10
XLOC_037035	PSS11863.1Receptor-like protein kinase
XLOC_037056	PSS08367.1Caffeoylshikimate esterase
XLOC_037122	PSS35726.1Autophagy-related protein like
XLOC_037169	PSS04455.1Dipeptidyl aminopeptidase
XLOC_037238	PON94897.1Glycoside hydrolase
XLOC_037265	PSR90259.1Acyl-activating enzyme 18, peroxisomal like
XLOC_037338	ATC41982.1transcription factor MYB5b
XLOC_037379	PSS11968.1VQ motif-containing protein
XLOC_037383	PSS10037.1Transcription termination factor like
XLOC_037430	XP_021294119.1BOI-related E3 ubiquitin-protein ligase 1-like isoform X2
XLOC_037500	PSR86487.1Cytochrome b-c1 complex subunit like
XLOC_037503	XP_011000921.1 transcription factor TGA2-like isoform X2
XLOC_037518	PSR86642.1Serine/threonine-protein kinase
XLOC_037595	PSR98045.1Nuclear valosin-containing protein
XLOC_037616	PSS01678.1Plant cysteine oxidase
XLOC_037663	PSS23757.1Photosystem I assembly protein like
XLOC_037788	PSS16380.1Citrate synthase, glyoxysomal like
XLOC_037819	PSR92868.1Glutathione S-transferase
XLOC_037915	---NA---
XLOC_037932	PSS03901.13-ketoacyl-CoA synthase
XLOC_037996	PSS14642.1Protein ALEX like
XLOC_038115	EOY14848.1 Peptide upstream open reading frame 5
XLOC_038239	PSS07342.1Beta-fructofuranosidase, insoluble isoenzyme like
XLOC_038402	PSS16242.1Chitin-inducible gibberellin-responsive protein
XLOC_038453	PSS05669.1Acyl-coenzyme A oxidase 3, peroxisomal like
XLOC_038459	XP_021685492.1transcription factor TCP4-like
XLOC_038542	PSS31857.11-phosphatidylinositol-3-phosphate 5-kinase
XLOC_038600	PSS11436.1Serine/threonine-protein kinase
XLOC_038629	PSS30176.1Cystinosin like
XLOC_038708	XP_023765903.1protein NDR1-like
XLOC_038865	PSS06277.1Charged multivesicular body protein
XLOC_038982	XP_022136854.1probable E3 ubiquitin-protein ligase RHG1A
XLOC_039117	PSS01263.1Glycosyl transferase, family 1 protein
XLOC_039228	PSR95411.1Protein RETICULATA-RELATED 4 like
XLOC_039430	XP_021907061.1non-specific lipid-transfer protein A-like
XLOC_039442	PSS30394.1Methyl-CpG-binding domain-containing protein
XLOC_039449	XP_019158931.1 calcium-binding protein PBP1-like
XLOC_039502	PSR99989.1Trehalose-phosphate phosphatase
XLOC_039504	EOY16027.1VQ motif-containing protein
XLOC_039508	AHL29282.1sucrose synthase 2
XLOC_039567	XP_015062742.1uncharacterized protein LOC107008284
XLOC_039672	EOY13972.1Myb domain protein 58 isoform 1
XLOC_039813	XP_021278294.1protein FANTASTIC FOUR 1
XLOC_039825	PSR89232.1AAA ATPase forming ring-shaped complexes like
XLOC_039865	PSR85159.1Inactive beta-amylase
XLOC_039924	XP_021670078.1protein ESKIMO 1-like isoform X5
XLOC_039927	PSS32529.1Protein like
XLOC_039939	AML23847.1putative bHLH transcription factor
XLOC_040054	PSS07868.1DnaJ subfamily B member like
XLOC_040132	PSS30311.1Glycerophosphodiester phosphodiesterase
XLOC_040141	PSS26949.1OTU domain-containing protein
XLOC_040142	PSS28776.1adenylate kinase
XLOC_040163	PSS30608.13-oxoacyl-[acyl-carrier-protein] synthase
XLOC_040435	XP_008229974.1 probable WRKY transcription factor 31
XLOC_040483	XP_010270070.1PREDICTED: uncharacterized protein LOC104606519
XLOC_040565	PSS09812.1E3 ubiquitin-protein like
XLOC_040671	XP_022756376.1transcription factor MYB30-like
XLOC_040760	XP_012439612.1 ethylene-responsive transcription factor ERF027-like
XLOC_040850	PSS23757.1Photosystem I assembly protein like
XLOC_040922	EOY29680.1Aspartate aminotransferase 3
XLOC_040972	PSS05082.1Phenylalanine ammonia-lyase
XLOC_041086	PSS16237.1Formin-like protein
XLOC_041213	PSS31654.12,3-bisphosphoglycerate-dependent phosphoglycerate mutase
XLOC_041223	PSR93449.1Oxalate--CoA ligase
XLOC_041264	PSS06301.1NAD(P)H dehydrogenaseFQR1-like
XLOC_041276	PSS02585.1Legume lectin domain protein
XLOC_041368	XP_018844047.1 crocetin glucosyltransferase, chloroplastic-like
XLOC_041421	PSR85333.1Protein translation factor like
XLOC_041483	---NA---
XLOC_041603	XP_011079224.1esterase C25G4.2
XLOC_041609	---NA---
XLOC_041624	XP_018840394.1 epidermis-specific secreted glycoprotein EP1-like
XLOC_041671	---NA---
XLOC_041672	XP_022742792.1transcription repressor MYB5-like
XLOC_041716	XP_002277672.1 protein phosphatase methylesterase 1 isoform X2
XLOC_041865	PSS00149.17-deoxyloganetin glucosyltransferase
XLOC_041997	RVW27758.1RHOMBOID-like protein 2
XLOC_042222	XP_023882469.1phospholipase SGR2
XLOC_042255	XP_015890980.2putative ABC transporter B family member 8
XLOC_042322	---NA---
XLOC_042378	AHY28938.1Na+/H+ antiporter
XLOC_042385	PSS19805.1BZIP transcription factor
XLOC_042441	ACB20696.1putative cold-inducible protein
XLOC_042555	XP_018827093.1 chalcone synthase 1-like
XLOC_042572	AYP70935.1endoglucanase 4
XLOC_043075	PON96330.1Chorismate mutase
XLOC_043083	PSS30478.1Chorismate mutase
XLOC_043090	XP_010089574.1UDP-glycosyltransferase 13
XLOC_043299	OAY73544.1Glycogen synthase kinase- MsK-3
XLOC_043302	PSR94693.1Phytoene synthase
XLOC_043462	PSS34611.1Zinc finger protein
XLOC_043534	PSR86015.1CSC1-like protein
XLOC_043564	AML23847.1putative bHLH transcription factor
XLOC_043622	PSS24225.1Acid phosphatase/vanadium-dependent haloperoxidase-related protein
XLOC_043646	XP_021622977.1uncharacterized protein LOC110622686
XLOC_043764	---NA---
XLOC_043774	XP_002282169.1 ethylene-responsive transcription factor ERF109
XLOC_043783	XP_002323073.2RING-H2 finger protein ATL74
XLOC_043923	PSR93134.1Protein phosphatase
XLOC_044131	PSS35866.1Protein farnesyltransferase/geranylgeranyltransferase type-1 subunit alpha like
XLOC_044132	RVW28566.1hypothetical protein CK203_094797
XLOC_044180	XP_024987877.1aspartate aminotransferase, mitochondrial
XLOC_044222	XP_008227368.1 metacaspase-9
XLOC_044321	PSR90142.1DNA-directed RNA polymerase
XLOC_044402	PSR90954.1Transmembrane protein like
XLOC_044406	XP_010249181.1 transmembrane protein 53-like
XLOC_044461	---NA---
XLOC_044478	PSR85351.1Acyl-CoA N-acyltransferase protein
XLOC_044597	PSS20988.1WRKY transcription factor
XLOC_044634	PSS17813.1Tetraspanin-19 like
XLOC_044637	PSS34597.1Sushi, nidogen and EGF-like domain-containing protein
XLOC_044659	PSS21184.1Calcium-binding protein
XLOC_044664	PSS29016.1DNA-directed RNA polymerase subunit beta like
XLOC_044685	PSS03061.1DnaJ subfamily B member like
XLOC_044699	XP_021643359.1rust resistance kinase Lr10-like
XLOC_044702	XP_021643359.1rust resistance kinase Lr10-like
XLOC_044831	XP_018824334.1 granule-bound starch synthase 1, chloroplastic/amyloplastic-like isoform X1
XLOC_044835	PSS19580.1Clathrin assembly protein
XLOC_044889	XP_022847987.1putative hydrolase C777.06c isoform X2
XLOC_045060	---NA---
XLOC_045079	PSR91350.1Pentatricopeptide repeat-containing protein
XLOC_045091	XP_009623499.1 probable carotenoid cleavage dioxygenase 4, chloroplastic
XLOC_045111	XP_024950263.1lysM domain receptor-like kinase 3 isoform X1
XLOC_045282	PSR95335.1Protein like
XLOC_045304	XP_016580580.1 protein NRT1/ PTR FAMILY 6.4-like
XLOC_045345	PSR95767.1Exocyst complex component EXO70A1 like
XLOC_045372	PSR93105.1Signal transduction histidine-protein kinase
XLOC_045400	ACL54955.1flavanone 3-hydroxylase
XLOC_045655	XP_015899916.1pirin-like protein
XLOC_045685	XP_027094698.1probable protein phosphatase 2C 12
XLOC_045707	PSS20804.1Receptor-like serine/threonine-protein kinase
XLOC_045709	XP_022879686.1receptor-like serine/threonine-protein kinase ALE2
XLOC_045759	BAM42669.1dihydroflavonol 4-reductase
XLOC_045760	XP_027178650.1gamma carbonic anhydrase 1, mitochondrial
XLOC_045767	BAM42669.1dihydroflavonol 4-reductase
XLOC_045824	PSR99534.1Alcohol dehydrogenase-like
XLOC_045843	PSS11424.1CLE12p like
XLOC_045848	PSS21817.1Serine/threonine-protein kinase
XLOC_045929	PSS36067.1Graves disease carrier protein
XLOC_045955	P45726.1RecName: Full=Phenylalanine ammonia-lyase
XLOC_046115	PSS06389.1Phenazine biosynthesis PhzF protein
XLOC_046211	AVL95372.1transcription factor WRKY2
XLOC_046298	XP_002277051.1 universal stress protein PHOS32
XLOC_046299	XP_019158931.1 calcium-binding protein PBP1-like
XLOC_046303	XP_012085049.1ninja-family protein mc410
XLOC_046312	---NA---
XLOC_046321	PSS30175.1UPF0711 protein like
XLOC_046369	XP_010663114.1 lysine-specific demethylase JMJ706 isoform X1
XLOC_046488	PSR94897.1Tyrosine decarboxylase
XLOC_046571	PSS09712.1WAT1-related protein
XLOC_046649	PSS24740.1B-box zinc finger protein
XLOC_046723	PSS20916.1Metallothiol transferase
XLOC_046756	PSS28910.1Berberine bridge enzyme-like
XLOC_046769	PSS36595.1Protein like
XLOC_046856	PSS30735.1Ethylene-responsive transcription factor
XLOC_046947	PON57143.1Fatty acid desaturase, type
XLOC_046958	AYP64306.13-dehydroquinate dehydratase/shikimate dehydrogenase
XLOC_047108	PSS32533.1Zinc finger CCCH domain-containing protein
XLOC_047113	PSS34472.1Serine/threonine-protein kinase-like protein
XLOC_047200	AAU08174.1phenylalanine ammonia-lyase
XLOC_047212	XP_008374776.1 protein SAR DEFICIENT 1
XLOC_047348	---NA---
XLOC_047371	PSR89396.1Stress up-regulated Nod 19 protein
XLOC_047380	PSR84931.1ACD11 protein
XLOC_047514	XP_018827585.1 fumarylacetoacetase
XLOC_047696	PSR84732.1Pyruvate dehydrogenase E1 component subunit beta-1 like
XLOC_047745	---NA---
XLOC_047898	XP_007042911.2 phospho-2-dehydro-3-deoxyheptonate aldolase 2, chloroplastic
XLOC_047984	PSS08254.1Auxin-responsive protein
XLOC_048009	PNX78660.1isoflavone reductase-like protein
XLOC_048136	PSS36027.1Calcium-transporting ATPase
XLOC_048139	---NA---
XLOC_048159	PSS06062.1Stachyose synthase
XLOC_048172	PSR98616.1Glutamate receptor 2.7 like
XLOC_000594	ADF43751.1anthocyanidin reductase
XLOC_000840	---NA---
XLOC_001302	XP_022953931.1late embryogenesis abundant protein D-34-like
XLOC_001766	KZV41679.1lipid binding protein
XLOC_002137	PSS21249.1RNA-binding E3 ubiquitin-protein like
XLOC_002392	NP_001313004.1galactinol synthase 2
XLOC_002656	AJF46885.1bHLH transcription factor MYC1
XLOC_004009	PSS33944.1Agamous-like MADS-box protein
XLOC_004013	PSS15775.1Uro-adherence factor A like
XLOC_004759	---NA---
XLOC_007519	XP_022774060.1protein DETOXIFICATION 41-like
XLOC_009585	XP_023924850.13-hydroxyisobutyryl-CoA hydrolase-like protein 5
XLOC_010218	XP_024932860.1cytokinin riboside 5'-monophosphate phosphoribohydrolase LOG5 isoform X2
XLOC_010484	PSS31659.1Heavy metal-associated isoprenylated plant protein
XLOC_012766	PSR91409.1Oligopeptide transporter like
XLOC_013494	PSS35058.1Proline dehydrogenase
XLOC_015720	PSS20916.1Metallothiol transferase
XLOC_016531	AUT30534.1chalcone isomerase
XLOC_016873	PSR91385.1Mitogen-activated protein kinase kinase
XLOC_018093	PSS36472.1Submandibular gland secretory Glx-rich protein like
XLOC_018586	PSS32258.14-coumarate--CoA ligase like
XLOC_020412	---NA---
XLOC_023428	XP_015574748.1ATP-citrate synthase beta chain protein 2
XLOC_024040	AHL44980.14-coumarate:coenzyme A ligase 4
XLOC_025561	---NA---
XLOC_027157	XP_002279162.2 3-hydroxyisobutyryl-CoA hydrolase-like protein 5
XLOC_028835	---NA---
XLOC_028927	PSR95557.1Kinetochore protein NDC80
XLOC_031968	---NA---
XLOC_031971	---NA---
XLOC_032556	PSR86583.1Phenylalanine ammonia-lyase
XLOC_033040	XP_006492865.1late embryogenesis abundant protein 46-like
XLOC_033661	XP_016548729.1 tetraspanin-3-like
XLOC_036551	OVA17893.1Late embryogenesis abundant protein
XLOC_037279	PSS36484.1Late embryogenesis abundant protein like
XLOC_040296	PSS32562.17-deoxyloganetic acid glucosyltransferase
XLOC_042713	XP_006429871.1late embryogenesis abundant protein 46
XLOC_043263	PSR91409.1Oligopeptide transporter like
XLOC_043269	---NA---
XLOC_044179	PSS05821.1Protein DETOXIFICATION like
XLOC_045266	PSS19549.1Biotin carboxylase
XLOC_046267	PSS11503.1Pectinesterase inhibitor domain protein
XLOC_046758	PSS28910.1Berberine bridge enzyme-like
XLOC_046760	PSS28910.1Berberine bridge enzyme-like
XLOC_047554	EOY23204.1PAR1 protein
XLOC_048073	XP_018722393.1 serine carboxypeptidase-like 10

## Sheet: c
187 common elements in "ARS7 G3" and "ARS1 G3":
XLOC_020663	XP_023923916.1vinorine synthase-like
XLOC_000265	ADE34295.1aquaporin NIP6;6
XLOC_000680	OMO87107.1DNA-directed RNA polymerase, phage-type
XLOC_000803	ALP48442.1homodomain-leucine zipper protein ATHB-13-like protein
XLOC_000977	PSR91763.1Zinc finger CCCH domain-containing protein
XLOC_001028	XP_024443832.1probable LRR receptor-like serine/threonine-protein kinase At1g53440 isoform X2
XLOC_001189	ABZ05022.1delta-12 fatty acid desaturase
XLOC_001269	XP_024967871.1nuclear transcription factor Y subunit B-3-like
XLOC_001848	XP_015065114.1homeobox-leucine zipper protein ATHB-52-like
XLOC_002047	XP_011079729.1NAD(P)H-quinone oxidoreductase subunit T, chloroplastic
XLOC_002209	AYP70306.1beta-galactosidase 5
XLOC_003006	XP_015953926.1chlorophyll a-b binding protein 13, chloroplastic
XLOC_003319	RVX17910.1Transcription factor bHLH137
XLOC_003378	RVW52623.1Transcription factor bHLH137
XLOC_003386	AEI83424.1chloroplast ferredoxin I
XLOC_003419	PSS15609.1Serine incorporator
XLOC_003640	XP_023884284.1auxin-responsive protein IAA13-like
XLOC_003764	XP_024157154.1serine carboxypeptidase-like 51 isoform X2
XLOC_003867	XP_010262690.1 17.3 kDa class I heat shock protein
XLOC_004333	AOR05817.1pectinesterase 3
XLOC_004585	PSR95450.1Protein FAF-like
XLOC_005054	EEF29289.1 Alpha-expansin 4 precursor, putative
XLOC_005185	PSS36559.1MLO-like protein
XLOC_006259	XP_008244209.1 protein CURVATURE THYLAKOID 1B, chloroplastic
XLOC_006465	---NA---
XLOC_006487	XP_022736703.1probable pectate lyase 18
XLOC_006753	PSS32351.1Membrane-associated kinase regulator 6
XLOC_007163	PSR93130.1Thylakoid lumenal protein
XLOC_007280	PSS07449.1Sulfate transporter 3.4 like
XLOC_007832	EEF45108.1 2,4-dienoyl-CoA reductase, putative
XLOC_008291	PSR91843.1PEARLI1-like lipid transfer protein
XLOC_008344	PON73782.1Serine/threonine protein kinase
XLOC_008398	---NA---
XLOC_008989	PSS16247.1Indole-3-acetic acid-amido synthetase
XLOC_009273	AKM12330.1flavonoid 3'-hydroxylase 3
XLOC_009377	PSS30637.1Transcription factor bHLH93 like
XLOC_009977	PSR95194.1Homeobox-leucine zipper protein like
XLOC_010033	XP_010660588.1 protein RALF-like 27
XLOC_010438	XP_015869448.1vacuolar iron transporter homolog 4-like
XLOC_011650	PSS13905.1UPF0481 protein
XLOC_012003	---NA---
XLOC_012151	XP_017232830.1 endoglucanase E1-like isoform X1
XLOC_012459	XP_027084980.1amino acid permease 8-like
XLOC_013092	PSS28916.1Auxilin-related protein
XLOC_013362	PSS10324.1Galactinol--sucrose galactosyltransferase
XLOC_013436	XP_009627092.1 auxin-induced protein 15A-like
XLOC_013504	PSS09606.1Fimbrin-2 like
XLOC_013677	---NA---
XLOC_013800	PSS19866.1Neurotrophin receptor-interacting factor like
XLOC_014071	PSS07655.1Heavy metal-associated isoprenylated plant protein
XLOC_014537	XP_021643246.1transmembrane protein 45B
XLOC_014586	AZI71059.1transcription factor TGA3
XLOC_014677	XP_023919942.1homeobox-leucine zipper protein ATHB-14-like isoform X2
XLOC_015179	XP_022850983.1fasciclin-like arabinogalactan protein 11
XLOC_015684	PSS07319.1Auxin-binding protein like
XLOC_015688	PSS36282.1F-box/kelch-repeat protein
XLOC_015830	PSS01242.1Zinc finger CCCH domain-containing protein
XLOC_015975	PSR91738.1Cytochrome P450 711A1 like
XLOC_016144	XP_003632368.1 CLAVATA3/ESR (CLE)-related protein TDIF
XLOC_016252	PSS06338.1Auxin-induced protein like
XLOC_016375	XP_015867679.1auxin-responsive protein SAUR76-like
XLOC_016437	XP_023759460.1protein ACCELERATED CELL DEATH 6-like
XLOC_017276	XP_008337845.1 guanine nucleotide-binding protein subunit gamma 3
XLOC_018121	PON92989.1HMW glutenin
XLOC_018311	PSS01865.1Leucine-rich repeat extensin-like protein
XLOC_018610	XP_018827808.1 alpha-L-fucosidase 2-like isoform X1
XLOC_018943	---NA---
XLOC_019502	PSR91079.1Auxin efflux carrier component like
XLOC_019620	XP_002275001.1 formin-like protein 1
XLOC_019661	XP_011013147.1 expansin-A1
XLOC_019923	PSS36282.1F-box/kelch-repeat protein
XLOC_019991	PSS26925.1Two-component response regulator like
XLOC_019996	PSS26925.1Two-component response regulator like
XLOC_020072	XP_017409842.1 chlorophyll a-b binding protein 7, chloroplastic
XLOC_020080	PSR93226.1Cln5-like protein
XLOC_021196	PSR90014.1Kinesin-like protein
XLOC_021295	PSR86910.13-methyl-2-oxobutanoate hydroxymethyltransferase
XLOC_021343	XP_022855824.1probable beta-D-xylosidase 2 isoform X2
XLOC_022662	PSR90940.1Protein ASPARTIC PROTEASE IN GUARD CELL 2 like
XLOC_023563	XP_019155449.1 photosystem II 5 kDa protein, chloroplastic
XLOC_023564	XP_002515546.1TATA-binding protein-associated factor 2N
XLOC_023750	PSS18967.1Protein EFR3 B like
XLOC_024020	PSS29487.1Auxin-responsive protein
XLOC_024103	RWR81919.1LOB domain-containing protein 4-like protein
XLOC_024401	XP_010653229.1 probable glutamate carboxypeptidase 2
XLOC_024921	PIN00218.1Apoptotic ATPase
XLOC_026082	PSS13418.1LRR receptor-like serine/threonine-protein kinase precursor
XLOC_026487	PSR89984.1Auxin response factor like
XLOC_026681	RDX58144.1Chlorophyll a-b binding protein CP24 10A, chloroplastic
XLOC_027330	XP_011027643.1PREDICTED: uncharacterized protein LOC105127877
XLOC_027396	PSS21758.1Aquaporin PIP2-8 like
XLOC_027578	PSS17264.1Inactive receptor kinase
XLOC_027752	RVX19584.1Aspartyl protease family protein
XLOC_027812	XP_002300069.1pectate lyase
XLOC_028239	PSS32296.1Molybdate-anion transporter like
XLOC_028815	PSR98311.1Disease resistance RPP8-like protein
XLOC_029123	PSS07402.1Flavonol synthase/flavanone 3-hydroxylase
XLOC_029253	XP_010657383.1 uncharacterized GPI-anchored protein At4g28100
XLOC_029748	PSS31322.1Glucose-1-phosphate adenylyltransferase large subunit/amyloplastic like
XLOC_030425	XP_027180938.136.4 kDa proline-rich protein-like
XLOC_030457	PSR86039.1BTB/POZ domain-containing protein
XLOC_031193	XP_011002640.1 thaumatin-like protein
XLOC_031923	XP_025982471.1PI-PLC X domain-containing protein At5g67130 isoform X1
XLOC_031997	XP_023895459.12-alkenal reductase (NADP(+)-dependent)-like
XLOC_032026	PSS00063.1WAT1-related protein
XLOC_032116	XP_022738614.1probable auxin efflux carrier component 1c isoform X1
XLOC_032244	PSS30259.1Proline--tRNA ligase
XLOC_032259	PSS05598.1Cytidylate kinase
XLOC_032660	PIN15176.1AAA+-type ATPase
XLOC_032662	PIN15176.1AAA+-type ATPase
XLOC_032890	XP_027180101.1transcription factor bHLH30-like
XLOC_033091	XP_018851766.1 plastocyanin B'/B''
XLOC_033304	XP_006594833.1TBC1 domain family member 5 homolog A
XLOC_033472	PSS17462.1Mavicyanin like
XLOC_033677	XP_015931485.1ribulose bisphosphate carboxylase/oxygenase activase, chloroplastic
XLOC_033858	AHB17746.1GA repressor DELLA
XLOC_034052	PSS19594.1Aspartyl protease
XLOC_034100	---NA---
XLOC_034652	XP_015570769.1hydroxyproline O-arabinosyltransferase 3 isoform X2
XLOC_034685	RVW40532.1Heat stress transcription factor B-4
XLOC_034771	PSS02626.1Microtubule-associated protein
XLOC_034902	---NA---
XLOC_035175	PSS01143.1Allergen Act d like
XLOC_035230	AOY34426.1transcription factor BHLH055
XLOC_035335	XP_021298694.1TATA-binding protein-associated factor 2N
XLOC_035810	PSS24694.1Protein TRANSPORT INHIBITOR RESPONSE like
XLOC_036016	XP_007013833.1 TATA-binding protein-associated factor 2N
XLOC_036324	PSR86615.1Fos-related antigen 2 like
XLOC_036738	AZL56930.1cylin D3-1
XLOC_037350	PSR84611.1Inactive leucine-rich repeat receptor-like protein kinase
XLOC_037362	PSS16162.1Methyltransferase-like protein
XLOC_037482	PSS33361.1Optomotor-blind protein
XLOC_037564	PSS34603.1Mucin-21 like
XLOC_037669	XP_002285467.2 AP2-like ethylene-responsive transcription factor ANT
XLOC_038003	AHB32109.1endoglucanase 6-like protein
XLOC_038017	PSS07911.1Mini zinc finger protein
XLOC_038030	XP_017232830.1 endoglucanase E1-like isoform X1
XLOC_038278	PSS01892.1Protein ABIL5
XLOC_038305	XP_012454984.1 protein RALF-like 32
XLOC_039160	XP_011084187.136.4 kDa proline-rich protein-like
XLOC_039163	XP_011084187.136.4 kDa proline-rich protein-like
XLOC_039224	AAW45741.1sinapyl alcohol dehydrogenase-like protein
XLOC_039393	XP_002275678.1 L-ascorbate oxidase
XLOC_039461	XP_019155449.1 photosystem II 5 kDa protein, chloroplastic
XLOC_039662	PSS26570.1Wall-associated receptor kinase-like
XLOC_039831	PSS19540.1Transcription factor like
XLOC_040037	PSS23640.1Pectate lyase
XLOC_040055	XP_012080196.1ATPase 11, plasma membrane-type
XLOC_040218	XP_027162808.1auxin transporter-like protein 2
XLOC_040441	---NA---
XLOC_040519	RVW49798.1Filament-like plant protein 7
XLOC_041284	PSS29304.1Triacylglycerol lipase
XLOC_041329	XP_021284682.1uncharacterized protein LOC110416878
XLOC_041581	PSS07669.1Protein SHOOT GRAVITROPISM like
XLOC_041759	---NA---
XLOC_042018	XP_016468094.1 disease resistance protein RPP13-like
XLOC_043145	PSS18001.1Protein WALLS ARE THIN like
XLOC_043173	RVW23686.1Retrovirus-related Pol polyprotein from transposon TNT 1-94
XLOC_043412	XP_010656764.1 subtilisin-like protease SBT2.5 isoform X1
XLOC_043427	XP_022728030.136.4 kDa proline-rich protein-like
XLOC_043431	---NA---
XLOC_043584	PSR89564.1Short-chain dehydrogenase
XLOC_043944	PSR99639.1Cysteine protease RD21B precursor
XLOC_044428	PSS29326.1U-box domain-containing protein
XLOC_044477	XP_019253835.1 protein MARD1
XLOC_044639	PSR95191.1Protein HEG 1 like
XLOC_044843	---NA---
XLOC_044935	AYP70924.1beta-galactosidase 4
XLOC_045032	---NA---
XLOC_045192	PSS33214.1Ethylene-responsive transcription factor 5 like
XLOC_045267	XP_012078100.1protein MARD1
XLOC_045590	XP_023913108.1transcription factor MYBS1
XLOC_045730	PSS36144.1Protein NUCLEAR FUSION DEFECTIVE like
XLOC_046107	PSR86058.1Basic 7S globulin 2 like
XLOC_046589	PWZ53585.140S ribosomal protein S3a
XLOC_046805	XP_011096520.1chlorophyll a-b binding protein 21, chloroplastic
XLOC_047072	PSR96257.1Glycerophosphodiester phosphodiesterase
XLOC_047089	PSS24572.1ABC transporter C family member 9 like
XLOC_047388	---NA---
XLOC_047518	---NA---
XLOC_047525	---NA---
XLOC_047550	PSR89889.1Glucomannan 4-beta-mannosyltransferase
XLOC_047605	PSS23520.1Lecithin retinol acyltransferase
XLOC_047678	PSR86593.1Homeobox-leucine zipper protein like
XLOC_047709	XP_011072008.1probable pectate lyase 18
XLOC_047942	EEF40076.1 electron transporter, putative
XLOC_048296	XP_023917890.1protein BIG GRAIN 1-like E

## Sheet: d
185 common elements in "ARS7 G4" and "ARS1 G2":
XLOC_000338	AFD64619.1putative hydroxycinnamoyl-CoA:shikimate/quinate hydroxycinnamoyltransferase
XLOC_001206	PSS12092.1Protein TIFY like
XLOC_001850	PQP93939.1protein CLT1 chloroplastic
XLOC_001883	XP_024004214.1O-fucosyltransferase 19
XLOC_002128	ALO19885.1UDP-glycosyltransferase 91A5
XLOC_002251	PSS14374.1Myb-related protein like
XLOC_003555	XP_010027532.1 ATP-citrate synthase beta chain protein 1
XLOC_003673	PSR91814.1Pleiotropic drug resistance protein
XLOC_004095	---NA---
XLOC_004451	XP_009788813.1 ethylene-responsive transcription factor 9-like
XLOC_005336	XP_021297829.1 probable galacturonosyltransferase-like 10
XLOC_005533	PSR99519.1Vinorine synthase
XLOC_006757	PSS33019.1Late embryogenesis abundant protein
XLOC_006758	PSS33019.1Late embryogenesis abundant protein
XLOC_006954	PSS01314.1GDSL esterase/lipase
XLOC_007444	CBI31587.3unnamed protein product, partial
XLOC_007884	PSS00042.17-deoxyloganetin glucosyltransferase
XLOC_008876	XP_017227635.1 ADP,ATP carrier protein 1, mitochondrial-like
XLOC_009998	---NA---
XLOC_010234	---NA---
XLOC_010330	XP_022761195.1protein DMP2-like
XLOC_011630	PSS02952.1Purine permease
XLOC_011705	PSS17348.1Tetratricopeptide repeat like superfamily protein
XLOC_012182	PSS28924.1Berberine bridge enzyme-like
XLOC_012648	PSR93609.1Ankyrin repeat-containing protein
XLOC_014476	PSS29112.1RNA-directed RNA polymerase
XLOC_015117	PSS32485.1Protein SMAX1-LIKE like
XLOC_015884	PSS09939.1Annexin like
XLOC_016409	AOY10782.1bHLH transcription factor
XLOC_017175	PSS11977.1G-type lectin S-receptor-like serine/threonine-protein kinase
XLOC_017621	XP_016741834.1 4-coumarate--CoA ligase-like 5
XLOC_017836	PSS10133.1Linoleate 9S-lipoxygenase
XLOC_018029	---NA---
XLOC_018445	PSS26856.1U-box domain-containing protein
XLOC_018480	XP_021284704.17-deoxyloganetin glucosyltransferase-like
XLOC_019018	APA20280.1nitrate transporter 1:2
XLOC_019497	PSS10220.1MACPF domain-containing protein
XLOC_019628	PSS16142.1Mitogen-activated protein kinase kinase
XLOC_020894	RVX18197.1Protein nuclear fusion defective 4
XLOC_022218	PSS32880.1Transcription factor like
XLOC_022374	XP_015880786.17-deoxyloganetin glucosyltransferase-like isoform X2
XLOC_023284	PSR96776.1Protein NUCLEAR FUSION DEFECTIVE like
XLOC_023368	OMO65698.1VQ motif-containing protein
XLOC_027495	PSS04743.1Protein PLANT CADMIUM RESISTANCE like
XLOC_030618	PSS03142.1Cytochrome P450 94C1 like
XLOC_030831	EOX91638.1Class III peroxidase
XLOC_033621	XP_009348279.1 sigma factor binding protein 2, chloroplastic
XLOC_034226	PSR86663.1Exocyst complex component EXO70A1 like
XLOC_034330	XP_002268701.1 arogenate dehydratase 3, chloroplastic
XLOC_034361	XP_021676739.1phospholipase A1-IIgamma-like
XLOC_035578	PSS01148.13-ketoacyl-CoA synthase
XLOC_035660	PNS97324.1hypothetical protein POPTR_016G015600
XLOC_035776	PSS04077.1Vacuolar-processing enzyme like
XLOC_035950	PSS21004.1Cortactin-binding protein like
XLOC_036129	PSR86275.1LRR receptor-like serine/threonine-protein kinase
XLOC_036386	PSS34282.1Late embryogenesis abundant protein
XLOC_038053	PSS32458.1Nuclear transition protein like
XLOC_038746	AWI98008.1lipoxygenase 4
XLOC_038944	RVX08030.11-aminocyclopropane-1-carboxylate oxidase
XLOC_039426	XP_024444678.1protein FEZ
XLOC_040131	PSS24218.1Cyclic nucleotide-gated ion channel like
XLOC_040761	XP_023924616.1cytochrome P450 CYP749A22-like
XLOC_040978	XP_024989812.13-hydroxy-3-methylglutaryl-coenzyme A reductase-like
XLOC_041104	---NA---
XLOC_041285	ALO19890.1UDP-glycosyltransferase 84A22
XLOC_041981	PSS24472.1Arabinogalactan protein 40 precursor
XLOC_041988	---NA---
XLOC_042984	PSS26767.1Ethylene-responsive transcription factor
XLOC_043135	PSS26907.1Developmental and secondary metabolism regulator veA like
XLOC_043303	XP_019428813.1 probable protein phosphatase 2C 49
XLOC_046127	XP_009356755.1 adenylate isopentenyltransferase 3, chloroplastic
XLOC_046195	AYP70310.1polygalacturonase 2
XLOC_048035	XP_012465184.1 alpha-xylosidase-like
XLOC_048160	PSS06065.1WRKY transcription factor 23
XLOC_000173	XP_023929428.1protein PIN-LIKES 3-like
XLOC_000257	XP_018848611.1 protein PIN-LIKES 3-like isoform X1
XLOC_000317	---NA---
XLOC_001078	PSS03948.1Cyclic nucleotide-gated ion channel like
XLOC_001285	AOQ25971.1latex chitinase protein
XLOC_001310	PSS30515.1Phenolic glucoside malonyltransferase
XLOC_003343	PSR88287.1UV excision repair protein
XLOC_003689	XP_027087886.1probable WRKY transcription factor 31
XLOC_004322	XP_008340696.1 cell wall / vacuolar inhibitor of fructosidase 1-like
XLOC_004712	XP_022742413.1trihelix transcription factor GT-3b-like
XLOC_005319	XP_021297829.1 probable galacturonosyltransferase-like 10
XLOC_006762	PSS33019.1Late embryogenesis abundant protein
XLOC_006983	PSR88190.1Cytochrome P450 CYP749A22 like
XLOC_007291	PSS35803.1Uclacyanin-3 like
XLOC_007428	XP_023929640.1transcription factor MYB62-like
XLOC_008769	PSS02613.1Berberine bridge enzyme-like
XLOC_009346	PSR85040.1Protein NRT1/ PTR FAMILY 2.13 like
XLOC_009442	XP_024191538.1cyclin-dependent protein kinase inhibitor SMR4
XLOC_010107	PSS01995.1Serine/threonine-protein kinase
XLOC_010752	AYA60150.1vacuolar amino acid transporter 5
XLOC_011543	PSS34754.1CBL-interacting serine/threonine-protein kinase
XLOC_011571	PIN04555.1Copper chaperone
XLOC_011817	PSS17298.1Zinc finger protein
XLOC_013377	---NA---
XLOC_013956	XP_018822503.1 protein DMR6-LIKE OXYGENASE 2-like
XLOC_013958	PSS11264.1StAR-related lipid transfer protein like
XLOC_014079	PSS30798.1LysM domain receptor-like kinase
XLOC_014606	PON46081.1VQ motif containing protein
XLOC_015050	PSS14314.1Mitogen-activated protein kinase
XLOC_015333	XP_012070629.1putative calcium-binding protein CML19
XLOC_015460	NP_001312598.19-cis-epoxycarotenoid dioxygenase NCED1, chloroplastic-like
XLOC_016466	---NA---
XLOC_016786	PSS20916.1Metallothiol transferase
XLOC_017320	XP_002269464.1 11S globulin seed storage protein 2
XLOC_017402	PSR85975.1Protein EXORDIUM-like
XLOC_018099	XP_002269464.1 11S globulin seed storage protein 2
XLOC_018147	XP_024984682.1putative RING-H2 finger protein ATL35
XLOC_018403	XP_010655476.1 pathogenesis-related genes transcriptional activator PTI5
XLOC_019270	ASU87411.14-coumarate-CoA ligase
XLOC_020030	XP_027065422.1ethylene-responsive transcription factor ERF011-like
XLOC_020294	PSS29335.1Abscisic acid 8'-hydroxylase
XLOC_021414	---NA---
XLOC_021869	PSS16441.1Glutaredoxin-C9 like
XLOC_022678	PSR98808.1Threonylcarbamoyl-AMP synthase
XLOC_023303	OMO71750.1Malate synthase
XLOC_023550	PSS31373.1Pre-mRNA-splicing factor ATP-dependent RNA helicase
XLOC_023582	PSS03071.1Homeobox protein
XLOC_023685	RLN00992.1Methyltransferase-like protein 13
XLOC_025311	XP_024038647.1putative 12-oxophytodienoate reductase 11
XLOC_025709	PSS04865.1LRR receptor-like serine/threonine-protein kinase
XLOC_025975	PSS15651.1Pre-mRNA-processing factor 40 A like
XLOC_026614	XP_021638895.1subtilisin-like protease SBT1.4
XLOC_028172	XP_020233427.1cysteine-rich and transmembrane domain-containing protein A-like
XLOC_028355	XP_011088856.1pleiotropic drug resistance protein 2
XLOC_029592	XP_002274131.2 peroxidase 55
XLOC_029734	XP_018835529.1 endochitinase-like
XLOC_029735	XP_018835529.1 endochitinase-like
XLOC_029896	AST47454.1geranylgeranyl diphosphate synthase
XLOC_030002	PSR95817.1Aldose 1-epimerase
XLOC_030064	XP_015889291.1protein ALP1-like
XLOC_030247	PSS04865.1LRR receptor-like serine/threonine-protein kinase
XLOC_030445	PSS30533.1Cytochrome P450 85A1 like
XLOC_030458	PSS14657.1Monothiol glutaredoxin-S2 like
XLOC_030615	PSS03142.1Cytochrome P450 94C1 like
XLOC_030766	XP_021608228.112-oxophytodienoate reductase 3
XLOC_030894	PSS13865.1Umecyanin like
XLOC_030896	XP_009794603.1 blue copper protein-like
XLOC_031901	XP_003632205.1 glutathione S-transferase L3 isoform X1
XLOC_032747	EOY23208.1Cytochrome P450, family 715, subfamily A, polypeptide 1
XLOC_032773	RVX10566.1Metalloendoproteinase 2-MMP
XLOC_032781	XP_010048565.1 transcription factor bHLH35 isoform X1
XLOC_033517	PSS31373.1Pre-mRNA-splicing factor ATP-dependent RNA helicase
XLOC_034095	AHY03308.1allene oxide synthase
XLOC_034357	XP_021597983.1phospholipase A1-IIgamma-like
XLOC_034857	XP_002268298.1 pirin-like protein
XLOC_035596	---NA---
XLOC_035598	PSR84521.1Blue copper protein
XLOC_036022	XP_019165793.1 heavy metal-associated isoprenylated plant protein 26-like
XLOC_036205	XP_021661819.1transcription factor bHLH162-like isoform X2
XLOC_037069	PSS36654.1Mannitol dehydrogenase
XLOC_037188	PSS02912.112-oxophytodienoate reductase
XLOC_037723	PSR93241.1Sodium-coupled neutral amino acid transporter like
XLOC_037756	PSS13706.1Bidirectional sugar transporter like
XLOC_037957	PSR95216.14-coumarate--CoA ligase-like
XLOC_038224	PSS16242.1Chitin-inducible gibberellin-responsive protein
XLOC_038438	XP_023874311.1protein JINGUBANG-like
XLOC_039005	XP_023915964.1ethylene-responsive transcription factor ERF110-like
XLOC_039015	PSS26057.1Polyol transporter like
XLOC_039071	PSS08277.1Alpha,alpha-trehalose-phosphate synthase
XLOC_040436	PSR95593.1Mitogen-activated protein kinase kinase
XLOC_040455	PSS28752.1NAC transcription factor
XLOC_040562	PSS32690.1Leucoanthocyanidin dioxygenase
XLOC_041580	PSS00042.17-deoxyloganetin glucosyltransferase
XLOC_042262	PSS19777.1Calcium uniporter protein
XLOC_042370	PIM99090.1Shikimate O-hydroxycinnamoyltransferase
XLOC_042416	PSS24472.1Arabinogalactan protein 40 precursor
XLOC_042908	PSS04981.1Germin-like protein subfamily 3 member
XLOC_043482	PSR88287.1UV excision repair protein
XLOC_043493	PSS23567.1NDR1/HIN1-Like protein
XLOC_044627	PSR86365.1Desumoylating isopeptidase
XLOC_045100	PSS24058.1Protein tweety-2 like
XLOC_045450	PSS00466.1Alpha-mannosidase, light subunit like
XLOC_046502	XP_018820478.1 protein DETOXIFICATION 49-like
XLOC_046515	PSS12092.1Protein TIFY like
XLOC_046827	PSR85053.1F-box/kelch-repeat protein
XLOC_047111	XP_023900061.1probable 2-oxoglutarate-dependent dioxygenase At5g05600
XLOC_047588	PSS00364.1NDR1/HIN1-Like protein
XLOC_048105	AEI83423.1glutamyl-tRNA reductase
XLOC_012056	NP_001238027.2galactinol synthase
XLOC_012128	XP_002265050.1 basic form of pathogenesis-related protein 1
XLOC_027978	NP_001313004.1galactinol synthase 2

## Sheet: e
901 common elements in "ARS7 G5" and "ARS1 G5":
XLOC_000413	PSS04708.1Glucose-6-phosphate/phosphate translocator 2 like
XLOC_000502	ASJ80918.1L-ascorbate oxidase
XLOC_000730	PSS34770.1Phospholipid-transporting ATPase
XLOC_000833	XP_015882180.1non-specific phospholipase C6
XLOC_000911	XP_009589433.1 galacturonokinase isoform X2
XLOC_000981	PSS04968.1RING-H2 finger protein
XLOC_000998	---NA---
XLOC_001063	XP_002268278.2 indole-3-acetic acid-amido synthetase GH3.17
XLOC_001211	PSR89953.1Receptor-like serine/threonine-protein kinase
XLOC_001294	PSS16047.1Glutathione S-transferase
XLOC_001338	PSS14720.1BRCT domain-containing protein
XLOC_001406	XP_022864268.1aminopeptidase M1
XLOC_001507	XP_010652818.1 cyclin-dependent kinase inhibitor 7 isoform X1
XLOC_001620	PSS20951.1Formin-like protein
XLOC_001753	XP_016580865.1 myb-like protein X
XLOC_001862	PSR99470.1hypothetical protein CEY00_Acc23446
XLOC_001931	PON94924.1elongation factor
XLOC_002006	PSS17656.1Gamma-interferon-inducible lysosomal thiol reductase
XLOC_002010	PSS23843.1Gamma-interferon-inducible lysosomal thiol reductase
XLOC_002172	PSR96049.1Myosin-10 like
XLOC_002177	PSR84612.1Serine carboxypeptidase-like
XLOC_002179	PSS27006.1Protein NEOXANTHIN-DEFICIENT like
XLOC_002325	XP_023920789.1serine/threonine-protein kinase dst1 isoform X2
XLOC_002358	PSR95988.1ACT domain-containing protein
XLOC_002400	PSS20817.1Deoxyhypusine synthase
XLOC_002428	PSS11537.1Zinc finger protein
XLOC_002537	XP_009589283.1 serine/threonine-protein kinase Nek6 isoform X1
XLOC_002679	PSS03090.1PsbP domain-containing protein
XLOC_002738	XP_021600539.1heat stress transcription factor B-4-like
XLOC_002819	XP_017223710.1 GDSL esterase/lipase At5g14450-like
XLOC_002955	XP_015388040.1agamous-like MADS-box protein AGL61
XLOC_003055	PSS04928.1Vacuolar protein sorting-associated protein
XLOC_003068	XP_002279563.1 receptor protein kinase CLAVATA1
XLOC_003074	RVX03272.1ABC transporter B family member 13
XLOC_003100	RVW24301.1CRIB domain-containing protein RIC4
XLOC_003172	APR72759.1TPS1.2a splice variant
XLOC_003318	PSR89420.1Dual specificity protein like
XLOC_003428	XP_002284376.1 ureidoglycolate hydrolase isoform X1
XLOC_003479	XP_019079328.1 probable receptor-like protein kinase At1g11050
XLOC_003480	PSS02872.1hypothetical protein CEY00_Acc21252
XLOC_003702	PSS04697.1Lactoylglutathione lyase
XLOC_003812	PSR98256.1Paraspeckle component like
XLOC_003957	PSS24250.1Protein CURVATURE THYLAKOID 1A like
XLOC_004011	PSR92648.1Divinyl chlorophyllide a 8-vinyl-reductase
XLOC_004067	XP_010244946.1 prolycopene isomerase, chloroplastic
XLOC_004072	RVW59694.1Cyclic dof factor 2
XLOC_004200	RVW41746.1DNA (cytosine-5)-methyltransferase CMT2
XLOC_004209	AST13891.1late embryogenisis abundant protein 6
XLOC_004364	XP_011072099.1ABC transporter G family member 11
XLOC_004410	XP_022885264.1probable xyloglucan endotransglucosylase/hydrolase protein B
XLOC_004425	XP_020419367.1uncharacterized protein LOC18776843
XLOC_004568	PSS04815.1ABC transporter like
XLOC_004689	XP_011099677.1ultraviolet-B receptor UVR8 isoform X1
XLOC_004721	PSS26580.1TBCC domain-containing protein
XLOC_004803	PSS00056.1Thioredoxin like
XLOC_004983	PSS09511.1Serine/threonine-protein kinase
XLOC_005067	PSS02877.1ATP-dependent DNA helicase Q-like
XLOC_005110	PSR85115.1Condensin-2 complex subunit like
XLOC_005190	RWR74797.1DUF659 domain-containing protein/Dimer_Tnp_hAT domain-containing protein
XLOC_005191	PSR96596.1ABC transporter B family member 25 like
XLOC_005205	XP_024198632.1protein LHCP TRANSLOCATION DEFECT isoform X3
XLOC_005211	XP_016483786.1 acylphosphatase-like isoform X1
XLOC_005282	PSS04093.1Proline-rich receptor-like protein kinase
XLOC_005373	PSS09748.1AT-hook motif nuclear-localized protein
XLOC_005537	PSR89597.1RNA-dependent RNA polymerase
XLOC_005588	PSR85186.1Armadillo-type fold protein
XLOC_005656	PSR98690.1Glycerol-1-phosphate dehydrogenase
XLOC_005752	---NA---
XLOC_005884	---NA---
XLOC_005904	XP_018809494.1 somatic embryogenesis receptor kinase 1
XLOC_006082	EOX92127.1 Hematological and neurological expressed 1-like protein
XLOC_006090	---NA---
XLOC_006182	PSS32737.1WEB family protein
XLOC_006311	PSS30372.1Protein rolling stone like
XLOC_006338	PSS19099.1Disease resistance protein
XLOC_006339	PSR99718.1Titin like
XLOC_006503	XP_011073815.1putative disease resistance protein At1g50180
XLOC_006609	PSR95363.1G-type lectin S-receptor-like serine/threonine-protein kinase
XLOC_006681	XP_016500275.1 transcription factor TCP23-like
XLOC_006750	PSS28579.1Protein timeless like
XLOC_006760	PSS33013.1S-type anion channel like
XLOC_006976	---NA---
XLOC_007068	---NA---
XLOC_007069	PSR98709.1Homoserine O-succinyltransferase
XLOC_007268	RVX01939.1putative membrane protein YjcL
XLOC_007316	XP_002284018.2 probable glycosyltransferase At5g03795
XLOC_007323	PSS24393.1Calcium-dependent protein kinase
XLOC_007392	PSS29256.1Pyruvate kinase isozyme A like
XLOC_007464	PSR89347.1Receptor-like protein kinase
XLOC_007517	PSS11309.1Deoxyhypusine synthase
XLOC_007533	XP_010255273.1PREDICTED: uncharacterized protein LOC104596004
XLOC_007572	PSR94994.1Glyoxylate/succinic semialdehyde reductase
XLOC_007577	PSS14192.1Potassium transporter like
XLOC_007659	XP_006435723.2 cytochrome P450 90A1
XLOC_007914	PSR96236.1Exocyst complex component EXO70A1 like
XLOC_007930	PSS21128.1Nudix hydrolase
XLOC_007946	PSS07711.1B3 domain-containing protein
XLOC_007969	PSS36694.1BTB/POZ domain-containing protein
XLOC_008030	XP_022866509.1alpha-L-fucosidase 1-like
XLOC_008100	PSS01816.1Protein EFR3 B like
XLOC_008115	PSR90014.1Kinesin-like protein
XLOC_008127	XP_027082658.1protein IQ-DOMAIN 1-like
XLOC_008176	PON99161.1Glycine dehydrogenase (decarboxylating)
XLOC_008213	---NA---
XLOC_008247	PSS01824.1Mitotic apparatus protein like
XLOC_008312	PSS33077.1Protein O-glucosyltransferase
XLOC_008380	PSR98545.1Cyclin-D6-1 like
XLOC_008558	PSS00368.1MLO-like protein
XLOC_008596	PSR91217.1Protein MIZU-KUSSEI like
XLOC_008608	PSR96658.1Calcium-dependent protein kinase
XLOC_008686	PSS33860.1Taste receptor type 1 member 2 like
XLOC_008787	PSS01097.1Receptor-like protein kinase
XLOC_008804	PSS33724.1ABC transporter B family member 15 like
XLOC_008862	---NA---
XLOC_009005	PSS30739.1Histone-lysine N-methyltransferase
XLOC_009010	---NA---
XLOC_009105	PSR90951.1Myosin-1 like
XLOC_009124	PSR98745.1Protein POLLENLESS like
XLOC_009276	CDY71747.1 BnaC08g46940D
XLOC_009426	PSS30358.1Nuclear pore complex protein
XLOC_009465	PSR86284.1Formin-like protein
XLOC_009572	OVA12613.1Basic-leucine zipper domain
XLOC_009617	---NA---
XLOC_009728	PSR98812.1C-Myc-binding protein
XLOC_009746	XP_027069064.1protein ELF4-LIKE 4-like isoform X1
XLOC_009767	PSS01301.1Vacuolar protein sorting-associated protein
XLOC_009866	AZL19367.1transcription factor ARF2
XLOC_009932	PSS11328.1Coiled-coil domain-containing protein
XLOC_010048	PSR89677.1Hornerin like
XLOC_010098	PSS06128.1Tetraacyldisaccharide 4'-kinase precursor
XLOC_010161	PSS01727.1Stomatal closure-related actin-binding protein
XLOC_010182	XP_002284720.1 HMG-Y-related protein A
XLOC_010341	PSS05960.1Rho GDP-dissociation inhibitor like
XLOC_010455	PSS02997.1LRR receptor-like serine/threonine-protein kinase
XLOC_010483	PSR89448.1hypothetical protein CEY00_Acc29649
XLOC_010518	XP_021636783.1heat stress transcription factor A-6b-like
XLOC_010674	PSS19226.1Glucose/ribitol dehydrogenase protein
XLOC_010749	PSS35144.1Intracellular ribonuclease
XLOC_010788	PSS35662.1Werner Syndrome-like
XLOC_010789	RVW99748.1Serine hydroxymethyltransferase 4
XLOC_010803	XP_002269182.1 probable galacturonosyltransferase-like 1
XLOC_010861	PSR99664.1Trans-acting T-cell-specific transcription factor GATA-3 like
XLOC_011139	---NA---
XLOC_011188	PSS13638.1RING finger protein
XLOC_011202	XP_018821509.1 probable disease resistance protein At4g27220
XLOC_011263	XP_021621945.1chloroplast stem-loop binding protein of 41 kDa b, chloroplastic
XLOC_011269	PSS01795.1RING-H2 finger protein
XLOC_011314	---NA---
XLOC_011365	PSS01329.1Triose-phosphate transporter domain protein
XLOC_011483	---NA---
XLOC_011550	PSS17683.1Saposin-D like
XLOC_011696	---NA---
XLOC_011774	PSS36008.1NADPH-dependent 1-acyldihydroxyacetone phosphate reductase
XLOC_011814	PSS24934.1Protein DETOXIFICATION like
XLOC_011875	PSS11390.1AT-rich interactive domain-containing protein
XLOC_012002	XP_017257211.1 GDSL esterase/lipase At4g10955-like
XLOC_012010	PSS31248.1Thaumatin-like protein
XLOC_012106	PSS30054.1Condensin complex subunit 3 like
XLOC_012122	PSS19759.1Nodulation protein like
XLOC_012248	XP_027170394.1peroxidase 3-like
XLOC_012409	XP_027083311.1scarecrow-like protein 28
XLOC_012685	PSS20876.1IST1-like protein
XLOC_012802	PSS06470.1Cytosol aminopeptidase
XLOC_012804	PSS26152.1Swi5-dependent recombination DNA repair protein
XLOC_012856	PSS17352.1VIN3-like protein
XLOC_012866	XP_027074007.1uncharacterized protein LOC113698395 isoform X1
XLOC_012927	XP_027348818.1expansin-A4 isoform X1
XLOC_013213	PSS28766.1Protein like
XLOC_013308	XP_006378055.2 lipase
XLOC_013441	PSS10152.1Receptor-like serine/threonine-protein kinase
XLOC_013526	PSR88140.1Myosin-binding protein
XLOC_013593	PSS32753.1LRR receptor-like serine/threonine-protein kinase
XLOC_013648	PSS06421.1Protein like
XLOC_013739	PSS16142.1Mitogen-activated protein kinase kinase
XLOC_013801	PSR99591.1Hexokinase-2 like
XLOC_013815	PSR87792.1Solute carrier organic anion transporter family member 1B7 like
XLOC_013893	AGD98716.1aquaporin protein 13
XLOC_013959	XP_002278708.1 beta-1,6-galactosyltransferase GALT31A isoform X1
XLOC_014118	PSS23808.1Protein NRT1/ PTR FAMILY 5.5 like
XLOC_014254	---NA---
XLOC_014275	PON59234.1Regulator of chromosome condensation
XLOC_014295	XP_002266182.1PREDICTED: uncharacterized protein At5g01610
XLOC_014401	PSS28853.1ATP-dependent DNA helicase Q-like
XLOC_014407	XP_009596609.1 synaptotagmin-3-like isoform X1
XLOC_014512	PSR92480.1Serine carboxypeptidase-like
XLOC_014711	XP_024030957.1G-type lectin S-receptor-like serine/threonine-protein kinase At1g11410 isoform X1
XLOC_014767	AHI48503.1multidrug and toxic extrusion transporter
XLOC_014926	PSR85132.1Alanyl-tRNA editing protein like
XLOC_015208	PSS09972.1Golgi apparatus membrane protein
XLOC_015363	PSS05796.1Beta-1,3-N-acetylglucosaminyltransferase lunatic fringe like
XLOC_015473	XP_019178788.1 BI1-like protein
XLOC_015492	PSS24819.1Aspartic proteinase
XLOC_015497	PSS04191.1Histone deacetylase complex subunit like
XLOC_015699	XP_019178788.1 BI1-like protein
XLOC_015924	---NA---
XLOC_016152	PSS36338.1Extracellular matrix protein
XLOC_016153	PSR91814.1Pleiotropic drug resistance protein
XLOC_016158	PSS15635.1Rhodanese-like domain-containing protein
XLOC_016186	PSR92884.1RING-H2 finger protein
XLOC_016250	PSS15816.1Subtilisin-like protease
XLOC_016256	XP_006383684.1transcription factor UNE12
XLOC_016323	PSS14325.1Histidine kinase
XLOC_016563	PSR87682.1Granule-bound starch synthase
XLOC_016593	PSS33789.11-aminocyclopropane-1-carboxylate oxidase
XLOC_016665	PSR96314.1Calcium/calmodulin-regulated receptor-like kinase
XLOC_016683	PSS11434.1RHOMBOID-like protein
XLOC_016732	---NA---
XLOC_016802	PSR99476.1AT-rich interactive domain-containing protein
XLOC_016948	PSR86812.1ABC transporter G family member 15 like
XLOC_016960	PSR98385.1Non-classical arabinogalactan protein
XLOC_017002	XP_021813789.1ribulose bisphosphate carboxylase/oxygenase activase, chloroplastic isoform X1
XLOC_017201	XP_023873305.1LRR receptor-like serine/threonine-protein kinase GSO1
XLOC_017203	PSS09842.1Serine/threonine-protein kinase
XLOC_017224	PSR95641.1Calcium/calmodulin-regulated receptor-like kinase
XLOC_017265	PSS19639.1Increased DNA methylation like
XLOC_017341	ONM56721.1 Polygalacturonate 4-alpha-galacturonosyltransferase
XLOC_017420	XP_010249552.1 GATA transcription factor 12
XLOC_017427	---NA---
XLOC_017487	PSS07684.1Cycloeucalenol cycloisomerase
XLOC_017616	---NA---
XLOC_017655	XP_015170777.1 putative uncharacterized transmembrane protein DDB_G0293028 isoform X1
XLOC_017946	PSR85414.1Triose-phosphate transporter domain protein
XLOC_017956	---NA---
XLOC_017967	PSS04676.1Uclacyanin 1 like
XLOC_018077	PSR86488.1Cell division protein FtsZ 2-1 like
XLOC_018130	PSS04067.1Pathogenesis-related protein
XLOC_018203	PSR89301.1Protein NUCLEAR FUSION DEFECTIVE like
XLOC_018372	PSS02808.1CAMP-specific 3',5'-cyclic phosphodiesterase
XLOC_018397	EOY11667.1Galactose oxidase/kelch repeat superfamily protein, putative isoform 1
XLOC_018409	XP_024448435.1AP2-like ethylene-responsive transcription factor At1g16060
XLOC_018419	PSR89736.1Cysteine-rich repeat secretory protein like
XLOC_018557	PSS33186.1Leucine-rich repeat receptor-like protein kinase
XLOC_018667	---NA---
XLOC_018676	PSS11481.1Kinesin-like protein
XLOC_018796	XP_021661613.1nodulin-related protein 1-like
XLOC_018873	XP_010260335.1 receptor-like protein kinase HSL1
XLOC_018976	GAV88198.1Rif1_N domain-containing protein
XLOC_019195	ARQ20701.1auxin early response protein AUX/IAA9
XLOC_019311	PSS29248.1Pathogenesis-related protein PR-1 type like
XLOC_019383	PSS33484.1hydroxyproline-rich glycoprotein family protein
XLOC_019398	PSS04004.1C-terminal binding protein like
XLOC_019466	PSS33510.1CLE22p like
XLOC_019547	PSR89574.1Leaf rust 10 disease-resistance locus receptor-like protein kinase
XLOC_019711	XP_011088645.124-methylenesterol C-methyltransferase 2-like
XLOC_019804	PSR89764.1Transcription factor bHLH36 like
XLOC_019836	XP_018812066.1 endoglucanase 11-like isoform X2
XLOC_019896	PSS04986.1Dual specificity phosphatase protein
XLOC_019985	PSS15807.1Inactive leucine-rich repeat receptor-like protein kinase
XLOC_020013	XP_024924216.1protein ALP1-like
XLOC_020324	XP_010649564.1 probable polygalacturonase
XLOC_020379	PSS09694.1Dentin sialoprotein
XLOC_020418	---NA---
XLOC_020525	XP_022853410.1thaumatin-like protein 1
XLOC_020533	RVW96633.1Thaumatin-like protein 1b
XLOC_020569	PSS01778.1S-formylglutathione hydrolase
XLOC_020599	PSR87503.1Thymidylate kinase
XLOC_020738	PSS14626.1Aluminum-activated malate transporter like
XLOC_020807	XP_010656399.1 probable receptor-like protein kinase At5g20050
XLOC_020871	PSR85166.1DnaJ subfamily B member like
XLOC_020958	PSS35288.1Ankyrin-3 like
XLOC_020977	---NA---
XLOC_021386	PSR96875.1Membrane protein
XLOC_021741	PSR96679.1Thioredoxin-like fold protein
XLOC_021892	PSS01343.1Glycerol-3-phosphate acyltransferase
XLOC_021952	OTG28710.1 putative herpesvirus UL139, cytomegalovirus
XLOC_022029	PSS30107.1Kinesin-like protein
XLOC_022054	AFN85535.1PRp27-like protein
XLOC_022215	PSS20862.1Bark storage protein like
XLOC_022220	---NA---
XLOC_022320	PSS10269.1hypothetical protein CEY00_Acc17363
XLOC_022437	XP_017638034.1 protease 2 isoform X1
XLOC_022473	NP_001344256.1HSP20-like chaperone protein
XLOC_022551	PSS26301.1Delta(8)-fatty-acid desaturase
XLOC_022558	XP_027079541.1GATA transcription factor 7-like
XLOC_022559	PSS21372.1Leucine-rich repeat receptor-like protein kinase
XLOC_022705	CAC29435.1P-type H+-ATPase
XLOC_022863	PSR88007.1Dof zinc finger protein like
XLOC_022866	XP_003635142.1 dof zinc finger protein DOF1.1 isoform X2
XLOC_023098	PSR89473.1DNA replication regulator like
XLOC_023135	XP_022740314.1nitrate regulatory gene2 protein-like
XLOC_023146	PSS29524.1CDP-diacylglycerol--inositol 3-phosphatidyltransferase
XLOC_023202	---NA---
XLOC_023253	PSS15922.1Serine/arginine-rich SC35-like splicing factor
XLOC_023392	PSS09659.1Methyltransferase like
XLOC_023516	PON96687.1UBX domain-containing protein
XLOC_023653	XP_027063354.1VQ motif-containing protein 4-like
XLOC_023923	PSS11314.1Long chain acyl-CoA synthetase
XLOC_023981	PSS21828.1Expansin-A16 like
XLOC_024041	XP_012467608.1 hippocampus abundant transcript-like protein 1
XLOC_024084	XP_003631733.1 scarecrow-like protein 23
XLOC_024134	XP_011046684.1 putative amidase C869.01
XLOC_024169	XP_027086789.1lactoylglutathione lyase GLX1-like
XLOC_024255	PSS01301.1Vacuolar protein sorting-associated protein
XLOC_024607	XP_009802493.1 beta-xylosidase/alpha-L-arabinofuranosidase 1-like isoform X1
XLOC_025162	PSS13873.1UDP-sugar transporter like
XLOC_025208	PSR89102.1Isoaspartyl peptidase/L-asparaginase 1 subunit beta like
XLOC_025271	KYP44825.1Retrovirus-related Pol polyprotein from transposon TNT 1-94
XLOC_025287	XP_009763835.1 FAS-associated factor 2-like
XLOC_025341	PSS23932.1Xyloglucan endotransglucosylase/hydrolase
XLOC_025418	PSS26266.1Serine/threonine-protein kinase
XLOC_025496	PSS35824.1DNA mismatch repair protein
XLOC_025517	PSS21090.1Myb-related protein
XLOC_025603	PSS17767.1Protein WVD2-like
XLOC_025630	PSS19153.1Cyclase-associated protein
XLOC_025803	PSS31786.1GDP-fucose protein O-fucosyltransferase protein
XLOC_025963	---NA---
XLOC_026008	PSR95077.1E3 ubiquitin-protein like
XLOC_026336	XP_006345683.1PREDICTED: uncharacterized protein LOC102595979
XLOC_026363	PSS26496.1DNA-directed RNA polymerase V subunit like
XLOC_026503	PSR86602.1E3 ubiquitin-protein ligase MARCH10
XLOC_026597	---NA---
XLOC_027183	PSS13704.1Exocyst complex component EXO70B1 like
XLOC_027223	PSS26102.1Protein CHROMATIN REMODELING like
XLOC_027419	XP_008358568.1 UDP-N-acetylglucosamine diphosphorylase 1-like
XLOC_027450	AQK93773.1beta tubulin2
XLOC_027548	PSR86309.1Embryonic stem cell-specific 5-hydroxymethylcytosine-binding protein
XLOC_027550	PSR86315.1Ras-related protein like
XLOC_027712	QAV56503.1cold-resistant protein ICE1
XLOC_027811	XP_023895083.1BAG family molecular chaperone regulator 2-like
XLOC_027885	PSS36449.1Dammarenediol 12-hydroxylase
XLOC_027958	PSS26916.1Protein SIEVE ELEMENT OCCLUSION B like
XLOC_028011	XP_006469503.1zinc finger CCCH domain-containing protein 18 isoform X3
XLOC_028073	PSS11252.1Protein BRANCHLESS TRICHOME like
XLOC_028161	XP_002284134.1 ruBisCO large subunit-binding protein subunit beta, chloroplastic
XLOC_028397	CAC40825.1HcrVf1 protein
XLOC_028417	PSS23848.1Protein trichome birefringence-like
XLOC_028429	PSS32725.1Solute carrier family 40 member like
XLOC_028559	PSS17888.1Epoxide hydrolase-like protein
XLOC_028889	XP_015958179.1tubulin alpha-3 chain
XLOC_028966	XP_011078056.1ankyrin repeat-containing protein At5g02620-like isoform X2
XLOC_029065	PSS34790.1Potassium transport system protein kup
XLOC_029183	PSR87838.1Lipid phosphate phosphatase
XLOC_029321	AYP70927.1polygalacturonase 5
XLOC_029391	PSS35081.1GDP-fucose protein O-fucosyltransferase protein
XLOC_029418	EOY09560.1C2H2 and C2HC zinc fingers superfamily protein, putative
XLOC_029669	RVW51505.1Filament-like plant protein 4
XLOC_029717	PSR85990.1E3 ubiquitin-protein ligase BAH1-like
XLOC_029723	PSS14677.1DExH-box ATP-dependent RNA helicase
XLOC_029802	XP_021636078.1BTB/POZ domain-containing protein At1g30440-like
XLOC_029816	---NA---
XLOC_029820	ASJ80913.1gibberellin 2-oxidase 1
XLOC_029834	PSS34256.1Rust resistance kinase
XLOC_029926	XP_012478042.1 probable beta-1,3-galactosyltransferase 8
XLOC_030016	PSS00104.1Chlorohydroquinone/hydroquinone 1,2-dioxygenase
XLOC_030060	XP_022850330.1somatic embryogenesis receptor kinase 2
XLOC_030097	PSS11173.1Sucrose-phosphate synthase
XLOC_030144	PSS06318.1Serine-rich adhesin for platelets like
XLOC_030346	PSS21546.1Systemin receptor like
XLOC_030381	PSS11826.1Spindle and kinetochore-associated protein
XLOC_030791	PSS15826.1Syntaxin-132 like
XLOC_030881	PSS35227.150S ribosomal protein
XLOC_030909	XP_022731891.1protein SODIUM POTASSIUM ROOT DEFECTIVE 3-like
XLOC_031128	PSR98377.14-hydroxy-tetrahydrodipicolinate reductase
XLOC_031216	AGD98713.1aquaporin protein 10
XLOC_031342	XP_023912923.1probable 2-carboxy-D-arabinitol-1-phosphatase
XLOC_031559	PSS07546.1Major facilitator superfamily domain-containing protein
XLOC_031653	PSS14666.1Homeotic protein female sterile like
XLOC_031808	---NA---
XLOC_031934	PSS34949.1Lysine-specific demethylase
XLOC_032022	PSS29295.1Pathogenesis-related homeodomain protein
XLOC_032099	PSR96669.1Formin-like protein
XLOC_032155	OMP03350.1Tetratricopeptide-like helical
XLOC_032248	XP_022879720.1armadillo repeat-containing protein 7-like isoform X1
XLOC_032389	PSS00365.1hypothetical protein CEY00_Acc24333
XLOC_032404	PSS11380.1Glycoprotein-N-acetylgalactosamine 3-beta-galactosyltransferase
XLOC_032410	XP_027127436.1uncharacterized protein LOC113743585
XLOC_032428	PSS16436.1Homeobox-DDT domain protein
XLOC_032444	XP_021811787.1peroxidase 20
XLOC_032470	PON38571.1Metallothionein
XLOC_032471	RVW87358.1Protein TRM32
XLOC_032652	PSS29279.1QWRF motif-containing protein
XLOC_032698	PSR89536.1Cellulose synthase-like protein
XLOC_032820	PSS11964.1Vacuolar protein sorting-associated protein
XLOC_032926	RVW46540.1Peroxidase 31
XLOC_032938	RVX22906.1Transcription repressor OFP4
XLOC_033000	---NA---
XLOC_033103	XP_019076602.1 probable cadmium/zinc-transporting ATPase HMA1, chloroplastic isoform X2
XLOC_033116	PSS13704.1Exocyst complex component EXO70B1 like
XLOC_033117	EOY13993.1Laccase 17
XLOC_033126	PSS33174.1Monocopper oxidase-like protein
XLOC_033165	PSS31172.1Protein psiQ like
XLOC_033235	PSS31647.1Proteoglycan 4 C-terminal part like
XLOC_033249	ALJ99713.1aluminum-activated malate transporter
XLOC_033299	PSS30138.1TRNA (cytosine(34)-C(5))-methyltransferase
XLOC_033342	PSR86577.1Rho-associated protein kinase
XLOC_033346	PSS19015.1Plus-3 domain, subgroup protein
XLOC_033353	PRQ48027.1putative nucleotidyltransferase, Ribonuclease H
XLOC_033377	QAB45195.1eceriferum 4 protein
XLOC_033469	---NA---
XLOC_033544	PSS14622.1Phosphoglycerate mutase
XLOC_033564	PSR98702.1TBC1 domain family member 14 like
XLOC_033613	---NA---
XLOC_033670	PSS31500.1U-box domain-containing protein
XLOC_033716	---NA---
XLOC_033720	PSR93288.1Histone-lysine N-methyltransferase, H3 lysine-9 specific protein
XLOC_033721	EEF51628.1 cyclin-dependent protein kinase, putative
XLOC_033744	ACC60970.1phytochrome B
XLOC_033749	PSS31860.1Transcription factor bHLH80 like
XLOC_033785	---NA---
XLOC_033791	XP_021616382.1heat shock protein 83
XLOC_033823	PSS00478.1Calcium-dependent protein kinase
XLOC_034014	XP_002273874.2 separase isoform X1
XLOC_034034	PSS24686.1Calmodulin-binding protein 60 B like
XLOC_034127	PSS00350.1Protein PIN-LIKES like
XLOC_034174	PSR86912.1Acetyl-coenzyme A synthetase
XLOC_034181	---NA---
XLOC_034356	---NA---
XLOC_034513	PSS15779.1Protein DETOXIFICATION like
XLOC_034778	PSR90082.1Scarecrow-like protein
XLOC_034806	PSS36343.1Lon protease
XLOC_034887	ALF39596.1long-chain acyl-CoA synthetase 4
XLOC_034954	PSS01532.1Outer envelope pore protein like
XLOC_035081	PSS01118.1Beta-1,3-galactosyl-O-glycosyl-glycoprotein like
XLOC_035153	PSR89335.1Pyrophosphate-energized vacuolar membrane proton pump (H(+)-PPase) like
XLOC_035308	PSS11380.1Glycoprotein-N-acetylgalactosamine 3-beta-galactosyltransferase
XLOC_035465	PSR88202.1GDSL esterase/lipase
XLOC_035472	PSS02617.1Protein kinase
XLOC_035485	PSS01532.1Outer envelope pore protein like
XLOC_035624	PSS21245.1Membrane-associated kinase regulator
XLOC_035694	PSS23902.1Structural maintenance of chromosomes protein
XLOC_035735	PSS07754.1AP-1 complex subunit mu-2 like
XLOC_035740	PSS19857.1Receptor protein kinase
XLOC_035747	RVX04214.1Reticulon-like protein B3
XLOC_035764	PSS01117.1Clathrin assembly protein
XLOC_035824	XP_010533226.1 endoglucanase 25
XLOC_035826	PSS35932.1Homeobox-leucine zipper protein
XLOC_035967	CBI35339.3unnamed protein product, partial
XLOC_035984	XP_021895092.1probable boron transporter 2 isoform X1
XLOC_035985	PSR95873.1Boron transporter like
XLOC_036068	PSR91026.1E3 ubiquitin-protein like
XLOC_036082	RVW38599.1Dirigent protein 23
XLOC_036257	PSS32578.1Factor of DNA methylation like
XLOC_036272	XP_018824073.1 AAA-ATPase At2g18193-like
XLOC_036484	PSS21381.1Ubiquitin-conjugating enzyme like
XLOC_036535	XP_010551679.1 peroxisomal membrane protein PMP22
XLOC_036661	---NA---
XLOC_036740	PSS07275.1RING-H2 finger protein
XLOC_036872	XP_009797477.1 polygalacturonase QRT3
XLOC_036886	XP_019254346.1 probable methyltransferase PMT7
XLOC_037160	RVW63136.1Retrovirus-related Pol polyprotein from transposon TNT 1-94
XLOC_037175	XP_006435723.2 cytochrome P450 90A1
XLOC_037177	XP_022856723.1GDSL esterase/lipase CPRD49-like isoform X2
XLOC_037209	---NA---
XLOC_037353	PSR84612.1Serine carboxypeptidase-like
XLOC_037444	---NA---
XLOC_037585	---NA---
XLOC_037592	XP_021682400.1probable membrane-associated kinase regulator 3
XLOC_037620	PSS24267.12-oxoglutarate-dependent dioxygenase
XLOC_037684	XP_015895666.1probable galacturonosyltransferase-like 3
XLOC_037733	XP_027119677.1probable inactive histone-lysine N-methyltransferase SUVR2 isoform X2
XLOC_037770	XP_019232261.1 BI1-like protein
XLOC_037810	---NA---
XLOC_037853	XP_020533637.1protein O-linked-mannose beta-1,4-N-acetylglucosaminyltransferase 2
XLOC_037913	PSR87779.1Basic leucine zipper like
XLOC_038004	XP_023876008.1transketolase, chloroplastic isoform X1
XLOC_038027	---NA---
XLOC_038041	XP_004288495.1 probable mannitol dehydrogenase
XLOC_038072	PSS19476.1Serine carboxypeptidase-like
XLOC_038261	PSR98198.1DNA helicase
XLOC_038376	XP_021277350.1VAN3-binding protein isoform X2
XLOC_038448	ALL97704.1bZIP transcription factor 17
XLOC_038489	PSR84928.1CTL-like protein
XLOC_038613	XP_002276880.1 scarecrow-like protein 28 isoform X1
XLOC_038625	XP_023895083.1BAG family molecular chaperone regulator 2-like
XLOC_038720	XP_006448063.1non-functional NADPH-dependent codeinone reductase 2
XLOC_038862	XP_010260051.1 receptor-like protein kinase THESEUS 1
XLOC_039052	PSS10341.1UDP-3-O-acylglucosamine N-acyltransferase
XLOC_039069	GAV67003.1Cellulose_synt domain-containing protein
XLOC_039314	PSR94731.1COBRA-like protein
XLOC_039318	PSR94731.1COBRA-like protein
XLOC_039408	XP_011073666.1putative pentatricopeptide repeat-containing protein At5g65820 isoform X2
XLOC_039550	---NA---
XLOC_039568	XP_027106256.1metacaspase-3-like isoform X1
XLOC_039590	---NA---
XLOC_039718	XP_012831577.1 probable linoleate 9S-lipoxygenase 5
XLOC_039815	PSR95404.1Transcription factor like
XLOC_039845	XP_017215780.1 zinc finger RNA-binding protein 2-like
XLOC_040026	XP_011069335.115.7 kDa heat shock protein, peroxisomal
XLOC_040113	PSS20727.1Auxin response factor like
XLOC_040165	PSR87842.1S-adenosylmethionine-dependent methyltransferase
XLOC_040251	---NA---
XLOC_040270	PSR95514.1Phosphoglycerate kinase
XLOC_040314	PSS11493.1Protein STRUBBELIG-RECEPTOR FAMILY 8 like
XLOC_040416	PSS33667.1Chorismate mutase
XLOC_040460	PSR96358.1Choline transporter-like protein
XLOC_040643	PSS35103.1Protein LONGIFOLIA like
XLOC_040794	PSS04362.1Ascorbate transporter like
XLOC_040826	PSS30449.1Thioredoxin-like fold protein
XLOC_040943	PSS07889.1E3 ubiquitin-protein like
XLOC_040946	PSR90214.1Serine/threonine-protein kinase
XLOC_041026	PSS26863.1Peptidyl-prolyl cis-trans isomerase FKBP4, N-terminally processed like
XLOC_041309	CBL94163.1putative RNA-directed DNA polymerase (Reverse transcriptase)
XLOC_041370	PSS32790.1Receptor-like kinase
XLOC_041546	PSR96334.1Micronuclear linker histone-gamma like
XLOC_041547	XP_011087481.1protein disulfide-isomerase like 2-1-like
XLOC_041627	EOY08839.1PQ-loop repeat family protein / transmembrane family protein, putative isoform 1
XLOC_041644	XP_021904592.1ATPase 11, plasma membrane-type
XLOC_041760	RDX86405.1Transcription factor MYB36
XLOC_041803	XP_021887944.1probable polygalacturonase
XLOC_041822	PSR94872.1Protodermal factor 1 like
XLOC_041850	PSS05796.1Beta-1,3-N-acetylglucosaminyltransferase lunatic fringe like
XLOC_041930	XP_002270833.2 two-component response regulator ARR12
XLOC_042075	PSR89843.1hypothetical protein CEY00_Acc30036
XLOC_042295	PSS29300.1Epstein-Barr nuclear antigen 2 like
XLOC_042305	XP_015880250.1phosphatidylinositol 4-kinase gamma 5-like
XLOC_042454	PSR90050.1Glycine-rich RNA-binding protein
XLOC_042702	PON46917.1Lung seven transmembrane receptor-like
XLOC_042757	PSS36295.1Protein trichome birefringence like
XLOC_042791	NP_001294896.1non-specific lipid-transfer protein-like protein At2g13820 precursor
XLOC_042793	PSS33851.1Type IV inositol polyphosphate 5-phosphatase
XLOC_042843	PSS04092.1Deoxyribodipyrimidine photo-lyase
XLOC_043023	PSR93258.1Transcription factor RF2b like
XLOC_043032	PSS20992.1Drug/metabolite transporter protein
XLOC_043123	XP_021279911.1beta-xylosidase/alpha-L-arabinofuranosidase 2-like isoform X1
XLOC_043180	PSS18224.1E3 ubiquitin-protein like
XLOC_043185	XP_006489058.1UDP-glucuronic acid decarboxylase 2-like
XLOC_043190	PSS17681.1G-type lectin S-receptor-like serine/threonine-protein kinase
XLOC_043249	XP_015955232.1pollen-specific protein SF21 isoform X2
XLOC_043423	PSS11530.1Small heat shock protein
XLOC_043469	PSS23795.1TBC1 domain family member 5 B like
XLOC_043483	AZL56929.1auxin-responsive factor
XLOC_043589	PSS02585.1Legume lectin domain protein
XLOC_043726	PSS02636.1Nucleobase-ascorbate transporter like
XLOC_043761	PSR89830.1Receptor-like kinase
XLOC_043780	PSS32753.1LRR receptor-like serine/threonine-protein kinase
XLOC_043798	PSS24061.1Protein TonB like
XLOC_043827	PSS15834.1ABC transporter G family member 22 like
XLOC_043850	PSS11842.1Adenylate cyclase, terminal-differentiation specific like
XLOC_043891	PSS15516.1Nucleotide pyrophosphatase
XLOC_044125	CBI35339.3unnamed protein product, partial
XLOC_044171	PSS09709.1Myosin-1 like
XLOC_044235	PSS16338.1Callose synthase
XLOC_044337	XP_002285664.1 very-long-chain enoyl-CoA reductase
XLOC_044374	EOY27150.1ATPase E1-E2 type family protein / haloacid dehalogenase-like hydrolase family protein isoform 1
XLOC_044385	PSS33756.1Serine/threonine-protein kinase
XLOC_044426	XP_023912978.1tetratricopeptide repeat protein SKI3
XLOC_044481	XP_021981626.1non-specific lipid-transfer protein-like protein At2g13820
XLOC_044629	XP_010259348.1 putative beta-D-xylosidase
XLOC_044632	EOX95238.1Multidrug resistance protein ABC transporter family protein, putative
XLOC_044706	XP_022859779.1uncharacterized protein LOC111380444
XLOC_044708	XP_002275747.1 homeobox-leucine zipper protein HOX11
XLOC_044716	PSS30278.1UDP-glucuronate:xylan alpha-glucuronosyltransferase
XLOC_045102	PSS09382.1WRKY transcription factor
XLOC_045149	PSS23683.1Floral homeotic protein like
XLOC_045159	POO01947.1Basic helix-loop-helix transcription factor
XLOC_045166	AGT97338.1 EG2771
XLOC_045169	PSS30403.1Xyloglucan glycosyltransferase
XLOC_045283	PSR95334.1E3 ubiquitin-protein like
XLOC_045420	PSR89645.1Protein kinase
XLOC_045464	XP_021274469.1GATA transcription factor 18-like
XLOC_045689	PSS31409.1Succinate dehydrogenase subunit 5 like
XLOC_045835	PSS11426.1Methyl-CpG-binding domain-containing protein
XLOC_045862	XP_002276086.2 protein BIG GRAIN 1-like A
XLOC_046079	PSR89944.1OTU domain-containing protein
XLOC_046218	KZV54560.1putative inactive receptor kinase
XLOC_046223	PSR84768.1ELMO domain-containing protein
XLOC_046240	XP_027088988.1glucan endo-1,3-beta-glucosidase 1-like
XLOC_046252	XP_022750360.1uncharacterized protein At1g32220, chloroplastic-like isoform X1
XLOC_046724	PSR84489.1Dynein light chain like
XLOC_046727	XP_010656409.1 zinc finger CCCH domain-containing protein 34 isoform X1
XLOC_046746	ADU54137.1lateral organ boundaries domain 1
XLOC_046873	XP_007030588.2 calcium-transporting ATPase 12, plasma membrane-type
XLOC_046961	PSR92651.1Tubby-like F-box protein
XLOC_047084	PSR90162.1Interactor of constitutive active ROPs like
XLOC_047431	PSS21369.1Cell division cycle-associated 7-like protein
XLOC_047437	PSR86390.1Protein LONGIFOLIA like
XLOC_047446	XP_021642239.1desiccation-related protein At2g46140 isoform X1
XLOC_047491	PSS32811.1Protein IQ-DOMAIN like
XLOC_047561	XP_015898009.1probable auxin efflux carrier component 1b
XLOC_047616	PSS23526.1Laccase-6 like
XLOC_047818	PSS09594.1Alpha/beta hydrolase fold-1 protein
XLOC_047972	PSS15541.1Meiotic nuclear division protein
XLOC_048032	XP_023885945.1CDPK-related kinase 1-like isoform X2
XLOC_048156	PSS05991.1Glutamate receptor 3.4 like
XLOC_048247	EOX96654.1RNA/RNP complex-1-interacting phosphatase, putative
XLOC_048300	XP_023917890.1protein BIG GRAIN 1-like E
XLOC_048305	APB08593.1phytoene synthase
XLOC_048311	RVW64390.1Transposon Ty3-G Gag-Pol polyprotein
XLOC_048315	PSS35848.1Protein YIF1B-B like
XLOC_048322	AOR05830.1xyloglucan endotransglycosylase/hydrolase 12
XLOC_048323	AYP70949.1xyloglucan endotransglucosylase 11
XLOC_000108	PSS05109.1NDR1/HIN1-like protein
XLOC_000175	PSS08111.1Reticulon-like protein
XLOC_000256	---NA---
XLOC_001008	XP_023879597.1auxin-responsive protein SAUR50-like
XLOC_001300	PSS11801.1Transcription factor like
XLOC_001335	PSR94718.1DnaJ subfamily C member like
XLOC_001379	RVW88976.1Protein ABIL3
XLOC_001575	---NA---
XLOC_001687	PSR97913.1Protein LONGIFOLIA like
XLOC_002034	PSR91709.1Replication protein A subunit A like
XLOC_002082	PSS01922.1Ceramide glucosyltransferase-A like
XLOC_002304	EOY25274.1Inner membrane protein yohK isoform 1
XLOC_002344	XP_015866832.1cycloeucalenol cycloisomerase isoform X1
XLOC_002562	XP_027112556.1probable LRR receptor-like serine/threonine-protein kinase At4g37250
XLOC_002709	AHB32109.1endoglucanase 6-like protein
XLOC_002998	PSR89903.1Protein argonaute like
XLOC_003081	PSS11736.1Synaptotagmin-4 like
XLOC_003212	PSR96466.1Nudix hydrolase
XLOC_003230	ACR09748.1DIV3B protein
XLOC_003464	XP_021659491.1transcription factor bHLH30-like
XLOC_003687	XP_006449768.1wall-associated receptor kinase-like 15
XLOC_003926	PSS01164.1Cyclin-A2-2 like
XLOC_004173	PSS24533.1Myosin-12 like isoform 1
XLOC_004843	PSS23903.1Long-chain-alcohol oxidase
XLOC_004854	PSS31820.1Deoxycytidine kinase
XLOC_005108	XP_019181049.1 transmembrane emp24 domain-containing protein p24beta3-like
XLOC_005399	RVX23326.1Condensin-2 complex subunit G2
XLOC_005438	XP_023894207.1protein DAMAGED DNA-BINDING 2
XLOC_005836	KYP66220.1Retrovirus-related Pol polyprotein from transposon TNT 1-94
XLOC_005854	PSS17783.1EG45-like domain containing protein
XLOC_005881	PSR91786.1Protein NRT1/ PTR FAMILY 1.2 like
XLOC_005956	PSS24123.1Squamosa promoter-binding-like protein
XLOC_006037	XP_023878169.1probable leucine-rich repeat receptor-like protein kinase IMK3
XLOC_006264	XP_002284720.1 HMG-Y-related protein A
XLOC_006469	PSS19441.1Serine/threonine-protein kinase mps1
XLOC_006628	PSR93544.1E3 ubiquitin-protein like
XLOC_006929	PSS04312.1Transcription factor like
XLOC_007106	XP_021658677.1TMV resistance protein N-like isoform X1
XLOC_007112	PSR92886.1WAT1-related protein
XLOC_007317	XP_009617933.1 probable glycosyltransferase At5g03795 isoform X1
XLOC_007416	PSS11809.1Fasciclin-like arabinogalactan protein
XLOC_007448	PSR93155.1Rop guanine nucleotide exchange factor like
XLOC_007486	RVX23085.1Transposon TX1 uncharacterized 149 kDa protein
XLOC_007527	PSS08018.1GDP-fucose protein O-fucosyltransferase protein
XLOC_007635	PSS26780.1Inactive receptor kinase
XLOC_007776	PSS32583.1Glucan endo-1,3-beta-glucosidase
XLOC_007987	RVX18406.1Transcription factor MYB86
XLOC_008096	GAV82592.1DUF761 domain-containing protein
XLOC_008118	PSS04046.1GDP-fucose protein O-fucosyltransferase protein
XLOC_008248	PSS01823.1inactive leucine-rich repeat receptor-like protein kinase
XLOC_008480	XP_007150815.1hypothetical protein PHAVU_005G182800g
XLOC_008606	PSR96658.1Calcium-dependent protein kinase
XLOC_008643	PSS15430.1Kinesin-like protein
XLOC_008833	PSS26067.1Kinesin-like protein
XLOC_008908	RHN40110.1putative RNA-directed DNA polymerase
XLOC_009091	GAV67508.1AP2 domain-containing protein
XLOC_009560	PSS07240.1Serine/threonine-protein kinase
XLOC_009701	XP_021650643.1dof zinc finger protein DOF5.6
XLOC_009736	PSS07557.1Zinc finger protein
XLOC_009772	PSS02980.1Carboxy-terminal domain RNA polymerase II polypeptide A small phosphatase
XLOC_010127	PSS09659.1Methyltransferase like
XLOC_010253	XP_018812089.1 transcription factor TCP20-like
XLOC_010678	PSR89824.1Subtilisin-like protease
XLOC_010685	XP_011005317.1 protein CHUP1, chloroplastic-like
XLOC_010687	PSS28753.1Tetratricopeptide repeat protein like
XLOC_010769	---NA---
XLOC_010876	PSR98248.1Kinesin-like protein
XLOC_010948	PSS17741.1Protein BREAST CANCER SUSCEPTIBILITY like
XLOC_011329	PSR98448.1Myb-like protein
XLOC_011489	---NA---
XLOC_011801	PSS01618.1Protein CHROMOSOME TRANSMISSION FIDELITY like
XLOC_011818	XP_010272289.1 QWRF motif-containing protein 2-like
XLOC_011837	XP_009784669.1 carboxyvinyl-carboxyphosphonate phosphorylmutase, chloroplastic-like
XLOC_011964	PSS11693.1Ferric reduction oxidase
XLOC_012157	PSR88321.1Delta(24)-sterol reductase
XLOC_012305	PSS34666.1GDSL esterase/lipase
XLOC_012500	XP_017242847.1 pentatricopeptide repeat-containing protein At5g21222-like
XLOC_012661	PSR94965.1Cytochrome b561 and DOMON domain-containing protein
XLOC_012758	RVW46657.1Protein altered xyloglucan 4-like
XLOC_012810	XP_027345885.1tubulin alpha chain
XLOC_013145	XP_010660417.1 transcription factor bHLH75 isoform X1
XLOC_013824	PSS02996.1Receptor-like protein
XLOC_014001	PSR84943.1Serine/arginine-rich splicing factor like
XLOC_014313	PSS17528.1LysM domain-containing GPI-anchored protein
XLOC_014328	XP_010242607.1 copper transport protein ATX1-like
XLOC_014456	PSS19323.12-hydroxy-6-oxononadienedioate/2-hydroxy-6- oxononatrienedioate hydrolase
XLOC_014753	XP_021641963.1pectinesterase/pectinesterase inhibitor PPE8B-like
XLOC_014781	PSS17462.1Mavicyanin like
XLOC_014871	RVW17312.1Desiccation-related protein PCC13-62
XLOC_014969	PSR99512.1Niemann-Pick C1 protein
XLOC_015353	XP_010659901.1 protein tesmin/TSO1-like CXC 2 isoform X3
XLOC_015375	XP_023894827.1prolyl endopeptidase-like isoform X4
XLOC_015417	PSS35201.1RING-H2 finger protein
XLOC_015510	PSS21234.1BTB/POZ domain-containing protein
XLOC_015634	XP_021295312.1protein NRT1/ PTR FAMILY 5.6-like isoform X1
XLOC_015878	PQM33553.1trihelix transcription factor ASIL2
XLOC_015906	RVX15243.1 Lon protease 2
XLOC_016001	AOR05805.1endoglucanase 2
XLOC_016215	PSS32484.1Microtubule-actin cross-linking factor 1, like
XLOC_016420	EEF35101.1 fimbrin, putative
XLOC_016658	PSR99586.1Peptide chain release factor 1 like
XLOC_016660	PSS19862.1Tubulin beta-1 chain
XLOC_017146	PSR96049.1Myosin-10 like
XLOC_017165	PSS01806.1Disease resistance protein
XLOC_017245	XP_002270424.3 ankyrin-2
XLOC_017377	PSS04465.1Protein of unknown function DUF688 protein
XLOC_017600	PSS28949.1Wall-associated receptor kinase-like
XLOC_017671	PSR85212.1Protein SMAX1-LIKE like
XLOC_018189	XP_021821524.1glucan endo-1,3-beta-glucosidase 1
XLOC_018227	PSS35733.1Transcription factor bHLH113 like
XLOC_018235	XP_011096430.1U-box domain-containing protein 4-like
XLOC_018239	PSR93621.1Cytokinin dehydrogenase
XLOC_018295	XP_002266484.3PREDICTED: uncharacterized protein LOC100246465
XLOC_018440	OVA19616.1putative S-adenosyl-L-methionine-dependent methyltransferase
XLOC_018526	PSS21583.1Somatic embryogenesis receptor kinase
XLOC_018688	XP_010277428.1 probable aminotransferase ACS12
XLOC_018867	PHU02861.1Endoglucanase 10
XLOC_019042	RWR74115.1bHLH family protein
XLOC_019087	XP_009773010.1 pyruvate decarboxylase 2 isoform X1
XLOC_019110	PSR96979.1Xyloglucan glycosyltransferase
XLOC_019250	PSR88221.1Protein NSP-INTERACTING KINASE 1 like
XLOC_019260	BAO51835.1UDP-glycosyltransferase 94P1
XLOC_019295	PSS11204.1U-box domain-containing protein
XLOC_019381	PSS33478.1Protein like
XLOC_019385	PSS33560.1Werner Syndrome-like
XLOC_019423	PSS32421.1Microtubule-associated protein
XLOC_019439	PSS06345.1Translation initiation factor IF-2 like
XLOC_019489	PSS19660.1Protein like
XLOC_020223	KYP38253.1Peroxidase 39
XLOC_020499	PSS34942.1Diacylglycerol kinase
XLOC_020657	XP_027098616.1DNA polymerase alpha subunit B
XLOC_020703	XP_023895633.1annexin D2-like
XLOC_020764	XP_021602891.1putative phosphatidylglycerol/phosphatidylinositol transfer protein DDB_G0282107
XLOC_021285	PSS24158.1Protein unc-13 C like
XLOC_021373	XP_010266929.1 probable DNA helicase MCM9
XLOC_021390	PSS05645.1Polyadenylate-binding protein
XLOC_021593	PSS09606.1Fimbrin-2 like
XLOC_021813	PSR99755.1Glucose-induced degradation protein like
XLOC_021882	PSR96142.1NADP-dependent malic enzyme like
XLOC_022134	KVH99836.1Protein kinase, catalytic domain-containing protein
XLOC_022194	PSS30121.1hypothetical protein CEY00_Acc05297
XLOC_022205	---NA---
XLOC_022324	PSS24669.1Zinc finger CCCH domain-containing protein
XLOC_022401	PSR89614.1Paired amphipathic helix protein Sin3-like
XLOC_022496	PSS08111.1Reticulon-like protein
XLOC_022759	PSS09547.1Transcription repressor like
XLOC_022870	PSR88007.1Dof zinc finger protein like
XLOC_022902	XP_027095902.1CLAVATA3/ESR (CLE)-related protein 43 isoform X1
XLOC_023120	PSS12033.1Auxin-responsive protein
XLOC_023138	OVA03808.1Major intrinsic protein
XLOC_023157	RDX61065.1MORC family CW-type zinc finger protein 3
XLOC_023370	PSR92771.1Dammarenediol II synthase
XLOC_023403	EOY24590.1KNOTTED-like homeobox of 7
XLOC_023477	PSR89587.1Serine/threonine-protein kinase
XLOC_024356	PSR99484.1AT-hook motif nuclear-localized protein
XLOC_024497	PSS01615.1Zinc finger protein
XLOC_024506	XP_004241780.1ATP synthase subunit b', chloroplastic
XLOC_024852	RWR87638.1LRAT-like domain-containing protein
XLOC_025016	PSS31334.1Zinc-finger homeodomain protein
XLOC_025083	PSR84959.1DNA replication complex GINS protein
XLOC_025214	XP_024161769.1aquaporin NIP1-1-like
XLOC_025875	PIN23453.1putative dehydrogenase
XLOC_025878	ACD56615.1predicted protein
XLOC_026047	XP_021651259.1disease resistance protein At4g27190-like isoform X2
XLOC_026238	PSS07667.1Molybdenum cofactor sulfurase
XLOC_027014	XP_011089543.1root phototropism protein 2-like
XLOC_027372	XP_027127698.1sulfated surface glycoprotein 185-like isoform X2
XLOC_027462	ARQ20712.1auxin early response protein GH3.6
XLOC_027652	---NA---
XLOC_027892	PSS16014.1putative GPI-anchored protein
XLOC_028143	XP_023884310.1shaggy-related protein kinase epsilon isoform X1
XLOC_028329	PSS17888.1Epoxide hydrolase-like protein
XLOC_028697	XP_021636259.1probable methyltransferase PMT24
XLOC_028817	---NA---
XLOC_029094	PSR98075.1Protein SMAX1-LIKE like
XLOC_029153	PSS23910.1Phosphatase and actin regulator like
XLOC_029586	PSS30324.1UPF0494 membrane protein like
XLOC_029705	PSR84802.1B-box zinc finger protein
XLOC_029948	PSS26528.1Kinesin-like protein
XLOC_030088	PSS11167.1U11/U12 small nuclear ribonucleoprotein
XLOC_030192	PSS24938.1Abnormal spindle-like microcephaly-associated protein
XLOC_030205	PSR99967.1Auxin-responsive protein
XLOC_030225	PSR99899.1Transcription initiation factor TFIID subunit 4b like
XLOC_030296	PSR86708.1Fasciclin-like arabinogalactan protein
XLOC_030373	XP_018841633.1 probable beta-1,4-xylosyltransferase IRX10
XLOC_030546	PSS08242.1GDP-fucose protein O-fucosyltransferase protein
XLOC_030756	PON82504.1intracellular protein transporter USO1-like protein
XLOC_030798	PSR95922.1Nuclear speckle splicing regulatory protein like
XLOC_031017	PSS21146.1Protein POLYCHOME like
XLOC_031286	PSS30725.1Microtubule-associated protein RP/EB family member 1C like
XLOC_031327	PSS17774.1Protein tesmin/TSO1-like
XLOC_031627	PSS24484.1Sister chromatid cohesion 1 protein
XLOC_031758	PSS23903.1Long-chain-alcohol oxidase
XLOC_031796	NP_001353037.1delta(7)-sterol-C5(6)-desaturase 1
XLOC_031927	XP_027173152.1ABC transporter G family member 32 isoform X1
XLOC_031929	XP_012451296.1 sodium/pyruvate cotransporter BASS2, chloroplastic-like
XLOC_032121	XP_021900392.1actin-depolymerizing factor 5
XLOC_032150	PSR99831.1Rhomboid-like protease 5
XLOC_032261	PSS02865.1F-box protein
XLOC_032498	AGO05995.1bZIP transcription factor family protein 11
XLOC_033095	PSS02945.1Tobamovirus multiplication protein
XLOC_033135	XP_002275095.2 protein TPX2
XLOC_033172	XP_027166732.1zinc finger BED domain-containing protein RICESLEEPER 2-like
XLOC_033509	PSS10150.1Heavy metal-associated isoprenylated plant protein
XLOC_033599	XP_015883003.2protein YLS3
XLOC_033686	PSS04373.1Ferric reduction oxidase
XLOC_034006	PSR91573.1Osteocalcin 2 like
XLOC_034073	PSR96682.1Chromodomain-helicase-DNA-binding protein like
XLOC_034282	---NA---
XLOC_034444	XP_023924861.1uncharacterized protein LOC112036283
XLOC_034529	XP_021628914.1cyclin-dependent protein kinase inhibitor SMR10-like
XLOC_034533	XP_021628914.1cyclin-dependent protein kinase inhibitor SMR10-like
XLOC_034833	ARQ20701.1auxin early response protein AUX/IAA9
XLOC_034876	PSR84870.1Cysteine-rich repeat secretory protein
XLOC_035069	PSS33077.1Protein O-glucosyltransferase
XLOC_035228	PSS29439.1Syntaxin-112 like
XLOC_035438	PSS05607.1Protein TOO MANY MOUTHS like
XLOC_035506	XP_015895122.1beta-1,3-galactosyltransferase GALT1
XLOC_035547	XP_011013147.1 expansin-A1
XLOC_035722	PSS11580.1Peregrin like
XLOC_035864	XP_002276734.2 cycloartenol-C-24-methyltransferase isoform X2
XLOC_035886	PSS00292.1Developmental and secondary metabolism regulator veA like
XLOC_036085	PSS15615.1Serine/arginine repetitive matrix protein
XLOC_036134	PSS05671.1Fasciclin-like arabinogalactan protein
XLOC_036247	PSR97848.1Receptor-like protein kinase
XLOC_036273	XP_018824073.1 AAA-ATPase At2g18193-like
XLOC_036379	PSS23768.1Uncharacterized protein CEY00_Acc08591
XLOC_036831	PSR92849.1Fasciclin-like arabinogalactan protein
XLOC_036871	XP_023880886.1polygalacturonase QRT3-like isoform X1
XLOC_036884	XP_018841185.1 RING-H2 finger protein ATL74-like
XLOC_036991	PSS35702.1Chitinase-like protein
XLOC_037019	PSS05925.1 Alpha,alpha-trehalose-phosphate synthase
XLOC_037063	PSS28587.1Cytochrome P450 78A5 like
XLOC_037097	XP_002265127.1 probable methyltransferase PMT20
XLOC_037183	XP_012066701.1ras-related protein RABD1
XLOC_037228	PSS01177.1DDT domain-containing protein
XLOC_037285	PSS04645.1Galactinol--sucrose galactosyltransferase
XLOC_037417	PSS02799.1Protein DMR6-LIKE OXYGENASE 2 like
XLOC_037617	PSR86541.1Protein neuralized like
XLOC_037701	PSS21172.1Kinesin-like protein
XLOC_038311	XP_010650335.1 kinesin-like protein KIN-12B
XLOC_038478	PSR93501.1putative plant SNARE like
XLOC_038812	PSS17733.1Two-component response regulator like
XLOC_039093	XP_024467339.1receptor-like serine/threonine-protein kinase SD1-8
XLOC_039124	PON60511.1Glycoside hydrolase
XLOC_039260	PSS35715.1Serine incorporator
XLOC_039328	PSR93251.1Mini-chromosome maintenance complex-binding protein
XLOC_039565	PSS05933.1Protein trichome birefringence-like
XLOC_039623	XP_027083672.1transcription factor TGA9-like isoform X3
XLOC_039625	AES87954.1 cyclin-like protein
XLOC_039724	PSS04177.1Kinesin-like protein
XLOC_039840	PSS11065.1Leucine-rich repeat receptor-like serine/threonine-protein kinase
XLOC_039841	PSR98755.1Galactan beta-1,4-galactosyltransferase
XLOC_039960	XP_010646891.1 protein MCM10 homolog isoform X2
XLOC_039991	XP_022882039.1multicopper oxidase LPR2-like
XLOC_040291	PSS04658.1Paramyosin like
XLOC_040543	PSS30730.1Phosphatidylinositol 3,4,5-trisphosphate 3-phosphatase and protein-tyrosine-phosphatase
XLOC_040675	PSS07282.1Translation initiation factor eIF-2B subunit alpha like
XLOC_040701	PSS03969.1Ethylene-responsive transcription factor
XLOC_040857	PSS08182.1EGF domain-specific O-linked N-acetylglucosamine transferase
XLOC_040919	PSS17812.1Myb-related protein like
XLOC_040967	---NA---
XLOC_041024	PSS26864.1Polygalacturonase-1 non-catalytic subunit beta like
XLOC_041040	AJO70169.1alpha,alpha-trehalose-phosphate synthase 10
XLOC_041142	PSR86255.1ATP-dependent DNA helicase
XLOC_041222	PSS21727.1Magnesium transporter like
XLOC_041344	XP_018624405.1 glucan endo-1,3-beta-glucosidase 1 isoform X2
XLOC_041477	XP_010278672.1 probable beta-1,3-galactosyltransferase 2 isoform X1
XLOC_041548	PSS28854.1Titin like
XLOC_041721	PSS29029.1GDSL esterase/lipase
XLOC_041849	PSS05798.1B-box domain protein
XLOC_041887	RVW48680.1IRK-interacting protein
XLOC_041898	XP_017980810.1 beta-galactosidase 16
XLOC_041937	XP_019245143.1 10 kDa chaperonin 1, chloroplastic
XLOC_041949	PSR98241.1Protein LONGIFOLIA like
XLOC_042005	PSS01851.1Serine/threonine protein like
XLOC_042034	PSS07458.1Ring-infected erythrocyte surface antigen like
XLOC_042122	PSS16411.1Glucan endo-1,3-beta-glucosidase
XLOC_042209	PSS28693.1Hydroxyproline O-galactosyltransferase
XLOC_042218	XP_018515175.1 autophagy-related protein 8c
XLOC_042542	PSS11289.1Auxin response factor like
XLOC_042641	XP_018856432.1 protein EMBRYO SAC DEVELOPMENT ARREST 3, chloroplastic-like isoform X2
XLOC_043143	PSS31302.1Protein WALLS ARE THIN like
XLOC_043413	XP_011011335.1 phosphatidylinositol 4-phosphate 5-kinase 1-like isoform X1
XLOC_043484	PSS03932.1Protein of unknown function DUF688 protein
XLOC_043550	PSS31577.1Protein ECERIFERUM like
XLOC_043568	XP_021805715.1chloroplast stem-loop binding protein of 41 kDa a, chloroplastic
XLOC_043693	OMO49336.1Pathogenic type III effector avirulence factor Avr cleavage site
XLOC_043979	PSR95096.1Suppressor of disruption of TFIIS like
XLOC_043997	PSS30395.1Crescerin-2 like
XLOC_044137	XP_012851006.1 calmodulin-like protein 3
XLOC_044344	APR64321.1kinesin-related protein 11-like isoform X2
XLOC_044352	XP_011097178.1uncharacterized protein LOC105176156 isoform X1
XLOC_044574	PSS15484.1Protein Brevis radix-like
XLOC_044666	XP_007037979.2 probable inactive purple acid phosphatase 27 isoform X1
XLOC_044770	PSS35000.1Interactor of constitutive active ROPs 2 like
XLOC_044793	XP_027180066.1endoglucanase 17 isoform X2
XLOC_044821	PSS34905.1Glucomannan 4-beta-mannosyltransferase
XLOC_045107	XP_022760080.1ribonuclease 3-like protein 3
XLOC_045130	XP_017256541.1 aminotransferase ALD1-like
XLOC_045145	XP_027115943.1leucine-rich repeat extensin-like protein 1
XLOC_045294	PSR84952.1Lipid phosphate phosphatase
XLOC_045546	PSS33383.1RING-finger protein
XLOC_045908	PON92088.1Protein PAIR
XLOC_045966	XP_022954623.1kinesin-like protein KIN-14C
XLOC_046138	PSR86452.15'-3' exoribonuclease
XLOC_046152	PSR86510.1Stress-response A/B barrel domain-containing protein
XLOC_046692	XP_022845031.1zinc-finger homeodomain protein 11-like
XLOC_046807	XP_015574965.1mitochondrial inner membrane protease subunit 1
XLOC_046823	PSR88346.1Origin of replication complex subunit like
XLOC_046932	PSR93229.1SNF2 domain-containing protein
XLOC_047004	XP_010267036.1 dof zinc finger protein DOF3.1-like
XLOC_047131	PSS19080.1Serine/threonine-protein kinase
XLOC_047140	EOY11132.1Sulfate/thiosulfate import ATP-binding protein cysA
XLOC_047188	PSS11466.1Dihydrolipoyllysine-residue succinyltransferase component of 2-oxoglutarate dehydrogenase
XLOC_047269	XP_021652403.1ABC transporter C family member 10
XLOC_047733	PSR96147.1Protein Ycf2 like
XLOC_048125	PSR98503.1IQ domain-containing protein
XLOC_048189	PSS11062.1DNA replication licensing factor like
XLOC_048277	PSS04943.1RB1-inducible coiled-coil protein like
